# Supplementary material
Source: HighWire-hosted journal article supplement (https://jitc.bmj.com/content/10/9/e005320)
Supplement: inline-supplementary-material-1 [file inline-supplementary-material-1.xlsx]

## Sheet: Table S1
Supplementary Table S1. Clinicopathological features of patients and sequencing quality results																										Sequencing quality of PRE-treatment samples			Sequencing quality of POST-treatment samples
CODE	Pathological Response (3=CR, 2=MR, 1=IR)	CR_vs_Other (CR=1, Other=0)	PFS	Disease Progression (0=No, 1=Yes)	OS	Exitus (0=No, 1=Yes)	SEX (0=Men, 1=Women)	SMOKER (0=Former, 1=Smoker)	AGE	Histology (0=Sq, 1=Ade, 2=NOS)	T_ClinicalStage	N_ClinicalStage	M_ClinicalStage	PDL1 Pre	PDL1>=25%	TMB	TMBmed(1H_0L)	STK11 (0=No, 1=Yes)	KEAP1 (0=No; 1=Yes)	EGFR (0=No; 1=Yes)	Rb (0=No; 1=Yes)	TP53 (0=No; 1=Yes)	KRAS (0=No; 1=Yes)	IR PRE	IR POST	Mapped Reads	On Target	Targets Detected	Mapped Reads	On Target	Targets Detected
1			45.7333	0	45.7333	0	0	1	74	0	T3	N2	M0	0.4	1	5.05	0	0	0	0	0	0	0	1	0	2155786	0.9011	365	N/A	N/A	N/A
2	3	1	46.8333	0	46.8333	0	0	1	41	0	T3	N2	M0	0.9	1	4.21	0	0	0	0	0	1	0	1	1	2580850	0.8735	353	1923990	0.9168	355
4	3	1	44.8	0	44.8	0	1	0	59	1	T1a	N2	M0											0	1	N/A	N/A	N/A	3516326	0.9371	368
6	1	0	46.3333	0	46.3333	0	1	0	57	1	T3	N2	M0			12.57	1	0	0	0	1	0	0	0	1	N/A	N/A	N/A	2768216	0.9167	367
7	3	1	46.1	0	46.1	0	1	0	61	1	T1b	N2	M0	0.25	1	5.88	0	0	0	0	0	1	1	0	1	N/A	N/A	N/A	2749540	0.9431	370
9	3	1	43.6333	0	43.6333	0	1	0	60	0	T1a	N2	M0											0	1	N/A	N/A	N/A	2907857	0.9032	371
11	3	1	44.8	0	44.8	0	0	0	70	1	T1b	N2	M0											0	0	N/A	N/A	N/A	N/A	N/A	N/A
12	1	0	43.6	0	43.6	0	0	1	59	0	T2a	N2	M0	0.05	0	5.88	0	0	0	0	0	0	0	1	1	3319074	0.951	357	1343800	0.8536	303
13	3	1	17.4667	1	42.9667	0	1	0	68	1	T1b	N2	M0	1	1	2.52	0	0	0	1	0	1	0	0	1	N/A	N/A	N/A	3257503	0.9064	363
14	3	1	42	0	42	0	0	0	61	0	T4	N0	M0	1	1	9.25	1	0	0	0	0	0	0	1	1	3074961	0.9242	377	2239747	0.862	353
15	3	1	40.9	0	40.9	0	1	1	47	1	T4	N1	M0			73.95	1	0	1	0	0	0	0	0	1	N/A	N/A	N/A	1574720	0.8669	347
16	3	1	40.7333	0	40.7333	0	0	0	63	2	T1b	N2	M0											0	1	N/A	N/A	N/A	3238393	0.9454	369
17	3	1	41.5	0	41.5	0	0	1	59	1	T1b	N2	M0											0	0	N/A	N/A	N/A	N/A	N/A	N/A
18			22.9333	1	23.2	1	0	0	67	0	T3	N2	M0											0	0	N/A	N/A	N/A	N/A	N/A	N/A
19	3	1	38.8667	0	38.8667	0	0	1	56	1	T1b	N2	M0	0.6	1									0	1	N/A	N/A	N/A	1621375	0.6636	331
20	3	1	40.1	0	40.1	0	0	1	69	1	T1c	N2	M0	0.8	1	7.56	1	0	0	0	0	1	0	1	1	4145279	0.9535	367	2600417	0.9186	366
21	1	0	8.83333	1	26.0667	1	1	0	71	0	T3	N2	M0	0	0	1.68	0	0	0	0	0	0	0	0	1	N/A	N/A	N/A	3104374	0.8826	354
22	3	1	37.6667	0	37.6667	0	0	0	59	1	T3	N2	M0	0.8	1	1.68	0	0	0	0	0	0	0	0	1	N/A	N/A	N/A	3185396	0.8888	348
23	2	0	39.2667	0	39.2667	0	0	0	64	0	T4	N0	M0	0.75	1	3.36	0	0	0	0	0	1	0	1	1	4389138	0.9487	370	4587350	0.894	375
24	3	1	39.6	0	39.6	0	0	1	70	0	T4	N0	M0	0	0	5.89	1	0	0	0	0	0	0	1	1	3084425	0.9117	359	2653231	0.9114	368
26	3	1	40.4	0	40.4	0	0	1	60	2	T1c	N2	M0											0	1	N/A	N/A	N/A	1967117	0.9051	352
27	1	0	12.3	1	17.3	1	0	1	67	1	T3	N2	M0	0	0	5.06	0	0	0	0	0	1	1	1	1	3830341	0.9403	367	2655036	0.8759	344
28	2	0	21.4333	1	37.9667	0	0	1	41	1	T2b	N2	M0	0	0	17.62	1	1	0	0	0	0	0	0	1	N/A	N/A	N/A	1966956	0.8376	357
29	1	0	16.9333	1	36.6667	0	0	1	57	1	T1b	N2	M0	0.1	0	3.36	0	0	1	0	0	0	0	0	1	N/A	N/A	N/A	3624880	0.9247	368
30	2	0	36.8333	0	36.8333	0	0	1	66	1	T1b	N2	M0	0	0	1.69	0	0	0	0	0	0	0	0	1	N/A	N/A	N/A	2271212	0.9234	359
31			37.3667	0	37.3667	0	0	1	71	0	T4	N0	M0	0	0	6.71	1	0	0	0	0	1	0	1	0	4233937	0.9204	369	N/A	N/A	N/A
32	3	1	26.1667	1	26.1667	1	0	1	59	1	T4	N0	M0											0	1	N/A	N/A	N/A	2372225	0.8821	353
33	2	0	29.4667	1	35.7667	1	0	0	75	0	T2a	N2	M0											0	1	N/A	N/A	N/A	3647548	0.9368	358
34	3	1	37.5333	0	37.5333	0	1	1	43	1	T4	N0	M0	0.6	1	24.36	1	0	0	0	0	1	0	1	1	2910580	0.9382	371	3772586	0.9371	361
35	3	1	25.2667	1	25.2667	1	0	0	76	0	T4	N0	M0	0	0	37.63	1	0	0	0	0	1	0	0	1	888584	0.7693	275	3139331	0.9365	359
36	3	1	36.3667	0	36.3667	0	0	0	62	1	T1c	N2	M0	1	1									0	1	N/A	N/A	N/A	868184	0.9082	294
37	2	0	22.1333	1	36.3333	1	0	0	56	0	T4	N0	M0	0.5	1	7.57	1	0	1	0	0	1	0	1	0	3621453	0.9357	356	N/A	N/A	N/A
38	3	1	37	0	37	0	0	1	73	1	T1c	N2	M0	0	0	6.72	1	0	0	0	0	0	0	0	1	N/A	N/A	N/A	3133488	0.9265	341
39	2	0	36.3667	0	36.3667	0	1	1	58	1	T3	N1	M0											0	1	N/A	N/A	N/A	2397819	0.8856	365
40	3	1	34.8	0	34.8	0	1	0	70	1	T3	N2	M0			16.83	1	0	0	0	0	1	0	0	1	N/A	N/A	N/A	3620353	0.9187	365
42	3	1	34.5333	0	34.5333	0	0	0	62	1	T2b	N2	M0	0	0	5.88	0	0	0	0	1	0	1	1	0	3162191	0.9578	367	N/A	N/A	N/A
43	1	0	35.1	0	35.1	0	0	0	59	1	T3	N2	M0	0	0	6.72	1	0	0	0	0	0	1	1	1	2637512	0.9503	356	2197863	0.913	345
44			3.76667	1	12.9667	1	0	0	55	1	T3	N2	M0			24.39	1	0	0	0	1	0	0	0	0	N/A	N/A	N/A	N/A	N/A	N/A
45	1	0	34.2	0	34.2	0	0	0	73	0	T2a	N2	M0											0	1	N/A	N/A	N/A	3586211	0.9381	371
46	3	1	33.9667	1	34.1333	0	1	0	70	2	T2b	N1	M0											0	1	N/A	N/A	N/A	3239126	0.883	354
47	3	1	34.8667	0	34.8667	0	0	0	67	0	T3	N2	M0											1	1	3434171	0.9571	353	3208751	0.9355	355
48	3	1	35.5	0	35.5	0	0	0	75	1	T3	N2	M0	1	1									1	1	3197900	0.8993	375	2938277	0.948	371
49	2	0	34.5333	0	34.5333	0	1	1	72	1	T2a	N2	M0	0.1	0	8.42	1	0	0	0	0	0	0	0	1	N/A	N/A	N/A	890466	0.8765	340
50	2	0	34.5	0	34.5	0	0	0	76	0	T4	N0	M0											0	1	N/A	N/A	N/A	2669591	0.9396	360
51	3	1	27.3333	1	32.8667	0	0	1	70	2	T3	N2	M0	0.6	1	3.36	0	0	1	0	0	0	0	1	0	2892453	0.8996	366	N/A	N/A	N/A
52			4.66667	1	7.76667	1	0	1	56	1	T1b	N2	M0	0.75	1	4.2	0	0	0	0	0	1	0	0	0	N/A	N/A	N/A	N/A	N/A	N/A

## Sheet: Table S2
Supplementary Table S2. Gene list Oncomine Immune Response research assay and GSEA gene sets used
Gene	Target	NCBI_NAME	NCBI_ACCESSION	GENE_FUNCTION	GSEA_GENE_SET
ABCF1	ABCF1_11741283	ATP_binding_cassette_subfamily_F_member_1	NM_001025091	Housekeeping	Housekeeping
ADGRE5	ADGRE5_26552764	adhesion_G_protein‐coupled_receptor_E5	NM_078481	Adhesion,migration	Adhesion,migration
ADORA2A	ADORA2A_771873	adenosine_A2a_receptor	NM_000675	Checkpoint_pathway	Checkpoint_pathway
AIF1	AIF1_385491	allograft_inflammatory_factor_1	NM_001623	Macrophage	Macrophage
AKT1	AKT1_358467	AKT_serine_threonine_kinase_1	NM_001014431	Tumor_marker	Tumor_marker
ALOX15B	ALOX15B_13391445	arachidonate_15‐lipoxygenase_type_B	NM_001141	Macrophage	Macrophage
ARG1	ARG1_174278	arginase_1	NM_000045	Myeloid_marker	Myeloid_marker
AXL	AXL_24872596	AXL_receptor_tyrosine_kinase	NM_021913	Innate_immune_response	Innate_immune_response
B3GAT1	B3GAT1_170280	beta‐13‐glucuronyltransferase_1	NM_018644	NK_activation	NK_activation
BAGE	BAGE_153290	B_melanoma_antigen	NM_182482	Tumor_antigen	Tumor_antigen
BATF	BATF_237345	basic_leucine_zipper_ATF‐like_transcription_factor	NM_006399	Helper_T_cells	Helper_T_cells
BCL2	BCL2_10401144	B‐cell_CLL_lymphoma_2	NM_000633	Apoptosis	Apoptosis
BCL2L11	BCL2L11_620729	BCL2_like_11	NM_138621	Apoptosis	Apoptosis
BCL6	BCL6_21502257	B‐cell_CLL_lymphoma_6	NM_001706	Type_II_interferon_signaling	Type_II_interferon_signaling
BRCA1	BRCA1_42344338	BRCA1_DNA_repair_associated	NM_007300	Tumor_marker	Tumor_marker
BRCA2	BRCA2_98179922	BRCA2_DNA_repair_associated	NM_000059	Tumor_marker	Tumor_marker
BST2	BST2_218322	bone_marrow_stromal_cell_antigen_2	NM_004335	Type_I_interferon_signaling	Type_I_interferon_signaling
BTLA	BTLA_227334	B_and_T_lymphocyte_associated	NM_181780	Checkpoint_pathway	Checkpoint_pathway
BUB1	BUB1_701803	BUB1_mitotic_checkpoint_serine_threonine_kinase	NM_004336	Proliferation	Proliferation
C10orf54	C10orf54_562672	chromosome_10_open_reading_frame_54	NM_022153	Checkpoint_pathway	Checkpoint_pathway
C1QA	C1QA_67171	complement_component_1_q_subcomponent_A_chain	NM_015991	Innate_immune_response	Innate_immune_response
C1QB	C1QB_111199	complement_component_1_q_subcomponent_B_chain	NM_000491	Innate_immune_response	Innate_immune_response
CA4	CA4_420530	carbonic_anhydrase_4	NM_000717	Neutrophil	Neutrophil
CBLB	CBLB_296407	Cbl_proto‐oncogene_B	NM_170662	T_cell_receptor_signaling	T_cell_receptor_signaling
CCL17	CCL17_288394	C‐C_motif_chemokine_ligand_17	NM_002987	Chemokine_signaling	Chemokine_signaling
CCL18	CCL18_198296	C‐C_motif_chemokine_ligand_18	NM_002988	Lymphocyte_infiltrate	Lymphocyte_infiltrate
CCL2	CCL2_242346	C‐C_motif_chemokine_ligand_2	NM_002982	Lymphocyte_infiltrate	Lymphocyte_infiltrate
CCL20	CCL20_297403	C‐C_motif_chemokine_ligand_20	NM_004591	Chemokine_signaling	Chemokine_signaling
CCL21	CCL21_432539	C‐C_motif_chemokine_ligand_21	NM_002989	Lymphocyte_infiltrate	Lymphocyte_infiltrate
CCL22	CCL22_79185	C‐C_motif_chemokine_ligand_22	NM_002990	Chemokine_signaling	Chemokine_signaling
CCL3	CCL3_238343	C‐C_motif_chemokine_ligand_3	NM_002983	Lymphocyte_infiltrate	Lymphocyte_infiltrate
CCL4	CCL4_121220	C‐C_motif_chemokine_ligand_4	NM_002984	Lymphocyte_infiltrate	Lymphocyte_infiltrate
CCL5	CCL5_110219	C‐C_motif_chemokine_ligand_5	NM_002985	Lymphocyte_infiltrate	Lymphocyte_infiltrate
CCNB2	CCNB2_9861095	cyclin_B2	NM_004701	Proliferation	Proliferation
CCR1	CCR1_54149	C‐C_motif_chemokine_receptor_1	NM_001295	Cytokine_signaling	Cytokine_signaling
CCR2	CCR2_385483	C‐C_motif_chemokine_receptor_2	NM_001123396	Helper_T_cells	Helper_T_cells
CCR4	CCR4_76182	C‐C_motif_chemokine_receptor_4	NM_005508	Chemokine_signaling	Chemokine_signaling
CCR5	CCR5_85193	C‐C_motif_chemokine_receptor_5_gene_pseudogene	NM_001100168	Lymphocyte_infiltrate	Lymphocyte_infiltrate
CCR6	CCR6_271363	C‐C_motif_chemokine_receptor_6	NM_004367	Chemokine_signaling	Chemokine_signaling
CCR7	CCR7_133237	C‐C_motif_chemokine_receptor_7	NM_001838	TCR_coexpression	TCR_coexpression
CD14	CD14_329435	CD14_molecule	NM_000591	Dendridic_cell,macrophage	Dendridic_cell & Macrophage
CD160	CD160_194300	CD160_molecule	NM_007053	Checkpoint_pathway	Checkpoint_pathway
CD163	CD163_21422245	CD163_molecule	NM_004244	Macrophage	Macrophage
CD19	CD19_12011317	CD19_molecule	NM_001178098	B_cell_marker	B_cell_marker
CD1C	CD1C_12531357	CD1c_molecule	NM_001765	Antigen_presentation	Antigen_presentation
CD1D	CD1D_10661173	CD1d_molecule	NM_001766	Antigen_presentation	Antigen_presentation
CD2	CD2_350452	CD2_molecule	NM_001767	Lymphocyte_infiltrate	Lymphocyte_infiltrate
CD209	CD209_9921101	CD209_molecule	NM_021155	Dendridic_cell,macrophage	Dendridic_cell & Macrophage
CD22	CD22_10251132	CD22_molecule	NM_001771	B_cell_marker	B_cell_marker
CD226	CD226_9021006	CD226_molecule	NM_006566	Adhesion,migration	Adhesion,migration
CD244	CD244_868973	CD244_molecule	NM_001166663	Checkpoint_pathway	Checkpoint_pathway
CD247	CD247_152252	CD247_molecule	NM_198053	TCR_coexpression	TCR_coexpression
CD27	CD27_409517	CD27_molecule	NM_001242	Drug_target	Drug_target
CD274	CD274_461569	CD274_molecule	NM_014143	Checkpoint_pathway	Checkpoint_pathway
CD276	CD276_12011310	CD276_molecule	NM_001024736	Checkpoint_pathway	Checkpoint_pathway
CD28	CD28_601704	CD28_molecule	NM_006139	Checkpoint_pathway	Checkpoint_pathway
CD33	CD33_387493	CD33_molecule	NM_001772	Myeloid_marker	Myeloid_marker
CD37	CD37_496605	CD37_molecule	NM_001774	Lymphocyte_infiltrate	Lymphocyte_infiltrate
CD38	CD38_519628	CD38_molecule	NM_001775	Adhesion,migration	Adhesion,migration
CD3D	CD3D_400503	CD3d_molecule	NM_000732	TCR_coexpression	TCR_coexpression
CD3E	CD3E_677780	CD3e_molecule	NM_000733	TCR_coexpression	TCR_coexpression
CD3G	CD3G_616717	CD3g_molecule	NM_000073	TCR_coexpression	TCR_coexpression
CD4	CD4_147255	CD4_molecule	NM_000616	Helper_T_cells	Helper_T_cells
CD40	CD40_300407	CD40_molecule	NM_001250	Drug_target	Drug_target
CD40LG	CD40LG_479579	CD40_ligand	NM_000074	T_cell_receptor_signaling	T_cell_receptor_signaling
CD44	CD44_10151123	CD44_molecule_Indian_blood_group	NM_000610	Adhesion,migration	Adhesion,migration
CD47	CD47_826931	CD47_molecule	NM_001777	Adhesion,migration	Adhesion,migration
CD48	CD48_695798	CD48_molecule	NM_001778	Checkpoint_pathway	Checkpoint_pathway
CD52	CD52_70175	CD52_molecule	NM_001803	Lymphocyte_infiltrate	Lymphocyte_infiltrate
CD53	CD53_28133	CD53_molecule	NM_001040033	Adhesion,migration	Adhesion,migration
CD6	CD6_17771886	CD6_molecule	NM_006725	TCR_coexpression	TCR_coexpression
CD63	CD63_692800	CD63_molecule	NM_001780	Lymphocyte_infiltrate	Lymphocyte_infiltrate
CD68	CD68_172280	CD68_molecule	NM_001251	Macrophage	Macrophage
CD69	CD69_195303	CD69_molecule	NM_001781	Checkpoint_pathway	Checkpoint_pathway
CD70	CD70_259363	CD70_molecule	NM_001252	Drug_target	Drug_target
CD74	CD74_787896	CD74_molecule	NM_001025159	Antigen_processing	Antigen_processing
CD79A	CD79A_184290	CD79a_molecule	NM_001783	B_cell_receptor_signaling	B_cell_receptor_signaling
CD79B	CD79B_484590	CD79b_molecule	NM_001039933	B_cell_receptor_signaling	B_cell_receptor_signaling
CD80	CD80_457557	CD80_molecule	NM_005191	Checkpoint_pathway	Checkpoint_pathway
CD83	CD83_480580	CD83_molecule	NM_004233	Antigen_presentation	Antigen_presentation
CD86	CD86_169267	CD86_molecule	NM_175862	Checkpoint_pathway	Checkpoint_pathway
CD8A	CD8A_14271531	CD8a_molecule	NM_171827	TCR_coexpression	TCR_coexpression
CD8B	CD8B_403510	CD8b_molecule	NM_172213	TCR_coexpression	TCR_coexpression
CDK1	CDK1_837939	cyclin‐dependent_kinase_1	NM_001786	Proliferation	Proliferation
CDKN2A	CDKN2A_696829	cyclin‐dependent_kinase_inhibitor_2A	NM_000077	Tumor_marker	Tumor_marker
CDKN3	CDKN3_434534	cyclin‐dependent_kinase_inhibitor_3	NM_005192	Proliferation	Proliferation
CEACAM1	CEACAM1_10471155	carcinoembryonic_antigen_related_cell_adhesion_molecule_1	NM_001712	Checkpoint_pathway	Checkpoint_pathway
CEACAM8	CEACAM8_745847	carcinoembryonic_antigen_related_cell_adhesion_molecule_8	NM_001816	Myeloid_marker	Myeloid_marker
CIITA	CIITA_294397	class_II_major_histocompatibility_complex_transactivator	NM_000246	Type_II_interferon_signaling	Type_II_interferon_signaling
CLEC4C	CLEC4C_322429	C‐type_lectin_domain_family_4_member_C	NM_130441	Dendridic_cell	Dendridic_cell
CMKLR1	CMKLR1_36143	chemerin_chemokine‐like_receptor_1	NM_001142345	Dendridic_cell,macrophage	Dendridic_cell & Macrophage
CORO1A	CORO1A_457563	coronin_1A	NM_007074	Lymphocyte_infiltrate	Lymphocyte_infiltrate
CRTAM	CRTAM_312417	cytotoxic_and_regulatory_T‐cell_molecule	NM_019604	TCR_coexpression	TCR_coexpression
CSF1R	CSF1R_19612067	colony_stimulating_factor_1_receptor	NM_005211	Cytokine_signaling	Cytokine_signaling
CSF2RB	CSF2RB_11971301	colony_stimulating_factor_2_receptor_beta_common_subunit	NM_000395	Cytokine_signaling	Cytokine_signaling
CTAG1B	CTAG1B_276373	cancer_testis_antigen_1B	NM_001327	Tumor_antigen	Tumor_antigen
CTAG2	CTAG2_407763	cancer_testis_antigen_2	ENST00000369585	Tumor_antigen	Tumor_antigen
CTLA4	CTLA4_584689	cytotoxic_T‐lymphocyte_associated_protein_4	NM_005214	Drug_target	Drug_target
CTSS	CTSS_356460	cathepsin_S	NM_004079	Lymphocyte_infiltrate	Lymphocyte_infiltrate
CX3CL1	CX3CL1_190298	C‐X3‐C_motif_chemokine_ligand_1	NM_002996	Type_II_interferon_signaling	Type_II_interferon_signaling
CX3CR1	CX3CR1_35133	C‐X3‐C_motif_chemokine_receptor_1	NM_001337	Lymphocyte_infiltrate	Lymphocyte_infiltrate
CX3CR1	CX3CR1_147243	C‐X3‐C_motif_chemokine_receptor_1	NM_001171172	Lymphocyte_infiltrate	Lymphocyte_infiltrate
CX3CR1	CX3CR1_207292	C‐X3‐C_motif_chemokine_receptor_1	NM_001171171	Lymphocyte_infiltrate	Lymphocyte_infiltrate
CX3CR1	CX3CR1_58187	C‐X3‐C_motif_chemokine_receptor_1	NM_001171174	Lymphocyte_infiltrate	Lymphocyte_infiltrate
CXCL1	CXCL1_357459	C‐X‐C_motif_chemokine_ligand_1	NM_001511	Chemokine_signaling	Chemokine_signaling
CXCL10	CXCL10_354459	C‐X‐C_motif_chemokine_ligand_10	NM_001565	Type_II_interferon_signaling	Type_II_interferon_signaling
CXCL11	CXCL11_261361	C‐X‐C_motif_chemokine_ligand_11	NM_005409	Type_II_interferon_signaling	Type_II_interferon_signaling
CXCL13	CXCL13_202307	C‐X‐C_motif_chemokine_ligand_13	NM_006419	Type_II_interferon_signaling	Type_II_interferon_signaling
CXCL8	CXCL8_197302	C‐X‐C_motif_chemokine_ligand_8	NM_000584	Cytokine_signaling	Cytokine_signaling
CXCL9	CXCL9_149250	C‐X‐C_motif_chemokine_ligand_9	NM_002416	Type_II_interferon_signaling	Type_II_interferon_signaling
CXCR2	CXCR2_379486	C‐X‐C_motif_chemokine_receptor_2	NM_001557	Chemokine_signaling	Chemokine_signaling
CXCR3	CXCR3_11138	C‐X‐C_motif_chemokine_receptor_3	NM_001504	Chemokine_signaling	Chemokine_signaling
CXCR4	CXCR4_100208	C‐X‐C_motif_chemokine_receptor_4	NM_003467	Lymphocyte_infiltrate	Lymphocyte_infiltrate
CXCR5	CXCR5_153252	C‐X‐C_motif_chemokine_receptor_5	NM_001716	Type_II_interferon_signaling	Type_II_interferon_signaling
CXCR6	CXCR6_48153	C‐X‐C_motif_chemokine_receptor_6	NM_006564	Lymphocyte_infiltrate	Lymphocyte_infiltrate
CYBB	CYBB_14221529	cytochrome_b‐245_beta_chain	NM_000397	Type_II_interferon_signaling	Type_II_interferon_signaling
DDX58	DDX58_540643	DEXD_H‐box_helicase_58	NM_014314	Interferon_signaling	Interferon_signaling
DGAT2	DGAT2_439548	diacylglycerol_O‐acyltransferase_2	NM_032564	Neutrophil	Neutrophil
DMBT1	DMBT1_64696575	deleted_in_malignant_brain_tumors_1	NM_007329	Innate_immune_response	Innate_immune_response
EBI3	EBI3_527636	Epstein‐Barr_virus_induced_3	NM_005755	T_cell_regulation	T_cell_regulation
EFNA4	EFNA4_548649	ephrin_A4	NM_005227	Tumor_marker	Tumor_marker
EGFR	EGFR_31583261	epidermal_growth_factor_receptor	NM_005228	Tumor_marker	Tumor_marker
EGR2	EGR2_454559	early_growth_response_2	NM_000399	T_cell_differentiation	T_cell_differentiation
EGR3	EGR3_411516	early_growth_response_3	NM_004430	Tumor_marker	Tumor_marker
EIF2AK2	EIF2AK2_257357	eukaryotic_translation_initiation_factor_2_alpha_kinase_2	NM_001135651	Type_II_interferon_signaling	Type_II_interferon_signaling
ENTPD1	ENTPD1_708815	ectonucleoside_triphosphate_diphosphohydrolase_1	NM_001098175	Checkpoint_pathway	Checkpoint_pathway
EOMES	EOMES_9391044	eomesodermin	NM_005442	Checkpoint_pathway	Checkpoint_pathway
FAS	FAS_473575	Fas_cell_surface_death_receptor	NM_000043	B_cell_receptor_signaling	B_cell_receptor_signaling
FASLG	FASLG_417521	Fas_ligand	NM_000639	Type_II_interferon_signaling	Type_II_interferon_signaling
FCER1G	FCER1G_31138	Fc_fragment_of_IgE_receptor_Ig	NM_004106	Lymphocyte_infiltrate	Lymphocyte_infiltrate
FCGR1A	FCGR1A_547652	Fc_fragment_of_IgG_receptor_Ia	NM_000566	B_cell_marker	B_cell_marker
FCGR2B	FCGR2B_792903	Fc_fragment_of_IgG_receptor_IIb	NM_004001	B_cell_marker	B_cell_marker
FCGR3A	FCGR3A_575682	Fc_fragment_of_IgG_receptor_IIIa	NM_000569	Macrophage	Macrophage
FCGR3B	FCGR3B_620722	Fc_fragment_of_IgG_receptor_IIIb	NM_000570	NK_activation	NK_activation
FCRLA	FCRLA_710815	Fc_receptor_like_A	NM_001184866	B_cell_marker	B_cell_marker
FOXM1	FOXM1_10551166	forkhead_box_M1	NM_021953	Proliferation	Proliferation
FOXO1	FOXO1_9761081	forkhead_box_O1	NM_002015	PD‐1_signaling,tumor_marker	PD‐1_signaling & Tumor_marker
FOXP3	FOXP3_865975	forkhead_box_P3	NM_014009	T_cell_regulation	T_cell_regulation
FUT4	FUT4_31443252	fucosyltransferase_4	NM_002033	Myeloid_marker,stem_cell	Myeloid_marker
FYB	FYB_12891393	FYN_binding_protein	NM_001465	Lymphocyte_infiltrate	Lymphocyte_infiltrate
G6PD	G6PD_10841194	glucose‐6‐phosphate_dehydrogenase	NM_000402	Housekeeping	Housekeeping
GADD45GIP1	GADD45GIP1_329429	GADD45G_interacting_protein_1	NM_052850	Apoptosis	Apoptosis
GAGE1,GAGE12I,GAGE12F	GAGE1_144260	G_antigen_1	NM_001468,NM_001477,N	Tumor_antigen	Tumor_antigen
GAGE10	GAGE10_137250	G_antigen_10	NM_001098413	Tumor_antigen	Tumor_antigen
GAGE12J	GAGE12J_144260	G_antigen_12J	NM_001098406	Tumor_antigen	Tumor_antigen
GAGE13	GAGE13_116232	G_antigen_13	NM_001098412	Tumor_antigen	Tumor_antigen
GAGE2C,GAGE2A,GAGE2E	GAGE2C_104217	G_antigen_2C	NM_001472,NM_00112721	Tumor_antigen	Tumor_antigen
GATA3	GATA3_14061514	GATA_binding_protein_3	NM_001002295	Helper_T_cells	Helper_T_cells
GBP1	GBP1_771872	guanylate_binding_protein_1	NM_002053	Type_II_interferon_signaling	Type_II_interferon_signaling
GNLY	GNLY_251357	granulysin	NM_006433	NK_activation	NK_activation
GPR18	GPR18_238340	G_protein‐coupled_receptor_18	NM_001098200	TCR_coexpression	TCR_coexpression
GRAP2	GRAP2_283387	GRB2‐related_adaptor_protein_2	NM_004810	TCR_coexpression	TCR_coexpression
GUSB	GUSB_17671872	glucuronidase_beta	NM_000181	Housekeeping	Housekeeping
GZMA	GZMA_165265	granzyme_A	NM_006144	Lymphocyte_infiltrate	Lymphocyte_infiltrate
GZMB	GZMB_581688	granzyme_B	NM_004131	Lymphocyte_infiltrate	Lymphocyte_infiltrate
GZMH	GZMH_233339	granzyme_H	NM_033423	Lymphocyte_infiltrate	Lymphocyte_infiltrate
GZMK	GZMK_178286	granzyme_K	NM_002104	Lymphocyte_infiltrate	Lymphocyte_infiltrate
HAVCR2	HAVCR2_594705	hepatitis_A_virus_cellular_receptor_2	NM_032782	Checkpoint_pathway	Checkpoint_pathway
HERC6	HERC6_17021806	HECT_and_RLD_domain_containing_E3_ubiquitin_protein_ligase_family_member_6	NM_017912	Dendridic_cell	Dendridic_cell
HGF	HGF_14151518	hepatocyte_growth_factor	NM_000601	Cytokine_signaling	Cytokine_signaling
HIF1A	HIF1A_13371439	hypoxia_inducible_factor_1_alpha_subunit	NM_001530	PD‐1_signaling,tumor_marker	PD‐1_signaling & Tumor_marker
HLA‐A	HLA‐A_345445	major_histocompatibility_complex_class_I_A	NM_002116	Antigen_processing	Antigen_processing
HLA‐B	HLA‐B_639746	major_histocompatibility_complex_class_I_B	NM_005514	Antigen_processing	Antigen_processing
HLA‐C	HLA‐C_9191023	major_histocompatibility_complex_class_I_C	NM_002117	Antigen_processing	Antigen_processing
HLA‐DMA	HLA‐DMA_764869	major_histocompatibility_complex_class_II_DM_alpha	NM_006120	Antigen_processing	Antigen_processing
HLA‐DMB	HLA‐DMB_854962	major_histocompatibility_complex_class_II_DM_beta	NM_002118	Antigen_processing	Antigen_processing
HLA‐DOA	HLA‐DOA_55163	major_histocompatibility_complex_class_II_DO_alpha	NM_002119	Antigen_processing	Antigen_processing
HLA‐DOB	HLA‐DOB_182290	major_histocompatibility_complex_class_II_DO_beta	NM_002120	Antigen_processing	Antigen_processing
HLA‐DPA1	HLA‐DPA1_129237	major_histocompatibility_complex_class_II_DP_alpha_1	NM_033554	Antigen_processing	Antigen_processing
HLA‐DPB1	HLA‐DPB1_175280	major_histocompatibility_complex_class_II_DP_beta_1	NM_002121	Antigen_processing	Antigen_processing
HLA‐DQA1	HLA‐DQA1_587686	major_histocompatibility_complex_class_II_DQ_alpha_1	NM_002122	Antigen_processing	Antigen_processing
HLA‐DQA2	HLA‐DQA2_840937	major_histocompatibility_complex_class_II_DQ_alpha_2	NM_020056	Antigen_processing	Antigen_processing
HLA‐DQB2	HLA‐DQB2_142243	major_histocompatibility_complex_class_II_DQ_beta_2	NM_001198858	Antigen_processing	Antigen_processing
HLA‐DRA	HLA‐DRA_186294	major_histocompatibility_complex_class_II_DR_alpha	NM_019111	Antigen_processing	Antigen_processing
HLA‐DRB1	HLA‐DRB1_877982	major_histocompatibility_complex_class_II_DR_beta_1	NM_002124	Antigen_processing	Antigen_processing
HLA‐E	HLA‐E_639747	major_histocompatibility_complex_class_I_E	NM_005516	Antigen_processing	Antigen_processing
HLA‐F	HLA‐F_101204	major_histocompatibility_complex_class_I_F	NM_001098479	Antigen_processing	Antigen_processing
HLA‐F‐AS1	HLA‐F‐AS1_726834	HLA‐F_antisense_RNA_1	NR_026972	Antigen_processing	Antigen_processing
HLA‐G	HLA‐G_483585	major_histocompatibility_complex_class_I_G	NM_002127	Antigen_processing	Antigen_processing
HMBS	HMBS_796904	hydroxymethylbilane_synthase	NM_000190	Housekeeping	Housekeeping
ICAM1	ICAM1_605711	intercellular_adhesion_molecule_1	NM_000201	Type_II_interferon_signaling	Type_II_interferon_signaling
ICOS	ICOS_382487	inducible_T‐cell_costimulator	NM_012092	Checkpoint_pathway	Checkpoint_pathway
ICOSLG	ICOSLG_483588	inducible_T‐cell_costimulator_ligand	NM_015259	Checkpoint_pathway	Checkpoint_pathway
ID2	ID2_579679	inhibitor_of_DNA_binding_2_HLH_protein	NM_002166	T_cell_regulation	T_cell_regulation
ID3	ID3_572678	inhibitor_of_DNA_binding_3_HLH_protein	NM_002167	T_cell_regulation	T_cell_regulation
IDO1	IDO1_268369	indoleamine_23‐dioxygenase_1	NM_002164	Drug_target	Drug_target
IDO2	IDO2_458562	indoleamine_23‐dioxygenase_2	NM_194294	Checkpoint_pathway	Checkpoint_pathway
IFI27	IFI27_37143	interferon_alpha_inducible_protein_27	NM_005532	Type_I_interferon_signaling	Type_I_interferon_signaling
IFI35	IFI35_419526	interferon_induced_protein_35	NM_005533	Interferon_signaling	Interferon_signaling
IFI44L	IFI44L_12771376	interferon_induced_protein_44_like	NM_006820	Interferon_signaling	Interferon_signaling
IFI6	IFI6_47156	interferon_alpha_inducible_protein_6	NM_022873	Interferon_signaling	Interferon_signaling
IFIH1	IFIH1_20172123	interferon_induced_with_helicase_C_domain_1	NM_022168	Innate_immune_response	Innate_immune_response
IFIT1	IFIT1_158259	interferon_induced_protein_with_tetratricopeptide_repeats_1	NM_001548	Type_I_interferon_signaling	Type_I_interferon_signaling
IFIT2	IFIT2_124224	interferon_induced_protein_with_tetratricopeptide_repeats_2	NM_001547	Cytokine_signaling	Cytokine_signaling
IFIT3	IFIT3_72174	interferon_induced_protein_with_tetratricopeptide_repeats_3	NM_001031683	Type_I_interferon_signaling	Type_I_interferon_signaling
IFITM1	IFITM1_359459	interferon_induced_transmembrane_protein_1	NM_003641	Type_I_interferon_signaling	Type_I_interferon_signaling
IFITM2	IFITM2_316422	interferon_induced_transmembrane_protein_2	NM_006435	Type_I_interferon_signaling	Type_I_interferon_signaling
IFNA17	IFNA17_691788	interferon_alpha_17	NM_021268	T_cell_receptor_signaling	T_cell_receptor_signaling
IFNB1	IFNB1_579686	interferon_beta_1	NM_002176	Type_II_interferon_signaling	Type_II_interferon_signaling
IFNG	IFNG_400500	interferon_gamma	NM_000619	Type_II_interferon_signaling	Type_II_interferon_signaling
IGF1R	IGF1R_12291338	insulin_like_growth_factor_1_receptor	NM_000875	Adhesion,migration	Adhesion,migration
IGSF6	IGSF6_411515	immunoglobulin_superfamily_member_6	NM_005849	Lymphocyte_infiltrate	Lymphocyte_infiltrate
IKZF1	IKZF1_189301	IKAROS_family_zinc_finger_1	NM_006060	Lymphocyte_development	Lymphocyte_development
IKZF2	IKZF2_537639	IKAROS_family_zinc_finger_2	NM_016260	Lymphocyte_development	Lymphocyte_development
IKZF3	IKZF3_427534	IKAROS_family_zinc_finger_3	NM_012481	TCR_coexpression	TCR_coexpression
IKZF4	IKZF4_746852	IKAROS_family_zinc_finger_4	NM_022465	Lymphocyte_development	Lymphocyte_development
IL10	IL10_491598	interleukin_10	NM_000572	Drug_target	Drug_target
IL10RA	IL10RA_192296	interleukin_10_receptor_subunit_alpha	NM_001558	Lymphocyte_infiltrate	Lymphocyte_infiltrate
IL12A	IL12A_739842	interleukin_12A	NM_000882	Drug_target	Drug_target
IL12B	IL12B_314422	interleukin_12B	NM_002187	Drug_target	Drug_target
IL13	IL13_268378	interleukin_13	NM_002188	Cytokine_signaling	Cytokine_signaling
IL15	IL15_49155	interleukin_15	NM_000585	T_cell_regulation	T_cell_regulation
IL17A	IL17A_233320	interleukin_17A	NM_002190	Helper_T_cells	Helper_T_cells
IL17F	IL17F_35139	interleukin_17F	NM_052872	Dendridic_cell,macrophage	Dendridic_cell & Macrophage
IL18	IL18_140246	interleukin_18	NM_001562	T_cell_regulation	T_cell_regulation
IL1A	IL1A_14431546	interleukin_1_alpha	NM_000575	Cytokine_signaling	Cytokine_signaling
IL1B	IL1B_659766	interleukin_1_beta	NM_000576	Type_II_interferon_signaling	Type_II_interferon_signaling
IL2	IL2_366451	interleukin_2	NM_000586	Drug_target	Drug_target
IL21	IL21_368450	interleukin_21	NM_021803	Cytokine_signaling	Cytokine_signaling
IL22	IL22_263349	interleukin_22	NM_020525	T_cell_regulation	T_cell_regulation
IL23A	IL23A_386491	interleukin_23_subunit_alpha	NM_016584	Dendridic_cell,macrophage	Dendridic_cell & Macrophage
IL2RA	IL2RA_240338	interleukin_2_receptor_subunit_alpha	NM_000417	Cytokine_signaling	Cytokine_signaling
IL2RB	IL2RB_9991107	interleukin_2_receptor_subunit_beta	NM_000878	TCR_coexpression	TCR_coexpression
IL2RG	IL2RG_884988	interleukin_2_receptor_subunit_gamma	NM_000206	Lymphocyte_infiltrate	Lymphocyte_infiltrate
IL3RA	IL3RA_465565	interleukin_3_receptor_subunit_alpha	NM_002183	Dendridic_cell	Dendridic_cell
IL4	IL4_380477	interleukin_4	NM_000589	Cytokine_signaling	Cytokine_signaling
IL6	IL6_521626	interleukin_6	NM_000600	Cytokine_signaling	Cytokine_signaling
IL7	IL7_545652	interleukin_7	NM_000880	Cytokine_signaling	Cytokine_signaling
IL7R	IL7R_551658	interleukin_7_receptor	NM_002185	TCR_coexpression	TCR_coexpression
IRF1	IRF1_752861	interferon_regulatory_factor_1	NM_002198	Type_II_interferon_signaling	Type_II_interferon_signaling
IRF4	IRF4_786895	interferon_regulatory_factor_4	NM_002460	Interferon_signaling	Interferon_signaling
IRF9	IRF9_12191322	interferon_regulatory_factor_9	NM_006084	Type_II_interferon_signaling	Type_II_interferon_signaling
IRS1	IRS1_37283828	insulin_receptor_substrate_1	NM_005544	Tumor_marker	Tumor_marker
ISG15	ISG15_66173	ISG15_ubiquitin‐like_modifier	NM_005101	Type_I_interferon_signaling	Type_I_interferon_signaling
ISG20	ISG20_642750	interferon_stimulated_exonuclease_gene_20	NM_002201	Type_I_interferon_signaling	Type_I_interferon_signaling
ITGA1	ITGA1_814914	integrin_subunit_alpha_1	NM_181501	Adhesion,migration	Adhesion,migration
ITGAE	ITGAE_33753481	integrin_subunit_alpha_E	NM_002208	Adhesion,migration	Adhesion,migration
ITGAL	ITGAL_535638	integrin_subunit_alpha_L	NM_002209	Leukocyte_migration	Leukocyte_migration
ITGAM	ITGAM_31033209	integrin_subunit_alpha_M	NM_001145808	Leukocyte_migration	Leukocyte_migration
ITGAX	ITGAX_20482151	integrin_subunit_alpha_X	NM_000887	Dendridic_cell	Dendridic_cell
ITGB1	ITGB1_679777	integrin_subunit_beta_1	NM_002211	Adhesion,migration	Adhesion,migration
ITGB2	ITGB2_15421648	integrin_subunit_beta_2	NM_000211	Lymphocyte_infiltrate	Lymphocyte_infiltrate
ITGB7	ITGB7_24342544	integrin_subunit_beta_7	NM_000889	Leukocyte_migration	Leukocyte_migration
ITK	ITK_563669	IL2_inducible_T‐cell_kinase	NM_005546	TCR_coexpression	TCR_coexpression
JAML	JAML_78188	junction_adhesion_molecule_like	NM_001098526	Lymphocyte_infiltrate	Lymphocyte_infiltrate
JCHAIN	JCHAIN_134238	joining_chain_of_multimeric_IgA_and_IgM	NM_144646	B_cell_marker	B_cell_marker
KIAA0101	KIAA0101_319426	KIAA0101	NM_014736	Proliferation	Proliferation
KIR2DL1	KIR2DL1_9142	killer_cell_immunoglobulin_like_receptor_two_Ig_domains_and_long_cytoplasmic_tail_1	NM_014218	Drug_target	Drug_target
KIR2DL2	KIR2DL2_27126	killer_cell_immunoglobulin_like_receptor_two_Ig_domains_and_long_cytoplasmic_tail_2	NM_014218	NK_cell_marker	NK_cell_marker
KIR2DL3	KIR2DL3_654757	killer_cell_immunoglobulin_like_receptor_two_Ig_domains_and_long_cytoplasmic_tail_3	NM_015868	NK_cell_marker	NK_cell_marker
KLF2	KLF2_9111017	Kruppel_like_factor_2	NM_016270	T_cell_regulation,trafficking	T_cell_regulation
KLRB1	KLRB1_177284	killer_cell_lectin_like_receptor_B1	NM_002258	NK_activation	NK_activation
KLRD1	KLRD1_515619	killer_cell_lectin_like_receptor_D1	NM_002262	Drug_target	Drug_target
KLRF1	KLRF1_188285	killer_cell_lectin_like_receptor_F1	NM_016523	NK_activation	NK_activation
KLRG1	KLRG1_410518	killer_cell_lectin_like_receptor_G1	NM_005810	NK_activation	NK_activation
KLRK1	KLRK1_698804	killer_cell_lectin_like_receptor_K1	NM_007360	NK_activation	NK_activation
KREMEN1	KREMEN1_12861389	kringle_containing_transmembrane_protein_1	NM_032045	Neutrophil	Neutrophil
KRT5	KRT5_10631165	keratin_5	NM_000424	Tumor_marker	Tumor_marker
KRT7	KRT7_440543	keratin_7	NM_005556	Tumor_marker	Tumor_marker
LAG3	LAG3_13111419	lymphocyte_activating_3	NM_002286	Drug_target	Drug_target
LAMP1	LAMP1_374485	lysosomal_associated_membrane_protein_1	NM_005561	Lymphocyte_infiltrate	Lymphocyte_infiltrate
LAMP3	LAMP3_12361344	lysosomal_associated_membrane_protein_3	NM_014398	TCR_coexpression	TCR_coexpression
LAPTM5	LAPTM5_555664	lysosomal_protein_transmembrane_5	NM_006762	Lymphocyte_infiltrate	Lymphocyte_infiltrate
LCK	LCK_89192	LCK_proto‐oncogene_Src_family_tyrosine_kinase	NM_001042771	TCR_coexpression	TCR_coexpression
LCN2	LCN2_153259	lipocalin_2	NM_005564	Innate_immune_response	Innate_immune_response
LEXM	LEXM_10551156	lymphocyte_expansion_molecule	NM_001110533	T_cell_differentiation	T_cell_differentiation
LILRB1	LILRB1_15681666	leukocyte_immunoglobulin_like_receptor_B1	NM_001081637	Leukocyte_inhibition	Leukocyte_inhibition
LILRB2	LILRB2_891994	leukocyte_immunoglobulin_like_receptor_B2	NM_001080978	Lymphocyte_infiltrate	Lymphocyte_infiltrate
LMNA	LMNA_588696	lamin_A_C	NM_170707	Housekeeping	Housekeeping
LRG1	LRG1_24131	leucine_rich_alpha‐2‐glycoprotein_1	NM_052972	Neutrophil	Neutrophil
LRP1	LRP1_25642670	LDL_receptor_related_protein_1	NM_002332	Housekeeping	Housekeeping
LST1	LST1_22120	leukocyte_specific_transcript_1	NM_007161	Leukocyte_inhibition	Leukocyte_inhibition
LY9	LY9_13751476	lymphocyte_antigen_9	NM_002348	Lymphocyte_infiltrate	Lymphocyte_infiltrate
LYZ	LYZ_120222	lysozyme	NM_000239	Innate_immune_response	Innate_immune_response
M6PR	M6PR_229336	mannose‐6‐phosphate_receptor_cation_dependent	NM_002355	T_cell_regulation	T_cell_regulation
MAD2L1	MAD2L1_115221	MAD2_mitotic_arrest_deficient‐like_1_yeast	NM_002358	Proliferation	Proliferation
MADCAM1	MADCAM1_9291024	mucosal_vascular_addressin_cell_adhesion_molecule_1	NM_130760	Adhesion,migration	Adhesion,migration
MAGEA1	MAGEA1_22129	MAGE_family_member_A1	NM_004988	Tumor_antigen	Tumor_antigen
MAGEA10	MAGEA10_241320	MAGE_family_member_A10	NM_021048	Tumor_antigen	Tumor_antigen
MAGEA12	MAGEA12_30130	MAGE_family_member_A12	NM_005367	Tumor_antigen	Tumor_antigen
MAGEA3	MAGEA3_20121	MAGE_family_member_A3	NM_005362,NM_005363	Tumor_antigen	Tumor_antigen
MAGEA4	MAGEA4_28131	MAGE_family_member_A4	NM_001011548	Tumor_antigen	Tumor_antigen
MAGEC2	MAGEC2_249358	MAGE_family_member_C2	NM_016249	Tumor_antigen	Tumor_antigen
MAPK1	MAPK1_13241425	mitogen‐activated_protein_kinase_1	NM_002745	Tumor_marker	Tumor_marker
MAPK14	MAPK14_14031511	mitogen‐activated_protein_kinase_14	NM_139012	Innate_immune_response	Innate_immune_response
MELK	MELK_300401	maternal_embryonic_leucine_zipper_kinase	NM_014791	Proliferation	Proliferation
MIF	MIF_157270	macrophage_migration_inhibitory_factor_glycosylation‐inhibiting_factor	NM_002415	Innate_immune_response	Innate_immune_response
MKI67	MKI67_581686	marker_of_proliferation_Ki‐67	NM_002417	Proliferation	Proliferation
MLANA	MLANA_159265	melan‐A	NM_005511	Tumor_antigen	Tumor_antigen
MMP2	MMP2_11051213	matrix_metallopeptidase_2	NM_004530	Tumor_marker	Tumor_marker
MMP9	MMP9_11741283	matrix_metallopeptidase_9	NM_004994	Tumor_marker	Tumor_marker
MPO	MPO_15121620	myeloperoxidase	NM_000250	Myeloid_marker	Myeloid_marker
MRC1	MRC1_529634	mannose_receptor_C_type_1	NM_002438	Dendridic_cell,macrophage	Dendridic_cell & Macrophage
MS4A1	MS4A1_127232	membrane_spanning_4‐domains_A1	NM_021950	Drug_target	Drug_target
MTOR	MTOR_62366338	mechanistic_target_of_rapamycin	NM_004958	PD‐1_signaling,tumor_marker	PD‐1_signaling & Tumor_marker
MX1	MX1_232336	MX_dynamin_like_GTPase_1	NM_001178046	Interferon_signaling	Interferon_signaling
MYC	MYC_510619	v‐myc_avian_myelocytomatosis_viral_oncogene_homolog	NM_002467	Tumor_marker	Tumor_marker
NCAM1	NCAM1_26012709	neural_cell_adhesion_molecule_1	NM_181351	Adhesion,migration	Adhesion,migration
NCF1	NCF1_509617	neutrophil_cytosolic_factor_1	NM_000265	Chemokine_signaling	Chemokine_signaling
NCR1	NCR1_754861	natural_cytotoxicity_triggering_receptor_1	NM_004829	NK_cell_marker	NK_cell_marker
NCR3	NCR3_234342	natural_cytotoxicity_triggering_receptor_3	NM_147130	NK_cell_marker	NK_cell_marker
NECTIN2	NECTIN2_13881496	nectin_cell_adhesion_molecule_2	NM_001042724	Adhesion,migration	Adhesion,migration
NFATC1	NFATC1_27682875	nuclear_factor_of_activated_T‐cells_1	NM_172387	PD‐1_signaling	PD‐1_signaling
NFKBIA	NFKBIA_734840	NFKB_inhibitor_alpha	NM_020529	T_cell_receptor_signaling	T_cell_receptor_signaling
NKG7	NKG7_557664	natural_killer_cell_granule_protein_7	NM_005601	Lymphocyte_infiltrate	Lymphocyte_infiltrate
NOS2	NOS2_91195	nitric_oxide_synthase_2	NM_000625	Innate_immune_response	Innate_immune_response
NOTCH3	NOTCH3_738847	notch_3	NM_000435	Tumor_marker	Tumor_marker
NRP1	NRP1_14831588	neuropilin_1	NM_003873	Dendridic_cell	Dendridic_cell
NT5E	NT5E_12531355	5‐nucleotidase_ecto	NM_002526	Checkpoint_pathway	Checkpoint_pathway
NTN3	NTN3_12821377	netrin_3	NM_006181	B_cell_marker	B_cell_marker
OAS1	OAS1_757865	2‐5‐oligoadenylate_synthetase_1	NM_016816	Type_II_interferon_signaling	Type_II_interferon_signaling
OAS2	OAS2_15981707	2‐5‐oligoadenylate_synthetase_2	NM_016817	Interferon_signaling	Interferon_signaling
OAS3	OAS3_667776	2‐5‐oligoadenylate_synthetase_3	NM_006187	Interferon_signaling	Interferon_signaling
PDCD1	PDCD1_143244	programmed_cell_death_1	NM_005018	Drug_target	Drug_target
PDCD1LG2	PDCD1LG2_315423	programmed_cell_death_1_ligand_2	NM_025239	Checkpoint_pathway	Checkpoint_pathway
PECAM1	PECAM1_22132	platelet_and_endothelial_cell_adhesion_molecule_1	NM_000442	Adhesion,migration	Adhesion,migration
PGF	PGF_742842	placental_growth_factor	NM_002632	Tumor_marker	Tumor_marker
PIK3CA	PIK3CA_12781384	phosphatidylinositol‐45‐bisphosphate_3‐kinase_catalytic_subunit_alpha	NM_006218	PD‐1_signaling,tumor_marker	PD‐1_signaling & Tumor_marker
PIK3CD	PIK3CD_19842095	phosphatidylinositol‐45‐bisphosphate_3‐kinase_catalytic_subunit_delta	NM_005026	PD‐1_signaling,tumor_marker	PD‐1_signaling & Tumor_marker
PMEL	PMEL_233339	premelanosome_protein	NM_006928	Drug_target	Drug_target
POLR2A	POLR2A_42334334	polymerase_RNA_II_subunit_A	NM_000937	Housekeeping	Housekeeping
POU2AF1	POU2AF1_230337	POU_class_2_associating_factor_1	NM_006235	B_cell_marker	B_cell_marker
PRDM1	PRDM1_484588	PR_domain_1	NM_001198	PD‐1_signaling	PD‐1_signaling
PRF1	PRF1_672778	perforin_1	NM_005041	NK_activation	NK_activation
PSMB9	PSMB9_384491	proteasome_subunit_beta_9	NM_002800	Type_II_interferon_signaling	Type_II_interferon_signaling
PTEN	PTEN_19732078	phosphatase_and_tensin_homolog	NM_000314	PD‐1_signaling,tumor_marker	PD‐1_signaling & Tumor_marker
PTGS2	PTGS2_14761583	prostaglandin‐endoperoxide_synthase_2	NM_000963	Tumor_marker	Tumor_marker
PTK7	PTK7_15161625	protein_tyrosine_kinase_7_inactive	NM_002821	Tumor_marker	Tumor_marker
PTPN11	PTPN11_14261533	protein_tyrosine_phosphatase_non‐receptor_type_11	NM_002834	PD‐1_signaling,tumor_marker	PD‐1_signaling & Tumor_marker
PTPN6	PTPN6_17741884	protein_tyrosine_phosphatase_non‐receptor_type_6	NM_080548	T_cell_receptor_signaling	T_cell_receptor_signaling
PTPN7	PTPN7_471581	protein_tyrosine_phosphatase_non‐receptor_type_7	NM_001199797	Lymphocyte_infiltrate	Lymphocyte_infiltrate
PTPRC	PTPRC_710817	protein_tyrosine_phosphatase_receptor_type_C	NM_002838	Lymphocyte_infiltrate	Lymphocyte_infiltrate
PTPRCAP	PTPRCAP_383516	protein_tyrosine_phosphatase_receptor_type_C_associated_protein	NM_005608	TCR_coexpression	TCR_coexpression
PVR	PVR_9571064	poliovirus_receptor	NM_006505	Checkpoint_pathway	Checkpoint_pathway
PYGL	PYGL_586697	phosphorylase_glycogen_liver	NM_002863	Neutrophil	Neutrophil
RB1	RB1_24592560	RB_transcriptional_corepressor_1	NM_000321	Tumor_marker	Tumor_marker
RORC	RORC_12011307	RAR_related_orphan_receptor_C	NM_005060	Helper_T_cells	Helper_T_cells
RPS6	RPS6_124229	ribosomal_protein_S6	NM_001010	Tumor_marker	Tumor_marker
S100A8	S100A8_239334	S100_calcium_binding_protein_A8	NM_002964	Myeloid_marker,MDSC	Myeloid_marker
S100A9	S100A9_174280	S100_calcium_binding_protein_A9	NM_002965	Myeloid_marker,MDSC	Myeloid_marker
SAMHD1	SAMHD1_19002006	SAM_and_HD_domain_containing_deoxynucleoside_triphosphate_triphosphohydrolase_1	NM_015474	Lymphocyte_infiltrate	Lymphocyte_infiltrate
SDHA	SDHA_16361735	succinate_dehydrogenase_complex_flavoprotein_subunit_A	NM_004168	Housekeeping	Housekeeping
SELL	SELL_139245	selectin_L	NM_000655	Leukocyte_migration	Leukocyte_migration
SH2D1A	SH2D1A_540642	SH2_domain_containing_1A	NM_002351	Lymphocyte_activation	Lymphocyte_activation
SH2D1B	SH2D1B_173275	SH2_domain_containing_1B	NM_053282	Lymphocyte_activation	Lymphocyte_activation
SIT1	SIT1_148254	signaling_threshold_regulating_transmembrane_adaptor_1	NM_014450	Lymphocyte_infiltrate	Lymphocyte_infiltrate
SKAP2	SKAP2_809912	src_kinase_associated_phosphoprotein_2	NM_003930	B_cell_marker	B_cell_marker
SLAMF7	SLAMF7_9161020	SLAM_family_member_7	NM_021181	Drug_target	Drug_target
SLAMF8	SLAMF8_9071016	SLAM_family_member_8	NM_020125	Lymphocyte_infiltrate	Lymphocyte_infiltrate
SNAI1	SNAI1_138246	snail_family_transcriptional_repressor_1	NM_005985	Tumor_marker,stemness	Tumor_marker
SNAI2	SNAI2_722828	snail_family_transcriptional_repressor_2	NM_003068	Tumor_marker,stemness	Tumor_marker
SRGN	SRGN_230328	serglycin	NM_002727	Lymphocyte_infiltrate	Lymphocyte_infiltrate
SSX2	SSX2_233349	SSX_family_member_2	NM_003147	Tumor_antigen	Tumor_antigen
STAT1	STAT1_18871996	signal_transducer_and_activator_of_transcription_1	NM_007315	Type_II_interferon_signaling	Type_II_interferon_signaling
STAT3	STAT3_17511856	signal_transducer_and_activator_of_transcription_3	NM_139276	Drug_target	Drug_target
STAT4	STAT4_245352	signal_transducer_and_activator_of_transcription_4	NM_003151	Helper_T_cells	Helper_T_cells
STAT5A	STAT5A_18501954	signal_transducer_and_activator_of_transcription_5A	NM_003152	Cytokine_signaling	Cytokine_signaling
STAT6	STAT6_231339	signal_transducer_and_activator_of_transcription_6	NM_003153	Helper_T_cells	Helper_T_cells
TAGAP	TAGAP_10531160	T‐cell_activation_RhoGTPase_activating_protein	NM_054114	Lymphocyte_infiltrate	Lymphocyte_infiltrate
TAP1	TAP1_15701675	transporter_1_ATP‐binding_cassette_sub‐family_B_MDR_TAP	NM_000593	Type_II_interferon_signaling	Type_II_interferon_signaling
TARP	TARP_416517	TCR_gamma_alternate_reading_frame_protein	NM_001003806	Lymphocyte_infiltrate	Lymphocyte_infiltrate
TBP	TBP_259367	TATA‐box_binding_protein	NM_003194	Housekeeping	Housekeeping
TBX21	TBX21_9251036	T‐box_21	NM_013351	Type_II_interferon_signaling	Type_II_interferon_signaling
TCF7	TCF7_677799	transcription_factor_7_T‐cell_specific_HMG‐box	NM_003202	Tumor_marker	Tumor_marker
TDO2	TDO2_55162	tryptophan_23‐dioxygenase	NM_005651	Checkpoint_pathway	Checkpoint_pathway
TFRC	TFRC_10891196	transferrin_receptor	NM_001128148	Housekeeping	Housekeeping
TGFB1	TGFB1_13681474	transforming_growth_factor_beta_1	NM_000660	Checkpoint_pathway	Checkpoint_pathway
TIGIT	TIGIT_383491	T‐cell_immunoreceptor_with_Ig_and_ITIM_domains	NM_173799	TCR_coexpression	TCR_coexpression
TLR3	TLR3_24932595	toll_like_receptor_3	NM_003265	Dendridic_cell	Dendridic_cell
TLR7	TLR7_99206	toll_like_receptor_7	NM_016562	Innate_immune_response	Innate_immune_response
TLR8	TLR8_36137	toll_like_receptor_8	NM_138636	Lymphocyte_infiltrate	Lymphocyte_infiltrate
TLR9	TLR9_619727	toll_like_receptor_9	NM_017442	Drug_target	Drug_target
TNF	TNF_450555	tumor_necrosis_factor	NM_000594	Checkpoint_pathway	Checkpoint_pathway
TNFAIP8	TNFAIP8_188295	TNF_alpha_induced_protein_8	NM_014350	Lymphocyte_infiltrate	Lymphocyte_infiltrate
TNFRSF14	TNFRSF14_846950	tumor_necrosis_factor_receptor_superfamily_member_14	NM_003820	Checkpoint_pathway	Checkpoint_pathway
TNFRSF17	TNFRSF17_254359	tumor_necrosis_factor_receptor_superfamily_member_17	NM_001192	B_cell_marker	B_cell_marker
TNFRSF18	TNFRSF18_348456	tumor_necrosis_factor_receptor_superfamily_member_18	NM_004195	Drug_target	Drug_target
TNFRSF4	TNFRSF4_304389	tumor_necrosis_factor_receptor_superfamily_member_4	NM_003327	Drug_target	Drug_target
TNFRSF9	TNFRSF9_894998	tumor_necrosis_factor_receptor_superfamily_member_9	NM_001561	Drug_target	Drug_target
TNFSF10	TNFSF10_251357	tumor_necrosis_factor_superfamily_member_10	NM_003810	Apoptosis	Apoptosis
TNFSF13B	TNFSF13B_774879	tumor_necrosis_factor_superfamily_member_13b	NM_006573	B_cell_marker	B_cell_marker
TNFSF14	TNFSF14_224334	tumor_necrosis_factor_superfamily_member_14	NM_003807	Checkpoint_pathway	Checkpoint_pathway
TNFSF18	TNFSF18_128228	tumor_necrosis_factor_superfamily_member_18	NM_005092	Checkpoint_pathway	Checkpoint_pathway
TNFSF4	TNFSF4_347439	tumor_necrosis_factor_superfamily_member_4	NM_003326	Checkpoint_pathway	Checkpoint_pathway
TNFSF9	TNFSF9_325412	tumor_necrosis_factor_superfamily_member_9	NM_003811	Cytokine_signaling	Cytokine_signaling
TOP2A	TOP2A_27522855	topoisomerase_DNA_II_alpha	NM_001067	Proliferation	Proliferation
TP63	TP63_143246	tumor_protein_p63	NM_003722	Tumor_marker	Tumor_marker
TRIM29	TRIM29_882990	tripartite_motif_containing_29	NM_012101	Tumor_marker	Tumor_marker
TUBB	TUBB_369479	tubulin_beta_class_I	NM_178014	Housekeeping	Housekeeping
TWIST1	TWIST1_9291033	twist_family_bHLH_transcription_factor_1	NM_000474	Tumor_marker,stemness	Tumor_marker
TYROBP	TYROBP_350455	TYRO_protein_tyrosine_kinase_binding_protein	NM_198125	Lymphocyte_infiltrate	Lymphocyte_infiltrate
VCAM1	VCAM1_829933	vascular_cell_adhesion_molecule_1	NM_001078	Leukocyte_migration	Leukocyte_migration
VEGFA	VEGFA_17121817	vascular_endothelial_growth_factor_A	NM_001171623	Chemokine_signaling	Chemokine_signaling
VTCN1	VTCN1_49157	V‐set_domain_containing_T_cell_activation_inhibitor_1	NM_024626	Checkpoint_pathway	Checkpoint_pathway
XAGE1B	XAGE1B_469547	X_antigen_family_member_1B	NM_001097594	Tumor_antigen	Tumor_antigen
ZAP70	ZAP70_673781	zeta_chain_of_T_cell_receptor_associated_protein_kinase_70kDa	NM_001079	T_cell_receptor_signaling	T_cell_receptor_signaling
ZBTB46	ZBTB46_13361440	zinc_finger_and_BTB_domain_containing_46	NM_025224	Dendridic_cell	Dendridic_cell
ZEB1	ZEB1_74175	zinc_finger_E‐box_binding_homeobox_1	NM_001174093	Tumor_marker,stemness	Tumor_marker

## Sheet: Table S3
Supplementary Table S3. DESeq2 results: pre-treatment samples, differences by pathological response (CPR vs non-CPR)
	baseMean	log2FoldChange	|log2FoldChange|	FC >= 1,5	FC >= 2	lfcSE	stat	pvalue	padj	minus_log10_padj
GAGE1	71.2831	24.2849	24.2849	1	1	3.00538	8.08046	6.45215e-16	2.47762e-13	12.606
MAGEA10	38.9493	18.5131	18.5131	1	1	2.56387	7.22076	5.1698e-13	9.92602e-11	10.0032
MAGEA1	32.8247	20.7967	20.7967	1	1	3.17529	6.54954	5.77158e-11	7.38763e-09	8.13149
CD3D	2874.86	1.32017	1.32017	0	0	0.238994	5.52387	3.31609e-08	3.18345e-06	5.4971
IFNG	263.868	2.99044	2.99044	1	1	0.593654	5.03735	4.72012e-07	3.62506e-05	4.44069
NKG7	5274.27	2.22101	2.22101	1	1	0.451627	4.91779	8.75245e-07	5.60157e-05	4.25169
CD3E	5466.75	1.34982	1.34982	0	0	0.29214	4.62046	3.82898e-06	0.000210047	3.67768
CD38	2724.97	2.04019	2.04019	1	1	0.465682	4.38108	1.18092e-05	0.000566842	3.24654
GZMB	4153.55	2.2998	2.2998	1	1	0.538172	4.27335	1.92555e-05	0.000821569	3.08536
CXCL9	11246	2.49702	2.49702	1	1	0.599745	4.16347	3.13445e-05	0.00120363	2.91951
IDO1	3553.07	2.77893	2.77893	1	1	0.703211	3.95178	7.75731e-05	0.00270801	2.56735
IL2RB	3166.28	1.51624	1.51624	1	0	0.389553	3.89226	9.9313e-05	0.00317802	2.49784
PTPN11	11616.9	-1.2659	1.2659	0	0	0.338374	-3.74113	0.000183195	0.00541129	2.2667
CD8A	2085.5	1.2979	1.2979	0	0	0.351521	3.69226	0.000222272	0.0060966	2.21491
TFRC	21386.5	-2.10745	2.10745	1	1	0.587857	-3.58497	0.000337117	0.0086302	2.06398
CXCR6	529.771	1.48428	1.48428	0	0	0.425727	3.48647	0.00048944	0.00989355	2.00465
GBP1	12029.2	1.15327	1.15327	0	0	0.328218	3.51372	0.000441877	0.00989355	2.00465
HLA-F	691.435	1.13724	1.13724	0	0	0.326192	3.48642	0.000489525	0.00989355	2.00465
KLRK1	4731.02	1.21424	1.21424	0	0	0.344115	3.52858	0.000417791	0.00989355	2.00465
CRTAM	409.144	1.37201	1.37201	0	0	0.395887	3.46565	0.000528954	0.0101559	1.99328
MAGEA12	38.8504	-7.03829	7.03829	1	1	2.04295	-3.44516	0.000570723	0.0104361	1.98146
TARP	774.982	0.952302	0.952302	0	0	0.281187	3.38672	0.000707331	0.0123461	1.90847
CDK1	3648.51	-1.57867	1.57867	1	0	0.472622	-3.34024	0.000837072	0.0130453	1.88454
GNLY	5574.17	2.08108	2.08108	1	1	0.623785	3.3362	0.000849305	0.0130453	1.88454
NOTCH3	15473.5	-1.45388	1.45388	0	0	0.433901	-3.35071	0.000806044	0.0130453	1.88454
FASLG	580.242	1.58776	1.58776	1	0	0.492759	3.22218	0.00127217	0.018789	1.7261
MAPK1	7542.18	-1.60635	1.60635	1	0	0.501305	-3.20435	0.00135369	0.0192525	1.71551
ZAP70	924.846	1.0713	1.0713	0	0	0.340758	3.14387	0.00166728	0.0228656	1.64082
ITGB1	41838.7	-1.30814	1.30814	0	0	0.420954	-3.10755	0.00188646	0.0241468	1.61714
M6PR	12894	-0.999123	0.999123	0	0	0.320603	-3.11639	0.00183083	0.0241468	1.61714
TNFSF18	329.019	-3.39981	3.39981	1	1	1.09872	-3.09433	0.00197256	0.0244343	1.612
NCR1	77.5399	2.30449	2.30449	1	1	0.748673	3.0781	0.00208327	0.0249992	1.60207
HIF1A	14188	-1.36509	1.36509	0	0	0.44616	-3.05963	0.00221607	0.025787	1.5886
CCL5	4641.88	1.08673	1.08673	0	0	0.357069	3.04348	0.0023386	0.0264124	1.57819
CD3G	3199.82	0.905035	0.905035	0	0	0.301398	3.00279	0.00267521	0.0293509	1.53238
CXCL10	7794.9	1.74806	1.74806	1	0	0.592056	2.95253	0.00315183	0.0327109	1.48531
KIR2DL3	14.2715	7.00141	7.00141	1	1	2.36944	2.95488	0.00312788	0.0327109	1.48531
CCL4	3988.44	1.01704	1.01704	0	0	0.347014	2.93084	0.00338048	0.0332847	1.47776
IL1B	2032.56	-1.52778	1.52778	1	0	0.521226	-2.93112	0.00337738	0.0332847	1.47776
MIF	28826.1	-1.52614	1.52614	1	0	0.523342	-2.91614	0.00354389	0.0340213	1.46825
ARG1	25.3618	-6.64202	6.64202	1	1	2.29213	-2.89775	0.00375855	0.0344166	1.46323
CD2	5733.63	1.03469	1.03469	0	0	0.36287	2.8514	0.00435274	0.0344166	1.46323
CXCL13	2801.68	1.61797	1.61797	1	0	0.567441	2.85134	0.00435349	0.0344166	1.46323
GZMA	1942.69	1.16686	1.16686	0	0	0.408852	2.854	0.00431727	0.0344166	1.46323
HMBS	1179.96	-1.03303	1.03303	0	0	0.358582	-2.88087	0.00396582	0.0344166	1.46323
IFIT2	4021.52	-1.42313	1.42313	0	0	0.494509	-2.87787	0.00400369	0.0344166	1.46323
SIT1	444.793	1.0805	1.0805	0	0	0.379314	2.84856	0.0043917	0.0344166	1.46323
TBX21	494.282	1.33045	1.33045	0	0	0.460997	2.88603	0.00390132	0.0344166	1.46323
TNFRSF9	1144.91	1.64494	1.64494	1	0	0.574017	2.86566	0.00416143	0.0344166	1.46323
LAMP1	2457.44	-1.05481	1.05481	0	0	0.371529	-2.83911	0.0045239	0.0347436	1.45913
ICOSLG	1791.1	-1.04997	1.04997	0	0	0.373417	-2.81179	0.00492662	0.0363812	1.43912
IFIH1	2838.72	-1.19774	1.19774	0	0	0.425656	-2.81387	0.00489484	0.0363812	1.43912
FOXM1	4704.65	-1.44343	1.44343	0	0	0.51879	-2.7823	0.00539755	0.0391068	1.40775
STAT3	17738.8	-0.696893	0.696893	0	0	0.251443	-2.77157	0.00557861	0.0396701	1.40154
BRCA1	1250.6	-1.36557	1.36557	0	0	0.495665	-2.75503	0.00586863	0.0409737	1.3875
CDKN3	2623.32	-1.16043	1.16043	0	0	0.426157	-2.72301	0.00646899	0.0426352	1.37023
PRF1	672.165	1.26539	1.26539	0	0	0.465414	2.71886	0.00655072	0.0426352	1.37023
RPS6	92488.6	-1.01437	1.01437	0	0	0.371437	-2.73093	0.00631556	0.0426352	1.37023
SLAMF7	14592.6	1.38454	1.38454	0	0	0.507795	2.72657	0.00639967	0.0426352	1.37023
CD276	2453.95	-1.27392	1.27392	0	0	0.477105	-2.6701	0.00758277	0.0469643	1.32823
TIGIT	636.169	1.37184	1.37184	0	0	0.512881	2.67478	0.00747777	0.0469643	1.32823
TOP2A	8277.79	-1.36108	1.36108	0	0	0.508627	-2.67599	0.00745098	0.0469643	1.32823
MYC	7587.04	-1.64554	1.64554	1	0	0.627347	-2.62301	0.00871563	0.0522938	1.28155
PVR	5522.93	-0.918692	0.918692	0	0	0.350055	-2.62442	0.00867962	0.0522938	1.28155
LEXM	132.879	-1.99312	1.99312	1	0	0.764344	-2.60763	0.00911726	0.053862	1.26872
BCL2	1002.04	-1.10877	1.10877	0	0	0.42742	-2.59409	0.00948426	0.0550908	1.25892
CD8B	759.034	1.03702	1.03702	0	0	0.400474	2.58948	0.00961219	0.0550908	1.25892
CCR5	2718.42	1.01883	1.01883	0	0	0.394685	2.58136	0.00984107	0.0555731	1.25514
HLA-DQA1	9790.57	2.31637	2.31637	1	1	0.901603	2.56917	0.0101942	0.0559224	1.25241
MELK	3636.36	-1.15997	1.15997	0	0	0.451438	-2.5695	0.0101846	0.0559224	1.25241
BTLA	313.383	1.13914	1.13914	0	0	0.446588	2.55077	0.0107487	0.057548	1.23997
ZEB1	3174.59	-0.939816	0.939816	0	0	0.368639	-2.54942	0.0107903	0.057548	1.23997
PDCD1	341.211	1.36216	1.36216	0	0	0.535509	2.54367	0.0109696	0.0577031	1.2388
CCL20	2231.13	-1.91521	1.91521	1	0	0.755737	-2.53422	0.0112697	0.0584804	1.23299
LRP1	15050.7	-1.07419	1.07419	0	0	0.426383	-2.5193	0.0117587	0.0602047	1.22037
G6PD	8232.07	-1.50116	1.50116	1	0	0.597505	-2.51239	0.0119917	0.0605897	1.2176
KIAA0101	1223.54	-1.4206	1.4206	0	0	0.56957	-2.49417	0.0126253	0.0622698	1.20572
NRP1	10733.8	-1.0982	1.0982	0	0	0.440422	-2.49351	0.0126485	0.0622698	1.20572
ADGRE5	10204.5	0.990678	0.990678	0	0	0.400925	2.47098	0.0134742	0.0654951	1.18379
CXCR3	37.1301	2.33534	2.33534	1	1	0.949402	2.4598	0.0139014	0.065903	1.1811
IL1A	675.908	-2.32734	2.32734	1	1	0.94611	-2.4599	0.0138975	0.065903	1.1811
CXCL11	1665.5	1.60469	1.60469	1	0	0.654889	2.45032	0.0142729	0.0660338	1.18023
SNAI2	4203.11	-1.57684	1.57684	1	0	0.64335	-2.45098	0.0142468	0.0660338	1.18023
BUB1	3129.53	-0.971436	0.971436	0	0	0.397841	-2.44177	0.0146155	0.0666392	1.17627
PIK3CA	4121.36	-1.21107	1.21107	0	0	0.49666	-2.43844	0.0147509	0.0666392	1.17627
HGF	538.315	-2.14261	2.14261	1	1	0.880591	-2.43315	0.0149682	0.0668347	1.175
EFNA4	1178.58	-1.12564	1.12564	0	0	0.465046	-2.4205	0.0154991	0.0684097	1.16488
CXCL8	11703.9	-1.46652	1.46652	0	0	0.616929	-2.37712	0.0174482	0.0747658	1.1263
IFIT1	3979.28	-1.68473	1.68473	1	0	0.709419	-2.3748	0.0175584	0.0747658	1.1263
TAP1	19187.6	0.853552	0.853552	0	0	0.359765	2.37253	0.0176668	0.0747658	1.1263
TBP	2952.31	-0.956432	0.956432	0	0	0.403309	-2.37146	0.0177179	0.0747658	1.1263
MX1	19036.7	-1.50762	1.50762	1	0	0.64242	-2.34679	0.018936	0.0790373	1.10217
CEACAM1	1171.41	-1.47757	1.47757	0	0	0.63101	-2.34159	0.0192017	0.0792846	1.10081
B3GAT1	149.633	3.50386	3.50386	1	1	1.51629	2.31081	0.0208432	0.0851465	1.06983
LAG3	931.091	1.05535	1.05535	0	0	0.459114	2.29867	0.0215235	0.0870003	1.06048
SKAP2	2387.74	-0.975663	0.975663	0	0	0.426025	-2.29015	0.0220124	0.0880495	1.05527
TP63	136.443	2.62821	2.62821	1	1	1.15255	2.28035	0.0225871	0.0894171	1.04858
CCNB2	3438.92	-1.15829	1.15829	0	0	0.511823	-2.26306	0.0236318	0.0925979	1.0334
MTOR	6039.18	-0.748644	0.748644	0	0	0.331574	-2.25785	0.0239552	0.0929172	1.0319
ITK	943.615	0.754784	0.754784	0	0	0.337942	2.23347	0.0255178	0.0979883	1.00883
CCL2	9198.37	-1.18361	1.18361	0	0	0.533141	-2.22006	0.0264146	0.100428	0.998146
SH2D1A	393.427	1.18989	1.18989	0	0	0.539625	2.20502	0.0274524	0.10335	0.985689
XAGE1B	3990.26	7.03218	7.03218	1	1	3.21298	2.18868	0.0286204	0.106701	0.97183
PYGL	9693.65	-1.24563	1.24563	0	0	0.572008	-2.17764	0.029433	0.10837	0.96509
TLR7	657.226	-1.55446	1.55446	1	0	0.714704	-2.17497	0.0296325	0.10837	0.96509
CD6	1310.12	0.775446	0.775446	0	0	0.358018	2.16594	0.0303158	0.108925	0.962872
PSMB9	5530.99	0.805589	0.805589	0	0	0.372015	2.16547	0.0303515	0.108925	0.962872
GZMH	1102.93	0.999001	0.999001	0	0	0.465708	2.14512	0.0319431	0.11151	0.952684
IL10	341.846	-1.25172	1.25172	0	0	0.581616	-2.15215	0.0313856	0.11151	0.952684
TAGAP	2447.29	1.02267	1.02267	0	0	0.475996	2.14849	0.0316752	0.11151	0.952684
S100A9	30245.5	-1.689	1.689	1	0	0.793204	-2.12934	0.0332259	0.114944	0.939515
ITGAL	2366.19	0.959765	0.959765	0	0	0.453149	2.11799	0.034176	0.117175	0.931166
TUBB	27910.6	-0.719595	0.719595	0	0	0.343798	-2.09307	0.0363426	0.1235	0.908331
CLEC4C	88.5969	2.61763	2.61763	1	1	1.25437	2.08681	0.0369055	0.124313	0.905482
GADD45GIP1	11967.7	-0.981496	0.981496	0	0	0.475754	-2.06303	0.0391097	0.129467	0.887842
GPR18	202.797	1.11839	1.11839	0	0	0.541583	2.06504	0.0389194	0.129467	0.887842
STAT6	14554.3	-0.709156	0.709156	0	0	0.345398	-2.05316	0.0400574	0.131471	0.881172
EIF2AK2	17493.1	-0.910415	0.910415	0	0	0.446845	-2.03743	0.0416069	0.135399	0.868385
IRF4	4784.72	1.54165	1.54165	1	0	0.762038	2.02306	0.0430672	0.137236	0.862533
KREMEN1	3585.65	-1.38258	1.38258	0	0	0.683989	-2.02135	0.0432435	0.137236	0.862533
PTK7	14319.2	-1.00824	1.00824	0	0	0.498693	-2.02177	0.0432002	0.137236	0.862533
IL2RG	2715.71	0.628695	0.628695	0	0	0.313528	2.00523	0.0449387	0.141446	0.849408
HLA-G	21.8309	4.01934	4.01934	1	1	2.01147	1.99821	0.0456942	0.142655	0.845713
DDX58	10621.6	-0.895959	0.895959	0	0	0.451882	-1.98273	0.0473978	0.145673	0.83662
IL4	10.789	6.63614	6.63614	1	1	3.3473	1.98253	0.0474197	0.145673	0.83662
MAPK14	6147.59	-0.678235	0.678235	0	0	0.343847	-1.97249	0.0485534	0.147972	0.82982
CD247	1141.3	0.865665	0.865665	0	0	0.444937	1.94559	0.0517039	0.156333	0.805949
AKT1	9002.87	-0.675208	0.675208	0	0	0.35172	-1.91973	0.0548917	0.164675	0.783372
CCL22	742.486	-1.42964	1.42964	0	0	0.751886	-1.9014	0.0572494	0.166529	0.77851
EGFR	40648.1	-1.51934	1.51934	1	0	0.799175	-1.90113	0.0572848	0.166529	0.77851
IL23A	153.293	-1.64948	1.64948	1	0	0.867204	-1.90206	0.057163	0.166529	0.77851
LMNA	23726.8	-0.835812	0.835812	0	0	0.437432	-1.91072	0.0560402	0.166529	0.77851
LY9	119.77	1.46839	1.46839	0	0	0.774936	1.89485	0.0581118	0.166529	0.77851
NECTIN2	1668.14	-0.676585	0.676585	0	0	0.356633	-1.89714	0.0578089	0.166529	0.77851
ISG15	14300.6	-1.33412	1.33412	0	0	0.705898	-1.88996	0.0587634	0.167149	0.776896
LYZ	74874	1.21957	1.21957	0	0	0.646858	1.88538	0.059379	0.167658	0.775574
PRDM1	8877.37	-0.828383	0.828383	0	0	0.444645	-1.86302	0.0624595	0.175069	0.756791
ABCF1	13516.7	-0.637602	0.637602	0	0	0.343582	-1.85575	0.0634893	0.175395	0.755983
SNAI1	492.166	-1.4597	1.4597	0	0	0.785683	-1.85788	0.0631863	0.175395	0.755983
ENTPD1	4548.47	-0.695405	0.695405	0	0	0.376038	-1.84929	0.0644155	0.176683	0.752806
IRF1	7299.33	0.673351	0.673351	0	0	0.366975	1.83487	0.0665247	0.181174	0.741905
BCL2L11	1965.56	-0.745765	0.745765	0	0	0.407896	-1.82832	0.0675012	0.181408	0.741344
CD69	1001.88	1.07369	1.07369	0	0	0.587371	1.82796	0.0675555	0.181408	0.741344
IKZF1	11815.9	0.9972	0.9972	0	0	0.560598	1.77881	0.0752702	0.196673	0.706255
IRS1	4945.85	-0.807775	0.807775	0	0	0.453268	-1.78211	0.0747307	0.196673	0.706255
OAS1	12306.1	-1.10441	1.10441	0	0	0.61875	-1.7849	0.0742776	0.196673	0.706255
OAS3	4581.88	-0.838087	0.838087	0	0	0.471179	-1.7787	0.075289	0.196673	0.706255
CD63	48101.1	-0.77746	0.77746	0	0	0.438212	-1.77416	0.0760359	0.197282	0.704912
IL6	1284.6	1.33242	1.33242	0	0	0.753248	1.76891	0.0769096	0.19821	0.702875
TNF	703.122	0.63273	0.63273	0	0	0.364184	1.73739	0.0823183	0.210735	0.676264
IFNB1	889.106	1.3818	1.3818	0	0	0.81249	1.7007	0.0889988	0.226328	0.645262
IGSF6	1557.88	0.798313	0.798313	0	0	0.470516	1.69667	0.0897583	0.226758	0.644438
CCR4	363.091	0.734868	0.734868	0	0	0.436522	1.68346	0.0922855	0.230008	0.638258
FOXP3	544.066	0.739955	0.739955	0	0	0.443514	1.66839	0.0952376	0.230008	0.638258
GAGE2C	5.23389	5.59423	5.59423	1	1	3.34911	1.67036	0.0948477	0.230008	0.638258
IFITM2	10889.2	-0.707221	0.707221	0	0	0.421391	-1.6783	0.0932885	0.230008	0.638258
POLR2A	24331.8	-0.598688	0.598688	0	0	0.357315	-1.67552	0.0938324	0.230008	0.638258
PTEN	10168.5	-0.558895	0.558895	0	0	0.332515	-1.68081	0.0927997	0.230008	0.638258
RB1	4869.46	-0.715998	0.715998	0	0	0.428911	-1.66934	0.0950499	0.230008	0.638258
BATF	3656.31	0.582572	0.582572	0	0	0.354525	1.64325	0.100332	0.237438	0.62445
CCR7	618.244	0.741428	0.741428	0	0	0.451802	1.64105	0.100787	0.237438	0.62445
CD53	275.274	1.16519	1.16519	0	0	0.708836	1.64381	0.100216	0.237438	0.62445
ICAM1	9138.96	0.887623	0.887623	0	0	0.538589	1.64805	0.0993418	0.237438	0.62445
CORO1A	2550.27	0.51314	0.51314	0	0	0.317997	1.61367	0.1066	0.2496	0.602756
KLRD1	890.319	0.861483	0.861483	0	0	0.544835	1.58118	0.113837	0.264929	0.57687
CD48	962.309	0.645376	0.645376	0	0	0.410755	1.57119	0.116138	0.268101	0.571701
PTPN7	2863.44	0.779337	0.779337	0	0	0.496639	1.56922	0.116596	0.268101	0.571701
IKZF3	2605.53	0.698697	0.698697	0	0	0.446352	1.56535	0.117501	0.268573	0.570938
S100A8	41451.8	-1.5732	1.5732	1	0	1.00953	-1.55835	0.119151	0.270734	0.567458
CD44	1977.59	-1.49169	1.49169	0	0	0.96442	-1.54672	0.12193	0.273808	0.562554
STAT1	28962.5	0.524193	0.524193	0	0	0.338339	1.54931	0.121306	0.273808	0.562554
STAT5A	2068.94	0.467362	0.467362	0	0	0.302798	1.54348	0.122715	0.273968	0.5623
BCL6	16144.5	-0.829203	0.829203	0	0	0.54034	-1.5346	0.124883	0.277197	0.557211
KLRB1	1069.87	0.798939	0.798939	0	0	0.521752	1.53126	0.125705	0.277417	0.556866
CCR6	202.759	0.746019	0.746019	0	0	0.495985	1.50411	0.132552	0.289741	0.53799
TNFSF9	162.045	-1.0733	1.0733	0	0	0.714028	-1.50316	0.132798	0.289741	0.53799
LAMP3	2074.22	-1.00432	1.00432	0	0	0.675821	-1.48608	0.137258	0.297693	0.526231
TGFB1	21630.4	-0.419046	0.419046	0	0	0.282508	-1.48331	0.137993	0.297693	0.526231
CD28	1025.3	-0.733819	0.733819	0	0	0.498124	-1.47317	0.140706	0.301851	0.520208
GUSB	6818.47	-0.602779	0.602779	0	0	0.411789	-1.4638	0.143247	0.305595	0.514854
MAGEA4	76.2287	3.1457	3.1457	1	1	2.17335	1.4474	0.147786	0.313536	0.503713
MRC1	7569.38	-0.944653	0.944653	0	0	0.655264	-1.44164	0.149405	0.315227	0.501376
IL13	10.9335	3.02064	3.02064	1	1	2.10349	1.43601	0.150999	0.31634	0.499845
MAGEC2	278.931	-4.73291	4.73291	1	1	3.30056	-1.43397	0.15158	0.31634	0.499845
MKI67	3159.68	-0.679148	0.679148	0	0	0.474734	-1.43058	0.152549	0.316643	0.49943
HLA-E	71244.3	0.476	0.476	0	0	0.335933	1.41695	0.156497	0.323091	0.490675
DGAT2	431.591	-0.901946	0.901946	0	0	0.638137	-1.4134	0.157537	0.323498	0.490129
HLA-DMA	11857.2	0.593382	0.593382	0	0	0.421179	1.40886	0.158877	0.324515	0.488765
GRAP2	1254.87	0.567161	0.567161	0	0	0.403718	1.40484	0.160068	0.324611	0.488636
ID3	1746.27	-1.0477	1.0477	0	0	0.746754	-1.40301	0.160615	0.324611	0.488636
CD70	105.941	1.05439	1.05439	0	0	0.754339	1.39776	0.162184	0.325357	0.48764
IDO2	32.1767	2.42226	2.42226	1	1	1.735	1.39612	0.162679	0.325357	0.48764
HLA-DRB1	101895	1.09055	1.09055	0	0	0.783095	1.39262	0.163734	0.325772	0.487086
CD14	11038.1	-0.754007	0.754007	0	0	0.547281	-1.37773	0.168286	0.326372	0.486287
CDKN2A	12666.2	-1.23471	1.23471	0	0	0.894504	-1.38033	0.167484	0.326372	0.486287
IL21	13.342	2.19066	2.19066	1	1	1.587	1.38038	0.16747	0.326372	0.486287
IL3RA	1158.14	-0.599266	0.599266	0	0	0.431759	-1.38796	0.165148	0.326372	0.486287
MMP2	55727.7	-1.00948	1.00948	0	0	0.73203	-1.37901	0.167892	0.326372	0.486287
ID2	7791.52	-0.624439	0.624439	0	0	0.455458	-1.37101	0.170371	0.328756	0.483127
IL17A	23.4615	3.02064	3.02064	1	1	2.2159	1.36317	0.17283	0.331833	0.47908
ITGB7	2198.03	0.505121	0.505121	0	0	0.372692	1.35533	0.175312	0.334925	0.475052
TCF7	975.105	0.769532	0.769532	0	0	0.571742	1.34594	0.178321	0.338987	0.469817
AXL	2200.47	-0.473025	0.473025	0	0	0.353098	-1.33964	0.180363	0.339506	0.469153
PGF	1984.46	-0.891367	0.891367	0	0	0.66455	-1.34131	0.17982	0.339506	0.469153
CD226	1689.35	0.444701	0.444701	0	0	0.333666	1.33277	0.182607	0.342054	0.465906
IGF1R	32697.9	-0.701934	0.701934	0	0	0.527827	-1.32986	0.183566	0.342104	0.465842
NFATC1	415.481	-0.744381	0.744381	0	0	0.560831	-1.32728	0.184415	0.342104	0.465842
SDHA	8651.76	-0.546701	0.546701	0	0	0.414865	-1.31778	0.187577	0.346296	0.460552
MAGEA3	237.745	-2.51325	2.51325	1	1	1.91595	-1.31175	0.189604	0.348364	0.457967
CD163	8703.7	-0.765479	0.765479	0	0	0.588732	-1.30022	0.193527	0.352201	0.45321
CD86	1325.17	-0.607079	0.607079	0	0	0.466297	-1.30191	0.192945	0.352201	0.45321
CTLA4	391.323	0.604128	0.604128	0	0	0.466735	1.29437	0.195538	0.354182	0.450773
TLR3	369.321	-0.561243	0.561243	0	0	0.439242	-1.27775	0.201337	0.362973	0.440125
CSF1R	2643.33	-0.565344	0.565344	0	0	0.448344	-1.26096	0.207323	0.370289	0.43146
PECAM1	6459.4	0.872918	0.872918	0	0	0.691691	1.26201	0.206947	0.370289	0.43146
FCGR2B	399.378	1.06033	1.06033	0	0	0.844642	1.25535	0.20935	0.372178	0.429249
FOXO1	7241	-0.549073	0.549073	0	0	0.438848	-1.25117	0.210873	0.373157	0.428108
ZBTB46	264.669	-0.60669	0.60669	0	0	0.486003	-1.24833	0.211912	0.373276	0.42797
ITGA1	5622.09	-0.587373	0.587373	0	0	0.471817	-1.24492	0.213162	0.373763	0.427403
VTCN1	190.465	-1.54183	1.54183	1	0	1.24121	-1.2422	0.214164	0.373814	0.427344
CD52	11582.5	0.422761	0.422761	0	0	0.346248	1.22098	0.222093	0.384162	0.415486
IFITM1	28076.1	-0.475449	0.475449	0	0	0.388973	-1.22232	0.221588	0.384162	0.415486
CCR1	1503.32	-0.620923	0.620923	0	0	0.512206	-1.21225	0.225416	0.387382	0.411861
TNFSF4	160.754	-0.815768	0.815768	0	0	0.673744	-1.2108	0.225973	0.387382	0.411861
C10orf54	3640.47	-0.413577	0.413577	0	0	0.346044	-1.19516	0.232026	0.395241	0.403138
CXCR5	144.756	0.72593	0.72593	0	0	0.609387	1.19125	0.233557	0.395241	0.403138
POU2AF1	4648.43	0.812913	0.812913	0	0	0.682534	1.19102	0.233645	0.395241	0.403138
CD33	1361.05	-0.391326	0.391326	0	0	0.330693	-1.18335	0.23667	0.398307	0.399782
ITGAM	2078.7	-0.446687	0.446687	0	0	0.378171	-1.18118	0.237532	0.398307	0.399782
CCL3	1807.44	0.767649	0.767649	0	0	0.654407	1.17304	0.240778	0.401995	0.395779
KLRF1	74.1938	0.955914	0.955914	0	0	0.82125	1.16397	0.244434	0.406332	0.391119
VCAM1	4357.74	-0.801034	0.801034	0	0	0.691728	-1.15802	0.246856	0.40859	0.388712
SH2D1B	135.423	-0.826509	0.826509	0	0	0.717679	-1.15164	0.249469	0.411142	0.386009
TWIST1	1843.09	-0.738196	0.738196	0	0	0.650979	-1.13398	0.256804	0.421422	0.375282
BRCA2	2194.38	-0.615383	0.615383	0	0	0.545611	-1.12788	0.259372	0.423824	0.372814
CD19	362.875	0.846731	0.846731	0	0	0.754024	1.12295	0.261458	0.425424	0.371178
HLA-DOA	1354.96	0.641356	0.641356	0	0	0.572527	1.12022	0.26262	0.42551	0.37109
ITGAE	1062.61	-0.338698	0.338698	0	0	0.30443	-1.11256	0.265896	0.428118	0.368436
OAS2	8493.53	-0.556661	0.556661	0	0	0.500931	-1.11125	0.266459	0.428118	0.368436
CD244	290.29	0.443465	0.443465	0	0	0.410084	1.0814	0.279519	0.441493	0.355076
CD27	517.734	0.553633	0.553633	0	0	0.511968	1.08138	0.279527	0.441493	0.355076
CIITA	11638.2	0.470611	0.470611	0	0	0.437044	1.07681	0.281567	0.441493	0.355076
IFNA17	1737.44	0.897793	0.897793	0	0	0.833954	1.07655	0.281682	0.441493	0.355076
NCF1	6871.65	0.562211	0.562211	0	0	0.518518	1.08427	0.278247	0.441493	0.355076
PTPRC	1210.1	0.455026	0.455026	0	0	0.418234	1.08797	0.276609	0.441493	0.355076
ADORA2A	869.906	0.493539	0.493539	0	0	0.461913	1.06847	0.285309	0.444848	0.351788
TLR9	320.624	0.461895	0.461895	0	0	0.433042	1.06663	0.286139	0.444848	0.351788
ITGAX	2990.32	-0.510248	0.510248	0	0	0.481982	-1.05865	0.289761	0.44686	0.349828
MMP9	14342.1	-0.81397	0.81397	0	0	0.768794	-1.05876	0.289708	0.44686	0.349828
HLA-DPB1	25973.9	0.574826	0.574826	0	0	0.546685	1.05148	0.29304	0.450109	0.346682
CBLB	6518.87	-0.44268	0.44268	0	0	0.447982	-0.988165	0.323072	0.494261	0.306044
MS4A1	254.609	0.846142	0.846142	0	0	0.859814	0.984098	0.325067	0.49534	0.305096
NCAM1	379.938	0.644472	0.644472	0	0	0.66919	0.963063	0.335516	0.509242	0.293076
EOMES	614.834	0.54467	0.54467	0	0	0.576194	0.94529	0.344511	0.520835	0.2833
MAD2L1	1913.56	-0.464498	0.464498	0	0	0.49494	-0.938494	0.347991	0.521986	0.282341
RORC	1094.29	0.871964	0.871964	0	0	0.928542	0.939068	0.347696	0.521986	0.282341
IFI27	7441.01	-0.707198	0.707198	0	0	0.76264	-0.927303	0.353769	0.527075	0.278127
SAMHD1	6427.68	-0.327377	0.327377	0	0	0.353306	-0.926611	0.354129	0.527075	0.278127
IFI44L	4974.66	-0.540864	0.540864	0	0	0.599541	-0.902131	0.366987	0.542012	0.265991
IL18	3655.52	-0.391147	0.391147	0	0	0.432417	-0.90456	0.365699	0.542012	0.265991
IL7R	4921.58	-0.533249	0.533249	0	0	0.608026	-0.877018	0.380477	0.557819	0.253506
JAML	546.996	-0.381925	0.381925	0	0	0.43559	-0.876799	0.380596	0.557819	0.253506
TNFSF10	10001.1	-0.56269	0.56269	0	0	0.656657	-0.856901	0.391499	0.571619	0.242893
GZMK	365.151	0.775736	0.775736	0	0	0.915844	0.847018	0.396985	0.577433	0.238498
HLA-F-AS1	32.1192	0.861262	0.861262	0	0	1.02031	0.844121	0.398602	0.577596	0.238376
AIF1	7303.5	-0.360948	0.360948	0	0	0.450597	-0.801043	0.423107	0.586545	0.231699
CD83	1731.64	-0.407322	0.407322	0	0	0.506792	-0.803725	0.421556	0.586545	0.231699
CX3CL1	1432.78	-0.500811	0.500811	0	0	0.618427	-0.809814	0.418047	0.586545	0.231699
CYBB	9647.74	0.345255	0.345255	0	0	0.425599	0.811222	0.417238	0.586545	0.231699
DMBT1	2011.75	1.27166	1.27166	0	0	1.56303	0.813585	0.415883	0.586545	0.231699
GAGE10	9.74211	-1.81189	1.81189	1	0	2.25869	-0.802185	0.422446	0.586545	0.231699
HLA-DOB	910.577	0.419289	0.419289	0	0	0.514596	0.814794	0.41519	0.586545	0.231699
ICOS	197.632	0.352221	0.352221	0	0	0.436309	0.807276	0.419507	0.586545	0.231699
IL12A	346.359	-0.560026	0.560026	0	0	0.675429	-0.829141	0.407024	0.586545	0.231699
KRT5	183307	-1.28815	1.28815	0	0	1.60278	-0.803698	0.421572	0.586545	0.231699
LCK	15.2101	0.972868	0.972868	0	0	1.20194	0.809414	0.418277	0.586545	0.231699
TNFRSF18	1238.69	0.412749	0.412749	0	0	0.505382	0.816707	0.414096	0.586545	0.231699
CD1D	76.4337	-0.654064	0.654064	0	0	0.825779	-0.792057	0.428328	0.587537	0.230965
LILRB1	605.344	0.441975	0.441975	0	0	0.558112	0.791911	0.428413	0.587537	0.230965
TRIM29	32820.5	-1.12262	1.12262	0	0	1.41161	-0.795276	0.426453	0.587537	0.230965
CD209	2807.97	-0.443125	0.443125	0	0	0.561716	-0.788877	0.430184	0.587867	0.230721
C1QB	41937.2	0.387842	0.387842	0	0	0.498448	0.7781	0.43651	0.592727	0.227145
PMEL	108.149	-0.701074	0.701074	0	0	0.901631	-0.777562	0.436828	0.592727	0.227145
FCGR3B	797.643	-0.554865	0.554865	0	0	0.724074	-0.76631	0.443492	0.599651	0.222101
HERC6	2059.18	-0.487843	0.487843	0	0	0.641199	-0.760829	0.446759	0.600057	0.221807
IFI6	20868.2	-0.56459	0.56459	0	0	0.74489	-0.757951	0.44848	0.600057	0.221807
TYROBP	63101.8	-0.320045	0.320045	0	0	0.421719	-0.758906	0.447909	0.600057	0.221807
CXCR2	808.433	-0.602396	0.602396	0	0	0.815719	-0.738485	0.46022	0.613626	0.212096
EBI3	272.017	0.520186	0.520186	0	0	0.715997	0.72652	0.46752	0.621203	0.206766
IL2RA	1282.45	-0.369418	0.369418	0	0	0.51098	-0.722961	0.469704	0.621953	0.206242
CD68	26363.5	-0.352303	0.352303	0	0	0.49301	-0.714596	0.474859	0.626618	0.202997
CA4	44.6808	0.888144	0.888144	0	0	1.2597	0.705046	0.480782	0.629464	0.201029
CD22	648.933	-0.328778	0.328778	0	0	0.467549	-0.703196	0.481934	0.629464	0.201029
PIK3CD	2324.44	0.215245	0.215245	0	0	0.304156	0.707678	0.479145	0.629464	0.201029
IL7	361.855	-0.270639	0.270639	0	0	0.391176	-0.69186	0.489025	0.636561	0.19616
CXCR4	7117.97	-0.307227	0.307227	0	0	0.466657	-0.658358	0.510308	0.662022	0.179128
KLRG1	571.611	0.235455	0.235455	0	0	0.360999	0.652231	0.514252	0.664892	0.177249
FCGR1A	2603.87	-0.4344	0.4344	0	0	0.687665	-0.631703	0.527581	0.672613	0.172235
FUT4	4233.08	0.283743	0.283743	0	0	0.44948	0.63127	0.527864	0.672613	0.172235
IFIT3	2358.33	-0.304369	0.304369	0	0	0.48048	-0.633468	0.526428	0.672613	0.172235
LST1	1132.86	0.344799	0.344799	0	0	0.547682	0.62956	0.528982	0.672613	0.172235
TNFRSF17	321.218	0.579554	0.579554	0	0	0.920324	0.629729	0.528872	0.672613	0.172235
FCER1G	13460.3	-0.309566	0.309566	0	0	0.506881	-0.610727	0.54138	0.679453	0.167841
GATA3	656.22	0.259648	0.259648	0	0	0.424286	0.611964	0.540561	0.679453	0.167841
IL15	791.748	0.277436	0.277436	0	0	0.449096	0.617764	0.536731	0.679453	0.167841
MPO	53.1212	-0.574977	0.574977	0	0	0.941599	-0.610639	0.541439	0.679453	0.167841
BST2	28218.6	0.220127	0.220127	0	0	0.370094	0.594786	0.551986	0.685863	0.163763
CD37	4441.96	0.290236	0.290236	0	0	0.486839	0.596165	0.551065	0.685863	0.163763
NOS2	105.408	1.01414	1.01414	0	0	1.71238	0.592238	0.553691	0.685863	0.163763
TNFRSF4	495.158	0.292503	0.292503	0	0	0.489588	0.597448	0.550208	0.685863	0.163763
CD79A	3712.81	0.383183	0.383183	0	0	0.664069	0.577024	0.563923	0.696291	0.157209
EGR2	1643.43	0.287345	0.287345	0	0	0.506081	0.567785	0.570181	0.701761	0.153811
IKZF2	1474.89	0.407272	0.407272	0	0	0.721448	0.56452	0.5724	0.702242	0.153513
CD47	11918.9	-0.202113	0.202113	0	0	0.364268	-0.554847	0.578999	0.708076	0.14992
JCHAIN	13782.5	0.416986	0.416986	0	0	0.767092	0.543593	0.586721	0.715241	0.145547
NFKBIA	12291.2	-0.198651	0.198651	0	0	0.367788	-0.540123	0.589112	0.715883	0.145158
MADCAM1	26.8317	-1.08324	1.08324	0	0	2.0317	-0.533171	0.593915	0.719443	0.143004
TLR8	569.551	-0.309239	0.309239	0	0	0.585655	-0.528022	0.597484	0.72149	0.14177
CCL17	627.112	-0.416556	0.416556	0	0	0.804952	-0.517492	0.604813	0.72805	0.137839
HLA-DQB2	290.813	0.666214	0.666214	0	0	1.30781	0.509412	0.610464	0.732556	0.135159
CCR2	521.744	0.453456	0.453456	0	0	0.90439	0.501394	0.616094	0.734721	0.133878
FYB	7135.71	0.190929	0.190929	0	0	0.37931	0.503359	0.614712	0.734721	0.133878
C1QA	23857.9	0.267625	0.267625	0	0	0.544484	0.491521	0.623058	0.739691	0.130949
LAPTM5	16078.3	-0.278472	0.278472	0	0	0.568278	-0.490027	0.624115	0.739691	0.130949
CX3CR1	113.393	0.330166	0.330166	0	0	0.683048	0.483371	0.628832	0.74299	0.129017
KLF2	3553.9	-0.240961	0.240961	0	0	0.510592	-0.471925	0.636981	0.750138	0.124859
TNFSF13B	3169.24	0.216287	0.216287	0	0	0.460781	0.469392	0.638789	0.750138	0.124859
FAS	3213.65	-0.151669	0.151669	0	0	0.333913	-0.454217	0.649673	0.760593	0.118848
SLAMF8	2731.32	-0.272162	0.272162	0	0	0.611729	-0.444906	0.656388	0.766118	0.115704
LILRB2	1207.63	0.196068	0.196068	0	0	0.454263	0.431617	0.66602	0.775005	0.110696
CD160	73.4843	0.368045	0.368045	0	0	0.887293	0.414795	0.678292	0.786901	0.10408
IL12B	37.0672	0.505432	0.505432	0	0	1.2694	0.398165	0.690509	0.798661	0.0976377
CXCL1	15604.1	0.280003	0.280003	0	0	0.709429	0.394688	0.693073	0.799219	0.0973341
CD4	3521.59	-0.162714	0.162714	0	0	0.432085	-0.376579	0.706487	0.810074	0.0914753
PTPRCAP	29.2183	0.610881	0.610881	0	0	1.62345	0.376285	0.706705	0.810074	0.0914753
HAVCR2	3684.27	-0.153068	0.153068	0	0	0.431798	-0.354491	0.722971	0.826253	0.0828871
NCR3	63.168	0.488646	0.488646	0	0	1.41414	0.345544	0.729686	0.831452	0.0801629
CCL21	4658.84	-0.384659	0.384659	0	0	1.1284	-0.340889	0.733187	0.832826	0.0794458
TDO2	1282.91	-0.228242	0.228242	0	0	0.680706	-0.335301	0.737398	0.832826	0.0794458
TNFRSF14	3828.17	0.132708	0.132708	0	0	0.393381	0.337351	0.735852	0.832826	0.0794458
CMKLR1	14.2984	0.676396	0.676396	0	0	2.10653	0.321095	0.748138	0.842478	0.0744413
CD40LG	191.184	0.263777	0.263777	0	0	0.830377	0.31766	0.750743	0.84294	0.0742035
HLA-DQA2	10.8849	0.474862	0.474862	0	0	1.51747	0.31293	0.754334	0.844502	0.0733994
IRF9	16033.5	0.132343	0.132343	0	0	0.471032	0.280964	0.778738	0.868611	0.0611744
PTPN6	9095.05	-0.102753	0.102753	0	0	0.368547	-0.278807	0.780393	0.868611	0.0611744
CTSS	10077.2	-0.135544	0.135544	0	0	0.495259	-0.273683	0.784329	0.870469	0.0602468
NTN3	66.0524	-0.302125	0.302125	0	0	1.14625	-0.263577	0.792106	0.876567	0.0572148
HLA-C	29028.7	0.221522	0.221522	0	0	0.898191	0.246631	0.805194	0.88849	0.0513475
HLA-B	15636	0.385966	0.385966	0	0	1.67297	0.230707	0.817542	0.897706	0.0468661
ISG20	4126.39	0.115228	0.115228	0	0	0.501355	0.229833	0.818221	0.897706	0.0468661
CD274	1662.48	-0.126503	0.126503	0	0	0.627595	-0.201568	0.840254	0.919253	0.0365651
FCGR3A	6181.22	-0.0996362	0.0996362	0	0	0.514078	-0.193816	0.84632	0.921791	0.0353677
TNFSF14	100.394	0.280644	0.280644	0	0	1.45813	0.192469	0.847375	0.921791	0.0353677
FCRLA	184.213	-0.161734	0.161734	0	0	0.856204	-0.188897	0.850174	0.922222	0.0351643
IL2	6.76669	0.536551	0.536551	0	0	3.07511	0.174482	0.861487	0.931861	0.0306486
CD40	1439.8	0.0448793	0.0448793	0	0	0.268731	0.167005	0.867367	0.935586	0.0289161
CD79B	484.02	0.0840026	0.0840026	0	0	0.581604	0.144433	0.885159	0.938953	0.0273561
IL10RA	5454	-0.0649311	0.0649311	0	0	0.441143	-0.147188	0.882983	0.938953	0.0273561
PDCD1LG2	1712.17	0.0824183	0.0824183	0	0	0.529863	0.155546	0.876391	0.938953	0.0273561
SELL	346.668	-0.0649147	0.0649147	0	0	0.448041	-0.144886	0.884801	0.938953	0.0273561
TNFAIP8	1665.91	-0.0571174	0.0571174	0	0	0.378458	-0.150921	0.880038	0.938953	0.0273561
VEGFA	38190.6	-0.0930282	0.0930282	0	0	0.601912	-0.154554	0.877173	0.938953	0.0273561
HLA-DPA1	60528.9	0.124495	0.124495	0	0	0.927576	0.134215	0.893232	0.944907	0.024611
HLA-DMB	1523.6	-0.162811	0.162811	0	0	1.28445	-0.126756	0.899134	0.948537	0.0229458
ALOX15B	452.425	0.106804	0.106804	0	0	0.937274	0.113952	0.909276	0.956608	0.019266
CD74	17896.2	0.0593823	0.0593823	0	0	0.552704	0.10744	0.91444	0.957185	0.0190042
IFI35	2947.17	-0.0413644	0.0413644	0	0	0.386676	-0.106974	0.914809	0.957185	0.0190042
STAT4	691.783	0.0363057	0.0363057	0	0	0.362416	0.100177	0.920204	0.960213	0.0176325
CCL18	15365.9	0.0793299	0.0793299	0	0	0.820401	0.0966965	0.922967	0.960486	0.0175088
EGR3	1177.2	0.0612097	0.0612097	0	0	0.723446	0.0846086	0.932573	0.96525	0.01536
LCN2	37832.1	0.0694854	0.0694854	0	0	0.814276	0.085334	0.931996	0.96525	0.01536
HLA-A	37502.3	0.119011	0.119011	0	0	1.7267	0.0689237	0.94505	0.968095	0.0140821
HLA-DRA	75828.2	0.0379022	0.0379022	0	0	0.544556	0.069602	0.94451	0.968095	0.0140821
LRG1	1568.41	0.0575738	0.0575738	0	0	0.840764	0.0684779	0.945405	0.968095	0.0140821
NT5E	2714.43	-0.0510033	0.0510033	0	0	0.660668	-0.0771996	0.938465	0.968095	0.0140821
BAGE	10.3501	-0.162336	0.162336	0	0	3.41402	-0.0475498	0.962075	0.982545	0.00764768
CD80	3737.57	-0.0162065	0.0162065	0	0	0.407826	-0.0397387	0.968301	0.986281	0.00599954
CD1C	508.499	0.0183524	0.0183524	0	0	0.668665	0.0274463	0.978104	0.991008	0.00392305
PTGS2	1710.91	0.0160434	0.0160434	0	0	0.568306	0.0282302	0.977479	0.991008	0.00392305
CSF2RB	11713.8	0.00660093	0.00660093	0	0	0.321072	0.020559	0.983597	0.991418	0.00374303
ITGB2	5922.44	-0.00685208	0.00685208	0	0	0.489723	-0.0139917	0.988837	0.991418	0.00374303
KRT7	18721.7	0.0163577	0.0163577	0	0	0.91741	0.0178303	0.985774	0.991418	0.00374303
SRGN	9575.87	-0.00624098	0.00624098	0	0	0.368876	-0.0169189	0.986501	0.991418	0.00374303
IKZF4	193.915	2.11383e-05	2.11383e-05	0	0	0.493366	4.2845e-05	0.999966	0.999966	1.48468e-05
CEACAM8	3.3964	-5.97859	5.97859	1	1	3.29617	-1.8138	0.0697088	NA	#VALUE!
CTAG1B	0	0	0	0	0	0	0	1	NA	#VALUE!
CTAG2	3.73376	4.04316	4.04316	1	1	2.86718	1.41015	0.158495	NA	#VALUE!
GAGE12J	1.29359	-1.48378	1.48378	0	0	3.28362	-0.451873	0.65136	NA	#VALUE!
GAGE13	0.631426	2.54343	2.54343	1	1	3.3746	0.753699	0.45103	NA	#VALUE!
IL17F	2.38523	4.46129	4.46129	1	1	3.3533	1.33042	0.183381	NA	#VALUE!
IL22	0.991708	3.19857	3.19857	1	1	3.36405	0.950809	0.341701	NA	#VALUE!
KIR2DL1	0.469499	2.12513	2.12513	1	1	3.38428	0.627943	0.530041	NA	#VALUE!
KIR2DL2	2.52733	4.54062	4.54062	1	1	3.35289	1.35424	0.17566	NA	#VALUE!
MLANA	0	NA	#VALUE!	#VALUE!	#VALUE!	NA	NA	NA	NA	#VALUE!
SSX2	0	NA	#VALUE!	#VALUE!	#VALUE!	NA	NA	NA	NA	#VALUE!

## Sheet: Table S4
Supplementary Table S4. ROC curve results of DEGs in pre-treatment samples
Gene	p-value U-Mann Whitney	Area	Std. Error	95% CI	p-value ROC curve
GAGE1	0.364	---	---	---	---
MAGEA10	0.19	---	---	---	---
MAGEA1	0.364	---	---	---	---
TFRC	0.06	---	---	---	---
MAGEA12	0.06	---	---	---	---
MAPK1	0.147	---	---	---	---
IL1B	0.24	---	---	---	---
MIF	0.19	---	---	---	---
TNFRSF9	0.083	---	---	---	---
IFNG	0.001	1	0	1,000 to 1,000	0.0027
NKG7	0.002	0.9778	0.03443	0,9103 to 1,000	0.0041
CD38	0.002	0.9778	0.03443	0,9103 to 1,000	0.0041
CXCL9	0.004	0.9556	0.05443	0,8489 to 1,000	0.0063
IL2RB	0.004	0.9556	0.05362	0,8505 to 1,000	0.0063
GZMB	0.007	0.9333	0.0712	0,7938 to 1,000	0.0093
IDO1	0.007	0.9333	0.06609	0,8038 to 1,000	0.0093
GNLY	0.007	0.9333	0.06609	0,8038 to 1,000	0.0093
NCR1	0.007	0.9333	0.0712	0,7938 to 1,000	0.0093
CDK1	0.012	0.9111	0.09108	0,7326 to 1,000	0.0136
FASLG	0.012	0.9111	0.07978	0,7547 to 1,000	0.0136
CXCL10	0.012	0.9111	0.07923	0,7558 to 1,000	0.0136
ARG1	0.019	0.8889	0.1169	0,6598 to 1,000	0.0196
TNFSF18	0.029	0.8667	0.1023	0,6661 to 1,000	0.0278
CXCL13	0.029	0.8667	0.1023	0,6661 to 1,000	0.0278
KIR2DL3	0.042	0.8333	0.1102	0,6174 to 1,000	0.0455

## Sheet: Table S5
Supplementary Table S5. DESeq2 results: post-treatment samples, differences by pathological response (CPR vs non-CPR)
	baseMean	log2FoldChange	|log2FoldChange|	FC >= 1,5	FC >= 2	lfcSE	stat	pvalue	padj	minus_log10_pvalue
MAGEA3	13.6186	-23.7182	23.7182	1	1	2.28569	-10.3768	3.16104e-25	1.22332e-22	24.5002
BUB1	901.927	-3.40208	3.40208	1	1	0.498783	-6.82075	9.05643e-12	1.75242e-09	11.043
CDK1	1375.43	-3.33115	3.33115	1	1	0.516127	-6.45413	1.08839e-10	1.40402e-08	9.96322
CDKN3	1309.19	-4.15569	4.15569	1	1	0.652635	-6.36755	1.92074e-10	1.85832e-08	9.71653
CDKN2A	878.751	-2.59054	2.59054	1	1	0.421043	-6.15269	7.61803e-10	5.89636e-08	9.11816
CCNB2	799.821	-4.07702	4.07702	1	1	0.694033	-5.87439	4.24399e-09	2.73737e-07	8.37223
G6PD	3620.85	-2.0606	2.0606	1	1	0.360888	-5.7098	1.13111e-08	6.2534e-07	7.9465
KIAA0101	604.998	-3.68936	3.68936	1	1	0.654967	-5.63289	1.77212e-08	8.57263e-07	7.75151
MKI67	841.066	-3.48116	3.48116	1	1	0.630501	-5.52126	3.36579e-08	1.44729e-06	7.47291
ISG15	3345.46	-2.04898	2.04898	1	1	0.375582	-5.45548	4.88413e-08	1.89016e-06	7.31121
MIF	8493.47	-1.34211	1.34211	0	0	0.255536	-5.25213	1.50353e-07	5.28969e-06	6.82289
TOP2A	1050.06	-2.98223	2.98223	1	1	0.571801	-5.2155	1.83319e-07	5.91203e-06	6.73679
FOXM1	402.765	-2.70749	2.70749	1	1	0.568121	-4.76569	1.88207e-06	5.60279e-05	5.72536
HMBS	585.315	-1.84494	1.84494	1	0	0.393133	-4.69292	2.69331e-06	7.44509e-05	5.56971
IL7R	8617.54	1.15399	1.15399	0	0	0.263223	4.38408	1.16475e-05	0.000300505	4.93377
MELK	645.457	-2.64021	2.64021	1	1	0.637802	-4.13955	3.47992e-05	0.000841706	4.45843
TNFRSF18	599.956	-1.98271	1.98271	1	0	0.528392	-3.75234	0.000175188	0.00398811	3.7565
PGF	563.908	-1.25706	1.25706	0	0	0.341868	-3.67702	0.000235973	0.00507342	3.62714
PYGL	3108.43	-0.901853	0.901853	0	0	0.250998	-3.59307	0.00032681	0.0066566	3.4857
S100A9	5664.75	-1.43955	1.43955	0	0	0.404727	-3.55684	0.000375349	0.007263	3.42557
S100A8	5830.55	-1.48707	1.48707	0	0	0.429612	-3.46142	0.000537334	0.00990229	3.26976
EFNA4	429.744	-1.33202	1.33202	0	0	0.390239	-3.41334	0.000641721	0.0109667	3.19265
IFI6	5885.67	-0.748106	0.748106	0	0	0.219897	-3.40207	0.000668773	0.0109667	3.17472
STAT1	9789.36	-0.884143	0.884143	0	0	0.260952	-3.38815	0.000703654	0.0109667	3.15264
TWIST1	471.685	-1.57004	1.57004	1	0	0.463645	-3.38629	0.000708446	0.0109667	3.14969
MAD2L1	1050.19	-1.56665	1.56665	1	0	0.468261	-3.34568	0.000820825	0.0122177	3.08575
PTK7	5612.68	-0.950779	0.950779	0	0	0.285894	-3.32564	0.000882164	0.0126443	3.05445
KLRD1	944.898	0.801793	0.801793	0	0	0.243157	3.29743	0.000975749	0.0132658	3.01066
KRT5	1931.45	-2.10144	2.10144	1	1	0.63831	-3.2922	0.000994075	0.0132658	3.00258
MRC1	10450.2	0.854943	0.854943	0	0	0.262531	3.25654	0.0011278	0.0145486	2.94777
CEACAM1	315.858	-1.70741	1.70741	1	0	0.530118	-3.22081	0.00127828	0.0159579	2.89337
CXCL10	1879.04	-0.911345	0.911345	0	0	0.286103	-3.18537	0.00144571	0.017484	2.83992
BRCA1	263.207	-1.76139	1.76139	1	0	0.568754	-3.09693	0.00195535	0.0229309	2.70878
DGAT2	259.718	-1.52925	1.52925	1	0	0.495763	-3.08463	0.00203805	0.0231978	2.69079
KLRK1	3581.53	0.823369	0.823369	0	0	0.268877	3.06224	0.00219684	0.0242907	2.6582
CXCL8	9628.64	-1.55456	1.55456	1	0	0.522143	-2.97726	0.00290834	0.0312646	2.53636
CCL22	438.966	-0.973437	0.973437	0	0	0.335891	-2.89807	0.00375461	0.0382377	2.42544
NECTIN2	512.637	-0.986868	0.986868	0	0	0.340268	-2.90026	0.00372849	0.0382377	2.42847
HIF1A	7552.82	-0.746321	0.746321	0	0	0.274962	-2.71427	0.00664221	0.0627714	2.17769
IL15	419.043	0.881157	0.881157	0	0	0.327318	2.69205	0.00710134	0.0627714	2.14866
LAG3	503.829	-0.815476	0.815476	0	0	0.303071	-2.69071	0.00712997	0.0627714	2.14691
OAS2	3342.16	-0.745643	0.745643	0	0	0.27715	-2.69039	0.0071368	0.0627714	2.1465
TUBB	16381.6	-0.753281	0.753281	0	0	0.279544	-2.69468	0.00704567	0.0627714	2.15208
VCAM1	2776.23	-1.05005	1.05005	0	0	0.38657	-2.71632	0.0066012	0.0627714	2.18038
CD52	34726.9	0.602289	0.602289	0	0	0.228241	2.63883	0.0083192	0.0715451	2.07992
TBX21	408.065	0.816805	0.816805	0	0	0.313212	2.60783	0.00911177	0.0766577	2.0404
CA4	2190.89	1.56135	1.56135	1	0	0.609544	2.5615	0.0104222	0.0840288	1.98204
CCL20	2203.2	1.51681	1.51681	1	0	0.591632	2.56378	0.010354	0.0840288	1.98489
MX1	4282.31	-0.831517	0.831517	0	0	0.330575	-2.51536	0.011891	0.0939143	1.92478
HERC6	647.984	-0.751972	0.751972	0	0	0.30174	-2.49212	0.0126983	0.0982845	1.89626
TARP	1231.84	0.811733	0.811733	0	0	0.331853	2.44606	0.0144426	0.109594	1.84035
GAGE10	8.90546	4.58024	4.58024	1	1	1.91897	2.38683	0.0169946	0.126479	1.76969
HLA-E	85648.3	0.393831	0.393831	0	0	0.165575	2.37856	0.0173804	0.12691	1.75994
HLA-DOA	2111.78	0.469364	0.469364	0	0	0.198979	2.35886	0.018331	0.131372	1.73681
DDX58	4436.15	-0.684444	0.684444	0	0	0.294692	-2.32258	0.020202	0.142148	1.69461
MAGEA12	6.63562	-6.57706	6.57706	1	1	2.87311	-2.28918	0.0220691	0.152513	1.65622
GADD45GIP1	5941.89	-0.503217	0.503217	0	0	0.225399	-2.23256	0.0255782	0.172667	1.59213
M6PR	9794.64	-0.458522	0.458522	0	0	0.205796	-2.22804	0.0258777	0.172667	1.58707
TAP1	6050.23	-0.421843	0.421843	0	0	0.191419	-2.20376	0.0275412	0.180652	1.56002
CXCR4	22107.2	0.573039	0.573039	0	0	0.262272	2.1849	0.0288962	0.183325	1.53916
IFI35	1498.12	-0.493839	0.493839	0	0	0.225454	-2.19042	0.028494	0.183325	1.54525
CXCL9	4559.82	-0.894167	0.894167	0	0	0.413723	-2.16127	0.0306744	0.191467	1.51322
IFIT3	788.664	-0.776943	0.776943	0	0	0.363346	-2.1383	0.0324926	0.199597	1.48822
IFI44L	1558.23	-0.691319	0.691319	0	0	0.32879	-2.10261	0.0354998	0.21136	1.44977
XAGE1B	443.249	1.16696	1.16696	0	0	0.554441	2.10475	0.0353127	0.21136	1.45207
STAT4	550.499	0.979142	0.979142	0	0	0.474294	2.06442	0.0389778	0.228552	1.40918
CCL4	9069.74	0.526631	0.526631	0	0	0.25646	2.05346	0.040028	0.231207	1.39764
ALOX15B	1585.32	0.915217	0.915217	0	0	0.44871	2.03967	0.0413836	0.232108	1.38317
TBP	1238.92	-0.565587	0.565587	0	0	0.277163	-2.04063	0.0412877	0.232108	1.38418
CXCL13	3828.59	-0.977414	0.977414	0	0	0.484139	-2.01887	0.0435006	0.240496	1.3615
CXCL11	401.348	-0.876901	0.876901	0	0	0.436249	-2.01009	0.0444215	0.242129	1.35241
OAS1	1971.04	-0.493064	0.493064	0	0	0.246291	-2.00196	0.0452894	0.243431	1.344
CD1C	1621.22	0.640687	0.640687	0	0	0.329972	1.94164	0.0521805	0.251207	1.28249
CD22	1241.34	0.819042	0.819042	0	0	0.419608	1.95192	0.0509477	0.251207	1.29288
CD33	1101.92	0.517045	0.517045	0	0	0.261059	1.98057	0.0476395	0.251207	1.32203
IL3RA	1031.76	0.498956	0.498956	0	0	0.258116	1.93307	0.0532272	0.251207	1.27387
PRF1	825.5	0.477167	0.477167	0	0	0.245483	1.94379	0.0519208	0.251207	1.28466
PTPRC	2784.74	0.497978	0.497978	0	0	0.252551	1.97179	0.0486332	0.251207	1.31307
RPS6	88376.9	-0.442916	0.442916	0	0	0.229006	-1.93408	0.0531033	0.251207	1.27488
STAT3	17410.5	-0.378519	0.378519	0	0	0.195261	-1.93853	0.0525591	0.251207	1.27935
TNFRSF9	533.193	-0.971437	0.971437	0	0	0.502196	-1.93438	0.0530667	0.251207	1.27518
ZAP70	650.539	0.867361	0.867361	0	0	0.442586	1.95976	0.0500241	0.251207	1.30082
CD37	6924.05	0.482287	0.482287	0	0	0.250609	1.92446	0.0542972	0.252902	1.26522
IFI27	3741.31	-0.581226	0.581226	0	0	0.302766	-1.91972	0.0548935	0.252902	1.26048
NT5E	844.642	-0.423759	0.423759	0	0	0.22408	-1.89111	0.0586103	0.266849	1.23203
CD63	36771.2	-0.395041	0.395041	0	0	0.209579	-1.88493	0.0594399	0.267479	1.22592
LAMP1	2222.54	-0.446556	0.446556	0	0	0.240169	-1.85934	0.0629788	0.276964	1.20081
MTOR	2390.14	-0.507402	0.507402	0	0	0.272791	-1.86004	0.06288	0.276964	1.20149
IL10RA	5074.96	0.314715	0.314715	0	0	0.173059	1.81854	0.0689816	0.299954	1.16127
CD83	3105.12	0.523522	0.523522	0	0	0.291425	1.79642	0.072427	0.308014	1.1401
ITK	1370.65	0.652845	0.652845	0	0	0.362467	1.80112	0.0716846	0.308014	1.14457
CD86	929.437	-0.452148	0.452148	0	0	0.253012	-1.78706	0.0739276	0.309191	1.13119
PTPN11	8419.06	-0.508911	0.508911	0	0	0.285144	-1.78475	0.0743018	0.309191	1.129
GRAP2	969.44	0.460794	0.460794	0	0	0.25898	1.77927	0.0751958	0.309583	1.12381
CD276	929.824	-0.548716	0.548716	0	0	0.311853	-1.75954	0.0784862	0.315335	1.10521
GUSB	4535.55	-0.330082	0.330082	0	0	0.187419	-1.7612	0.078205	0.315335	1.10677
IFNG	98.0251	-1.00873	1.00873	0	0	0.574349	-1.7563	0.0790375	0.315335	1.10217
HLA-DMA	13006.5	0.307062	0.307062	0	0	0.176255	1.74215	0.0814828	0.321774	1.08893
C10orf54	3465.44	0.311004	0.311004	0	0	0.180185	1.72603	0.0843427	0.329703	1.07395
ADGRE5	11447.7	0.386882	0.386882	0	0	0.225623	1.71473	0.0863951	0.33359	1.06351
LAMP3	3354.51	0.686663	0.686663	0	0	0.401297	1.71111	0.0870609	0.33359	1.06018
SAMHD1	7213.88	0.383968	0.383968	0	0	0.225744	1.7009	0.0889614	0.33753	1.0508
FCGR3B	769.199	-0.893646	0.893646	0	0	0.531085	-1.68268	0.0924369	0.347248	1.03415
TFRC	7040.72	-0.540208	0.540208	0	0	0.321907	-1.67815	0.0933174	0.347248	1.03004
VTCN1	17.2354	-2.01499	2.01499	1	1	1.23334	-1.63376	0.102308	0.377079	0.990089
TAGAP	2184.84	0.419828	0.419828	0	0	0.258136	1.62638	0.103868	0.379217	0.983517
GZMH	974.83	0.415356	0.415356	0	0	0.258135	1.60907	0.107602	0.385574	0.96818
TDO2	551.236	-0.598013	0.598013	0	0	0.370665	-1.61335	0.106668	0.385574	0.971966
BRCA2	510.23	-0.783203	0.783203	0	0	0.491824	-1.59244	0.111285	0.395112	0.953564
MYC	6739.25	-0.543232	0.543232	0	0	0.344847	-1.57528	0.115191	0.401611	0.938582
NTN3	64.3997	-1.06716	1.06716	0	0	0.676228	-1.57811	0.11454	0.401611	0.941045
CD14	9282.97	-0.347306	0.347306	0	0	0.221222	-1.56995	0.116428	0.4023	0.933943
CD40LG	270.354	0.750301	0.750301	0	0	0.479666	1.56422	0.117767	0.403325	0.928977
CD209	1111.9	-0.704379	0.704379	0	0	0.453313	-1.55385	0.120221	0.406069	0.920019
FYB	6158.68	0.316632	0.316632	0	0	0.204018	1.55198	0.120667	0.406069	0.918413
NOTCH3	7102.86	-0.41459	0.41459	0	0	0.268895	-1.54183	0.123115	0.410737	0.909689
MAPK1	5562.91	-0.322119	0.322119	0	0	0.21039	-1.53106	0.125756	0.415961	0.900472
CD226	1107.69	0.521443	0.521443	0	0	0.343465	1.51818	0.128968	0.422529	0.889518
MMP2	50200.2	-0.395819	0.395819	0	0	0.26137	-1.5144	0.129925	0.422529	0.886308
FAS	2878.11	0.45529	0.45529	0	0	0.303887	1.49822	0.134076	0.432395	0.872649
MAPK14	3209.97	0.210437	0.210437	0	0	0.141491	1.48728	0.13694	0.43798	0.863471
CCL21	7630.37	-0.414725	0.414725	0	0	0.285632	-1.45196	0.146513	0.462461	0.834122
EGFR	5677.91	-0.366057	0.366057	0	0	0.25252	-1.44962	0.147166	0.462461	0.832193
MS4A1	682.182	0.63514	0.63514	0	0	0.439241	1.446	0.148179	0.462461	0.829215
CD69	2579.03	0.346418	0.346418	0	0	0.240589	1.43988	0.149903	0.463625	0.824191
CD74	16138.2	0.348716	0.348716	0	0	0.242806	1.43619	0.150948	0.463625	0.821173
TNF	147.267	0.56852	0.56852	0	0	0.397534	1.43012	0.152684	0.465265	0.816207
IL1A	96.805	-1.20487	1.20487	0	0	0.849853	-1.41773	0.156268	0.465934	0.806129
LYZ	78856	0.408696	0.408696	0	0	0.287667	1.42073	0.155396	0.465934	0.80856
MAGEC2	1.31663	-4.25031	4.25031	1	1	2.99975	-1.41689	0.156515	0.465934	0.805443
CD48	1492.67	0.352267	0.352267	0	0	0.251575	1.40025	0.161439	0.47361	0.791992
PDCD1LG2	885.728	0.345119	0.345119	0	0	0.246531	1.39991	0.161542	0.47361	0.791716
HLA-DQB2	212.126	0.674973	0.674973	0	0	0.484268	1.3938	0.163378	0.475392	0.786807
EIF2AK2	5223.02	-0.244962	0.244962	0	0	0.176634	-1.38683	0.165492	0.477952	0.781222
ABCF1	6441.37	-0.391373	0.391373	0	0	0.284197	-1.37712	0.168476	0.482964	0.773463
RORC	1195.56	-0.647732	0.647732	0	0	0.47391	-1.36678	0.171693	0.488569	0.765246
KRT7	8589.77	-0.619204	0.619204	0	0	0.455058	-1.36071	0.173604	0.490399	0.760441
CD247	1029.43	0.406144	0.406144	0	0	0.299413	1.35647	0.17495	0.49062	0.757086
CD8A	3671.62	0.346221	0.346221	0	0	0.26142	1.32439	0.185375	0.493262	0.73195
CD8B	1052.34	0.358912	0.358912	0	0	0.270434	1.32717	0.184453	0.493262	0.734114
CRTAM	372.765	0.60584	0.60584	0	0	0.455825	1.32911	0.183812	0.493262	0.735625
HLA-DPB1	37137.2	0.263614	0.263614	0	0	0.19937	1.32224	0.186089	0.493262	0.73028
IFITM1	16868.7	-0.262335	0.262335	0	0	0.196952	-1.33198	0.182867	0.493262	0.737863
IGSF6	1634.17	0.382288	0.382288	0	0	0.28445	1.34395	0.178964	0.493262	0.747235
IL6	2043.39	-0.692607	0.692607	0	0	0.523319	-1.32349	0.185673	0.493262	0.731251
TNFSF9	124.71	-0.65788	0.65788	0	0	0.493132	-1.33408	0.182176	0.493262	0.739508
ITGA1	7050.37	0.419212	0.419212	0	0	0.320347	1.30862	0.190664	0.501952	0.719731
HLA-C	15291.3	-0.710445	0.710445	0	0	0.54901	-1.29405	0.195649	0.508162	0.708522
ITGB1	36382.6	-0.321016	0.321016	0	0	0.247963	-1.29461	0.195453	0.508162	0.708957
TNFRSF4	350.266	-0.583838	0.583838	0	0	0.453923	-1.28621	0.198371	0.511798	0.702521
BTLA	612.261	0.486403	0.486403	0	0	0.379969	1.28011	0.200505	0.513878	0.697874
GNLY	2694.59	0.580165	0.580165	0	0	0.457011	1.26948	0.204271	0.51702	0.689794
IFIT1	1247	-0.527333	0.527333	0	0	0.416742	-1.26537	0.205739	0.51702	0.686683
LRG1	517.067	-0.464144	0.464144	0	0	0.366438	-1.26664	0.205285	0.51702	0.687642
CCL5	8259.78	0.330624	0.330624	0	0	0.266113	1.24242	0.214082	0.521068	0.66942
CD68	27848.4	0.272011	0.272011	0	0	0.218339	1.24582	0.212829	0.521068	0.671968
CIITA	9129.53	0.301569	0.301569	0	0	0.240805	1.25234	0.210447	0.521068	0.676856
NKG7	5922.04	0.292236	0.292236	0	0	0.232892	1.25481	0.209546	0.521068	0.678721
TYROBP	82789.6	0.313968	0.313968	0	0	0.252206	1.24489	0.213173	0.521068	0.671267
CD3E	6032.18	0.233485	0.233485	0	0	0.189983	1.22898	0.219079	0.529898	0.659399
CD40	1006.9	-0.340167	0.340167	0	0	0.279964	-1.21504	0.224351	0.536041	0.649071
ID2	13978.2	-0.403645	0.403645	0	0	0.332234	-1.21494	0.224389	0.536041	0.648998
EGR3	3806.79	-0.516867	0.516867	0	0	0.426797	-1.21104	0.225881	0.536294	0.64612
CCL2	21594.5	-0.654541	0.654541	0	0	0.545776	-1.19928	0.230417	0.538089	0.637485
FOXP3	199.949	-0.748389	0.748389	0	0	0.626417	-1.19471	0.232199	0.538089	0.63414
IFIH1	1318.05	-0.324653	0.324653	0	0	0.271574	-1.19545	0.231911	0.538089	0.634678
OAS3	1085.52	-0.376198	0.376198	0	0	0.312294	-1.20463	0.228347	0.538089	0.641405
IL2RG	3127.15	0.233027	0.233027	0	0	0.196398	1.1865	0.235424	0.542316	0.628149
CCR6	305.136	0.477924	0.477924	0	0	0.404186	1.18244	0.237033	0.542791	0.625191
GBP1	8223.47	-0.250891	0.250891	0	0	0.219735	-1.14179	0.253542	0.548162	0.595949
IFIT2	1797.37	-0.303679	0.303679	0	0	0.26311	-1.15419	0.248423	0.548162	0.604808
IKZF1	17414.1	0.338471	0.338471	0	0	0.294037	1.15112	0.249685	0.548162	0.602608
IKZF4	119.385	-0.798137	0.798137	0	0	0.690606	-1.15571	0.247802	0.548162	0.605896
IL18	1901.42	0.193963	0.193963	0	0	0.168241	1.15289	0.248954	0.548162	0.60388
IRF9	6398.91	-0.154468	0.154468	0	0	0.135278	-1.14185	0.253514	0.548162	0.595997
IRS1	4153.94	-0.408493	0.408493	0	0	0.351719	-1.16142	0.245472	0.548162	0.609998
JCHAIN	55089.3	0.467397	0.467397	0	0	0.408528	1.1441	0.252583	0.548162	0.597596
MADCAM1	84.346	-0.945414	0.945414	0	0	0.815604	-1.15916	0.246392	0.548162	0.608374
POLR2A	13793.7	-0.355413	0.355413	0	0	0.308101	-1.15356	0.248681	0.548162	0.604357
ITGAE	425.331	-0.391431	0.391431	0	0	0.357865	-1.0938	0.274044	0.589195	0.56218
BCL2L11	1146.95	-0.200412	0.200412	0	0	0.186114	-1.07683	0.281558	0.598698	0.550432
HLA-DRA	106895	0.208371	0.208371	0	0	0.192946	1.07994	0.280167	0.598698	0.552583
CMKLR1	7.50119	-1.64488	1.64488	1	0	1.53946	-1.06848	0.285304	0.603253	0.544693
EOMES	464.101	0.385565	0.385565	0	0	0.361989	1.06513	0.286818	0.603253	0.542394
IKZF2	254.002	-0.356799	0.356799	0	0	0.339126	-1.05211	0.292747	0.604103	0.533507
IL13	31.6693	-1.19433	1.19433	0	0	1.12729	-1.05947	0.289388	0.604103	0.53852
ITGAX	2661.4	0.285107	0.285107	0	0	0.271388	1.05055	0.293466	0.604103	0.532442
TNFRSF14	2938.79	0.191917	0.191917	0	0	0.182458	1.05184	0.292873	0.604103	0.533321
CD4	4234.96	0.191642	0.191642	0	0	0.185407	1.03363	0.301309	0.610506	0.520988
PMEL	43.5569	-0.973978	0.973978	0	0	0.941905	-1.03405	0.301112	0.610506	0.521272
PVR	3406.31	-0.342551	0.342551	0	0	0.331254	-1.03411	0.301087	0.610506	0.521308
SNAI2	1744.03	-0.351668	0.351668	0	0	0.347379	-1.01235	0.311373	0.625709	0.50672
TNFSF14	117.305	-1.16406	1.16406	0	0	1.15147	-1.01094	0.312046	0.625709	0.505781
CXCL1	8016.16	-0.49576	0.49576	0	0	0.496618	-0.998273	0.318147	0.634654	0.497372
BATF	2755.45	-0.241724	0.241724	0	0	0.245167	-0.985956	0.324155	0.639682	0.489247
GZMK	780.596	0.4018	0.4018	0	0	0.410643	0.978466	0.327844	0.639682	0.484333
NCR1	67.0563	0.551651	0.551651	0	0	0.565062	0.976267	0.328932	0.639682	0.482894
PECAM1	5511.99	-0.421627	0.421627	0	0	0.429191	-0.982375	0.325915	0.639682	0.486895
SNAI1	590.8	-0.395039	0.395039	0	0	0.399278	-0.989384	0.322475	0.639682	0.491504
CLEC4C	77.4463	-0.911892	0.911892	0	0	0.953048	-0.956816	0.33866	0.645623	0.470236
GZMB	1845.61	-0.286764	0.286764	0	0	0.297536	-0.963797	0.335148	0.645623	0.474764
LAPTM5	19941.4	0.217836	0.217836	0	0	0.226938	0.95989	0.337111	0.645623	0.472228
SH2D1B	115.836	0.558432	0.558432	0	0	0.582321	0.958977	0.33757	0.645623	0.471636
LCK	4.9583	1.02257	1.02257	0	0	1.07506	0.951182	0.341512	0.647868	0.466594
HLA-DRB1	136012	0.370194	0.370194	0	0	0.400623	0.924045	0.355463	0.661366	0.449206
HLA-G	24.3646	0.953892	0.953892	0	0	1.02437	0.931202	0.351749	0.661366	0.453767
KREMEN1	880.298	-0.247556	0.247556	0	0	0.266801	-0.927867	0.353477	0.661366	0.451639
LY9	160.834	0.632002	0.632002	0	0	0.683469	0.924697	0.355123	0.661366	0.449621
CD47	9847.64	0.187845	0.187845	0	0	0.20489	0.916811	0.359242	0.665198	0.444613
CCR5	2484.58	0.214982	0.214982	0	0	0.236835	0.907727	0.364023	0.670842	0.438872
ADORA2A	681.015	0.258529	0.258529	0	0	0.286454	0.902516	0.366783	0.672725	0.435591
FCGR1A	1013.61	-0.349657	0.349657	0	0	0.391659	-0.89276	0.371986	0.67905	0.429474
CD6	923.422	0.22067	0.22067	0	0	0.251113	0.878766	0.379528	0.686343	0.420756
IL2RA	489.419	-0.354284	0.354284	0	0	0.40184	-0.881656	0.377963	0.686343	0.422551
CEACAM8	32.2639	0.998257	0.998257	0	0	1.14024	0.875481	0.381312	0.686362	0.418719
FCGR3A	4246.41	-0.229813	0.229813	0	0	0.263579	-0.871892	0.383267	0.686687	0.416498
CCL17	836.922	-0.318693	0.318693	0	0	0.368697	-0.864378	0.38738	0.690858	0.411862
FUT4	2921.71	-0.309344	0.309344	0	0	0.365642	-0.84603	0.397536	0.705717	0.400624
IL21	11.9917	-1.46188	1.46188	0	0	1.75739	-0.831848	0.405495	0.71656	0.392015
CCR1	1118	-0.281508	0.281508	0	0	0.34541	-0.814997	0.415074	0.723202	0.381875
CD80	1898.61	0.319188	0.319188	0	0	0.396036	0.805955	0.420269	0.723202	0.376473
HLA-DQA1	8080.71	0.371669	0.371669	0	0	0.456805	0.813628	0.415858	0.723202	0.381055
HLA-F-AS1	25.7079	-0.588969	0.588969	0	0	0.725403	-0.81192	0.416838	0.723202	0.380033
PTGS2	2735.24	-0.326145	0.326145	0	0	0.404841	-0.805613	0.420466	0.723202	0.376269
TP63	115.879	-0.588382	0.588382	0	0	0.720762	-0.816333	0.41431	0.723202	0.382675
HGF	852.588	0.21322	0.21322	0	0	0.267483	0.797134	0.425373	0.725196	0.37123
TRIM29	489.502	-0.510791	0.510791	0	0	0.638325	-0.800205	0.423592	0.725196	0.373052
CCR4	643.047	0.221387	0.221387	0	0	0.285043	0.776678	0.437349	0.737629	0.359172
CD3G	3241.99	0.205962	0.205962	0	0	0.265784	0.774925	0.438384	0.737629	0.358145
HLA-DOB	1791.19	0.303307	0.303307	0	0	0.390291	0.777131	0.437081	0.737629	0.359438
CD38	1564.16	-0.292968	0.292968	0	0	0.389684	-0.751809	0.452166	0.738347	0.344702
CD53	544.4	0.473642	0.473642	0	0	0.626844	0.755597	0.449891	0.738347	0.346893
CD79A	7581.61	0.312896	0.312896	0	0	0.413491	0.756716	0.44922	0.738347	0.347541
FOXO1	7600.58	0.177255	0.177255	0	0	0.234001	0.757497	0.448752	0.738347	0.347993
IL2RB	1752.76	-0.214334	0.214334	0	0	0.27825	-0.770291	0.441127	0.738347	0.355436
KLF2	11453.8	0.239837	0.239837	0	0	0.317736	0.754833	0.450349	0.738347	0.346451
NFATC1	479.335	0.255313	0.255313	0	0	0.335225	0.761616	0.44629	0.738347	0.350383
IFNB1	800.561	-0.395857	0.395857	0	0	0.532874	-0.742871	0.45756	0.739687	0.339552
IL22	0.540974	2.24227	2.24227	1	1	3.02619	0.740955	0.458721	0.739687	0.338452
IL7	200.716	0.334138	0.334138	0	0	0.447607	0.7465	0.455365	0.739687	0.34164
SLAMF8	1572.34	-0.163233	0.163233	0	0	0.224737	-0.726332	0.467635	0.750933	0.330093
CD19	399.862	-0.292153	0.292153	0	0	0.412017	-0.709079	0.478275	0.764845	0.320322
SDHA	4224.39	-0.105983	0.105983	0	0	0.151003	-0.701862	0.482765	0.768849	0.316264
KIR2DL3	27.021	0.665281	0.665281	0	0	0.966351	0.688446	0.491172	0.779031	0.308766
CTAG2	2.63136	1.48101	1.48101	0	0	2.20835	0.670641	0.502449	0.790439	0.298908
ZBTB46	276.634	0.16763	0.16763	0	0	0.248829	0.673677	0.500517	0.790439	0.300581
SLAMF7	9224.09	-0.227495	0.227495	0	0	0.341371	-0.666418	0.505144	0.791461	0.296585
BST2	16738.6	-0.108428	0.108428	0	0	0.166683	-0.650507	0.515365	0.792131	0.287885
KLRG1	789.044	0.276994	0.276994	0	0	0.427976	0.647218	0.517491	0.792131	0.286097
LILRB2	846.45	-0.165557	0.165557	0	0	0.254431	-0.650696	0.515243	0.792131	0.287988
PSMB9	2580.52	-0.145421	0.145421	0	0	0.224881	-0.646658	0.517853	0.792131	0.285793
TCF7	1219.82	0.181021	0.181021	0	0	0.273902	0.660896	0.508679	0.792131	0.293556
ZEB1	2999.05	0.204195	0.204195	0	0	0.310349	0.657954	0.510568	0.792131	0.291946
CD3D	2929.68	0.175722	0.175722	0	0	0.278846	0.630177	0.528578	0.795953	0.276891
CSF1R	1808.73	-0.116509	0.116509	0	0	0.182666	-0.637824	0.523588	0.795953	0.28101
NCAM1	477.605	0.331126	0.331126	0	0	0.52542	0.630212	0.528556	0.795953	0.276909
NOS2	6.48277	-1.49283	1.49283	0	0	2.34735	-0.635963	0.5248	0.795953	0.280006
PDCD1	492.889	-0.18143	0.18143	0	0	0.293733	-0.617671	0.536792	0.805189	0.270194
CTSS	11312.3	-0.120124	0.120124	0	0	0.196152	-0.612401	0.540273	0.80728	0.267387
IL10	188.451	-0.316304	0.316304	0	0	0.530104	-0.596683	0.550719	0.819724	0.25907
FCGR2B	480.573	0.243492	0.243492	0	0	0.421665	0.577452	0.563634	0.835733	0.249003
CD163	7435.64	0.141597	0.141597	0	0	0.248875	0.568948	0.569391	0.836478	0.244589
HLA-F	690.929	0.109727	0.109727	0	0	0.192392	0.570333	0.568452	0.836478	0.245306
IFNA17	1551.84	-0.315051	0.315051	0	0	0.555511	-0.567137	0.570621	0.836478	0.243652
ITGAL	2403.47	0.196017	0.196017	0	0	0.350742	0.558864	0.576254	0.838385	0.239386
TNFSF4	87.2987	-0.204157	0.204157	0	0	0.365004	-0.559328	0.575938	0.838385	0.239625
ENTPD1	2589.53	0.112898	0.112898	0	0	0.206401	0.546982	0.584391	0.844088	0.233296
IFITM2	14119.6	-0.122912	0.122912	0	0	0.224797	-0.54677	0.584536	0.844088	0.233188
C1QA	22078.5	0.107489	0.107489	0	0	0.197776	0.543487	0.586794	0.844199	0.231514
HLA-DMB	801.47	-0.469171	0.469171	0	0	0.871906	-0.538098	0.59051	0.846397	0.228773
PTPRCAP	27.2854	-0.421627	0.421627	0	0	0.812985	-0.518616	0.604029	0.861557	0.218942
VEGFA	16897.3	-0.181804	0.181804	0	0	0.352025	-0.516451	0.605539	0.861557	0.217858
TLR8	458.423	-0.232409	0.232409	0	0	0.453012	-0.51303	0.60793	0.861791	0.216146
C1QB	48947.1	0.13128	0.13128	0	0	0.266444	0.492713	0.622215	0.866178	0.206059
CD70	71.8358	0.309963	0.309963	0	0	0.62296	0.497566	0.61879	0.866178	0.208457
CTLA4	378.849	-0.208953	0.208953	0	0	0.422219	-0.494892	0.620676	0.866178	0.207135
MAGEA4	0.155059	-1.52175	1.52175	1	0	3.03283	-0.501759	0.615837	0.866178	0.210534
TNFSF18	57.2703	-0.397655	0.397655	0	0	0.805118	-0.493909	0.62137	0.866178	0.206649
ARG1	22.8575	-0.694739	0.694739	0	0	1.51365	-0.458983	0.646247	0.870863	0.189602
BCL6	9336.83	-0.112548	0.112548	0	0	0.238673	-0.471558	0.637242	0.870863	0.195695
CCL3	1255.94	0.178986	0.178986	0	0	0.375851	0.476214	0.633922	0.870863	0.197964
DMBT1	6362.35	0.278713	0.278713	0	0	0.581091	0.479638	0.631485	0.870863	0.199637
GAGE1	0.297909	1.38561	1.38561	0	0	3.03578	0.456426	0.648084	0.870863	0.188369
IL12A	161.768	0.306301	0.306301	0	0	0.635003	0.482361	0.629549	0.870863	0.20097
ITGB2	5356.33	0.114314	0.114314	0	0	0.247323	0.462204	0.643935	0.870863	0.191158
ITGB7	1073.48	-0.159386	0.159386	0	0	0.345902	-0.460782	0.644955	0.870863	0.190471
PIK3CD	1600.53	0.139405	0.139405	0	0	0.298714	0.466684	0.640726	0.870863	0.193328
TLR3	581.027	0.213357	0.213357	0	0	0.4627	0.461114	0.644717	0.870863	0.190631
CCL18	9640.6	0.148485	0.148485	0	0	0.332644	0.446378	0.655325	0.871514	0.183544
IL17A	5.61783	-1.3412	1.3412	0	0	2.96746	-0.451968	0.651292	0.871514	0.186224
LCN2	9641.76	-0.217244	0.217244	0	0	0.484072	-0.448783	0.653588	0.871514	0.184696
IRF4	1256.18	-0.212193	0.212193	0	0	0.485749	-0.436837	0.662229	0.874685	0.178992
NCF1	4666.32	0.127046	0.127046	0	0	0.290272	0.437678	0.661619	0.874685	0.179392
RB1	4580.03	0.128778	0.128778	0	0	0.303634	0.424121	0.671477	0.880887	0.172969
TLR7	448.905	0.198312	0.198312	0	0	0.465581	0.425946	0.670147	0.880887	0.17383
CXCR2	1018.12	-0.20781	0.20781	0	0	0.501361	-0.414492	0.678514	0.887111	0.168441
CD244	242.163	0.186987	0.186987	0	0	0.496225	0.376818	0.706309	0.894444	0.151005
CORO1A	3569.64	-0.0982843	0.0982843	0	0	0.26568	-0.369934	0.711431	0.894444	0.147867
IGF1R	11366.3	-0.0890665	0.0890665	0	0	0.235508	-0.378189	0.70529	0.894444	0.151632
IL1B	1092.28	0.164434	0.164434	0	0	0.421901	0.389747	0.696724	0.894444	0.156939
IRF1	4184.21	0.0832955	0.0832955	0	0	0.215975	0.385672	0.699739	0.894444	0.155064
KLRB1	2149.56	0.113348	0.113348	0	0	0.298357	0.379908	0.704014	0.894444	0.152419
NCR3	180.824	0.222036	0.222036	0	0	0.590351	0.376109	0.706836	0.894444	0.150682
NFKBIA	21399.8	0.108912	0.108912	0	0	0.270269	0.402977	0.686965	0.894444	0.163065
PIK3CA	1999.29	-0.0781425	0.0781425	0	0	0.197436	-0.395786	0.692263	0.894444	0.159729
PRDM1	4527.47	-0.0959256	0.0959256	0	0	0.247317	-0.387865	0.698116	0.894444	0.156072
PTEN	13664.3	-0.124728	0.124728	0	0	0.337684	-0.369363	0.711857	0.894444	0.147607
TNFAIP8	1238.62	-0.0853475	0.0853475	0	0	0.229365	-0.372103	0.709816	0.894444	0.148854
CCR2	493.451	0.126072	0.126072	0	0	0.353482	0.356659	0.721347	0.894671	0.141855
CXCR3	22.1215	-0.26626	0.26626	0	0	0.750161	-0.354937	0.722637	0.894671	0.14108
GATA3	553.923	0.0834184	0.0834184	0	0	0.235875	0.353656	0.723597	0.894671	0.140503
HLA-DPA1	90978.3	0.143667	0.143667	0	0	0.399402	0.359705	0.719068	0.894671	0.14323
LILRB1	373.618	0.14577	0.14577	0	0	0.399218	0.365138	0.715008	0.894671	0.145689
EBI3	284.07	-0.145236	0.145236	0	0	0.418248	-0.347248	0.728405	0.894898	0.137627
NRP1	9685.93	0.0761176	0.0761176	0	0	0.218869	0.347777	0.728008	0.894898	0.137864
CD79B	575.724	-0.10929	0.10929	0	0	0.331752	-0.329434	0.741828	0.897019	0.129697
CXCR6	589.963	-0.143115	0.143115	0	0	0.439793	-0.325415	0.744867	0.897019	0.127921
EGR2	3704.02	-0.0957577	0.0957577	0	0	0.292283	-0.327619	0.7432	0.897019	0.128895
FCRLA	411.796	-0.204114	0.204114	0	0	0.643183	-0.31735	0.750978	0.897019	0.124373
IDO2	6.39083	0.533064	0.533064	0	0	1.57378	0.338715	0.734824	0.897019	0.133817
LST1	990.747	0.0922335	0.0922335	0	0	0.289788	0.318279	0.750273	0.897019	0.124781
SELL	442.276	0.084248	0.084248	0	0	0.26549	0.317331	0.750993	0.897019	0.124364
SIT1	498.315	0.139519	0.139519	0	0	0.415406	0.335861	0.736976	0.897019	0.132547
TIGIT	528.976	-0.153287	0.153287	0	0	0.460758	-0.332685	0.739372	0.897019	0.131137
CD44	194.13	0.151541	0.151541	0	0	0.493248	0.30723	0.758669	0.903399	0.119948
CD274	522.224	0.109211	0.109211	0	0	0.364092	0.299953	0.764213	0.903492	0.116786
HLA-B	13169.1	-0.326019	0.326019	0	0	1.08455	-0.300604	0.763717	0.903492	0.117068
KIR2DL1	0.16364	0.905725	0.905725	0	0	3.03998	0.297938	0.765751	0.903492	0.115913
B3GAT1	81.3703	0.187771	0.187771	0	0	0.666705	0.281641	0.778219	0.905833	0.108898
CYBB	9099.03	0.0557704	0.0557704	0	0	0.199143	0.280052	0.779438	0.905833	0.108219
LRP1	14503.2	-0.0532184	0.0532184	0	0	0.186204	-0.285807	0.775026	0.905833	0.110684
MPO	80.6494	-0.198792	0.198792	0	0	0.687449	-0.289173	0.772449	0.905833	0.11213
POU2AF1	3370.63	0.105602	0.105602	0	0	0.370552	0.284985	0.775656	0.905833	0.110331
FASLG	238.856	-0.144007	0.144007	0	0	0.535037	-0.269154	0.787811	0.907551	0.103578
ITGAM	2489.9	0.070841	0.070841	0	0	0.263378	0.268971	0.787952	0.907551	0.1035
TNFSF13B	3535.83	-0.0746268	0.0746268	0	0	0.276063	-0.270325	0.78691	0.907551	0.104075
CBLB	4726.74	0.0816799	0.0816799	0	0	0.312348	0.261503	0.793704	0.908768	0.100341
ICAM1	14617.5	0.105613	0.105613	0	0	0.39955	0.26433	0.791526	0.908768	0.101535
CX3CR1	167.275	0.0936391	0.0936391	0	0	0.371684	0.251932	0.801094	0.909186	0.0963166
ISG20	2436.08	0.0606751	0.0606751	0	0	0.238364	0.254547	0.799073	0.909186	0.0974137
JAML	648.399	0.115096	0.115096	0	0	0.462488	0.248863	0.803466	0.909186	0.0950322
PTPN6	4889.31	0.0443451	0.0443451	0	0	0.176659	0.251021	0.801798	0.909186	0.0959352
HLA-A	21235.5	0.269468	0.269468	0	0	1.1047	0.243929	0.807286	0.910845	0.0929725
LEXM	25.0767	-0.370994	0.370994	0	0	1.58296	-0.234367	0.8147	0.916537	0.0890024
IKZF3	2362.37	-0.0629709	0.0629709	0	0	0.277219	-0.227153	0.820305	0.920168	0.0860246
ICOS	170.624	-0.119132	0.119132	0	0	0.531675	-0.224069	0.822704	0.920192	0.0847565
CD1D	111.415	0.101333	0.101333	0	0	0.482877	0.209852	0.833783	0.921926	0.0789468
CD27	991.311	0.0767653	0.0767653	0	0	0.363135	0.211396	0.832578	0.921926	0.0795749
CXCR5	252.342	-0.135824	0.135824	0	0	0.64488	-0.210619	0.833185	0.921926	0.0792587
LMNA	27701.6	0.0656963	0.0656963	0	0	0.30718	0.213869	0.830649	0.921926	0.0805823
CSF2RB	6284.34	0.0411945	0.0411945	0	0	0.205552	0.200409	0.841161	0.927434	0.075121
AKT1	4370.51	0.0349956	0.0349956	0	0	0.194001	0.180389	0.856847	0.927551	0.0670966
BCL2	1344.77	0.0474031	0.0474031	0	0	0.24796	0.191172	0.848391	0.927551	0.0714041
CCR7	942.949	0.0536656	0.0536656	0	0	0.288893	0.185763	0.852631	0.927551	0.069239
CD28	781.18	0.0596377	0.0596377	0	0	0.333893	0.178613	0.858241	0.927551	0.0663906
IL12B	12.4145	-0.353978	0.353978	0	0	1.99425	-0.177499	0.859117	0.927551	0.0659479
IL23A	22.3907	0.131969	0.131969	0	0	0.743902	0.177401	0.859193	0.927551	0.0659091
KLRF1	123.458	0.12232	0.12232	0	0	0.670205	0.182511	0.855181	0.927551	0.0679417
STAT6	9185.72	-0.0420152	0.0420152	0	0	0.240368	-0.174796	0.86124	0.927551	0.0648758
TNFSF10	3511.18	-0.0522894	0.0522894	0	0	0.302667	-0.172762	0.862839	0.927551	0.0640704
TGFB1	12807.3	0.0340863	0.0340863	0	0	0.202037	0.168713	0.866023	0.928395	0.0624708
IL2	10.0127	0.16297	0.16297	0	0	1.07342	0.151823	0.879327	0.937464	0.0558498
TNFRSF17	302.033	-0.079916	0.079916	0	0	0.517595	-0.154399	0.877295	0.937464	0.0568541
IL4	2.24396	-0.435948	0.435948	0	0	2.97883	-0.146349	0.883646	0.939481	0.0537217
AIF1	7058.15	0.0332254	0.0332254	0	0	0.237493	0.1399	0.888739	0.942307	0.0512259
GAGE12J	0.0711278	0.410689	0.410689	0	0	3.04045	0.135075	0.892553	0.943765	0.0493662
SKAP2	2677.28	0.0349403	0.0349403	0	0	0.272957	0.128007	0.898144	0.94475	0.0466542
STAT5A	1716.14	0.031999	0.031999	0	0	0.250532	0.127724	0.898367	0.94475	0.0465461
MMP9	4763.99	-0.0435527	0.0435527	0	0	0.439837	-0.0990201	0.921122	0.961844	0.0356827
SH2D1A	523.738	0.0303593	0.0303593	0	0	0.31037	0.0978166	0.922078	0.961844	0.0352324
TLR9	373.078	0.0405363	0.0405363	0	0	0.406378	0.0997502	0.920543	0.961844	0.0359561
AXL	1933.67	-0.016242	0.016242	0	0	0.254299	-0.0638697	0.949074	0.981926	0.0226999
CD160	54.774	-0.0455379	0.0455379	0	0	0.817905	-0.0556762	0.9556	0.981926	0.019724
CX3CL1	1643.52	-0.0204984	0.0204984	0	0	0.407344	-0.0503222	0.959866	0.981926	0.0177896
FCER1G	14842.4	-0.00927414	0.00927414	0	0	0.206426	-0.0449272	0.964165	0.981926	0.0158485
GZMA	2215.91	0.0204726	0.0204726	0	0	0.329528	0.0621272	0.950462	0.981926	0.0220654
HAVCR2	2979.79	-0.00832152	0.00832152	0	0	0.184598	-0.0450792	0.964044	0.981926	0.0159031
ID3	1622.64	0.0191288	0.0191288	0	0	0.359021	0.0532804	0.957508	0.981926	0.0188574
PTPN7	1887.52	0.0252555	0.0252555	0	0	0.360595	0.0700384	0.944163	0.981926	0.024953
SRGN	22086.8	-0.0142981	0.0142981	0	0	0.236107	-0.0605575	0.951712	0.981926	0.0214946
ICOSLG	1520.91	0.00924052	0.00924052	0	0	0.260688	0.0354467	0.971724	0.984442	0.0124573
IDO1	1110.12	0.0138578	0.0138578	0	0	0.390148	0.0355194	0.971666	0.984442	0.0124832
GPR18	174.207	0.0054477	0.0054477	0	0	0.557653	0.00976897	0.992206	0.999012	0.00339832
HLA-DQA2	56.0986	0.00797812	0.00797812	0	0	1.03494	0.00770876	0.993849	0.999012	0.00267944
KIR2DL2	0.980384	0.0351397	0.0351397	0	0	2.95763	0.011881	0.990521	0.999012	0.00413651
CD2	4105.75	-0.000638114	0.000638114	0	0	0.251187	-0.0025404	0.997973	0.999605	0.000881183
MAGEA10	0.27714	-0.00150619	0.00150619	0	0	3.04045	-0.000495385	0.999605	0.999605	0.000171693
BAGE	0	0	0	0	0	0	0	1	NA	0
CTAG1B	0	0	0	0	0	0	0	1	NA	0
GAGE13	0	NA	#VALUE!	#VALUE!	#VALUE!	NA	NA	NA	NA	#VALUE!
GAGE2C	0	NA	#VALUE!	#VALUE!	#VALUE!	NA	NA	NA	NA	#VALUE!
IL17F	0	NA	#VALUE!	#VALUE!	#VALUE!	NA	NA	NA	NA	#VALUE!
MAGEA1	0	0	0	0	0	0	0	1	NA	0
MLANA	0	NA	#VALUE!	#VALUE!	#VALUE!	NA	NA	NA	NA	#VALUE!
SSX2	0	NA	#VALUE!	#VALUE!	#VALUE!	NA	NA	NA	NA	#VALUE!

## Sheet: Table S6
Supplementary Table S6. DESeq2 results: post-treatment samples, differences by progression status (progression vs no progression)
	baseMean	log2FoldChange	|log2FoldChange|	FC >= 1,5	FC >= 2	lfcSE	stat	pvalue	padj	minus_log10_padj
IFI6	11535.7	2.66965	2.66965	1	1	0.549827	4.85543	1.20123e-06	0.000392803	3.40583
BST2	21948.5	1.89445	1.89445	1	0	0.406438	4.66111	3.14507e-06	0.000514218	3.28885
OAS1	3061.21	2.34168	2.34168	1	1	0.522487	4.48179	7.40193e-06	0.00080681	3.09323
CD8B	1284.56	1.97096	1.97096	1	0	0.50286	3.9195	8.87328e-05	0.00580313	2.23634
SDHA	5162.35	1.48563	1.48563	0	0	0.376083	3.95027	7.80618e-05	0.00580313	2.23634
ISG15	3345.46	2.00754	2.00754	1	1	0.533956	3.75975	0.000170084	0.00926957	2.03294
HMBS	585.315	2.07689	2.07689	1	1	0.559206	3.71399	0.000204013	0.00953034	2.02089
AKT1	5345.34	1.50549	1.50549	1	0	0.42923	3.50741	0.000452489	0.0164404	1.78409
OAS3	1457.63	2.00853	2.00853	1	1	0.567931	3.53657	0.000405359	0.0164404	1.78409
IFI27	5910.24	2.05434	2.05434	1	1	0.613717	3.34737	0.000815815	0.0266771	1.57386
KRT7	8589.77	2.15544	2.15544	1	1	0.677956	3.17932	0.0014762	0.0438833	1.3577
OAS2	3342.16	1.25755	1.25755	0	0	0.407407	3.08671	0.00202388	0.0516314	1.28709
TNFRSF18	599.956	2.42173	2.42173	1	1	0.785634	3.08251	0.00205263	0.0516314	1.28709
CCL2	17095.1	-2.33155	2.33155	1	1	0.778342	-2.99554	0.00273961	0.060039	1.22157
KRT5	1931.45	-2.96517	2.96517	1	1	0.990395	-2.99393	0.00275408	0.060039	1.22157
BTLA	612.261	-1.67754	1.67754	1	0	0.581089	-2.88688	0.00389081	0.0795184	1.09953
EGR3	3806.79	-1.85068	1.85068	1	0	0.657587	-2.81436	0.00488751	0.0887898	1.05164
NECTIN2	512.637	1.44262	1.44262	0	0	0.510196	2.82758	0.00469009	0.0887898	1.05164
CD63	36771.2	0.8653	0.8653	0	0	0.312728	2.76694	0.00565848	0.0925161	1.03378
M6PR	9794.64	0.851521	0.851521	0	0	0.306672	2.77665	0.00549216	0.0925161	1.03378
MTOR	2390.14	1.11886	1.11886	0	0	0.410452	2.72592	0.0064123	0.0998487	1.00066
EGFR	7850.19	-1.45035	1.45035	0	0	0.560265	-2.58868	0.00963452	0.136978	0.86335
MAPK14	3577.3	0.892496	0.892496	0	0	0.344656	2.58953	0.00961074	0.136978	0.86335
PYGL	3108.43	0.922146	0.922146	0	0	0.384754	2.39671	0.0165428	0.225396	0.647054
ABCF1	6441.37	1.03557	1.03557	0	0	0.437586	2.36656	0.0179544	0.234844	0.629221
CD69	2579.03	-0.871638	0.871638	0	0	0.372709	-2.33866	0.0193531	0.243403	0.613674
GUSB	4535.55	0.658242	0.658242	0	0	0.287883	2.28649	0.0222254	0.25924	0.586298
IL6	1536.73	-1.63258	1.63258	1	0	0.727861	-2.24299	0.0248976	0.25924	0.586298
ISG20	2436.08	0.824015	0.824015	0	0	0.368565	2.23574	0.0253691	0.25924	0.586298
MX1	4282.31	1.15689	1.15689	0	0	0.513075	2.25482	0.0241445	0.25924	0.586298
PTPN11	8419.06	1.01381	1.01381	0	0	0.440705	2.30044	0.0214234	0.25924	0.586298
TBP	1238.92	0.960843	0.960843	0	0	0.42922	2.23858	0.0251832	0.25924	0.586298
CCL22	438.966	1.12081	1.12081	0	0	0.523501	2.14098	0.0322753	0.313076	0.50435
IRS1	4153.94	1.17174	1.17174	0	0	0.550329	2.12916	0.0332409	0.313076	0.50435
JCHAIN	55089.3	1.36244	1.36244	0	0	0.640869	2.12592	0.0335097	0.313076	0.50435
CXCL1	8016.16	1.64237	1.64237	1	0	0.78194	2.10037	0.0356961	0.315476	0.501034
FOXM1	975.899	2.09791	2.09791	1	1	0.99527	2.10788	0.0350415	0.315476	0.501034
DMBT1	6362.35	1.88282	1.88282	1	0	0.917212	2.05277	0.0400953	0.336183	0.473424
KLF2	11453.8	-1.03176	1.03176	0	0	0.501106	-2.05896	0.0394977	0.336183	0.473424
BATF	2755.45	0.760448	0.760448	0	0	0.384501	1.97776	0.0479564	0.340907	0.467364
BRCA1	263.207	1.79638	1.79638	1	0	0.89581	2.00531	0.0449299	0.340907	0.467364
CD44	286.632	-1.81145	1.81145	1	0	0.907272	-1.99659	0.0458699	0.340907	0.467364
CDK1	1375.43	1.62734	1.62734	1	0	0.815557	1.99537	0.0460023	0.340907	0.467364
CXCL13	3828.59	-1.52813	1.52813	1	0	0.770712	-1.98275	0.0473951	0.340907	0.467364
HGF	852.588	0.833013	0.833013	0	0	0.419787	1.98437	0.0472146	0.340907	0.467364
SNAI2	1744.03	-1.09641	1.09641	0	0	0.549579	-1.99501	0.046042	0.340907	0.467364
KREMEN1	880.298	0.819672	0.819672	0	0	0.419206	1.9553	0.0505481	0.351686	0.453845
LAMP1	2222.54	0.712936	0.712936	0	0	0.378384	1.88416	0.0595431	0.397359	0.400817
TUBB	16381.6	0.831959	0.831959	0	0	0.441134	1.88596	0.059301	0.397359	0.400817
CCL17	836.922	1.0772	1.0772	0	0	0.583467	1.8462	0.064863	0.422853	0.373811
RORC	1195.56	1.38491	1.38491	0	0	0.753173	1.83877	0.0659495	0.422853	0.373811
PVR	3406.31	0.950875	0.950875	0	0	0.525297	1.81017	0.0702696	0.441888	0.354688
BCL2L11	1146.95	0.517718	0.517718	0	0	0.294424	1.75841	0.0786776	0.459421	0.337789
LAMP3	3354.51	1.13025	1.13025	0	0	0.638491	1.77019	0.076695	0.459421	0.337789
LRG1	517.067	1.02705	1.02705	0	0	0.582415	1.76343	0.0778282	0.459421	0.337789
VEGFA	16897.3	0.995589	0.995589	0	0	0.559379	1.77981	0.0751069	0.459421	0.337789
CXCL9	4559.82	-1.14868	1.14868	0	0	0.662259	-1.73448	0.0828322	0.467002	0.330681
ID2	13978.2	0.919054	0.919054	0	0	0.528281	1.73971	0.0819103	0.467002	0.330681
PSMB9	2580.52	0.615664	0.615664	0	0	0.356898	1.72504	0.0845197	0.46844	0.329346
ADORA2A	681.015	0.776907	0.776907	0	0	0.455785	1.70455	0.0882789	0.476318	0.322103
CSF2RB	6284.34	0.555356	0.555356	0	0	0.326398	1.70147	0.0888544	0.476318	0.322103
GADD45GIP1	5941.89	0.600426	0.600426	0	0	0.358537	1.67466	0.0940019	0.479878	0.318869
ID3	1622.64	-0.971825	0.971825	0	0	0.57514	-1.68972	0.0910816	0.479878	0.318869
IFITM1	16868.7	-0.526234	0.526234	0	0	0.313851	-1.6767	0.0936012	0.479878	0.318869
STAT1	9789.36	0.693063	0.693063	0	0	0.415597	1.66763	0.0953885	0.479878	0.318869
PRDM1	4527.47	0.651034	0.651034	0	0	0.394037	1.65221	0.098491	0.486237	0.313152
TOP2A	2270.36	1.6468	1.6468	1	0	1.00008	1.64667	0.0996265	0.486237	0.313152
CDKN2A	878.751	-1.10033	1.10033	0	0	0.675877	-1.628	0.103524	0.490616	0.309258
VCAM1	2776.23	-1.0113	1.0113	0	0	0.619829	-1.63157	0.102769	0.490616	0.309258
MIF	8493.47	0.65752	0.65752	0	0	0.407803	1.61235	0.106887	0.499314	0.301626
STAT3	17410.5	0.494546	0.494546	0	0	0.311576	1.58724	0.112458	0.517942	0.285719
MMP2	50200.2	-0.655681	0.655681	0	0	0.419078	-1.56458	0.117681	0.527231	0.277999
TLR8	458.423	-1.13996	1.13996	0	0	0.728639	-1.5645	0.1177	0.527231	0.277999
CD28	781.18	-0.82181	0.82181	0	0	0.536033	-1.53313	0.125243	0.539424	0.26807
DGAT2	259.718	1.22023	1.22023	0	0	0.794145	1.53653	0.124408	0.539424	0.26807
STAT6	9185.72	0.589796	0.589796	0	0	0.38483	1.53262	0.125371	0.539424	0.26807
IFI35	1498.12	0.546426	0.546426	0	0	0.36108	1.51331	0.130201	0.552929	0.25733
ICOSLG	1520.91	0.621031	0.621031	0	0	0.418351	1.48447	0.137684	0.562899	0.24957
IFIT1	1247	0.994524	0.994524	0	0	0.669767	1.48488	0.137575	0.562899	0.24957
TAP1	6050.23	0.455431	0.455431	0	0	0.306819	1.48436	0.137712	0.562899	0.24957
CD48	1492.67	-0.589813	0.589813	0	0	0.405145	-1.45581	0.145446	0.584926	0.232899
EFNA4	429.744	0.909642	0.909642	0	0	0.62675	1.45136	0.146679	0.584926	0.232899
BCL6	9336.83	0.553886	0.553886	0	0	0.38344	1.44452	0.148594	0.585423	0.23253
CCR7	942.949	-0.669167	0.669167	0	0	0.465894	-1.43631	0.150915	0.587489	0.231
ENTPD1	2589.53	-0.465528	0.465528	0	0	0.33272	-1.39916	0.161765	0.622319	0.205987
CCNB2	799.821	1.55744	1.55744	1	0	1.11854	1.39239	0.163804	0.622837	0.205625
MKI67	841.066	1.40748	1.40748	0	0	1.01667	1.3844	0.166235	0.624815	0.204249
BRCA2	510.23	1.07478	1.07478	0	0	0.793331	1.35477	0.17549	0.638253	0.195007
FUT4	2921.71	-0.801323	0.801323	0	0	0.591265	-1.35527	0.175332	0.638253	0.195007
HERC6	647.984	0.656243	0.656243	0	0	0.486781	1.34813	0.177618	0.638253	0.195007
IL2RG	3127.15	-0.428867	0.428867	0	0	0.317082	-1.35254	0.176202	0.638253	0.195007
CDKN3	1309.19	1.39959	1.39959	0	0	1.05402	1.32785	0.184228	0.65481	0.183885
BUB1	901.927	1.05745	1.05745	0	0	0.805923	1.31209	0.189489	0.659723	0.180638
HLA-C	15291.3	1.16089	1.16089	0	0	0.887855	1.30753	0.191034	0.659723	0.180638
NFATC1	479.335	-0.702623	0.702623	0	0	0.543025	-1.29391	0.195698	0.659723	0.180638
NRP1	9685.93	0.458051	0.458051	0	0	0.353484	1.29582	0.195039	0.659723	0.180638
SLAMF7	9224.09	0.719194	0.719194	0	0	0.551553	1.30394	0.192252	0.659723	0.180638
CXCL11	401.348	-0.892805	0.892805	0	0	0.707652	-1.26165	0.207077	0.67714	0.169321
FCGR2B	480.573	0.861096	0.861096	0	0	0.681792	1.26299	0.206593	0.67714	0.169321
IL2RA	489.419	0.823458	0.823458	0	0	0.649786	1.26727	0.205057	0.67714	0.169321
AXL	1933.67	-0.50744	0.50744	0	0	0.412431	-1.23036	0.218561	0.687206	0.162913
CCL4	9069.74	-0.517847	0.517847	0	0	0.41558	-1.24608	0.212734	0.687206	0.162913
CEACAM1	315.858	1.05695	1.05695	0	0	0.858037	1.23182	0.218017	0.687206	0.162913
NT5E	844.642	-0.4491	0.4491	0	0	0.363379	-1.2359	0.216495	0.687206	0.162913
CCL18	9640.6	0.597739	0.597739	0	0	0.540493	1.10591	0.268763	0.689864	0.161237
CD53	544.4	-1.14333	1.14333	0	0	1.02063	-1.12023	0.262617	0.689864	0.161237
CX3CL1	1643.52	0.729352	0.729352	0	0	0.662115	1.10155	0.270658	0.689864	0.161237
CXCR4	22107.2	-0.482338	0.482338	0	0	0.426336	-1.13136	0.257905	0.689864	0.161237
EGR2	3704.02	-0.574505	0.574505	0	0	0.474224	-1.21146	0.225718	0.689864	0.161237
EIF2AK2	5223.02	-0.335562	0.335562	0	0	0.286884	-1.16968	0.24213	0.689864	0.161237
G6PD	3620.85	0.688423	0.688423	0	0	0.585257	1.17628	0.239485	0.689864	0.161237
GATA3	553.923	-0.448605	0.448605	0	0	0.383766	-1.16895	0.242422	0.689864	0.161237
HIF1A	7552.82	0.48916	0.48916	0	0	0.446947	1.09445	0.273759	0.689864	0.161237
HLA-E	85648.3	0.313863	0.313863	0	0	0.26861	1.16847	0.242616	0.689864	0.161237
ICAM1	14617.5	0.706914	0.706914	0	0	0.649429	1.08852	0.276367	0.689864	0.161237
IFIT3	788.664	0.651515	0.651515	0	0	0.590614	1.10312	0.269977	0.689864	0.161237
IFNA17	1551.84	-1.00961	1.00961	0	0	0.904015	-1.11681	0.264076	0.689864	0.161237
IL7R	8617.54	-0.507969	0.507969	0	0	0.427286	-1.18883	0.234508	0.689864	0.161237
MELK	645.457	1.22038	1.22038	0	0	1.03424	1.17998	0.238008	0.689864	0.161237
MS4A1	682.182	-0.850164	0.850164	0	0	0.714207	-1.19036	0.233905	0.689864	0.161237
PTK7	5612.68	0.506306	0.506306	0	0	0.4648	1.0893	0.276022	0.689864	0.161237
SRGN	22086.8	-0.435939	0.435939	0	0	0.383757	-1.13598	0.255967	0.689864	0.161237
TAGAP	2184.84	-0.473366	0.473366	0	0	0.419893	-1.12735	0.259595	0.689864	0.161237
TARP	1231.84	0.606459	0.606459	0	0	0.539244	1.12465	0.260739	0.689864	0.161237
TDO2	551.236	-0.670302	0.670302	0	0	0.603518	-1.11066	0.266715	0.689864	0.161237
TLR7	448.905	0.871861	0.871861	0	0	0.755859	1.15347	0.248717	0.689864	0.161237
TNFAIP8	1238.62	-0.420572	0.420572	0	0	0.373244	-1.1268	0.259827	0.689864	0.161237
TNFRSF17	302.033	0.919578	0.919578	0	0	0.842017	1.09211	0.274783	0.689864	0.161237
TNFRSF4	350.266	0.877756	0.877756	0	0	0.735892	1.19278	0.232956	0.689864	0.161237
TWIST1	471.685	-0.884509	0.884509	0	0	0.75395	-1.17317	0.240729	0.689864	0.161237
ZEB1	2999.05	-0.553564	0.553564	0	0	0.50511	-1.09593	0.273111	0.689864	0.161237
MRC1	10450.2	0.461963	0.461963	0	0	0.426958	1.08199	0.279259	0.6918	0.16002
MYC	6739.25	-0.598375	0.598375	0	0	0.561281	-1.06609	0.286384	0.704117	0.152355
HLA-DQA1	8080.71	-0.787326	0.787326	0	0	0.74385	-1.05845	0.289851	0.705457	0.15153
POLR2A	13793.7	0.529068	0.529068	0	0	0.501297	1.0554	0.291244	0.705457	0.15153
PIK3CD	1600.53	0.510614	0.510614	0	0	0.486364	1.04986	0.293783	0.706375	0.150964
IGF1R	11366.3	0.390115	0.390115	0	0	0.383761	1.01656	0.309364	0.738409	0.131703
ITGAX	2661.4	0.445658	0.445658	0	0	0.442353	1.00747	0.313708	0.743351	0.128806
IL2RB	1752.76	0.452511	0.452511	0	0	0.453614	0.997568	0.318489	0.749251	0.125373
CD33	1101.92	0.418957	0.418957	0	0	0.426104	0.983226	0.325496	0.749558	0.125195
IRF4	1256.18	0.780343	0.780343	0	0	0.791449	0.985968	0.324149	0.749558	0.125195
SKAP2	2677.28	-0.441037	0.441037	0	0	0.445464	-0.990062	0.322144	0.749558	0.125195
CD4	4234.96	-0.289324	0.289324	0	0	0.303104	-0.954539	0.339811	0.751794	0.123901
CD40	1006.9	0.442463	0.442463	0	0	0.456869	0.968469	0.33281	0.751794	0.123901
GBP1	8223.47	-0.339836	0.339836	0	0	0.358973	-0.946687	0.343798	0.751794	0.123901
HLA-F	690.929	0.304969	0.304969	0	0	0.314474	0.969777	0.332158	0.751794	0.123901
IFI44L	1558.23	0.509668	0.509668	0	0	0.536501	0.949985	0.34212	0.751794	0.123901
ITGAL	2403.47	-0.535967	0.535967	0	0	0.572834	-0.935641	0.349458	0.751794	0.123901
SIT1	498.315	0.636471	0.636471	0	0	0.678267	0.938378	0.34805	0.751794	0.123901
SNAI1	590.8	-0.626588	0.626588	0	0	0.652156	-0.960795	0.336655	0.751794	0.123901
STAT5A	1716.14	0.393588	0.393588	0	0	0.408967	0.962394	0.335852	0.751794	0.123901
TCF7	1219.82	-0.422493	0.422493	0	0	0.447749	-0.943593	0.345378	0.751794	0.123901
FYB	6158.68	-0.309422	0.309422	0	0	0.333612	-0.927492	0.353671	0.755886	0.121544
CBLB	4726.74	0.465342	0.465342	0	0	0.510031	0.91238	0.361568	0.767746	0.114782
CD80	1898.61	0.585714	0.585714	0	0	0.646645	0.905774	0.365055	0.770149	0.113425
CCL20	2203.2	0.844082	0.844082	0	0	0.965654	0.874104	0.382061	0.785749	0.104716
CD22	1241.34	-0.604246	0.604246	0	0	0.68624	-0.880516	0.37858	0.785749	0.104716
NCAM1	477.605	-0.758222	0.758222	0	0	0.859582	-0.882082	0.377732	0.785749	0.104716
RPS6	88376.9	0.328234	0.328234	0	0	0.374614	0.876191	0.380926	0.785749	0.104716
C1QA	22078.5	-0.276742	0.276742	0	0	0.323914	-0.85437	0.3929	0.788565	0.103163
CD226	1107.69	-0.470788	0.470788	0	0	0.562626	-0.836768	0.402723	0.788565	0.103163
CD276	929.824	0.438652	0.438652	0	0	0.510095	0.859942	0.389821	0.788565	0.103163
CD79B	575.724	-0.455875	0.455875	0	0	0.543521	-0.838745	0.401612	0.788565	0.103163
ITK	1370.65	0.504913	0.504913	0	0	0.592746	0.85182	0.394314	0.788565	0.103163
SELL	442.276	-0.367504	0.367504	0	0	0.435582	-0.843708	0.398833	0.788565	0.103163
TNFRSF9	533.193	0.696349	0.696349	0	0	0.820976	0.848197	0.396328	0.788565	0.103163
ZBTB46	276.634	-0.347205	0.347205	0	0	0.408871	-0.84918	0.395781	0.788565	0.103163
CD244	242.163	-0.670121	0.670121	0	0	0.813969	-0.823277	0.410351	0.79449	0.0999116
TBX21	408.065	-0.423409	0.423409	0	0	0.51458	-0.822824	0.410608	0.79449	0.0999116
AIF1	7058.15	-0.31839	0.31839	0	0	0.389095	-0.818284	0.413195	0.794793	0.0997458
CXCR5	252.342	-0.857144	0.857144	0	0	1.0568	-0.811077	0.417321	0.798036	0.0979777
CXCL8	9628.64	0.677359	0.677359	0	0	0.853281	0.793829	0.427295	0.806905	0.0931774
GNLY	2694.59	-0.591077	0.591077	0	0	0.74793	-0.790283	0.429362	0.806905	0.0931774
IKZF3	2362.37	0.36183	0.36183	0	0	0.454082	0.796837	0.425546	0.806905	0.0931774
BCL2	1344.77	0.316247	0.316247	0	0	0.406654	0.777681	0.436757	0.811475	0.0907248
PDCD1LG2	885.728	-0.316042	0.316042	0	0	0.404793	-0.780751	0.434949	0.811475	0.0907248
IFNB1	800.561	-0.666442	0.666442	0	0	0.872346	-0.763965	0.444888	0.817837	0.0873334
TRIM29	532.606	-0.814733	0.814733	0	0	1.06715	-0.76347	0.445183	0.817837	0.0873334
CD1C	1621.22	0.406333	0.406333	0	0	0.540589	0.751648	0.452263	0.820093	0.0861369
HLA-A	21235.5	-1.34171	1.34171	0	0	1.81077	-0.740961	0.458717	0.820093	0.0861369
HLA-B	13169.1	1.31509	1.31509	0	0	1.77577	0.740575	0.458951	0.820093	0.0861369
PTPRC	2784.74	-0.308141	0.308141	0	0	0.414444	-0.743505	0.457176	0.820093	0.0861369
S100A8	5830.55	-0.53128	0.53128	0	0	0.703213	-0.755504	0.449947	0.820093	0.0861369
CD163	7435.64	0.285083	0.285083	0	0	0.4085	0.697877	0.485254	0.821229	0.0855355
CD274	522.224	0.430553	0.430553	0	0	0.597656	0.720403	0.471277	0.821229	0.0855355
CD47	9847.64	0.235804	0.235804	0	0	0.336589	0.700568	0.483573	0.821229	0.0855355
CSF1R	1808.73	-0.210083	0.210083	0	0	0.300563	-0.698965	0.484574	0.821229	0.0855355
HAVCR2	2979.79	0.217032	0.217032	0	0	0.303449	0.715218	0.474474	0.821229	0.0855355
IL10	188.451	-0.622606	0.622606	0	0	0.870854	-0.714937	0.474648	0.821229	0.0855355
ITGB1	36382.6	0.297306	0.297306	0	0	0.406683	0.731052	0.464747	0.821229	0.0855355
KLRG1	789.044	0.487825	0.487825	0	0	0.701897	0.695009	0.48705	0.821229	0.0855355
LMNA	27701.6	-0.350018	0.350018	0	0	0.503806	-0.694749	0.487213	0.821229	0.0855355
MAD2L1	1050.19	0.536839	0.536839	0	0	0.767195	0.699742	0.484089	0.821229	0.0855355
PGF	563.908	0.396481	0.396481	0	0	0.560667	0.70716	0.479467	0.821229	0.0855355
STAT4	550.499	0.52084	0.52084	0	0	0.778522	0.669011	0.503488	0.844311	0.0734974
LYZ	78856	-0.312981	0.312981	0	0	0.472173	-0.662853	0.507425	0.846571	0.0723367
CTSS	11312.3	0.2088	0.2088	0	0	0.322629	0.647182	0.517514	0.854308	0.0683855
NCF1	4666.32	-0.306707	0.306707	0	0	0.476624	-0.6435	0.5199	0.854308	0.0683855
NKG7	5922.04	0.248221	0.248221	0	0	0.382767	0.648492	0.516667	0.854308	0.0683855
CD8A	3671.62	0.268444	0.268444	0	0	0.429661	0.624782	0.532114	0.865159	0.0629043
CYBB	9099.03	-0.201009	0.201009	0	0	0.327793	-0.613218	0.539732	0.865159	0.0629043
ITGAE	425.331	0.363306	0.363306	0	0	0.588677	0.617156	0.537132	0.865159	0.0629043
KIAA0101	604.998	0.67191	0.67191	0	0	1.07297	0.626213	0.531175	0.865159	0.0629043
KLRD1	944.898	-0.24779	0.24779	0	0	0.400535	-0.618648	0.536149	0.865159	0.0629043
CCL5	8259.78	0.26487	0.26487	0	0	0.437302	0.605691	0.54472	0.868895	0.0610328
C1QB	48947.1	-0.256162	0.256162	0	0	0.438015	-0.584824	0.558666	0.873922	0.0585274
HLA-DPB1	37137.2	-0.18945	0.18945	0	0	0.328308	-0.577048	0.563907	0.873922	0.0585274
IKZF2	254.002	0.324748	0.324748	0	0	0.558835	0.581117	0.561162	0.873922	0.0585274
IL3RA	1031.76	-0.247124	0.247124	0	0	0.425135	-0.581285	0.561049	0.873922	0.0585274
PTPN6	4889.31	0.168288	0.168288	0	0	0.291184	0.577944	0.563302	0.873922	0.0585274
TNFRSF14	2938.79	0.17742	0.17742	0	0	0.300654	0.590112	0.555116	0.873922	0.0585274
HLA-DRB1	136012	-0.375669	0.375669	0	0	0.657465	-0.571391	0.567735	0.875704	0.0576425
C10orf54	3465.44	-0.165379	0.165379	0	0	0.297187	-0.556482	0.577882	0.878918	0.0560518
FCGR3B	769.199	0.48646	0.48646	0	0	0.871583	0.558134	0.576753	0.878918	0.0560518
IGSF6	1634.17	0.263364	0.263364	0	0	0.467953	0.562799	0.573572	0.878918	0.0560518
IFIH1	1318.05	0.240538	0.240538	0	0	0.447033	0.538076	0.590524	0.893012	0.0491425
TIGIT	528.976	0.405465	0.405465	0	0	0.757798	0.535057	0.592611	0.893012	0.0491425
CCL3	1255.94	-0.321398	0.321398	0	0	0.618544	-0.519603	0.60334	0.893583	0.0488649
FCGR1A	1013.61	-0.338405	0.338405	0	0	0.644051	-0.525432	0.599283	0.893583	0.0488649
GRAP2	969.44	0.221421	0.221421	0	0	0.426817	0.518771	0.60392	0.893583	0.0488649
IRF9	6398.91	-0.11639	0.11639	0	0	0.223587	-0.520556	0.602676	0.893583	0.0488649
CD14	9282.97	0.186823	0.186823	0	0	0.364427	0.512649	0.608197	0.895858	0.0477609
ALOX15B	1585.32	0.369911	0.369911	0	0	0.737351	0.501676	0.615896	0.896405	0.0474957
EOMES	464.101	0.297527	0.297527	0	0	0.596673	0.498643	0.618031	0.896405	0.0474957
PECAM1	5511.99	-0.351543	0.351543	0	0	0.704787	-0.498793	0.617925	0.896405	0.0474957
SLAMF8	1572.34	-0.184011	0.184011	0	0	0.370609	-0.496511	0.619534	0.896405	0.0474957
POU2AF1	3370.63	0.295743	0.295743	0	0	0.60904	0.48559	0.627258	0.903583	0.0440317
IDO1	1110.12	0.304119	0.304119	0	0	0.641743	0.473896	0.635574	0.907259	0.0422685
IKZF1	17414.1	-0.227567	0.227567	0	0	0.483865	-0.47031	0.638134	0.907259	0.0422685
PIK3CA	1999.29	0.153318	0.153318	0	0	0.325865	0.470496	0.638001	0.907259	0.0422685
CXCL10	1879.04	-0.216867	0.216867	0	0	0.471172	-0.46027	0.645322	0.913508	0.0392876
ADGRE5	11447.7	0.168535	0.168535	0	0	0.371928	0.45314	0.650448	0.914919	0.0386174
ITGB7	1073.48	0.254215	0.254215	0	0	0.569555	0.44634	0.655352	0.914919	0.0386174
JAML	648.399	0.342999	0.342999	0	0	0.7619	0.450189	0.652574	0.914919	0.0386174
KLRK1	3581.53	0.196402	0.196402	0	0	0.442991	0.443353	0.657511	0.914919	0.0386174
HLA-DMA	13006.5	-0.127568	0.127568	0	0	0.291079	-0.43826	0.661197	0.916151	0.0380331
FOXP3	199.949	0.420565	0.420565	0	0	1.032	0.407524	0.683623	0.938405	0.0276096
HLA-DMB	801.47	-0.5883	0.5883	0	0	1.43353	-0.410386	0.681523	0.938405	0.0276096
LRP1	14503.2	0.124378	0.124378	0	0	0.307511	0.404469	0.685868	0.938405	0.0276096
CA4	2190.89	-0.384663	0.384663	0	0	1.0011	-0.384241	0.7008	0.940362	0.0267051
CD19	556.369	-0.320537	0.320537	0	0	0.842858	-0.380298	0.703724	0.940362	0.0267051
CD37	6924.05	-0.155636	0.155636	0	0	0.413278	-0.37659	0.706479	0.940362	0.0267051
CD6	923.422	0.156837	0.156837	0	0	0.414659	0.378232	0.705258	0.940362	0.0267051
CD74	16138.2	-0.140865	0.140865	0	0	0.400512	-0.351713	0.725053	0.940362	0.0267051
CD79A	7581.61	0.246619	0.246619	0	0	0.679854	0.362752	0.71679	0.940362	0.0267051
CD86	929.437	-0.146095	0.146095	0	0	0.41778	-0.349694	0.726568	0.940362	0.0267051
HLA-DOB	1791.19	0.224038	0.224038	0	0	0.643094	0.348376	0.727558	0.940362	0.0267051
IRF1	4184.21	0.139562	0.139562	0	0	0.356481	0.391499	0.695428	0.940362	0.0267051
ITGAM	2489.9	0.158807	0.158807	0	0	0.434384	0.365592	0.714669	0.940362	0.0267051
LAG3	503.829	-0.176478	0.176478	0	0	0.500024	-0.352938	0.724135	0.940362	0.0267051
NOTCH3	7102.86	0.157047	0.157047	0	0	0.443267	0.354295	0.723118	0.940362	0.0267051
TGFB1	12807.3	0.119601	0.119601	0	0	0.333648	0.358466	0.719995	0.940362	0.0267051
ZAP70	650.539	0.257989	0.257989	0	0	0.728547	0.354114	0.723254	0.940362	0.0267051
IL10RA	5074.96	0.0978825	0.0978825	0	0	0.286267	0.341928	0.732405	0.9429	0.0255346
CCR2	493.451	0.192998	0.192998	0	0	0.58311	0.330981	0.740659	0.943397	0.0253056
CCR5	2484.58	0.129096	0.129096	0	0	0.391026	0.330146	0.74129	0.943397	0.0253056
HLA-DPA1	90978.3	-0.213762	0.213762	0	0	0.657033	-0.325344	0.744921	0.943397	0.0253056
MAPK1	5562.91	0.112078	0.112078	0	0	0.34756	0.322472	0.747096	0.943397	0.0253056
TLR3	581.027	0.245828	0.245828	0	0	0.762703	0.322312	0.747216	0.943397	0.0253056
CCL21	7630.37	-0.117957	0.117957	0	0	0.471059	-0.250409	0.802271	0.945091	0.0245263
CCR6	305.136	-0.185945	0.185945	0	0	0.667882	-0.27841	0.780698	0.945091	0.0245263
CD247	1029.43	-0.131322	0.131322	0	0	0.494277	-0.265685	0.790482	0.945091	0.0245263
CD3G	3241.99	0.124868	0.124868	0	0	0.438483	0.284772	0.775818	0.945091	0.0245263
DDX58	4436.15	-0.122664	0.122664	0	0	0.48595	-0.252421	0.800716	0.945091	0.0245263
EBI3	284.07	-0.175303	0.175303	0	0	0.691449	-0.25353	0.799858	0.945091	0.0245263
FOXO1	7600.58	-0.10931	0.10931	0	0	0.386355	-0.282928	0.777232	0.945091	0.0245263
GZMA	2215.91	-0.168786	0.168786	0	0	0.542999	-0.31084	0.755923	0.945091	0.0245263
IL15	419.043	0.14117	0.14117	0	0	0.54085	0.261015	0.794081	0.945091	0.0245263
IL7	200.716	0.202533	0.202533	0	0	0.739866	0.273743	0.784282	0.945091	0.0245263
KLRB1	2149.56	-0.124677	0.124677	0	0	0.492171	-0.25332	0.800021	0.945091	0.0245263
LAPTM5	19941.4	0.0932707	0.0932707	0	0	0.374797	0.248856	0.803472	0.945091	0.0245263
LILRB1	373.618	0.200653	0.200653	0	0	0.659701	0.304157	0.761008	0.945091	0.0245263
MMP9	4763.99	-0.180459	0.180459	0	0	0.723545	-0.24941	0.803044	0.945091	0.0245263
PRF1	825.5	-0.110895	0.110895	0	0	0.405978	-0.273154	0.784735	0.945091	0.0245263
SAMHD1	7213.88	-0.1062	0.1062	0	0	0.372814	-0.284859	0.775752	0.945091	0.0245263
TFRC	7040.72	-0.157929	0.157929	0	0	0.530511	-0.297693	0.765937	0.945091	0.0245263
TNFSF13B	3535.83	-0.14358	0.14358	0	0	0.455293	-0.315359	0.752489	0.945091	0.0245263
TYROBP	82789.6	0.10464	0.10464	0	0	0.416191	0.251424	0.801487	0.945091	0.0245263
CD38	1564.16	0.11695	0.11695	0	0	0.642608	0.181994	0.855588	0.963362	0.0162106
CD40LG	270.354	0.177785	0.177785	0	0	0.79292	0.224216	0.822589	0.963362	0.0162106
CD52	34726.9	0.0672252	0.0672252	0	0	0.377134	0.178253	0.858524	0.963362	0.0162106
CORO1A	3569.64	0.0877812	0.0877812	0	0	0.438593	0.200142	0.841369	0.963362	0.0162106
CTLA4	378.849	-0.133545	0.133545	0	0	0.697722	-0.191402	0.848211	0.963362	0.0162106
CXCR6	589.963	0.142955	0.142955	0	0	0.725984	0.196912	0.843897	0.963362	0.0162106
FASLG	238.856	0.162818	0.162818	0	0	0.883967	0.18419	0.853865	0.963362	0.0162106
HLA-DOA	2111.78	-0.0672284	0.0672284	0	0	0.329413	-0.204085	0.838287	0.963362	0.0162106
IL18	1901.42	-0.0502273	0.0502273	0	0	0.278899	-0.180092	0.857081	0.963362	0.0162106
ITGA1	7050.37	-0.0929834	0.0929834	0	0	0.528146	-0.176056	0.86025	0.963362	0.0162106
NFKBIA	21399.8	0.0801591	0.0801591	0	0	0.445997	0.17973	0.857365	0.963362	0.0162106
PDCD1	492.889	-0.0975862	0.0975862	0	0	0.485526	-0.200991	0.840706	0.963362	0.0162106
RB1	5308.95	-0.106458	0.106458	0	0	0.584523	-0.182129	0.855482	0.963362	0.0162106
TLR9	373.078	0.118996	0.118996	0	0	0.671134	0.177307	0.859268	0.963362	0.0162106
CD3D	2929.68	-0.0725738	0.0725738	0	0	0.460346	-0.157651	0.874732	0.969874	0.0132849
CRTAM	372.765	0.116564	0.116564	0	0	0.752673	0.154866	0.876927	0.969874	0.0132849
HLA-DQB2	212.126	0.122816	0.122816	0	0	0.799601	0.153596	0.877928	0.969874	0.0132849
LILRB2	846.45	-0.0686611	0.0686611	0	0	0.420745	-0.163189	0.870369	0.969874	0.0132849
CD83	3105.12	0.0692541	0.0692541	0	0	0.480976	0.143986	0.885511	0.972192	0.0122481
FCER1G	14842.4	-0.0489515	0.0489515	0	0	0.341359	-0.143402	0.885973	0.972192	0.0122481
PTPN7	1887.52	-0.0796173	0.0796173	0	0	0.594905	-0.133832	0.893535	0.977211	0.0100117
CCR1	1118	-0.0539284	0.0539284	0	0	0.570645	-0.0945043	0.924709	0.977992	0.00966462
CCR4	643.047	-0.0369819	0.0369819	0	0	0.471367	-0.0784568	0.937465	0.977992	0.00966462
CD2	4105.75	-0.028646	0.028646	0	0	0.415009	-0.0690251	0.94497	0.977992	0.00966462
CD27	991.311	0.0218534	0.0218534	0	0	0.599052	0.03648	0.9709	0.977992	0.00966462
CD3E	6032.18	-0.0263176	0.0263176	0	0	0.314522	-0.0836748	0.933315	0.977992	0.00966462
CD68	27848.4	-0.0196194	0.0196194	0	0	0.360979	-0.0543505	0.956656	0.977992	0.00966462
CIITA	9129.53	0.0233989	0.0233989	0	0	0.397898	0.0588063	0.953106	0.977992	0.00966462
CXCR2	1018.12	0.079479	0.079479	0	0	0.825602	0.096268	0.923308	0.977992	0.00966462
FAS	2878.11	0.0494061	0.0494061	0	0	0.501484	0.0985198	0.92152	0.977992	0.00966462
FCGR3A	4246.41	-0.0173	0.0173	0	0	0.435339	-0.0397393	0.968301	0.977992	0.00966462
FCRLA	411.796	-0.0627739	0.0627739	0	0	1.05989	-0.0592268	0.952771	0.977992	0.00966462
GZMH	974.83	0.01839	0.01839	0	0	0.427039	0.043064	0.96565	0.977992	0.00966462
GZMK	780.596	0.0500364	0.0500364	0	0	0.677758	0.0738265	0.941148	0.977992	0.00966462
HLA-DRA	106895	0.0132698	0.0132698	0	0	0.319282	0.0415616	0.966848	0.977992	0.00966462
IFIT2	1797.37	-0.0340476	0.0340476	0	0	0.434735	-0.0783181	0.937575	0.977992	0.00966462
IFITM2	14119.6	-0.013037	0.013037	0	0	0.371565	-0.0350868	0.972011	0.977992	0.00966462
IL1B	1092.28	-0.0452748	0.0452748	0	0	0.695177	-0.0651269	0.948073	0.977992	0.00966462
ITGB2	5356.33	-0.0244819	0.0244819	0	0	0.408647	-0.0599097	0.952228	0.977992	0.00966462
LCN2	14166	-0.0966479	0.0966479	0	0	0.899527	-0.107443	0.914438	0.977992	0.00966462
LST1	990.747	0.0394997	0.0394997	0	0	0.478815	0.0824947	0.934253	0.977992	0.00966462
PTEN	13664.3	0.0593647	0.0593647	0	0	0.556589	0.106658	0.91506	0.977992	0.00966462
PTGS2	2735.24	-0.0769812	0.0769812	0	0	0.666754	-0.115457	0.908083	0.977992	0.00966462
S100A9	5664.75	-0.079861	0.079861	0	0	0.66637	-0.119845	0.904606	0.977992	0.00966462
SH2D1A	523.738	-0.023587	0.023587	0	0	0.513019	-0.0459768	0.963329	0.977992	0.00966462
TNFSF10	3511.18	0.0319997	0.0319997	0	0	0.49944	0.0640711	0.948914	0.977992	0.00966462
XAGE1B	443.249	0.0846071	0.0846071	0	0	0.914022	0.0925657	0.926249	0.977992	0.00966462
CD209	1111.9	0.0143574	0.0143574	0	0	0.747694	0.0192022	0.98468	0.9877	0.00537481
GZMB	1845.61	0.00533598	0.00533598	0	0	0.491281	0.0108614	0.991334	0.991334	0.00377997
ARG1	22.8575	-4.1405	4.1405	1	1	2.46104	-1.68242	0.0924876	NA	#VALUE!
B3GAT1	81.3703	0.0230334	0.0230334	0	0	1.10269	0.0208884	0.983335	NA	#VALUE!
BAGE	0	0	0	0	0	0	0	1	NA	#VALUE!
CD160	54.774	-0.16483	0.16483	0	0	1.35517	-0.121631	0.903191	NA	#VALUE!
CD1D	111.415	0.187064	0.187064	0	0	0.799531	0.233967	0.815011	NA	#VALUE!
CD70	71.8358	1.18621	1.18621	0	0	1.01155	1.17267	0.240928	NA	#VALUE!
CEACAM8	32.2639	1.99883	1.99883	1	0	1.85888	1.07528	0.282248	NA	#VALUE!
CLEC4C	77.4463	-2.6193	2.6193	1	1	1.53238	-1.7093	0.087395	NA	#VALUE!
CMKLR1	7.50119	-0.356321	0.356321	0	0	2.57712	-0.138264	0.890032	NA	#VALUE!
CTAG1B	0	0	0	0	0	0	0	1	NA	#VALUE!
CTAG2	2.63136	0.468262	0.468262	0	0	3.76988	0.124211	0.901148	NA	#VALUE!
CX3CR1	167.275	0.0384277	0.0384277	0	0	0.61487	0.0624974	0.950167	NA	#VALUE!
CXCR3	22.1215	-0.355511	0.355511	0	0	1.24615	-0.285287	0.775424	NA	#VALUE!
GAGE1	0.297909	0	0	0	0	4.96042	0	1	NA	#VALUE!
GAGE10	10.1348	-4.95644	4.95644	1	1	3.3204	-1.49273	0.135509	NA	#VALUE!
GAGE12J	0.0711278	0	0	0	0	4.96042	0	1	NA	#VALUE!
GAGE13	0	NA	#VALUE!	#VALUE!	#VALUE!	NA	NA	NA	NA	#VALUE!
GAGE2C	0	NA	#VALUE!	#VALUE!	#VALUE!	NA	NA	NA	NA	#VALUE!
GPR18	174.207	-1.04483	1.04483	0	0	0.90855	-1.15	0.250146	NA	#VALUE!
HLA-DQA2	56.0986	-0.222354	0.222354	0	0	1.71153	-0.129915	0.896634	NA	#VALUE!
HLA-F-AS1	25.7079	-0.498495	0.498495	0	0	1.19959	-0.415555	0.677735	NA	#VALUE!
HLA-G	24.3646	1.88367	1.88367	1	0	1.66935	1.12839	0.259156	NA	#VALUE!
ICOS	170.624	-0.675776	0.675776	0	0	0.87323	-0.773882	0.439001	NA	#VALUE!
IDO2	6.39083	1.26906	1.26906	0	0	2.62978	0.482572	0.6294	NA	#VALUE!
IFNG	98.0251	-0.522876	0.522876	0	0	0.945439	-0.553051	0.580228	NA	#VALUE!
IKZF4	119.385	1.79758	1.79758	1	0	1.10046	1.63348	0.102369	NA	#VALUE!
IL12A	161.768	0.0550547	0.0550547	0	0	1.04816	0.0525249	0.95811	NA	#VALUE!
IL12B	12.4145	1.0048	1.0048	0	0	3.33761	0.301053	0.763374	NA	#VALUE!
IL13	31.6693	-0.296587	0.296587	0	0	1.86605	-0.158938	0.873718	NA	#VALUE!
IL17A	7.91616	1.8848	1.8848	1	0	4.61373	0.408519	0.682893	NA	#VALUE!
IL17F	0	NA	#VALUE!	#VALUE!	#VALUE!	NA	NA	NA	NA	#VALUE!
IL1A	96.805	-0.381026	0.381026	0	0	1.40226	-0.271723	0.785835	NA	#VALUE!
IL2	10.0127	-6.30609	6.30609	1	1	1.82084	-3.46329	0.000533612	NA	#VALUE!
IL21	11.9917	-0.810384	0.810384	0	0	2.93713	-0.27591	0.782617	NA	#VALUE!
IL22	1.62854	-3.4089	3.4089	1	1	4.92835	-0.691692	0.489131	NA	#VALUE!
IL23A	22.3907	1.11178	1.11178	0	0	1.21952	0.911655	0.36195	NA	#VALUE!
IL4	4.45149	-3.03354	3.03354	1	1	4.9327	-0.614985	0.538564	NA	#VALUE!
KIR2DL1	0.16364	0	0	0	0	4.96042	0	1	NA	#VALUE!
KIR2DL2	0.980384	-3.03134	3.03134	1	1	4.93273	-0.614537	0.538861	NA	#VALUE!
KIR2DL3	27.021	1.30052	1.30052	0	0	1.58747	0.819244	0.412647	NA	#VALUE!
KLRF1	123.458	-0.665043	0.665043	0	0	1.10363	-0.602597	0.546777	NA	#VALUE!
LCK	7.56271	0.654031	0.654031	0	0	1.82988	0.357417	0.72078	NA	#VALUE!
LEXM	25.0767	-3.06916	3.06916	1	1	2.59487	-1.18278	0.236897	NA	#VALUE!
LY9	160.834	0.272012	0.272012	0	0	1.12761	0.241228	0.809379	NA	#VALUE!
MADCAM1	84.346	0.013873	0.013873	0	0	1.34538	0.0103115	0.991773	NA	#VALUE!
MAGEA1	0	0	0	0	0	0	0	1	NA	#VALUE!
MAGEA10	0.27714	-0.769827	0.769827	0	0	4.95984	-0.155212	0.876654	NA	#VALUE!
MAGEA12	6.63562	1.86109	1.86109	1	0	4.83294	0.385084	0.700175	NA	#VALUE!
MAGEA3	31.7532	3.30572	3.30572	1	1	2.97082	1.11273	0.265825	NA	#VALUE!
MAGEA4	0.155059	-1.95545	1.95545	1	0	4.94672	-0.395303	0.692619	NA	#VALUE!
MAGEC2	0.221682	-2.36413	2.36413	1	1	4.94106	-0.478466	0.632319	NA	#VALUE!
MLANA	0	NA	#VALUE!	#VALUE!	#VALUE!	NA	NA	NA	NA	#VALUE!
MPO	80.6494	0.263625	0.263625	0	0	1.13692	0.231877	0.816634	NA	#VALUE!
NCR1	67.0563	-0.186925	0.186925	0	0	0.937949	-0.199291	0.842035	NA	#VALUE!
NCR3	180.824	-0.970155	0.970155	0	0	0.964994	-1.00535	0.314729	NA	#VALUE!
NOS2	7.64973	-5.93167	5.93167	1	1	3.92237	-1.51227	0.130466	NA	#VALUE!
NTN3	64.3997	-0.615552	0.615552	0	0	1.11364	-0.552739	0.580442	NA	#VALUE!
PMEL	43.5569	1.45449	1.45449	0	0	1.53767	0.945905	0.344197	NA	#VALUE!
PTPRCAP	27.2854	-0.164018	0.164018	0	0	1.34937	-0.121552	0.903254	NA	#VALUE!
SH2D1B	115.836	-0.837489	0.837489	0	0	0.955898	-0.876128	0.380961	NA	#VALUE!
SSX2	0	NA	#VALUE!	#VALUE!	#VALUE!	NA	NA	NA	NA	#VALUE!
TNF	147.267	0.586531	0.586531	0	0	0.651571	0.90018	0.368024	NA	#VALUE!
TNFSF14	117.305	1.89553	1.89553	1	0	1.87472	1.0111	0.311968	NA	#VALUE!
TNFSF18	57.2703	-1.21463	1.21463	0	0	1.32013	-0.92009	0.357526	NA	#VALUE!
TNFSF4	87.2987	-1.52124	1.52124	1	0	0.555639	-2.73783	0.00618462	NA	#VALUE!
TNFSF9	124.71	-1.21404	1.21404	0	0	0.795703	-1.52575	0.127073	NA	#VALUE!
TP63	115.879	1.76299	1.76299	1	0	1.15446	1.52711	0.126735	NA	#VALUE!
VTCN1	17.2354	0.96091	0.96091	0	0	2.03552	0.472072	0.636876	NA	#VALUE!

## Sheet: Table S7
Supplementary Table S7. Upregulated genes in post-treatment samples of non-CPR tumors with disease progression and correlation with % of response
		AKT1	IFI6	BST2	OAS1	OAS3	CD8B	ISG15	HMBS	IFI27	KRT7
% response	Correlation coefficient	-0.121224	-,406*	-0.168948	-,369*	-0.313003	0.0802759	-,597**	-,520**	-0.211958	0.0684923
	Significance	0.481259	0.0139907	0.324616	0.0267281	0.0630626	0.641638	0.000121906	0.00113988	0.214597	0.691428
	N	36	36	36	36	36	36	36	36	36	36

## Sheet: Table S8
Supplementary Table S8. DESeq2 results: CPR tumors, post-treatment versus pre-treatment paired samples
	baseMean	log2FoldChange	|log2FoldChange|	FC >= 1,5	FC >= 2	lfcSE	stat	pvalue	padj	minus_log10_padj
CA4	1120.56	7.07092	7.07092	1	1	0.745768	9.48139	2.51e-21	9.84e-19	18.0072
MELK	1259.95	-3.6019	3.6019	1	1	0.467724	-7.7009	1.35e-14	2.65e-12	11.5771
BUB1	1255.06	-3.41003	3.41003	1	1	0.455604	-7.48463	7.18e-14	9.38e-12	11.028
CDKN2A	4145.46	-3.66224	3.66224	1	1	0.512789	-7.14181	9.21e-13	9.03e-11	10.0445
TOP2A	2366.93	-3.60813	3.60813	1	1	0.508757	-7.09205	1.32e-12	1.04e-10	9.98465
CDK1	1333.4	-2.59029	2.59029	1	1	0.369291	-7.01423	2.31e-12	1.51e-10	9.82085
JCHAIN	57444.3	3.55989	3.55989	1	1	0.555314	6.41059	1.45e-10	8.12e-09	8.09057
CD1C	1274.31	2.46845	2.46845	1	1	0.388556	6.35288	2.11e-10	1.04e-08	7.98487
CXCR4	23290.1	2.70388	2.70388	1	1	0.427031	6.33182	2.42e-10	1.06e-08	7.97662
FOXM1	1278.55	-4.5584	4.5584	1	1	0.735678	-6.19619	5.78e-10	2.27e-08	7.64443
HLA-DOB	1795.59	2.22436	2.22436	1	1	0.363536	6.11867	9.44e-10	3.36e-08	7.47332
CD52	27967.2	1.97338	1.97338	1	0	0.335004	5.8906	3.85e-09	1.26e-07	6.90066
STAT1	20038.4	-1.86023	1.86023	1	0	0.319777	-5.81725	5.98e-09	1.8e-07	6.74379
CCNB2	1273.41	-4.8409	4.8409	1	1	0.834341	-5.80206	6.55e-09	1.83e-07	6.73656
TAP1	13016.9	-1.65835	1.65835	1	0	0.291505	-5.68892	1.28e-08	3.34e-07	6.47612
TNF	417.843	-2.43183	2.43183	1	1	0.431407	-5.63696	1.73e-08	4.24e-07	6.37259
ISG15	5606.12	-2.35987	2.35987	1	1	0.448401	-5.26286	1.42e-07	3.27e-06	5.4854
KLF2	8063.69	2.09353	2.09353	1	1	0.405125	5.16762	2.37e-07	5.16e-06	5.28706
OAS3	2082.97	-2.08918	2.08918	1	1	0.406776	-5.13596	2.81e-07	5.79e-06	5.23721
MKI67	1171.41	-2.77106	2.77106	1	1	0.546039	-5.07483	3.88e-07	7.6e-06	5.11909
IFIT3	1378.55	-1.9069	1.9069	1	0	0.378905	-5.03265	4.84e-07	9.03e-06	5.04432
MIF	12505.1	-1.61688	1.61688	1	0	0.325578	-4.9662	6.83e-07	1.22e-05	4.91486
CXCL10	6361.63	-2.47268	2.47268	1	1	0.502151	-4.92418	8.47e-07	1.44e-05	4.84048
CXCL11	1217.04	-2.65125	2.65125	1	1	0.540832	-4.90218	9.48e-07	1.55e-05	4.81021
CDKN3	1063.24	-2.92294	2.92294	1	1	0.619994	-4.71447	2.42e-06	3.8e-05	4.42022
BRCA1	409.448	-2.74495	2.74495	1	1	0.588675	-4.66293	3.12e-06	4.7e-05	4.32789
CD79A	8416.13	2.44481	2.44481	1	1	0.529961	4.61319	3.97e-06	5.76e-05	4.23979
MX1	7083.27	-1.89674	1.89674	1	0	0.417682	-4.54111	5.6e-06	7.67e-05	4.11499
OAS1	4674.95	-1.86016	1.86016	1	0	0.4099	-4.53807	5.68e-06	7.67e-05	4.11499
PTPRC	2632.59	1.84712	1.84712	1	0	0.409637	4.50916	6.51e-06	8.5e-05	4.07036
CD22	1172.65	1.98932	1.98932	1	0	0.447088	4.44952	8.61e-06	0.000108829	3.96326
TWIST1	937.087	-2.21048	2.21048	1	1	0.504169	-4.38441	1.16e-05	0.00014247	3.84628
ALOX15B	1759.56	3.50151	3.50151	1	1	0.830536	4.21596	2.49e-05	0.000295444	3.52952
CD27	1010.52	2.0059	2.0059	1	1	0.480779	4.17218	3.02e-05	0.000347836	3.45863
LEXM	34.5061	-6.88534	6.88534	1	1	1.65868	-4.15109	3.31e-05	0.000370606	3.43109
CEACAM1	361.555	-1.869	1.869	1	0	0.456927	-4.09036	4.31e-05	0.000456898	3.34018
LAMP3	3365.24	1.70193	1.70193	1	0	0.416113	4.09006	4.31e-05	0.000456898	3.34018
KLRG1	719.245	1.32428	1.32428	0	0	0.325732	4.06555	4.79e-05	0.000490589	3.30928
SRGN	17009.3	1.30918	1.30918	0	0	0.322357	4.06126	4.88e-05	0.000490589	3.30928
MRC1	10222.1	1.92713	1.92713	1	0	0.486695	3.95963	7.51e-05	0.000735658	3.13332
PGF	1007.59	-2.04485	2.04485	1	1	0.517806	-3.94906	7.85e-05	0.000750134	3.12486
MS4A1	757.983	2.47411	2.47411	1	1	0.632012	3.91466	9.05e-05	0.000844949	3.07317
CCL21	5957.82	3.33047	3.33047	1	1	0.858293	3.88034	0.000104311	0.000950932	3.02185
IL17A	26.4731	-10.5829	10.5829	1	1	2.75119	-3.84667	0.000119735	0.00106673	2.97195
CD8A	4169.51	1.33334	1.33334	0	0	0.349554	3.81442	0.000136506	0.00118912	2.92478
CD69	2424.17	1.95757	1.95757	1	0	0.518388	3.77626	0.000159202	0.00135668	2.86752
CD48	1616.99	1.25354	1.25354	0	0	0.34141	3.67165	0.000240991	0.00200997	2.69681
GNLY	4565.17	-2.02675	2.02675	1	1	0.558128	-3.63134	0.000281951	0.00230152	2.63799
IFI6	12911	-1.71708	1.71708	1	0	0.473527	-3.62614	0.00028769	0.00230152	2.63799
KLRB1	2036.61	1.4167	1.4167	0	0	0.395435	3.58263	0.000340151	0.00266679	2.57401
KIAA0101	503.128	-2.87017	2.87017	1	1	0.805088	-3.56503	0.000363809	0.00279634	2.55341
IL7R	9382.72	1.90685	1.90685	1	0	0.539594	3.53386	0.000409543	0.00308732	2.51042
IFI35	1882.9	-1.06959	1.06959	0	0	0.303339	-3.52606	0.000421784	0.00311961	2.5059
IFI44L	2605	-1.37892	1.37892	0	0	0.394254	-3.49754	0.000469573	0.00334677	2.47537
LCK	57.8607	-6.25232	6.25232	1	1	1.78624	-3.50026	0.000464805	0.00334677	2.47537
NECTIN2	805.725	-1.41957	1.41957	0	0	0.411204	-3.45223	0.000555977	0.00382356	2.41753
TNFRSF18	879.194	-1.68662	1.68662	1	0	0.48836	-3.45364	0.000553083	0.00382356	2.41753
EGR3	2688.66	2.00351	2.00351	1	1	0.581713	3.44415	0.000572849	0.00387167	2.4121
IDO1	3108.82	-1.86668	1.86668	1	0	0.544895	-3.42576	0.000613078	0.00407333	2.39005
HGF	592.93	2.59059	2.59059	1	1	0.757378	3.42046	0.000625144	0.00408428	2.38888
CCR4	643.445	1.4523	1.4523	0	0	0.42551	3.41309	0.000642312	0.00412764	2.3843
FCRLA	424.755	2.04339	2.04339	1	1	0.604584	3.37983	0.000725308	0.00448876	2.34787
ID2	10226.7	1.13583	1.13583	0	0	0.335812	3.38233	0.000718733	0.00448876	2.34787
KRT5	65089.8	-4.09772	4.09772	1	1	1.21343	-3.37698	0.000732859	0.00448876	2.34787
BCL2	1100.71	1.2763	1.2763	0	0	0.379263	3.36522	0.000764826	0.00461249	2.33606
IKZF1	17550.7	1.59413	1.59413	1	0	0.476425	3.34603	0.000819771	0.00479627	2.3191
PSMB9	4220.36	-1.09685	1.09685	0	0	0.327713	-3.34699	0.000816932	0.00479627	2.3191
CD37	6481.63	1.42138	1.42138	0	0	0.429367	3.3104	0.000931619	0.00537051	2.26998
DMBT1	5441.22	4.91943	4.91943	1	1	1.49531	3.2899	0.00100222	0.00561243	2.25085
G6PD	3526.17	-1.35819	1.35819	0	0	0.412676	-3.29118	0.00099767	0.00561243	2.25085
CXCL9	11377.6	-1.96283	1.96283	1	0	0.597455	-3.28532	0.00101868	0.00562428	2.24993
CD274	1102.56	-1.74648	1.74648	1	0	0.542076	-3.22184	0.00127371	0.0067472	2.17088
GZMB	3942.52	-1.74669	1.74669	1	0	0.541041	-3.22839	0.00124489	0.0067472	2.17088
IFNG	240.665	-2.16884	2.16884	1	1	0.672701	-3.22409	0.00126376	0.0067472	2.17088
IL4	37.9371	-9.10975	9.10975	1	1	2.87787	-3.16545	0.00154845	0.00809326	2.09188
OAS2	4856.07	-1.08793	1.08793	0	0	0.348476	-3.12195	0.00179658	0.00926659	2.03308
ITK	1427.41	1.19635	1.19635	0	0	0.386856	3.0925	0.00198476	0.00998572	2.00062
TRIM29	12533.7	-4.03494	4.03494	1	1	1.30489	-3.09218	0.00198695	0.00998572	2.00062
S100A9	10035.8	-1.70525	1.70525	1	0	0.554203	-3.07694	0.00209135	0.0103773	1.98391
HLA-DOA	2215.53	1.38823	1.38823	0	0	0.454677	3.05322	0.00226402	0.0110937	1.95492
HMBS	564.891	-1.3878	1.3878	0	0	0.456582	-3.03954	0.0023694	0.0114667	1.94056
BRCA2	1114.95	-1.70132	1.70132	1	0	0.567625	-2.99725	0.00272427	0.0130233	1.88528
IRF1	5216.83	-0.966232	0.966232	0	0	0.327162	-2.95337	0.00314324	0.0148452	1.82841
CCL5	8945.96	1.01049	1.01049	0	0	0.352761	2.86452	0.00417642	0.019272	1.71507
DDX58	5628.71	-0.908986	0.908986	0	0	0.317758	-2.86063	0.00422805	0.019272	1.71507
S100A8	15103.7	-1.81486	1.81486	1	0	0.634024	-2.86244	0.00420388	0.019272	1.71507
FASLG	427.939	-1.23867	1.23867	0	0	0.434179	-2.8529	0.00433219	0.0195197	1.70953
CD79B	610.015	1.56669	1.56669	1	0	0.556374	2.81588	0.00486431	0.0216683	1.66418
MAD2L1	1170.15	-1.57368	1.57368	1	0	0.56376	-2.7914	0.00524811	0.0231153	1.6361
FOXP3	381.585	-2.7341	2.7341	1	1	0.987311	-2.76924	0.00561874	0.0244727	1.61132
MTOR	2921.84	-1.05209	1.05209	0	0	0.382857	-2.74801	0.00599585	0.0258283	1.5879
HLA-DRA	109596	1.04897	1.04897	0	0	0.382579	2.74184	0.00610956	0.026032	1.58449
XAGE1B	3824.68	5.06782	5.06782	1	1	1.85255	2.73559	0.00622683	0.0262464	1.58093
SELL	507.102	1.15982	1.15982	0	0	0.429158	2.70253	0.00688131	0.0286965	1.54217
CXCL8	32960.1	-2.19325	2.19325	1	1	0.814062	-2.69421	0.00705565	0.0288106	1.54045
IL12B	23.2604	-5.64488	5.64488	1	1	2.09406	-2.69567	0.00702473	0.0288106	1.54045
HLA-DPA1	85424.7	0.949852	0.949852	0	0	0.353993	2.68325	0.00729103	0.0294648	1.5307
EIF2AK2	8755.63	-0.951534	0.951534	0	0	0.361214	-2.63427	0.00843186	0.0328675	1.48323
LAG3	686.652	-1.19344	1.19344	0	0	0.452521	-2.63731	0.00835658	0.0328675	1.48323
LRG1	1188.82	-1.35161	1.35161	0	0	0.512926	-2.6351	0.0084112	0.0328675	1.48323
TYROBP	80801.9	0.846977	0.846977	0	0	0.321702	2.6328	0.00846841	0.0328675	1.48323
KREMEN1	1753.99	-1.24379	1.24379	0	0	0.474256	-2.62261	0.00872581	0.0335345	1.47451
CD53	524.451	1.65465	1.65465	1	0	0.63388	2.61036	0.0090448	0.0344229	1.46315
CD83	2152.48	1.11552	1.11552	0	0	0.429196	2.5991	0.00934675	0.03523	1.45309
CCR7	1046.47	1.17263	1.17263	0	0	0.460455	2.54667	0.0108757	0.0406027	1.39144
CCL4	8458.14	1.06761	1.06761	0	0	0.422124	2.52914	0.0114344	0.0422856	1.37381
HERC6	1242.44	-1.26763	1.26763	0	0	0.502183	-2.52425	0.0115946	0.0424775	1.37184
CD276	1126.36	-1.12914	1.12914	0	0	0.450101	-2.50864	0.0121198	0.0439641	1.3569
EGR2	2920.48	1.17276	1.17276	0	0	0.468663	2.50236	0.0123369	0.0439641	1.3569
VTCN1	34.022	-3.76384	3.76384	1	1	1.50337	-2.5036	0.0122936	0.0439641	1.3569
BTLA	757.629	1.39463	1.39463	0	0	0.563584	2.47457	0.0133396	0.0469751	1.32813
GZMK	905.551	1.98649	1.98649	1	0	0.803471	2.47239	0.0134215	0.0469751	1.32813
KLRD1	1232.6	0.894596	0.894596	0	0	0.36258	2.46731	0.0136133	0.0472247	1.32583
IL2	15.1715	4.48655	4.48655	1	1	1.841	2.43702	0.0148089	0.0508682	1.29355
TNFSF10	5555.41	-1.2778	1.2778	0	0	0.524929	-2.43424	0.0149231	0.0508682	1.29355
RPS6	84742.8	0.75862	0.75862	0	0	0.313676	2.41849	0.0155853	0.0526674	1.27846
BST2	24404.6	-0.826341	0.826341	0	0	0.345003	-2.39517	0.0166126	0.0547803	1.26138
CXCR2	820.67	1.59093	1.59093	1	0	0.664869	2.39285	0.0167183	0.0547803	1.26138
FCGR1A	1850.49	-0.986838	0.986838	0	0	0.411742	-2.39674	0.0165417	0.0547803	1.26138
SAMHD1	8191.21	0.814965	0.814965	0	0	0.340744	2.39172	0.0167695	0.0547803	1.26138
GBP1	11696.2	-0.886341	0.886341	0	0	0.373178	-2.37512	0.0175434	0.0568347	1.24539
CD44	814.359	-1.90066	1.90066	1	0	0.801502	-2.37137	0.0177224	0.0569441	1.24455
CCR6	361.467	0.958313	0.958313	0	0	0.406771	2.3559	0.0184779	0.0588889	1.22997
CD19	413.884	1.55356	1.55356	1	0	0.662437	2.34522	0.0190157	0.0601132	1.22103
EFNA4	523.713	-1.10839	1.10839	0	0	0.473219	-2.34223	0.0191687	0.0601132	1.22103
HLA-DPB1	37414.1	0.892273	0.892273	0	0	0.388396	2.29733	0.0215999	0.0671998	1.17263
NFKBIA	16297.3	0.820378	0.820378	0	0	0.362072	2.26579	0.0234644	0.0724256	1.14011
MMP2	53203.3	1.18968	1.18968	0	0	0.528168	2.25246	0.0242931	0.0743977	1.12844
LAPTM5	21787.4	0.941849	0.941849	0	0	0.422521	2.22912	0.0258061	0.0772213	1.11226
MAGEA4	70.8973	-5.08868	5.08868	1	1	2.27818	-2.23366	0.0255054	0.0772213	1.11226
TUBB	17304.8	-0.720474	0.720474	0	0	0.323078	-2.23003	0.0257455	0.0772213	1.11226
PYGL	4791.71	-1.09885	1.09885	0	0	0.494412	-2.22253	0.0262472	0.0779462	1.10821
NFATC1	517.996	1.10733	1.10733	0	0	0.507147	2.18344	0.0290033	0.0854835	1.06812
CD8B	1094.16	0.90245	0.90245	0	0	0.414332	2.17809	0.0293997	0.0856615	1.06721
VEGFA	25107.6	-1.32592	1.32592	0	0	0.609132	-2.17673	0.0295008	0.0856615	1.06721
CD1D	97.4037	1.80094	1.80094	1	0	0.829298	2.17164	0.029883	0.0861332	1.06483
HLA-B	24771.2	0.730813	0.730813	0	0	0.337849	2.16313	0.0305308	0.0873583	1.0587
CEACAM8	40.2437	5.67839	5.67839	1	1	2.64191	2.14935	0.0316067	0.0897812	1.04681
B3GAT1	73.5368	2.44972	2.44972	1	1	1.14518	2.13916	0.0324226	0.0901395	1.04508
CD80	2452.74	-0.83932	0.83932	0	0	0.391927	-2.14152	0.0322322	0.0901395	1.04508
LRP1	12975.9	0.734054	0.734054	0	0	0.342812	2.14127	0.0322522	0.0901395	1.04508
IFIH1	1530.5	-0.776124	0.776124	0	0	0.363929	-2.13263	0.0329555	0.0903395	1.04412
IL2RB	2557.14	-0.965465	0.965465	0	0	0.452365	-2.13426	0.0328215	0.0903395	1.04412
CORO1A	3433.31	0.831647	0.831647	0	0	0.396773	2.09603	0.0360799	0.0982175	1.00781
IRF9	11661	-0.82714	0.82714	0	0	0.398412	-2.07609	0.0378853	0.102421	0.989611
TARP	1145.45	0.622619	0.622619	0	0	0.300995	2.06854	0.0385897	0.103611	0.984595
HLA-G	46.3709	2.78829	2.78829	1	1	1.3502	2.06509	0.0389142	0.103771	0.983923
HLA-DQA2	84.0411	2.76244	2.76244	1	1	1.34747	2.0501	0.040355	0.106886	0.971078
CXCL1	9328.74	-1.40933	1.40933	0	0	0.694208	-2.03012	0.042344	0.110241	0.957655
IL1B	3837.77	-1.25995	1.25995	0	0	0.620994	-2.02893	0.0424655	0.110241	0.957655
SKAP2	2307.67	0.887337	0.887337	0	0	0.437235	2.02943	0.0424149	0.110241	0.957655
JAML	559.874	0.817743	0.817743	0	0	0.407072	2.00884	0.0445542	0.114152	0.942517
TNFRSF9	943.791	-1.1159	1.1159	0	0	0.555016	-2.01058	0.0443702	0.114152	0.942517
CCR2	568.188	1.64522	1.64522	1	0	0.823354	1.99819	0.0456956	0.116316	0.934361
FOXO1	8099.58	0.820241	0.820241	0	0	0.418491	1.96	0.0499959	0.125631	0.900904
TBP	1558.96	-0.732893	0.732893	0	0	0.373914	-1.96006	0.0499891	0.125631	0.900904
CD209	1500.27	-0.958146	0.958146	0	0	0.491768	-1.94837	0.0513707	0.128263	0.891898
ITGAE	652.149	-0.800633	0.800633	0	0	0.415242	-1.92811	0.0538416	0.133582	0.874253
LY9	191.997	1.16953	1.16953	0	0	0.60775	1.92435	0.0543106	0.133898	0.873227
IFIT2	2027.41	-0.542759	0.542759	0	0	0.283068	-1.91741	0.0551854	0.134951	0.869822
IKZF2	957.278	-1.08437	1.08437	0	0	0.566098	-1.91552	0.0554265	0.134951	0.869822
CD40	1007.63	-0.56029	0.56029	0	0	0.295495	-1.89611	0.0579457	0.140214	0.853207
CLEC4C	89.5176	-2.13715	2.13715	1	1	1.13498	-1.88298	0.0597025	0.143254	0.843893
KIR2DL3	33.9941	2.52892	2.52892	1	1	1.34425	1.88129	0.0599329	0.143254	0.843893
ABCF1	7302.18	-0.708801	0.708801	0	0	0.378715	-1.8716	0.0612626	0.143802	0.842235
MYC	6125.94	0.744506	0.744506	0	0	0.397446	1.87323	0.0610372	0.143802	0.842235
TNFRSF17	373.579	1.41061	1.41061	0	0	0.752713	1.87403	0.0609257	0.143802	0.842235
NCR3	155.147	1.83276	1.83276	1	0	0.982092	1.86618	0.0620168	0.144255	0.840868
SNAI1	434.179	1.48313	1.48313	0	0	0.795278	1.86493	0.0621917	0.144255	0.840868
ITGAM	2147.68	0.591104	0.591104	0	0	0.319452	1.85037	0.0642605	0.148166	0.829251
ZAP70	696.686	-0.813484	0.813484	0	0	0.440248	-1.84778	0.0646336	0.148166	0.829251
MMP9	9064.2	-0.974619	0.974619	0	0	0.531353	-1.83422	0.0666214	0.151835	0.818629
IFITM2	11416.5	0.67649	0.67649	0	0	0.370333	1.82671	0.0677437	0.1535	0.813891
TLR3	411.2	0.801901	0.801901	0	0	0.440379	1.82094	0.0686165	0.154584	0.810835
IFI27	5164.49	-0.824786	0.824786	0	0	0.453796	-1.81753	0.0691363	0.154865	0.810046
CD4	4437.83	0.557537	0.557537	0	0	0.311751	1.78841	0.0737105	0.164173	0.784697
IFIT1	1846.54	-0.78936	0.78936	0	0	0.443867	-1.77837	0.0753433	0.166862	0.777643
CD40LG	324.76	1.48861	1.48861	0	0	0.842026	1.76789	0.0770801	0.169749	0.770192
IKZF3	2784.55	0.696783	0.696783	0	0	0.398118	1.75019	0.0800853	0.170983	0.767046
IL2RA	833.665	-0.928342	0.928342	0	0	0.527278	-1.76063	0.0783006	0.170983	0.767046
ITGB7	1787.01	-0.681549	0.681549	0	0	0.389186	-1.75122	0.0799081	0.170983	0.767046
PDCD1	476.644	0.928365	0.928365	0	0	0.528386	1.75698	0.0789209	0.170983	0.767046
PTGS2	1845.51	0.98866	0.98866	0	0	0.565209	1.74919	0.0802575	0.170983	0.767046
ZEB1	2723.95	0.697771	0.697771	0	0	0.398192	1.75235	0.0797137	0.170983	0.767046
MAGEA3	53.1593	-4.19279	4.19279	1	1	2.41959	-1.73285	0.0831223	0.176066	0.754324
TLR7	515.732	0.870713	0.870713	0	0	0.503158	1.7305	0.0835416	0.176066	0.754324
CCL2	11012	0.84231	0.84231	0	0	0.494066	1.70485	0.0882221	0.182302	0.739208
CXCR5	254.43	1.57623	1.57623	1	0	0.927551	1.69935	0.0892533	0.182302	0.739208
IL10RA	5485.92	0.702899	0.702899	0	0	0.413108	1.70149	0.0888511	0.182302	0.739208
IL7	223.802	-0.836538	0.836538	0	0	0.492327	-1.69915	0.0892908	0.182302	0.739208
MAPK1	5262.32	0.643372	0.643372	0	0	0.377246	1.70545	0.0881114	0.182302	0.739208
POU2AF1	3897.03	0.849645	0.849645	0	0	0.497942	1.70631	0.0879501	0.182302	0.739208
IFNA17	1487.34	-1.54194	1.54194	1	0	0.909238	-1.69586	0.0899125	0.18262	0.738451
CCL17	708.53	0.78383	0.78383	0	0	0.465212	1.68489	0.0920104	0.185918	0.730679
ITGA1	5756.49	0.677692	0.677692	0	0	0.409189	1.65618	0.0976849	0.196372	0.706921
IL21	11.8062	-3.85518	3.85518	1	1	2.34066	-1.64705	0.0995485	0.198086	0.703145
POLR2A	19939.5	-0.749533	0.749533	0	0	0.454736	-1.64828	0.0992949	0.198086	0.703145
IFITM1	21754.2	-0.616424	0.616424	0	0	0.375492	-1.64164	0.100664	0.199294	0.700506
EBI3	330.949	1.09297	1.09297	0	0	0.668627	1.63466	0.102121	0.201163	0.696452
C10orf54	3399.12	0.558994	0.558994	0	0	0.346351	1.61395	0.106537	0.207774	0.682408
TNFRSF4	347.91	-0.892764	0.892764	0	0	0.5524	-1.61615	0.106061	0.207774	0.682408
FCGR2B	601.501	1.3138	1.3138	0	0	0.8259	1.59074	0.111667	0.215828	0.665893
IL15	615.296	-0.665813	0.665813	0	0	0.419041	-1.5889	0.112084	0.215828	0.665893
PTPN6	6697.69	-0.49318	0.49318	0	0	0.310594	-1.58786	0.112318	0.215828	0.665893
HLA-DMA	13567.4	0.542329	0.542329	0	0	0.342978	1.58124	0.113824	0.216598	0.664346
IL2RG	3584.63	0.59617	0.59617	0	0	0.376993	1.58138	0.113791	0.216598	0.664346
CD68	28749.6	0.562131	0.562131	0	0	0.357124	1.57405	0.115476	0.218679	0.660193
ARG1	12.9134	4.62682	4.62682	1	1	2.96706	1.5594	0.118903	0.224086	0.649586
NOS2	85.5064	-2.59789	2.59789	1	1	1.68806	-1.53898	0.123808	0.232215	0.63411
ID3	1599.24	0.852211	0.852211	0	0	0.555161	1.53507	0.124767	0.232898	0.632834
CD3G	4565.99	0.610852	0.610852	0	0	0.404623	1.50968	0.131124	0.243605	0.613314
PTEN	10786.3	0.567718	0.567718	0	0	0.38236	1.48477	0.137604	0.254438	0.594419
PMEL	61.9171	-2.14349	2.14349	1	1	1.47251	-1.45567	0.145484	0.267745	0.572279
TNFSF13B	3949.99	0.553216	0.553216	0	0	0.383865	1.44117	0.149536	0.273916	0.562383
HLA-DQB2	374.342	1.40791	1.40791	0	0	0.984868	1.42954	0.152848	0.278681	0.554893
CTSS	12096	0.542652	0.542652	0	0	0.381123	1.42383	0.154497	0.280384	0.552247
HLA-E	83209	0.444993	0.444993	0	0	0.315034	1.41252	0.157796	0.28505	0.545078
IL1A	1087.2	-2.16012	2.16012	1	1	1.53698	-1.40543	0.159893	0.287514	0.541342
AKT1	5552.51	-0.499709	0.499709	0	0	0.361547	-1.38214	0.166928	0.298793	0.52463
HLA-DMB	1753.3	0.633401	0.633401	0	0	0.464209	1.36447	0.172419	0.307219	0.512552
IGF1R	18656.8	-0.674989	0.674989	0	0	0.496876	-1.35847	0.174316	0.308095	0.511315
STAT3	15475.8	0.419528	0.419528	0	0	0.308944	1.35794	0.174482	0.308095	0.511315
IL10	206.428	-0.779858	0.779858	0	0	0.587945	-1.32641	0.184703	0.32468	0.488545
CD163	9157.95	0.751617	0.751617	0	0	0.569624	1.3195	0.187003	0.327256	0.485113
CD28	933.933	0.573745	0.573745	0	0	0.43919	1.30637	0.191427	0.332128	0.478694
EOMES	666.787	0.704011	0.704011	0	0	0.540002	1.30372	0.192329	0.332128	0.478694
MAGEA10	63.808	-3.1568	3.1568	1	1	2.41959	-1.30468	0.192001	0.332128	0.478694
CSF2RB	8662.06	-0.43861	0.43861	0	0	0.339903	-1.2904	0.196913	0.337073	0.472276
CXCR3	32.77	-1.27552	1.27552	0	0	0.987968	-1.29106	0.196684	0.337073	0.472276
NOTCH3	7368.32	-0.563179	0.563179	0	0	0.438205	-1.2852	0.198724	0.338695	0.470192
TDO2	988.492	-0.683671	0.683671	0	0	0.534267	-1.27964	0.20067	0.339064	0.469718
TFRC	8418.12	-0.579565	0.579565	0	0	0.45269	-1.28027	0.20045	0.339064	0.469718
CRTAM	595.193	0.510487	0.510487	0	0	0.401576	1.27121	0.203654	0.34159	0.466495
SDHA	5792.37	-0.439741	0.439741	0	0	0.346118	-1.2705	0.203908	0.34159	0.466495
C1QB	54825.7	0.560675	0.560675	0	0	0.44373	1.26355	0.206391	0.344278	0.46309
ITGB1	30172.3	0.507067	0.507067	0	0	0.406864	1.24628	0.212661	0.353234	0.451937
TNFAIP8	1429.68	-0.486489	0.486489	0	0	0.392505	-1.23945	0.21518	0.35591	0.44866
TAGAP	3088.45	0.574369	0.574369	0	0	0.46619	1.23205	0.217931	0.358945	0.444972
PIK3CD	1817.55	-0.413862	0.413862	0	0	0.336644	-1.22938	0.21893	0.359082	0.444807
CXCR6	760.251	0.558629	0.558629	0	0	0.461928	1.20934	0.226531	0.368466	0.433603
PTK7	6537.44	-0.49211	0.49211	0	0	0.406865	-1.20952	0.226465	0.368466	0.433603
NRP1	8443.46	0.49165	0.49165	0	0	0.407517	1.20645	0.227644	0.368745	0.433274
DGAT2	246.033	-0.678815	0.678815	0	0	0.569407	-1.19214	0.233205	0.376199	0.424582
HLA-C	27857.1	0.438922	0.438922	0	0	0.369372	1.18829	0.234718	0.377088	0.423558
FCER1G	15566.1	0.430245	0.430245	0	0	0.364507	1.18035	0.237863	0.379891	0.420341
GADD45GIP1	7571.36	-0.490237	0.490237	0	0	0.41581	-1.17899	0.238401	0.379891	0.420341
SH2D1A	645.986	0.676423	0.676423	0	0	0.575924	1.1745	0.240195	0.381199	0.418848
IKZF4	147.092	-0.588319	0.588319	0	0	0.502068	-1.17179	0.241281	0.381379	0.418643
IFNB1	794.427	-0.991655	0.991655	0	0	0.849884	-1.16681	0.243286	0.383004	0.416796
FUT4	3289.85	-0.666798	0.666798	0	0	0.576346	-1.15694	0.247296	0.387761	0.411436
HLA-DQA1	14559.9	0.605579	0.605579	0	0	0.540114	1.12121	0.2622	0.409491	0.387755
LILRB2	1010.94	-0.553958	0.553958	0	0	0.495218	-1.11861	0.263305	0.409585	0.387656
CD3E	7370.57	0.403348	0.403348	0	0	0.366349	1.101	0.270899	0.416441	0.380447
LCN2	65549.6	-0.811727	0.811727	0	0	0.736985	-1.10142	0.270716	0.416441	0.380447
NT5E	1723.47	-0.677138	0.677138	0	0	0.614066	-1.10271	0.270152	0.416441	0.380447
TNFSF18	69.4583	1.11217	1.11217	0	0	1.01582	1.09485	0.273583	0.418923	0.377866
IL23A	60.6747	-1.36266	1.36266	0	0	1.24991	-1.09021	0.275622	0.420404	0.376333
GPR18	251.044	0.560931	0.560931	0	0	0.531182	1.05601	0.290966	0.442087	0.354492
CD47	10304.1	0.340211	0.340211	0	0	0.335231	1.01486	0.310175	0.469454	0.328407
IRF4	2468.28	-0.555028	0.555028	0	0	0.550155	-1.00886	0.313043	0.471973	0.326083
CX3CL1	1151.41	-0.525493	0.525493	0	0	0.536952	-0.978659	0.327748	0.492251	0.307814
CD38	2803.56	-0.428141	0.428141	0	0	0.439212	-0.974792	0.329663	0.493237	0.306945
GAGE10	5.83758	-2.91209	2.91209	1	1	2.99692	-0.971695	0.331202	0.493655	0.306576
ICOSLG	1353.28	0.385411	0.385411	0	0	0.400718	0.961801	0.336149	0.499131	0.301785
MPO	61.6133	1.18412	1.18412	0	0	1.24588	0.950425	0.341896	0.505749	0.296065
FCGR3A	5275.48	-0.322367	0.322367	0	0	0.344992	-0.934419	0.350088	0.515919	0.287419
GAGE1	74.0695	-2.43775	2.43775	1	1	2.67137	-0.912547	0.361481	0.530714	0.27514
ZBTB46	253.063	0.39559	0.39559	0	0	0.440857	0.897322	0.369547	0.540532	0.267179
IRS1	3693.34	0.410981	0.410981	0	0	0.461453	0.890625	0.37313	0.543744	0.264606
ENTPD1	3218.12	0.279803	0.279803	0	0	0.319191	0.876601	0.380704	0.552725	0.257491
CMKLR1	13.4174	-1.8119	1.8119	1	0	2.10625	-0.860247	0.389653	0.563631	0.249005
EGFR	9066.45	-0.449074	0.449074	0	0	0.534413	-0.840313	0.400733	0.573454	0.241502
SNAI2	2330.74	-0.367402	0.367402	0	0	0.435998	-0.842669	0.399414	0.573454	0.241502
TGFB1	15147.2	-0.243315	0.243315	0	0	0.289614	-0.840136	0.400832	0.573454	0.241502
CD3D	3885.56	0.338388	0.338388	0	0	0.41023	0.824874	0.409443	0.581528	0.235429
HLA-F	821.399	0.297862	0.297862	0	0	0.361098	0.824881	0.409439	0.581528	0.235429
GAGE12J	8.5966	-2.48254	2.48254	1	1	3.0238	-0.820998	0.411647	0.582548	0.234669
LYZ	108714	0.378508	0.378508	0	0	0.465498	0.813125	0.416146	0.586796	0.231513
RB1	4460.92	0.316779	0.316779	0	0	0.393321	0.805394	0.420592	0.59094	0.228457
CCR5	3218.31	0.326107	0.326107	0	0	0.410058	0.795271	0.426456	0.591386	0.228129
CD74	20824.7	0.279127	0.279127	0	0	0.351355	0.794431	0.426944	0.591386	0.228129
LMNA	21842	0.397178	0.397178	0	0	0.496989	0.79917	0.424192	0.591386	0.228129
RORC	993.197	0.419018	0.419018	0	0	0.522619	0.801766	0.422688	0.591386	0.228129
ICOS	210.239	0.441045	0.441045	0	0	0.55776	0.790744	0.429093	0.59227	0.22748
TLR9	381.029	0.386965	0.386965	0	0	0.500301	0.773465	0.439247	0.604157	0.21885
TNFSF9	94.6588	-0.569931	0.569931	0	0	0.742548	-0.767534	0.442764	0.606866	0.216907
GAGE2C	139.005	-2.29222	2.29222	1	1	3.00062	-0.763916	0.444917	0.607675	0.216328
NTN3	52.9322	0.852845	0.852845	0	0	1.12019	0.761338	0.446455	0.607675	0.216328
FYB	6672.52	0.234641	0.234641	0	0	0.312854	0.750003	0.453253	0.614793	0.211271
CD160	60.6364	-0.845362	0.845362	0	0	1.16644	-0.724738	0.468613	0.631549	0.199593
MADCAM1	44.8691	0.900019	0.900019	0	0	1.24623	0.722193	0.470176	0.631549	0.199593
PRDM1	5910.86	0.25375	0.25375	0	0	0.351569	0.721764	0.47044	0.631549	0.199593
CXCL13	4838.06	0.513845	0.513845	0	0	0.718089	0.715573	0.474255	0.63234	0.199049
MAGEA1	34.8771	-2.15446	2.15446	1	1	3.0055	-0.716837	0.473475	0.63234	0.199049
LST1	1135.03	0.226102	0.226102	0	0	0.317926	0.711179	0.476974	0.633809	0.198042
IL17F	2.53266	-2.14309	2.14309	1	1	3.02562	-0.708312	0.478752	0.634022	0.197895
HLA-F-AS1	29.4049	0.980957	0.980957	0	0	1.39412	0.703638	0.481658	0.635724	0.196731
TCF7	1347.4	0.346379	0.346379	0	0	0.500422	0.692174	0.488828	0.643022	0.191774
IL18	2895.62	-0.255869	0.255869	0	0	0.375185	-0.681983	0.49525	0.649291	0.187561
IDO2	21.4064	-1.1074	1.1074	0	0	1.6885	-0.655845	0.511924	0.667988	0.175232
LILRB1	547.427	-0.314374	0.314374	0	0	0.480475	-0.654299	0.512919	0.667988	0.175232
HLA-A	38877.6	-0.370652	0.370652	0	0	0.573256	-0.646573	0.517908	0.672252	0.172468
SIT1	574.934	0.29945	0.29945	0	0	0.466374	0.64208	0.520821	0.673801	0.171468
AXL	1913.44	0.226776	0.226776	0	0	0.357809	0.63379	0.526218	0.678544	0.168422
ITGB2	6238.58	0.24964	0.24964	0	0	0.396617	0.629424	0.529072	0.679987	0.167499
ADGRE5	13553.5	0.198837	0.198837	0	0	0.325477	0.61091	0.541259	0.693378	0.15903
ADORA2A	695.627	-0.238166	0.238166	0	0	0.392489	-0.60681	0.543977	0.694589	0.158272
CD70	80.7358	-0.694197	0.694197	0	0	1.16268	-0.597066	0.550463	0.699268	0.155357
HIF1A	8194.52	-0.193069	0.193069	0	0	0.323969	-0.59595	0.551208	0.699268	0.155357
CCL18	17000.9	0.46039	0.46039	0	0	0.77995	0.590281	0.555002	0.701809	0.153781
IL13	12.0752	1.20309	1.20309	0	0	2.10664	0.571097	0.567934	0.715853	0.145176
AIF1	7562.6	0.175078	0.175078	0	0	0.321405	0.544726	0.585942	0.731495	0.135789
HLA-DRB1	148484	0.305982	0.305982	0	0	0.559413	0.54697	0.5844	0.731495	0.135789
STAT5A	1948.17	-0.18533	0.18533	0	0	0.338967	-0.546748	0.584552	0.731495	0.135789
GRAP2	1220.09	0.184856	0.184856	0	0	0.348022	0.531162	0.595307	0.739308	0.131174
SH2D1B	94.5613	0.325051	0.325051	0	0	0.613072	0.5302	0.595973	0.739308	0.131174
CTAG2	2.06668	-1.57237	1.57237	1	0	2.99672	-0.524696	0.599794	0.739369	0.131139
PRF1	690.014	0.213033	0.213033	0	0	0.4041	0.527179	0.598069	0.739369	0.131139
PIK3CA	2486.78	0.202757	0.202757	0	0	0.388793	0.521503	0.602016	0.739782	0.130896
CCL20	1858.13	-0.289198	0.289198	0	0	0.57107	-0.506414	0.612566	0.748055	0.126066
NCF1	5920.03	-0.216202	0.216202	0	0	0.425399	-0.508234	0.611289	0.748055	0.126066
PVR	3231.74	-0.218079	0.218079	0	0	0.436297	-0.499842	0.617186	0.751357	0.124153
CCL3	1803.26	-0.285873	0.285873	0	0	0.579436	-0.493365	0.621755	0.752247	0.12364
FCGR3B	674.946	0.336408	0.336408	0	0	0.681371	0.493722	0.621503	0.752247	0.12364
CCR1	1209.36	-0.173871	0.173871	0	0	0.389969	-0.445858	0.6557	0.786052	0.104549
IGSF6	2115.24	0.191274	0.191274	0	0	0.42475	0.450321	0.652479	0.786052	0.104549
TP63	154.422	-0.533394	0.533394	0	0	1.19638	-0.445842	0.655712	0.786052	0.104549
IL3RA	990.428	0.157683	0.157683	0	0	0.360947	0.43686	0.662213	0.786628	0.10423
LAMP1	2023	0.16656	0.16656	0	0	0.379896	0.438436	0.66107	0.786628	0.10423
PDCD1LG2	1239.96	-0.200626	0.200626	0	0	0.456923	-0.439081	0.660603	0.786628	0.10423
BATF	3139.97	-0.131784	0.131784	0	0	0.310475	-0.424458	0.671232	0.794933	0.0996695
MAPK14	3856.64	-0.141165	0.141165	0	0	0.336825	-0.419104	0.67514	0.797153	0.0984583
BCL6	10994.9	-0.203102	0.203102	0	0	0.497946	-0.407878	0.683363	0.802031	0.095809
STAT6	9923.49	-0.149603	0.149603	0	0	0.366456	-0.408242	0.683096	0.802031	0.095809
IL12A	179.887	-0.339822	0.339822	0	0	0.856627	-0.396698	0.69159	0.809264	0.09191
GZMA	2537.8	0.196916	0.196916	0	0	0.502338	0.391999	0.695059	0.810902	0.0910316
GATA3	551.845	0.178886	0.178886	0	0	0.462415	0.386851	0.698867	0.812925	0.0899496
NKG7	6747.81	0.163674	0.163674	0	0	0.440797	0.371312	0.710405	0.823901	0.0841248
CCL22	448.777	0.205945	0.205945	0	0	0.574999	0.358166	0.720219	0.830371	0.080728
CSF1R	2163.12	-0.141116	0.141116	0	0	0.393268	-0.35883	0.719722	0.830371	0.080728
GAGE13	0.674409	-1.07898	1.07898	0	0	3.04706	-0.354106	0.72326	0.831431	0.080174
TIGIT	672.803	0.172561	0.172561	0	0	0.508886	0.339095	0.734538	0.841927	0.0747256
CD244	308.629	0.166326	0.166326	0	0	0.517606	0.321337	0.747955	0.852314	0.0694002
CD6	1135.65	-0.138912	0.138912	0	0	0.434524	-0.319687	0.749205	0.852314	0.0694002
TNFRSF14	3504.97	0.111946	0.111946	0	0	0.351505	0.318476	0.750124	0.852314	0.0694002
CYBB	10388	0.110558	0.110558	0	0	0.353678	0.312595	0.754588	0.854909	0.06808
ICAM1	11747.5	0.129961	0.129961	0	0	0.427901	0.303718	0.761343	0.857604	0.066713
M6PR	9677.45	0.0872522	0.0872522	0	0	0.284743	0.306424	0.759282	0.857604	0.066713
ITGAL	2379.44	0.136869	0.136869	0	0	0.475353	0.287932	0.773399	0.868688	0.0611359
CD14	9366.59	-0.0854027	0.0854027	0	0	0.348778	-0.244862	0.806563	0.890627	0.050304
CD86	1011.35	-0.098347	0.098347	0	0	0.394414	-0.249349	0.803091	0.890627	0.050304
KIR2DL2	2.6627	-0.742065	0.742065	0	0	3.01269	-0.246313	0.80544	0.890627	0.050304
NCAM1	371.774	0.153631	0.153631	0	0	0.615077	0.249775	0.802761	0.890627	0.050304
PTPRCAP	17.8398	0.437547	0.437547	0	0	1.72341	0.253884	0.799585	0.890627	0.050304
TBX21	536.86	-0.0990458	0.0990458	0	0	0.38506	-0.257222	0.797008	0.890627	0.050304
CD2	6280.94	-0.0957279	0.0957279	0	0	0.396142	-0.24165	0.809051	0.890865	0.050188
KIR2DL1	0.473429	-0.721649	0.721649	0	0	3.05827	-0.235966	0.813459	0.89321	0.0490465
CX3CR1	134.822	-0.142408	0.142408	0	0	0.627376	-0.226989	0.820432	0.89835	0.0465544
IL22	2.24371	-0.668997	0.668997	0	0	3.0104	-0.222229	0.824136	0.898761	0.0463557
IL6	1652.36	-0.148929	0.148929	0	0	0.684192	-0.217671	0.827686	0.898761	0.0463557
KLRF1	95.1953	0.209125	0.209125	0	0	0.960736	0.217671	0.827685	0.898761	0.0463557
KRT7	9648.14	-0.0969392	0.0969392	0	0	0.481097	-0.201496	0.840311	0.90995	0.0409827
CBLB	5045.75	-0.088638	0.088638	0	0	0.448966	-0.197427	0.843493	0.91088	0.0405389
CD247	1093.66	0.0842639	0.0842639	0	0	0.469683	0.179406	0.857619	0.914907	0.038623
PTPN7	2526.13	-0.0794324	0.0794324	0	0	0.443916	-0.178936	0.857988	0.914907	0.038623
SLAMF7	14887.2	-0.0887654	0.0887654	0	0	0.499287	-0.177784	0.858892	0.914907	0.038623
SLAMF8	2352.04	-0.0941721	0.0941721	0	0	0.501638	-0.187729	0.851089	0.914907	0.038623
TNFSF4	115.841	0.117313	0.117313	0	0	0.654946	0.179118	0.857845	0.914907	0.038623
C1QA	26306	0.0700272	0.0700272	0	0	0.415744	0.168438	0.866238	0.920232	0.0361028
NCR1	81.4281	0.0934241	0.0934241	0	0	0.668184	0.139818	0.888804	0.941652	0.0261097
PTPN11	7585.31	0.0426853	0.0426853	0	0	0.350375	0.121828	0.903036	0.952678	0.0210538
STAT4	566.637	0.052751	0.052751	0	0	0.461171	0.114385	0.908933	0.952678	0.0210538
TLR8	510.952	-0.0541531	0.0541531	0	0	0.471195	-0.114927	0.908503	0.952678	0.0210538
VCAM1	3250.4	0.0599694	0.0599694	0	0	0.509628	0.117673	0.906327	0.952678	0.0210538
CD63	37773.3	0.0329033	0.0329033	0	0	0.303199	0.10852	0.913583	0.954999	0.0199972
BAGE	11.7887	-0.290529	0.290529	0	0	3.05377	-0.0951377	0.924205	0.956932	0.0191188
CD226	1593.25	0.030973	0.030973	0	0	0.342324	0.0904786	0.927907	0.956932	0.0191188
CD33	1123.88	0.0260709	0.0260709	0	0	0.307466	0.0847927	0.932426	0.956932	0.0191188
CIITA	10476.9	0.037577	0.037577	0	0	0.393508	0.0954924	0.923924	0.956932	0.0191188
CTLA4	406.584	0.0634486	0.0634486	0	0	0.640501	0.0990609	0.92109	0.956932	0.0191188
GUSB	5114.85	0.0336239	0.0336239	0	0	0.366622	0.0917128	0.926926	0.956932	0.0191188
MAGEA12	18.2183	-0.25857	0.25857	0	0	3.05372	-0.0846739	0.932521	0.956932	0.0191188
ISG20	3537.6	-0.0347488	0.0347488	0	0	0.442759	-0.0784823	0.937444	0.959473	0.0179672
MAGEC2	7.25289	-0.221226	0.221226	0	0	3.05392	-0.07244	0.942252	0.961882	0.0168782
KLRK1	5009.86	0.0197124	0.0197124	0	0	0.32148	0.0613176	0.951106	0.968399	0.0139456
ITGAX	2779.12	-0.0207518	0.0207518	0	0	0.368082	-0.0563783	0.95504	0.969886	0.0132795
FAS	2794.21	0.020151	0.020151	0	0	0.386795	0.0520973	0.958451	0.970834	0.0128549
BCL2L11	1400.46	0.0125303	0.0125303	0	0	0.326631	0.0383623	0.969399	0.97437	0.011276
HAVCR2	3477.92	0.0166115	0.0166115	0	0	0.393243	0.0422424	0.966305	0.97437	0.011276
PECAM1	5207.02	-0.0280752	0.0280752	0	0	0.706961	-0.0397125	0.968322	0.97437	0.011276
GZMH	1231.09	-0.0153883	0.0153883	0	0	0.439803	-0.0349892	0.972088	0.974575	0.0111849
TNFSF14	110.976	0.0393344	0.0393344	0	0	1.35479	0.0290335	0.976838	0.976838	0.0101775
CTAG1B	0	NA	#VALUE!	#VALUE!	#VALUE!	NA	NA	NA	NA	#VALUE!
MLANA	0	NA	#VALUE!	#VALUE!	#VALUE!	NA	NA	NA	NA	#VALUE!
SSX2	0	NA	#VALUE!	#VALUE!	#VALUE!	NA	NA	NA	NA	#VALUE!

## Sheet: Table S9
Supplementary Table S9. DESeq2 results: non-CPR tumors, post-treatment versus pre-treatment paired samples
	baseMean	log2FoldChange	|log2FoldChange|	FC >= 1,5	FC >= 2	lfcSE	stat	pvalue	padj	minus_log10_padj
TRIM29	19604.7	-5.888	5.888	1	1	0.978816	-6.01543	1.79e-09	6.91e-07	6.16052
IL1A	326.235	-5.12783	5.12783	1	1	1.25293	-4.09267	4.26e-05	0.00820903	2.08571
JCHAIN	13039.8	2.9151	2.9151	1	1	0.79772	3.65429	0.000257891	0.0287691	1.54107
KRT5	137412	-4.07787	4.07787	1	1	1.12765	-3.61625	0.000298899	0.0287691	1.54107
MMP9	13242.9	-2.28593	2.28593	1	1	0.649552	-3.51924	0.000432784	0.0333244	1.47724
S100A9	28692.1	-2.05572	2.05572	1	1	0.59558	-3.45163	0.000557209	0.0357543	1.44667
DMBT1	2281.98	3.20898	3.20898	1	1	0.949812	3.37855	0.000728699	0.0400784	1.39709
CD44	1655.2	-3.3407	3.3407	1	1	1.00568	-3.32183	0.00089429	0.0430377	1.36615
IL7	206.067	-4.77201	4.77201	1	1	1.55445	-3.06991	0.00214123	0.0915969	1.03812
IL23A	135.061	-4.96037	4.96037	1	1	1.68068	-2.95141	0.00316325	0.106009	0.974658
MAGEC2	124.845	-7.4627	7.4627	1	1	2.54013	-2.93792	0.00330417	0.106009	0.974658
XAGE1B	147.167	5.91681	5.91681	1	1	1.99967	2.9589	0.00308737	0.106009	0.974658
IL12A	127.131	-4.90497	4.90497	1	1	1.7223	-2.84791	0.0044007	0.130328	0.884961
B3GAT1	72.9043	5.51277	5.51277	1	1	1.97467	2.79174	0.00524258	0.143494	0.843166
BRCA1	1349.25	-3.06501	3.06501	1	1	1.12277	-2.72986	0.0063361	0.143494	0.843166
CD69	1145.59	2.03204	2.03204	1	1	0.741894	2.73899	0.00616278	0.143494	0.843166
CXCL13	2623.13	1.75948	1.75948	1	0	0.637559	2.75971	0.00578534	0.143494	0.843166
CD8B	1375.28	2.12841	2.12841	1	1	0.78897	2.6977	0.00698196	0.149336	0.825835
CXCR4	14229.5	1.54179	1.54179	1	0	0.592439	2.60245	0.00925608	0.187557	0.726866
CD244	130.532	-4.28406	4.28406	1	1	1.72401	-2.48493	0.0129576	0.228485	0.641143
IL15	405.518	-2.22358	2.22358	1	1	0.901567	-2.46635	0.0136497	0.228485	0.641143
IL1B	1643.32	-1.80857	1.80857	1	0	0.732098	-2.47039	0.0134966	0.228485	0.641143
TNF	268.185	-3.11691	3.11691	1	1	1.24231	-2.50896	0.0121088	0.228485	0.641143
PMEL	59.1278	-5.11571	5.11571	1	1	2.14539	-2.38452	0.0171015	0.263363	0.579445
S100A8	39696.7	-1.5136	1.5136	1	0	0.63344	-2.38949	0.0168717	0.263363	0.579445
CD8A	1911.33	1.6701	1.6701	1	0	0.70956	2.35372	0.0185867	0.275226	0.560311
FASLG	189.673	-3.91862	3.91862	1	1	1.72143	-2.27637	0.022824	0.315794	0.500596
MELK	3141.21	-2.44927	2.44927	1	1	1.07708	-2.27399	0.0229668	0.315794	0.500596
IL10	333.437	-2.89922	2.89922	1	1	1.28573	-2.25493	0.0241377	0.320449	0.494241
IGF1R	22447.6	-1.43676	1.43676	0	0	0.64809	-2.21691	0.0266294	0.341743	0.4663
IL2RA	949.357	-2.36444	2.36444	1	1	1.07371	-2.20212	0.0276571	0.343484	0.464094
CD226	744.27	-2.39791	2.39791	1	1	1.17856	-2.0346	0.0418908	0.413537	0.383486
ICOS	113.52	-3.69265	3.69265	1	1	1.79431	-2.05798	0.039592	0.413537	0.383486
IFI27	14874.3	1.54674	1.54674	1	0	0.741506	2.08594	0.0369842	0.413537	0.383486
IFNA17	1047.93	1.6608	1.6608	1	0	0.813214	2.04227	0.0411252	0.413537	0.383486
IL12B	15.6235	-6.95656	6.95656	1	1	3.38614	-2.05442	0.039935	0.413537	0.383486
LEXM	110.161	-3.67856	3.67856	1	1	1.74589	-2.10698	0.035119	0.413537	0.383486
PYGL	9835.11	-1.3364	1.3364	0	0	0.650778	-2.05354	0.0400204	0.413537	0.383486
SRGN	14133.4	1.22572	1.22572	0	0	0.590302	2.07642	0.037855	0.413537	0.383486
EGR3	3755.51	1.7324	1.7324	1	0	0.866562	1.99916	0.0455908	0.432869	0.363643
FCRLA	261.65	-2.95297	2.95297	1	1	1.48056	-1.9945	0.0460978	0.432869	0.363643
CCL22	696.86	-1.88274	1.88274	1	0	0.96434	-1.95236	0.050895	0.448509	0.348229
CD40LG	136.109	-3.48111	3.48111	1	1	1.79472	-1.93964	0.0524231	0.448509	0.348229
ID2	17220.4	1.23689	1.23689	0	0	0.63723	1.94104	0.052253	0.448509	0.348229
SNAI2	4028.59	-1.55585	1.55585	1	0	0.79468	-1.95783	0.05025	0.448509	0.348229
IFNB1	483.52	1.68136	1.68136	1	0	0.878878	1.91308	0.055738	0.453837	0.3431
KLF2	5286.84	1.24085	1.24085	0	0	0.653678	1.89825	0.0576625	0.453837	0.3431
NOTCH3	13433.3	-1.30423	1.30423	0	0	0.678732	-1.92157	0.0546594	0.453837	0.3431
TLR7	831.303	-2.28547	2.28547	1	1	1.20446	-1.89751	0.0577611	0.453837	0.3431
BRCA2	1934.69	-1.31632	1.31632	0	0	0.724371	-1.81719	0.0691884	0.504425	0.297204
BTLA	334.411	1.68614	1.68614	1	0	0.964776	1.7477	0.0805151	0.504425	0.297204
CCL5	4289.69	1.17496	1.17496	0	0	0.691072	1.7002	0.0890932	0.504425	0.297204
CD1C	778.403	1.39701	1.39701	0	0	0.819105	1.70553	0.0880951	0.504425	0.297204
CD209	1989.4	-1.86195	1.86195	1	0	1.08187	-1.72104	0.0852429	0.504425	0.297204
CD52	15141.7	1.12623	1.12623	0	0	0.652649	1.72563	0.0844144	0.504425	0.297204
CD80	2117.96	-2.03199	2.03199	1	1	1.17015	-1.73653	0.0824706	0.504425	0.297204
CSF2RB	6301.86	-1.02864	1.02864	0	0	0.597415	-1.72183	0.0851011	0.504425	0.297204
EOMES	349.522	-2.09332	2.09332	1	1	1.17465	-1.78207	0.0747371	0.504425	0.297204
GZMA	1714.1	1.28162	1.28162	0	0	0.718532	1.78367	0.074478	0.504425	0.297204
IKZF2	647.146	-1.41947	1.41947	0	0	0.830543	-1.70909	0.0874347	0.504425	0.297204
IKZF3	2135.11	1.18345	1.18345	0	0	0.692871	1.70804	0.0876295	0.504425	0.297204
IRF4	933.201	-1.93917	1.93917	1	0	1.12382	-1.72552	0.0844336	0.504425	0.297204
PDCD1	249.645	1.86849	1.86849	1	0	1.08249	1.7261	0.0843293	0.504425	0.297204
PECAM1	4120.37	1.13598	1.13598	0	0	0.650833	1.74543	0.0809102	0.504425	0.297204
PTEN	16593.1	1.1856	1.1856	0	0	0.674311	1.75824	0.0787073	0.504425	0.297204
PTPRC	1350.81	1.34003	1.34003	0	0	0.736539	1.81936	0.0688566	0.504425	0.297204
STAT4	354.295	-2.19432	2.19432	1	1	1.22196	-1.79575	0.072535	0.504425	0.297204
TGFB1	15062.9	-1.13079	1.13079	0	0	0.619528	-1.82525	0.0679632	0.504425	0.297204
LCN2	144176	-1.43432	1.43432	0	0	0.851876	-1.68372	0.0922363	0.514652	0.288486
CCR1	1555.28	-1.85234	1.85234	1	0	1.12311	-1.64929	0.0990887	0.539012	0.268402
HLA-A	13936.6	1.25819	1.25819	0	0	0.764306	1.64618	0.0997258	0.539012	0.268402
TNFSF18	445.872	-1.63936	1.63936	1	0	0.999016	-1.64098	0.100802	0.539012	0.268402
HLA-B	19853.2	1.06527	1.06527	0	0	0.654061	1.6287	0.103376	0.542246	0.265804
NKG7	2516.2	1.21507	1.21507	0	0	0.747867	1.62471	0.104224	0.542246	0.265804
TNFRSF17	192.45	1.84901	1.84901	1	0	1.14427	1.61588	0.10612	0.544747	0.263805
IFNG	101.294	2.14637	2.14637	1	1	1.34888	1.59123	0.111559	0.565132	0.24785
SH2D1A	377.687	1.40252	1.40252	0	0	0.887709	1.57993	0.114122	0.570612	0.243659
VEGFA	24333.9	-1.04105	1.04105	0	0	0.675971	-1.54008	0.123542	0.609788	0.214821
CD38	1240.29	1.10147	1.10147	0	0	0.721734	1.52614	0.126975	0.611065	0.213912
CD79A	3754	1.16071	1.16071	0	0	0.759346	1.52857	0.126372	0.611065	0.213912
FAS	2275.82	-0.993343	0.993343	0	0	0.661034	-1.50271	0.132913	0.620737	0.207093
LILRB1	371.924	-1.94021	1.94021	1	0	1.29022	-1.50378	0.132637	0.620737	0.207093
MTOR	5059.95	-1.05042	1.05042	0	0	0.700652	-1.4992	0.133821	0.620737	0.207093
LRG1	1109.39	-1.1884	1.1884	0	0	0.799095	-1.48719	0.136966	0.62776	0.202206
CCL2	11366.9	-0.957418	0.957418	0	0	0.651748	-1.469	0.141832	0.642417	0.192183
CD160	19.0315	-4.83423	4.83423	1	1	3.33915	-1.44774	0.147689	0.646139	0.189674
IL18	2583.95	-1.07286	1.07286	0	0	0.736578	-1.45655	0.145241	0.646139	0.189674
LST1	738.607	-1.29648	1.29648	0	0	0.891897	-1.45362	0.14605	0.646139	0.189674
CCL20	2501.55	-1.06173	1.06173	0	0	0.745833	-1.42354	0.154578	0.650841	0.186525
CCL4	3878.09	0.965051	0.965051	0	0	0.682876	1.41322	0.157592	0.650841	0.186525
CDK1	6491.94	-1.18562	1.18562	0	0	0.841605	-1.40876	0.158907	0.650841	0.186525
FOXM1	6170.6	-1.22113	1.22113	0	0	0.859523	-1.42071	0.155402	0.650841	0.186525
NECTIN2	1428.74	-1.02429	1.02429	0	0	0.725174	-1.41247	0.157812	0.650841	0.186525
SH2D1B	83.0892	-2.56097	2.56097	1	1	1.80892	-1.41575	0.156849	0.650841	0.186525
CORO1A	2266.68	0.881721	0.881721	0	0	0.633099	1.39271	0.163708	0.652063	0.18571
CXCL9	4143.84	1.05736	1.05736	0	0	0.760251	1.3908	0.164286	0.652063	0.18571
TFRC	22114.1	-1.05452	1.05452	0	0	0.755667	-1.39548	0.162871	0.652063	0.18571
CD276	1989.36	-0.975268	0.975268	0	0	0.715254	-1.36353	0.172716	0.667594	0.175488
CD70	40.0228	-3.32064	3.32064	1	1	2.43921	-1.36136	0.173401	0.667594	0.175488
IL3RA	890.71	-1.09906	1.09906	0	0	0.802323	-1.36985	0.170733	0.667594	0.175488
PTPN6	6538.15	-0.851259	0.851259	0	0	0.6305	-1.35013	0.176973	0.674601	0.170953
CCL21	5042.38	1.0197	1.0197	0	0	0.765172	1.33265	0.182648	0.676148	0.169959
PVR	4958.98	-0.892332	0.892332	0	0	0.664578	-1.3427	0.179368	0.676148	0.169959
TNFSF14	60.7806	-3.46171	3.46171	1	1	2.58721	-1.33801	0.180893	0.676148	0.169959
ZAP70	335.864	-1.19509	1.19509	0	0	0.901198	-1.32611	0.184803	0.677612	0.169019
CCR5	1719.52	0.945244	0.945244	0	0	0.720695	1.31157	0.189664	0.678618	0.168375
CCR6	114.119	-2.08882	2.08882	1	1	1.60826	-1.29881	0.19401	0.678618	0.168375
CXCL10	2724.14	0.939463	0.939463	0	0	0.72576	1.29445	0.195509	0.678618	0.168375
FCGR1A	2217.5	-1.22463	1.22463	0	0	0.943848	-1.29749	0.194462	0.678618	0.168375
KLRB1	1215.56	0.956067	0.956067	0	0	0.738827	1.29403	0.195654	0.678618	0.168375
VTCN1	437.181	-1.48946	1.48946	0	0	1.14519	-1.30063	0.193386	0.678618	0.168375
EGR2	2723.92	0.975213	0.975213	0	0	0.770021	1.26648	0.205342	0.705865	0.151279
MRC1	7315.96	-0.849424	0.849424	0	0	0.679059	-1.25088	0.210977	0.718816	0.143382
CCNB2	4259.11	-1.0634	1.0634	0	0	0.880281	-1.20802	0.227038	0.726723	0.138631
CD3E	3428.33	0.775809	0.775809	0	0	0.630224	1.231	0.218321	0.726723	0.138631
CD53	214.624	1.32641	1.32641	0	0	1.10449	1.20093	0.229777	0.726723	0.138631
KLRF1	54.5338	-2.72433	2.72433	1	1	2.27099	-1.19962	0.230286	0.726723	0.138631
LY9	66.8616	-2.45114	2.45114	1	1	2.04072	-1.20112	0.229706	0.726723	0.138631
PIK3CA	3362.9	-0.867305	0.867305	0	0	0.71689	-1.20982	0.22635	0.726723	0.138631
PRF1	439.734	1.05585	1.05585	0	0	0.864402	1.22148	0.221905	0.726723	0.138631
TNFSF10	7422.96	-0.796372	0.796372	0	0	0.650877	-1.22354	0.221127	0.726723	0.138631
TOP2A	12466.2	-2.3588	2.3588	1	1	1.93144	-1.22126	0.221987	0.726723	0.138631
ABCF1	11114.9	-0.807685	0.807685	0	0	0.678119	-1.19107	0.233627	0.731272	0.135921
NFKBIA	13871.3	0.814635	0.814635	0	0	0.693753	1.17424	0.240297	0.746084	0.127212
CDKN2A	6519.87	-1.01266	1.01266	0	0	0.871148	-1.16245	0.245054	0.754766	0.122188
ARG1	35.3843	-3.46044	3.46044	1	1	3.03429	-1.14044	0.254102	0.755279	0.121893
BCL6	13954.9	-0.831745	0.831745	0	0	0.727066	-1.14397	0.252634	0.755279	0.121893
CD27	590.316	1.10257	1.10257	0	0	0.972681	1.13353	0.256991	0.755279	0.121893
GZMB	1328.36	0.809226	0.809226	0	0	0.711919	1.13668	0.255671	0.755279	0.121893
IKZF4	200.996	-1.61306	1.61306	1	0	1.40301	-1.14972	0.250261	0.755279	0.121893
MKI67	3941.69	-0.980082	0.980082	0	0	0.84711	-1.15697	0.247284	0.755279	0.121893
CCR4	399.268	0.997699	0.997699	0	0	0.895863	1.11367	0.265419	0.768318	0.114459
STAT6	12526.6	-0.732155	0.732155	0	0	0.655682	-1.11663	0.264152	0.768318	0.114459
C1QB	40825.3	0.8251	0.8251	0	0	0.749516	1.10084	0.270964	0.769841	0.113599
CD247	538.634	-1.03286	1.03286	0	0	0.948814	-1.08858	0.276338	0.769841	0.113599
CD274	724.525	-0.906588	0.906588	0	0	0.850597	-1.06582	0.286503	0.769841	0.113599
CD48	966.989	0.801133	0.801133	0	0	0.757034	1.05825	0.28994	0.769841	0.113599
FOXO1	5959.89	-0.655772	0.655772	0	0	0.619029	-1.05936	0.289438	0.769841	0.113599
IFI6	31069.4	0.934417	0.934417	0	0	0.859203	1.08754	0.276799	0.769841	0.113599
IL6	772.783	0.878032	0.878032	0	0	0.820105	1.07063	0.284334	0.769841	0.113599
NCAM1	207.308	-1.44159	1.44159	0	0	1.33837	-1.07712	0.281425	0.769841	0.113599
NT5E	1677.6	-0.755551	0.755551	0	0	0.697694	-1.08293	0.278841	0.769841	0.113599
PIK3CD	1538.18	-0.805722	0.805722	0	0	0.738139	-1.09156	0.275027	0.769841	0.113599
PTPN7	1510.69	-1.13199	1.13199	0	0	1.02888	-1.10022	0.271237	0.769841	0.113599
RB1	8383.88	0.806424	0.806424	0	0	0.754266	1.06915	0.285002	0.769841	0.113599
EGFR	10805	-0.785031	0.785031	0	0	0.752872	-1.04272	0.29708	0.771422	0.112708
ITGAE	747.807	-0.83545	0.83545	0	0	0.807006	-1.03525	0.300554	0.771422	0.112708
JAML	473.858	-1.17286	1.17286	0	0	1.13197	-1.03612	0.300146	0.771422	0.112708
NFATC1	381.59	-1.30585	1.30585	0	0	1.25247	-1.04261	0.297127	0.771422	0.112708
SLAMF8	2496.24	-0.785896	0.785896	0	0	0.752457	-1.04444	0.296282	0.771422	0.112708
IFITM1	39658.6	0.648254	0.648254	0	0	0.64174	1.01015	0.312423	0.791334	0.10164
ZEB1	3059.51	-0.757431	0.757431	0	0	0.749693	-1.01032	0.312341	0.791334	0.10164
CCL3	1146.15	-1.16345	1.16345	0	0	1.18696	-0.980193	0.326991	0.79177	0.101401
CD74	14731.5	-0.658908	0.658908	0	0	0.667328	-0.987383	0.323455	0.79177	0.101401
GRAP2	642.741	-0.834025	0.834025	0	0	0.833661	-1.00044	0.317099	0.79177	0.101401
HLA-C	29007.8	0.607237	0.607237	0	0	0.610747	0.994253	0.3201	0.79177	0.101401
NCF1	3623.8	-0.698153	0.698153	0	0	0.699638	-0.997878	0.318339	0.79177	0.101401
NCR1	20.5959	-3.02522	3.02522	1	1	3.07416	-0.98408	0.325076	0.79177	0.101401
OAS1	11923.7	-0.876725	0.876725	0	0	0.894336	-0.980309	0.326934	0.79177	0.101401
EFNA4	1135.94	-0.721677	0.721677	0	0	0.746409	-0.966865	0.333612	0.801586	0.0960501
ITGAX	2734.58	-0.728749	0.728749	0	0	0.756218	-0.963676	0.335209	0.801586	0.0960501
HGF	966.318	0.834542	0.834542	0	0	0.871624	0.957456	0.338337	0.804073	0.0947044
KRT7	16783.5	-0.661936	0.661936	0	0	0.697753	-0.948667	0.34279	0.807902	0.0926411
TNFAIP8	1418.31	-0.679406	0.679406	0	0	0.718183	-0.946006	0.344145	0.807902	0.0926411
CXCL11	604.255	0.985975	0.985975	0	0	1.04748	0.94128	0.346561	0.808643	0.0922432
AXL	1809.43	-0.69691	0.69691	0	0	0.766424	-0.909301	0.363191	0.812957	0.0899324
CD33	1111.14	-0.69813	0.69813	0	0	0.75907	-0.919717	0.357721	0.812957	0.0899324
CD6	599.871	-0.738956	0.738956	0	0	0.798837	-0.925041	0.354945	0.812957	0.0899324
CIITA	6704.84	-0.604875	0.604875	0	0	0.664377	-0.91044	0.362591	0.812957	0.0899324
GADD45GIP1	12739.2	-0.618083	0.618083	0	0	0.679084	-0.910173	0.362731	0.812957	0.0899324
GNLY	1294.26	-1.08622	1.08622	0	0	1.18267	-0.918451	0.358383	0.812957	0.0899324
POLR2A	20208.1	-0.613114	0.613114	0	0	0.657537	-0.932439	0.351109	0.812957	0.0899324
CBLB	5599.17	-0.557547	0.557547	0	0	0.621637	-0.896901	0.369772	0.821646	0.085315
HLA-DQA1	4085.22	0.687457	0.687457	0	0	0.768999	0.893963	0.371341	0.821646	0.085315
CD3G	2345.44	0.567489	0.567489	0	0	0.644913	0.879947	0.378888	0.824135	0.0840017
OAS3	4342.3	-0.681428	0.681428	0	0	0.770497	-0.884401	0.37648	0.824135	0.0840017
TNFSF9	238.703	0.976905	0.976905	0	0	1.10718	0.882333	0.377597	0.824135	0.0840017
HLA-F	382.449	0.782237	0.782237	0	0	0.897268	0.871799	0.383318	0.829087	0.0814001
CD3D	1718.64	0.609145	0.609145	0	0	0.704093	0.865148	0.386957	0.829613	0.0811247
FUT4	2387.7	-0.56898	0.56898	0	0	0.661846	-0.859686	0.389962	0.829613	0.0811247
LAG3	671.923	0.720901	0.720901	0	0	0.8393	0.858931	0.390378	0.829613	0.0811247
TNFRSF4	355.626	-1.06281	1.06281	0	0	1.24208	-0.85567	0.392181	0.829613	0.0811247
HLA-DRB1	72105	0.537043	0.537043	0	0	0.637048	0.843018	0.399219	0.835321	0.0781463
TBP	2837.49	-0.619884	0.619884	0	0	0.732358	-0.846423	0.397317	0.835321	0.0781463
AKT1	10525.9	-0.506537	0.506537	0	0	0.74459	-0.68029	0.496321	0.842412	0.0744753
BCL2	1598.27	0.530634	0.530634	0	0	0.795279	0.667231	0.504625	0.842412	0.0744753
BCL2L11	1818.91	-0.521594	0.521594	0	0	0.701974	-0.743039	0.457458	0.842412	0.0744753
BUB1	4462.69	-0.684351	0.684351	0	0	0.831612	-0.822921	0.410553	0.842412	0.0744753
C10orf54	3047.73	-0.428037	0.428037	0	0	0.659949	-0.648591	0.516603	0.842412	0.0744753
CA4	74.3347	1.49945	1.49945	0	0	2.00561	0.747627	0.454685	0.842412	0.0744753
CCR2	353.95	0.912066	0.912066	0	0	1.2442	0.733057	0.463524	0.842412	0.0744753
CCR7	510.272	0.600523	0.600523	0	0	0.86901	0.691042	0.489539	0.842412	0.0744753
CD19	257.277	0.749201	0.749201	0	0	1.04488	0.71702	0.473362	0.842412	0.0744753
CD1D	79.7102	-1.19884	1.19884	0	0	1.71822	-0.697725	0.485349	0.842412	0.0744753
CD22	625.985	-0.927779	0.927779	0	0	1.17421	-0.790133	0.42945	0.842412	0.0744753
CD28	1057.71	-0.587514	0.587514	0	0	0.757638	-0.775454	0.438071	0.842412	0.0744753
CEACAM1	1133.23	-0.750859	0.750859	0	0	0.949552	-0.790751	0.429089	0.842412	0.0744753
CMKLR1	7.79299	-2.79479	2.79479	1	1	3.35531	-0.832946	0.404875	0.842412	0.0744753
CRTAM	168.346	-1.17624	1.17624	0	0	1.42461	-0.825661	0.408996	0.842412	0.0744753
CSF1R	2463.45	-0.472867	0.472867	0	0	0.733904	-0.644318	0.519369	0.842412	0.0744753
CTLA4	215.574	-0.931279	0.931279	0	0	1.32834	-0.701086	0.483249	0.842412	0.0744753
CTSS	11437.6	0.443408	0.443408	0	0	0.711811	0.62293	0.533331	0.842412	0.0744753
CX3CL1	1043.14	-0.563859	0.563859	0	0	0.791165	-0.712694	0.476035	0.842412	0.0744753
CX3CR1	127.031	0.910981	0.910981	0	0	1.27964	0.711907	0.476523	0.842412	0.0744753
CXCR5	161.403	1.12081	1.12081	0	0	1.48571	0.754395	0.450612	0.842412	0.0744753
DGAT2	605.246	0.512952	0.512952	0	0	0.823013	0.62326	0.533113	0.842412	0.0744753
EIF2AK2	18089.2	-0.513031	0.513031	0	0	0.718255	-0.714274	0.475058	0.842412	0.0744753
ENTPD1	3451.89	-0.432241	0.432241	0	0	0.694654	-0.622239	0.533785	0.842412	0.0744753
FCGR3A	5119.9	-0.544147	0.544147	0	0	0.771562	-0.705254	0.480652	0.842412	0.0744753
GAGE10	11.4588	-2.6161	2.6161	1	1	3.35123	-0.780638	0.435016	0.842412	0.0744753
GUSB	7210.59	-0.429049	0.429049	0	0	0.654518	-0.655519	0.512134	0.842412	0.0744753
HLA-DMA	9459.59	0.441552	0.441552	0	0	0.674494	0.654641	0.512699	0.842412	0.0744753
HLA-DOA	1234.83	0.538353	0.538353	0	0	0.801285	0.671862	0.501672	0.842412	0.0744753
HLA-F-AS1	20.4047	-2.47833	2.47833	1	1	3.05774	-0.81051	0.417647	0.842412	0.0744753
IFIT2	3756.52	-0.508612	0.508612	0	0	0.703321	-0.723158	0.469583	0.842412	0.0744753
IFITM2	13965.8	0.37564	0.37564	0	0	0.596543	0.629694	0.528895	0.842412	0.0744753
IL13	19.884	2.26868	2.26868	1	1	3.37575	0.672054	0.501549	0.842412	0.0744753
IRF1	4074.93	-0.426648	0.426648	0	0	0.67619	-0.63096	0.528067	0.842412	0.0744753
ITGA1	4548.22	-0.558936	0.558936	0	0	0.68995	-0.810111	0.417876	0.842412	0.0744753
ITGB2	5078.81	-0.504852	0.504852	0	0	0.729376	-0.69217	0.488831	0.842412	0.0744753
ITGB7	1018.03	-0.603615	0.603615	0	0	0.749917	-0.804908	0.420873	0.842412	0.0744753
ITK	465.868	-0.778233	0.778233	0	0	1.23	-0.632711	0.526923	0.842412	0.0744753
LYZ	45237.1	0.515474	0.515474	0	0	0.769909	0.669526	0.50316	0.842412	0.0744753
MAGEA12	59.6909	1.68254	1.68254	1	0	2.4551	0.685323	0.49314	0.842412	0.0744753
MAPK14	5831.97	-0.453002	0.453002	0	0	0.68264	-0.663603	0.506944	0.842412	0.0744753
MIF	29779.4	-0.508463	0.508463	0	0	0.768196	-0.661893	0.50804	0.842412	0.0744753
MS4A1	289.69	1.16759	1.16759	0	0	1.44724	0.806773	0.419797	0.842412	0.0744753
MYC	8600.58	-0.564601	0.564601	0	0	0.850612	-0.663759	0.506845	0.842412	0.0744753
NRP1	11937	-0.456482	0.456482	0	0	0.601738	-0.758606	0.448088	0.842412	0.0744753
NTN3	53.3889	-1.21899	1.21899	0	0	1.96808	-0.619383	0.535664	0.842412	0.0744753
PDCD1LG2	1117.12	-0.485216	0.485216	0	0	0.775257	-0.625878	0.531395	0.842412	0.0744753
POU2AF1	2024.64	0.528904	0.528904	0	0	0.773251	0.684001	0.493974	0.842412	0.0744753
PRDM1	5756.9	-0.508712	0.508712	0	0	0.695396	-0.731542	0.464448	0.842412	0.0744753
PTGS2	1423.28	0.484451	0.484451	0	0	0.772418	0.627187	0.530536	0.842412	0.0744753
PTPRCAP	16.135	2.20947	2.20947	1	1	3.3748	0.654695	0.512664	0.842412	0.0744753
RORC	1272.36	0.814735	0.814735	0	0	1.20056	0.67863	0.497372	0.842412	0.0744753
SIT1	190.239	-0.913682	0.913682	0	0	1.39989	-0.652683	0.51396	0.842412	0.0744753
SLAMF7	6645.37	0.494558	0.494558	0	0	0.603519	0.819457	0.412526	0.842412	0.0744753
TAP1	9117	-0.445614	0.445614	0	0	0.606895	-0.734252	0.462795	0.842412	0.0744753
TCF7	891.436	0.531508	0.531508	0	0	0.859001	0.618751	0.536081	0.842412	0.0744753
TIGIT	290.391	-0.869802	0.869802	0	0	1.30665	-0.665674	0.50562	0.842412	0.0744753
TLR3	478.2	0.513071	0.513071	0	0	0.822742	0.623611	0.532883	0.842412	0.0744753
TNFRSF14	2538.9	-0.42904	0.42904	0	0	0.671232	-0.639182	0.522704	0.842412	0.0744753
TP63	76.8936	1.18757	1.18757	0	0	1.87387	0.633756	0.52624	0.842412	0.0744753
VCAM1	6469.71	0.518572	0.518572	0	0	0.792213	0.654587	0.512734	0.842412	0.0744753
IL2	16.868	2.01835	2.01835	1	1	3.32575	0.606887	0.543926	0.851266	0.0699347
PTK7	14431.5	-0.415402	0.415402	0	0	0.690989	-0.60117	0.547727	0.853744	0.0686723
LAMP3	2279.69	0.53396	0.53396	0	0	0.903979	0.590678	0.554736	0.861183	0.0649043
NCR3	69.1175	1.47634	1.47634	0	0	2.54078	0.581057	0.561202	0.866967	0.0619972
ZBTB46	228.253	-0.600014	0.600014	0	0	1.03729	-0.578442	0.562966	0.866967	0.0619972
CCL18	11922.8	-0.447103	0.447103	0	0	0.84195	-0.531032	0.595396	0.906235	0.0427592
IDO2	0.919177	1.82895	1.82895	1	0	3.46752	0.527452	0.59788	0.906235	0.0427592
IL4	1.69694	1.85855	1.85855	1	0	3.45929	0.537264	0.591085	0.906235	0.0427592
KIR2DL3	1.06059	1.83724	1.83724	1	0	3.46519	0.530198	0.595974	0.906235	0.0427592
BAGE	434.171	-1.59317	1.59317	1	0	3.36953	-0.472818	0.636343	0.907378	0.0422119
CTAG2	0.494942	1.78107	1.78107	1	0	3.48147	0.511587	0.60894	0.907378	0.0422119
CXCL1	11111.7	0.419358	0.419358	0	0	0.802812	0.522361	0.601419	0.907378	0.0422119
CXCR3	17.83	1.53587	1.53587	1	0	3.11753	0.492654	0.622257	0.907378	0.0422119
DDX58	10402.4	-0.286969	0.286969	0	0	0.60536	-0.474046	0.635467	0.907378	0.0422119
GPR18	179.342	0.754159	0.754159	0	0	1.52102	0.495825	0.620018	0.907378	0.0422119
HIF1A	17494.3	-0.339089	0.339089	0	0	0.706461	-0.479983	0.63124	0.907378	0.0422119
IL17A	4.16636	-1.64364	1.64364	1	0	3.36255	-0.488809	0.624977	0.907378	0.0422119
KIR2DL2	0.35353	1.74547	1.74547	1	0	3.49235	0.499799	0.617217	0.907378	0.0422119
LRP1	17064.9	-0.295435	0.295435	0	0	0.583298	-0.506491	0.612512	0.907378	0.0422119
MAPK1	9122.62	0.360021	0.360021	0	0	0.748826	0.480781	0.630672	0.907378	0.0422119
MPO	69.3659	-0.870408	0.870408	0	0	1.75503	-0.495952	0.619929	0.907378	0.0422119
TDO2	769.408	-0.421504	0.421504	0	0	0.874147	-0.482189	0.629672	0.907378	0.0422119
TNFRSF9	488.421	0.395204	0.395204	0	0	0.826268	0.4783	0.632437	0.907378	0.0422119
TNFSF4	167.194	-0.601284	0.601284	0	0	1.18331	-0.508138	0.611357	0.907378	0.0422119
TWIST1	1535.85	-0.428596	0.428596	0	0	0.873904	-0.490439	0.623824	0.907378	0.0422119
PSMB9	2986.83	-0.32319	0.32319	0	0	0.69001	-0.468385	0.63951	0.908528	0.0416615
HERC6	1695.53	-0.342939	0.342939	0	0	0.738093	-0.464628	0.642198	0.908993	0.0414394
IKZF1	8929.36	0.341278	0.341278	0	0	0.74048	0.460887	0.64488	0.909446	0.0412233
GBP1	6819.5	0.291874	0.291874	0	0	0.656865	0.444343	0.656795	0.914291	0.0389154
GZMK	391.956	0.478996	0.478996	0	0	1.08142	0.442932	0.657815	0.914291	0.0389154
MAD2L1	2443.63	0.3222	0.3222	0	0	0.720162	0.447399	0.654587	0.914291	0.0389154
TNFRSF18	1179.77	-0.38244	0.38244	0	0	0.857125	-0.44619	0.65546	0.914291	0.0389154
HMBS	1566.66	-0.345024	0.345024	0	0	0.785993	-0.438965	0.660687	0.91498	0.0385885
MMP2	76264.9	0.333031	0.333031	0	0	0.777404	0.428389	0.668368	0.9223	0.0351279
CD63	58587.1	-0.286762	0.286762	0	0	0.685497	-0.418326	0.675709	0.926083	0.0333502
ID3	2059.21	0.368377	0.368377	0	0	0.909768	0.404913	0.685542	0.926083	0.0333502
IFIH1	2787.22	-0.272821	0.272821	0	0	0.655012	-0.416513	0.677034	0.926083	0.0333502
KLRD1	573.953	0.34775	0.34775	0	0	0.849718	0.409254	0.682353	0.926083	0.0333502
STAT1	17569.5	-0.281478	0.281478	0	0	0.682042	-0.412699	0.679827	0.926083	0.0333502
TLR8	669.469	0.358217	0.358217	0	0	0.877664	0.408148	0.683165	0.926083	0.0333502
ADGRE5	5751.23	0.218571	0.218571	0	0	0.609516	0.358597	0.719897	0.927863	0.0325162
ALOX15B	661.076	0.497718	0.497718	0	0	1.31301	0.379067	0.704638	0.927863	0.0325162
BST2	36604.9	0.256798	0.256798	0	0	0.704576	0.364471	0.715506	0.927863	0.0325162
CD14	12755.8	-0.245842	0.245842	0	0	0.654373	-0.375691	0.707146	0.927863	0.0325162
CD79B	469.667	0.323822	0.323822	0	0	0.873442	0.370742	0.71083	0.927863	0.0325162
CD86	1451.46	-0.285612	0.285612	0	0	0.793059	-0.360139	0.718743	0.927863	0.0325162
CLEC4C	45.534	1.00187	1.00187	0	0	2.85106	0.351403	0.725286	0.927863	0.0325162
CTAG1B	443.784	1.29748	1.29748	0	0	3.44869	0.376223	0.706751	0.927863	0.0325162
CYBB	7989.56	-0.264914	0.264914	0	0	0.716415	-0.369777	0.711549	0.927863	0.0325162
FOXP3	277.279	-0.343232	0.343232	0	0	0.944893	-0.363249	0.716419	0.927863	0.0325162
HLA-DRA	75884.2	0.242599	0.242599	0	0	0.692394	0.350377	0.726056	0.927863	0.0325162
ITGB1	60715.5	0.233909	0.233909	0	0	0.652085	0.35871	0.719812	0.927863	0.0325162
MADCAM1	87.0592	0.888356	0.888356	0	0	2.54018	0.349722	0.726548	0.927863	0.0325162
MX1	14800.9	-0.317462	0.317462	0	0	0.796671	-0.398486	0.690272	0.927863	0.0325162
RPS6	123092	0.232237	0.232237	0	0	0.616493	0.376706	0.706392	0.927863	0.0325162
STAT3	21930.8	0.242011	0.242011	0	0	0.658621	0.367452	0.713282	0.927863	0.0325162
TBX21	185.133	-0.509107	0.509107	0	0	1.46289	-0.348013	0.72783	0.927863	0.0325162
CDKN3	5441.4	-0.28623	0.28623	0	0	0.859532	-0.333007	0.739129	0.936605	0.0284436
HLA-DMB	1637.77	-0.259539	0.259539	0	0	0.798423	-0.325064	0.745133	0.936605	0.0284436
HLA-DPB1	20580.1	0.218058	0.218058	0	0	0.671672	0.32465	0.745446	0.936605	0.0284436
IL2RG	1982.27	0.221809	0.221809	0	0	0.681602	0.325423	0.744861	0.936605	0.0284436
LILRB2	921.811	-0.25645	0.25645	0	0	0.794469	-0.322794	0.746851	0.936605	0.0284436
BATF	2527.04	-0.221812	0.221812	0	0	0.751253	-0.295256	0.767798	0.942916	0.0255268
CD47	10734.4	-0.178421	0.178421	0	0	0.605797	-0.294523	0.768358	0.942916	0.0255268
CXCL8	18750	0.236159	0.236159	0	0	0.775559	0.304501	0.760746	0.942916	0.0255268
IL2RB	1309.46	0.200893	0.200893	0	0	0.684123	0.29365	0.769026	0.942916	0.0255268
ITGAL	1397.75	-0.255388	0.255388	0	0	0.839325	-0.304277	0.760917	0.942916	0.0255268
LAMP1	3570.19	0.200792	0.200792	0	0	0.683786	0.293647	0.769028	0.942916	0.0255268
PTPN11	15978.5	-0.21135	0.21135	0	0	0.714293	-0.295887	0.767316	0.942916	0.0255268
C1QA	20201.5	0.202695	0.202695	0	0	0.762278	0.265907	0.790311	0.94414	0.0249635
CD2	3044.53	0.176254	0.176254	0	0	0.668672	0.263589	0.792097	0.94414	0.0249635
CXCR6	279.685	0.352295	0.352295	0	0	1.33563	0.263766	0.79196	0.94414	0.0249635
FCGR3B	908.81	0.230526	0.230526	0	0	0.835381	0.275953	0.782584	0.94414	0.0249635
GAGE12J	1.20678	-0.917401	0.917401	0	0	3.46468	-0.264786	0.791174	0.94414	0.0249635
HLA-G	22.0931	0.932341	0.932341	0	0	3.37141	0.276543	0.782131	0.94414	0.0249635
KLRG1	387.423	-0.334334	0.334334	0	0	1.25011	-0.267445	0.789127	0.94414	0.0249635
M6PR	17204.9	-0.182108	0.182108	0	0	0.653722	-0.278571	0.780574	0.94414	0.0249635
SAMHD1	7329.17	0.170919	0.170919	0	0	0.632561	0.270202	0.787005	0.94414	0.0249635
CD68	25963.4	-0.182	0.182	0	0	0.732804	-0.248362	0.803855	0.954314	0.0203089
ISG15	12564.1	0.195938	0.195938	0	0	0.796108	0.24612	0.805589	0.954314	0.0203089
HLA-DPA1	56459.8	0.163624	0.163624	0	0	0.676173	0.241986	0.808791	0.955168	0.0199204
PGF	1816.95	0.200552	0.200552	0	0	0.851443	0.235544	0.813786	0.958128	0.0185766
IRF9	12028.2	-0.155592	0.155592	0	0	0.684649	-0.227258	0.820223	0.960553	0.0174787
NOS2	39.9859	-0.612871	0.612871	0	0	2.73	-0.224495	0.822372	0.960553	0.0174787
SELL	325.53	0.209568	0.209568	0	0	0.938662	0.223263	0.823331	0.960553	0.0174787
CD40	940.105	-0.154286	0.154286	0	0	0.741216	-0.208152	0.83511	0.968426	0.0139336
CD83	1927.4	-0.141541	0.141541	0	0	0.673575	-0.210134	0.833563	0.968426	0.0139336
FYB	5010.19	-0.12917	0.12917	0	0	0.64181	-0.201259	0.840496	0.971745	0.0124478
TNFSF13B	2755.44	0.146741	0.146741	0	0	0.744129	0.197198	0.843673	0.972497	0.0121118
SKAP2	3654.24	-0.129713	0.129713	0	0	0.671433	-0.193188	0.846812	0.973202	0.0117972
HAVCR2	3423.96	-0.135459	0.135459	0	0	0.741566	-0.182666	0.85506	0.974463	0.0112348
KREMEN1	3521.87	-0.148033	0.148033	0	0	0.818791	-0.180794	0.856529	0.974463	0.0112348
LCK	36.3582	0.398022	0.398022	0	0	2.20476	0.180529	0.856737	0.974463	0.0112348
STAT5A	1308.76	-0.126915	0.126915	0	0	0.709508	-0.178878	0.858033	0.974463	0.0112348
EBI3	155.592	-0.256072	0.256072	0	0	1.54443	-0.165803	0.868312	0.977485	0.00988978
IFI35	2003.22	-0.117976	0.117976	0	0	0.706195	-0.167058	0.867324	0.977485	0.00988978
LMNA	26512.1	-0.101976	0.101976	0	0	0.614781	-0.165874	0.868256	0.977485	0.00988978
AIF1	8111.58	-0.112984	0.112984	0	0	0.711458	-0.158806	0.873822	0.980311	0.00863629
CCL17	682.566	0.163536	0.163536	0	0	1.06795	0.15313	0.878296	0.980311	0.00863629
CD37	3825	0.0799927	0.0799927	0	0	0.70107	0.114101	0.909158	0.980311	0.00863629
CEACAM8	9.09536	-0.38543	0.38543	0	0	3.37738	-0.114121	0.909142	0.980311	0.00863629
CXCR2	800.602	0.118492	0.118492	0	0	0.871595	0.135948	0.891862	0.980311	0.00863629
FCGR2B	247.927	-0.154381	0.154381	0	0	1.31575	-0.117333	0.906596	0.980311	0.00863629
G6PD	10177.7	-0.106645	0.106645	0	0	0.770384	-0.138431	0.8899	0.980311	0.00863629
GZMH	632.509	0.120871	0.120871	0	0	0.907621	0.133173	0.894057	0.980311	0.00863629
IDO1	670.015	-0.111869	0.111869	0	0	0.867297	-0.128986	0.897369	0.980311	0.00863629
IFIT1	3521.46	0.0864718	0.0864718	0	0	0.768128	0.112575	0.910368	0.980311	0.00863629
IL10RA	4529.39	-0.0720563	0.0720563	0	0	0.648752	-0.111069	0.911562	0.980311	0.00863629
ISG20	2681.54	-0.0911188	0.0911188	0	0	0.669181	-0.136165	0.891691	0.980311	0.00863629
KIAA0101	2401	0.107949	0.107949	0	0	0.860777	0.125408	0.9002	0.980311	0.00863629
OAS2	6733.59	0.0971134	0.0971134	0	0	0.711447	0.136501	0.891425	0.980311	0.00863629
TUBB	30805.9	-0.07416	0.07416	0	0	0.626601	-0.118353	0.905788	0.980311	0.00863629
TYROBP	66267.5	-0.0812019	0.0812019	0	0	0.721891	-0.112485	0.910439	0.980311	0.00863629
ADORA2A	407.748	-0.0477871	0.0477871	0	0	0.867908	-0.0550602	0.956091	0.980357	0.00861564
CD163	9302.1	-0.04111	0.04111	0	0	0.768506	-0.0534934	0.957339	0.980357	0.00861564
CD4	3751.99	-0.0514257	0.0514257	0	0	0.701359	-0.0733229	0.941549	0.980357	0.00861564
FCER1G	14711.3	-0.0494894	0.0494894	0	0	0.693406	-0.0713714	0.943102	0.980357	0.00861564
GATA3	467.314	-0.0813501	0.0813501	0	0	0.864497	-0.0941012	0.925029	0.980357	0.00861564
HLA-E	52123.9	0.0402167	0.0402167	0	0	0.600542	0.0669673	0.946608	0.980357	0.00861564
IFI44L	3224.24	0.0479499	0.0479499	0	0	0.800416	0.0599062	0.95223	0.980357	0.00861564
IGSF6	1237.93	0.0784124	0.0784124	0	0	0.750856	0.104431	0.916828	0.980357	0.00861564
IL7R	5713.78	0.0388311	0.0388311	0	0	0.70474	0.0550999	0.956059	0.980357	0.00861564
ITGAM	2266.6	0.0362852	0.0362852	0	0	0.679923	0.0533666	0.95744	0.980357	0.00861564
LAPTM5	18403.5	0.0647334	0.0647334	0	0	0.717426	0.0902301	0.928104	0.980357	0.00861564
MAGEA3	188.493	-0.148352	0.148352	0	0	1.74519	-0.0850059	0.932257	0.980357	0.00861564
MAGEA4	2.31641	0.224109	0.224109	0	0	3.45187	0.064924	0.948235	0.980357	0.00861564
SDHA	8598.55	-0.0681452	0.0681452	0	0	0.713216	-0.0955464	0.923881	0.980357	0.00861564
SNAI1	767.057	0.0755106	0.0755106	0	0	0.868044	0.0869894	0.93068	0.980357	0.00861564
TAGAP	1382.74	0.0524553	0.0524553	0	0	0.813865	0.0644521	0.94861	0.980357	0.00861564
TARP	522.708	0.095774	0.095774	0	0	1.08853	0.0879849	0.929889	0.980357	0.00861564
TLR9	308.861	0.0773305	0.0773305	0	0	1.24886	0.0619208	0.950626	0.980357	0.00861564
IFIT3	1783.71	0.0273622	0.0273622	0	0	0.769873	0.0355412	0.971648	0.988743	0.00491674
IRS1	6776.28	-0.0270208	0.0270208	0	0	0.702064	-0.0384876	0.969299	0.988743	0.00491674
KLRK1	2208.91	-0.0224175	0.0224175	0	0	0.670628	-0.0334275	0.973334	0.988743	0.00491674
HLA-DOB	729.142	0.0323937	0.0323937	0	0	1.24531	0.0260126	0.979247	0.989528	0.00457187
ICOSLG	2117.49	0.0194318	0.0194318	0	0	0.699	0.0277994	0.977822	0.989528	0.00457187
HLA-DQB2	193.012	-0.0119668	0.0119668	0	0	1.25452	-0.00953896	0.992389	0.997571	0.00105605
IL21	8.91965	-0.0427441	0.0427441	0	0	3.38178	-0.0126395	0.989915	0.997571	0.00105605
ICAM1	5745.84	-0.0037403	0.0037403	0	0	0.614057	-0.00609113	0.99514	0.997732	0.000986306
HLA-DQA2	32.1405	-0.00617268	0.00617268	0	0	3.06008	-0.00201716	0.998391	0.998391	0.000699544
GAGE1	0	NA	#VALUE!	#VALUE!	#VALUE!	NA	NA	NA	NA	#VALUE!
GAGE13	0	NA	#VALUE!	#VALUE!	#VALUE!	NA	NA	NA	NA	#VALUE!
GAGE2C	0	NA	#VALUE!	#VALUE!	#VALUE!	NA	NA	NA	NA	#VALUE!
IL17F	0	NA	#VALUE!	#VALUE!	#VALUE!	NA	NA	NA	NA	#VALUE!
IL22	0	NA	#VALUE!	#VALUE!	#VALUE!	NA	NA	NA	NA	#VALUE!
KIR2DL1	0	NA	#VALUE!	#VALUE!	#VALUE!	NA	NA	NA	NA	#VALUE!
MAGEA1	0	NA	#VALUE!	#VALUE!	#VALUE!	NA	NA	NA	NA	#VALUE!
MAGEA10	0	NA	#VALUE!	#VALUE!	#VALUE!	NA	NA	NA	NA	#VALUE!
MLANA	0	NA	#VALUE!	#VALUE!	#VALUE!	NA	NA	NA	NA	#VALUE!
SSX2	0	NA	#VALUE!	#VALUE!	#VALUE!	NA	NA	NA	NA	#VALUE!

## Sheet: Table S10
Supplementary Table S10. DESeq2 results: PD-L1 or TMB DEGs in pre- and post-treatment samples
	baseMean	log2FoldChange	|log2FoldChange|	FC >= 1,5	FC >= 2	lfcSE	stat	pvalue	padj	minus_log10_padj	BIOMARKER	TIMEPOINT
GAGE1	71.2831	35.4989	35.4989	1	1	3.15372	11.2562	2.1587e-29	8.41891e-27	26.0747	PD-L1	PRE-TREATMENT
CD274	1662.48	1.63945	1.63945	1	0	0.439173	3.73304	0.00018918	0.0368901	1.43309	PD-L1	PRE-TREATMENT
NCR1	77.5399	2.37222	2.37222	1	1	0.703238	3.37328	0.000742778	0.0965612	1.0152	PD-L1	PRE-TREATMENT
CD79A	3712.81	1.69574	1.69574	1	0	0.51987	3.26184	0.0011069	0.107923	0.966887	PD-L1	PRE-TREATMENT
GZMB	4153.55	1.79196	1.79196	1	0	0.573491	3.12466	0.00178012	0.138849	0.857457	PD-L1	PRE-TREATMENT
IRF4	4784.72	1.7514	1.7514	1	0	0.627672	2.7903	0.00526586	0.327716	0.484502	PD-L1	PRE-TREATMENT
LAG3	931.091	1.10502	1.10502	0	0	0.404988	2.72851	0.00636205	0.327716	0.484502	PD-L1	PRE-TREATMENT
SIT1	444.793	1.00828	1.00828	0	0	0.372019	2.71029	0.00672239	0.327716	0.484502	PD-L1	PRE-TREATMENT
CCL2	9198.37	-1.26908	1.26908	0	0	0.530231	-2.39344	0.0166913	0.34261	0.4652	PD-L1	PRE-TREATMENT
CCL5	4641.88	0.933813	0.933813	0	0	0.377815	2.47162	0.0134504	0.34261	0.4652	PD-L1	PRE-TREATMENT
CD47	11918.9	-0.720231	0.720231	0	0	0.29716	-2.42372	0.0153626	0.34261	0.4652	PD-L1	PRE-TREATMENT
EGR3	1177.2	1.25144	1.25144	0	0	0.516906	2.42101	0.0154773	0.34261	0.4652	PD-L1	PRE-TREATMENT
HLA-G	27.5342	4.44688	4.44688	1	1	1.70348	2.61047	0.00904172	0.34261	0.4652	PD-L1	PRE-TREATMENT
NKG7	5274.27	1.40065	1.40065	0	0	0.571855	2.44931	0.014313	0.34261	0.4652	PD-L1	PRE-TREATMENT
POLR2A	29135.5	-0.86913	0.86913	0	0	0.347455	-2.50141	0.0123699	0.34261	0.4652	PD-L1	PRE-TREATMENT
PTPN6	9095.05	-0.617725	0.617725	0	0	0.257273	-2.40105	0.016348	0.34261	0.4652	PD-L1	PRE-TREATMENT
SKAP2	2387.74	-0.872189	0.872189	0	0	0.345631	-2.52347	0.0116202	0.34261	0.4652	PD-L1	PRE-TREATMENT
SLAMF7	14592.6	1.26117	1.26117	0	0	0.49326	2.55681	0.0105638	0.34261	0.4652	PD-L1	PRE-TREATMENT
TLR7	657.226	-1.70755	1.70755	1	0	0.669079	-2.55208	0.0107081	0.34261	0.4652	PD-L1	PRE-TREATMENT
CCL20	2231.13	-1.66219	1.66219	1	0	0.727313	-2.28539	0.02229	0.367802	0.434386	PD-L1	PRE-TREATMENT
CD38	2724.97	1.20365	1.20365	0	0	0.522574	2.30331	0.0212616	0.367802	0.434386	PD-L1	PRE-TREATMENT
GNLY	5574.17	1.43378	1.43378	0	0	0.632027	2.26853	0.0232967	0.367802	0.434386	PD-L1	PRE-TREATMENT
IDO1	3553.07	1.55194	1.55194	1	0	0.690094	2.24888	0.0245201	0.367802	0.434386	PD-L1	PRE-TREATMENT
MAGEA12	54.7287	4.76807	4.76807	1	1	2.06788	2.30578	0.021123	0.367802	0.434386	PD-L1	PRE-TREATMENT
NTN3	66.0524	-2.15877	2.15877	1	1	0.954635	-2.26136	0.0237371	0.367802	0.434386	PD-L1	PRE-TREATMENT
PRF1	672.165	1.074	1.074	0	0	0.464551	2.31192	0.0207823	0.367802	0.434386	PD-L1	PRE-TREATMENT
CD63	48101.1	-0.90411	0.90411	0	0	0.411588	-2.19664	0.0280461	0.40511	0.392427	PD-L1	PRE-TREATMENT
FCGR3B	797.643	-1.33041	1.33041	0	0	0.618662	-2.15046	0.0315192	0.414015	0.382984	PD-L1	PRE-TREATMENT
IL6	1284.6	1.44581	1.44581	0	0	0.681849	2.12042	0.0339704	0.414015	0.382984	PD-L1	PRE-TREATMENT
POU2AF1	4648.43	1.29851	1.29851	0	0	0.611716	2.12274	0.0337756	0.414015	0.382984	PD-L1	PRE-TREATMENT
PTPN7	2863.44	0.95346	0.95346	0	0	0.444254	2.1462	0.0318568	0.414015	0.382984	PD-L1	PRE-TREATMENT
TNFRSF17	321.218	1.63013	1.63013	1	0	0.758908	2.14799	0.0317145	0.414015	0.382984	PD-L1	PRE-TREATMENT
EGR2	1643.43	0.813564	0.813564	0	0	0.388754	2.09275	0.0363717	0.429848	0.366685	PD-L1	PRE-TREATMENT
IL1A	1624.05	-2.31365	2.31365	1	1	1.11765	-2.0701	0.0384425	0.440958	0.355602	PD-L1	PRE-TREATMENT
TBX21	494.282	0.993561	0.993561	0	0	0.488281	2.03481	0.0418696	0.466547	0.331104	PD-L1	PRE-TREATMENT
NT5E	2714.43	-1.13459	1.13459	0	0	0.565425	-2.00661	0.0447909	0.485234	0.314049	PD-L1	PRE-TREATMENT
CXCL11	1665.5	1.26788	1.26788	0	0	0.637436	1.98903	0.0466982	0.492224	0.307837	PD-L1	PRE-TREATMENT
CORO1A	2550.27	0.588768	0.588768	0	0	0.303035	1.94291	0.0520274	0.525476	0.279447	PD-L1	PRE-TREATMENT
SELL	346.668	-0.751544	0.751544	0	0	0.387669	-1.93862	0.0525476	0.525476	0.279447	PD-L1	PRE-TREATMENT
IFNG	263.868	1.44576	1.44576	0	0	0.758128	1.90701	0.0565192	0.537622	0.269523	PD-L1	PRE-TREATMENT
IL23A	153.293	-1.27358	1.27358	0	0	0.666152	-1.91184	0.0558965	0.537622	0.269523	PD-L1	PRE-TREATMENT
ADGRE5	10204.5	0.710996	0.710996	0	0	0.382832	1.8572	0.0632828	0.542521	0.265583	PD-L1	PRE-TREATMENT
CD160	73.4843	1.38321	1.38321	0	0	0.772992	1.78942	0.0735473	0.542521	0.265583	PD-L1	PRE-TREATMENT
CD244	290.29	0.710768	0.710768	0	0	0.390475	1.82027	0.0687182	0.542521	0.265583	PD-L1	PRE-TREATMENT
CXCL9	11246	1.35303	1.35303	0	0	0.736863	1.83621	0.0663273	0.542521	0.265583	PD-L1	PRE-TREATMENT
CXCR6	529.771	0.823955	0.823955	0	0	0.458969	1.79523	0.0726173	0.542521	0.265583	PD-L1	PRE-TREATMENT
EBI3	272.017	0.907846	0.907846	0	0	0.509053	1.7834	0.0745206	0.542521	0.265583	PD-L1	PRE-TREATMENT
HLA-DQA1	9790.57	1.38228	1.38228	0	0	0.741094	1.86519	0.0621555	0.542521	0.265583	PD-L1	PRE-TREATMENT
IKZF1	11815.9	0.97287	0.97287	0	0	0.531235	1.83134	0.0670501	0.542521	0.265583	PD-L1	PRE-TREATMENT
IL10	341.846	-1.08465	1.08465	0	0	0.581677	-1.8647	0.0622241	0.542521	0.265583	PD-L1	PRE-TREATMENT
IL18	3655.52	-0.653873	0.653873	0	0	0.345608	-1.89195	0.0584976	0.542521	0.265583	PD-L1	PRE-TREATMENT
IL2RB	3166.28	0.823537	0.823537	0	0	0.462729	1.77974	0.0751183	0.542521	0.265583	PD-L1	PRE-TREATMENT
LRP1	15050.7	-0.725308	0.725308	0	0	0.394064	-1.84059	0.0656821	0.542521	0.265583	PD-L1	PRE-TREATMENT
MRC1	7569.38	-1.01335	1.01335	0	0	0.559421	-1.81143	0.0700741	0.542521	0.265583	PD-L1	PRE-TREATMENT
CBLB	6518.87	-0.665951	0.665951	0	0	0.386278	-1.72402	0.0847041	0.550252	0.259439	PD-L1	PRE-TREATMENT
CD83	1731.64	-0.765984	0.765984	0	0	0.441584	-1.73463	0.0828065	0.550252	0.259439	PD-L1	PRE-TREATMENT
CXCL10	7794.9	1.02578	1.02578	0	0	0.595463	1.72266	0.0849506	0.550252	0.259439	PD-L1	PRE-TREATMENT
GZMA	1942.69	0.785864	0.785864	0	0	0.45903	1.71201	0.0868948	0.550252	0.259439	PD-L1	PRE-TREATMENT
ICOSLG	1791.1	-0.698542	0.698542	0	0	0.408776	-1.70887	0.0874759	0.550252	0.259439	PD-L1	PRE-TREATMENT
IRS1	4945.85	-0.749656	0.749656	0	0	0.429705	-1.74458	0.0810576	0.550252	0.259439	PD-L1	PRE-TREATMENT
ITGAX	2990.32	-0.757998	0.757998	0	0	0.432908	-1.75094	0.0799558	0.550252	0.259439	PD-L1	PRE-TREATMENT
PYGL	9693.65	-0.975365	0.975365	0	0	0.563628	-1.73051	0.0835389	0.550252	0.259439	PD-L1	PRE-TREATMENT
CD53	275.274	1.11701	1.11701	0	0	0.658679	1.69583	0.0899177	0.556634	0.254431	PD-L1	PRE-TREATMENT
CD28	1025.3	-0.738309	0.738309	0	0	0.448774	-1.64517	0.0999351	0.576283	0.239365	PD-L1	PRE-TREATMENT
CD6	1310.12	0.558119	0.558119	0	0	0.342046	1.63171	0.102741	0.576283	0.239365	PD-L1	PRE-TREATMENT
CIITA	11638.2	-0.650601	0.650601	0	0	0.396434	-1.64113	0.10077	0.576283	0.239365	PD-L1	PRE-TREATMENT
HLA-F	691.435	0.619349	0.619349	0	0	0.380337	1.62842	0.103435	0.576283	0.239365	PD-L1	PRE-TREATMENT
MAGEC2	12.4282	5.21951	5.21951	1	1	3.15709	1.65327	0.0982769	0.576283	0.239365	PD-L1	PRE-TREATMENT
MKI67	3159.68	-0.691301	0.691301	0	0	0.417461	-1.65597	0.0977287	0.576283	0.239365	PD-L1	PRE-TREATMENT
PTPRC	1210.1	0.643744	0.643744	0	0	0.391428	1.6446	0.100052	0.576283	0.239365	PD-L1	PRE-TREATMENT
CD3D	2874.86	0.599596	0.599596	0	0	0.380012	1.57783	0.114604	0.580461	0.236227	PD-L1	PRE-TREATMENT
FAS	3213.65	-0.39276	0.39276	0	0	0.242793	-1.61767	0.105733	0.580461	0.236227	PD-L1	PRE-TREATMENT
IL2RG	2715.71	0.486754	0.486754	0	0	0.308233	1.57918	0.114295	0.580461	0.236227	PD-L1	PRE-TREATMENT
ITGB1	41838.7	-0.737941	0.737941	0	0	0.466347	-1.58239	0.113561	0.580461	0.236227	PD-L1	PRE-TREATMENT
MAGEA10	27.0867	-3.45962	3.45962	1	1	2.17895	-1.58775	0.112344	0.580461	0.236227	PD-L1	PRE-TREATMENT
NCF1	6871.65	0.697419	0.697419	0	0	0.438513	1.59042	0.111741	0.580461	0.236227	PD-L1	PRE-TREATMENT
TNFSF18	329.019	-1.69894	1.69894	1	0	1.06568	-1.59423	0.110885	0.580461	0.236227	PD-L1	PRE-TREATMENT
PTPRCAP	29.2183	2.14873	2.14873	1	1	1.36815	1.57053	0.116292	0.581459	0.235481	PD-L1	PRE-TREATMENT
B3GAT1	68.9357	1.97151	1.97151	1	0	1.27118	1.55093	0.120919	0.596944	0.224067	PD-L1	PRE-TREATMENT
LMNA	23726.8	-0.618953	0.618953	0	0	0.411106	-1.50558	0.132175	0.644354	0.190876	PD-L1	PRE-TREATMENT
ALOX15B	452.425	1.17315	1.17315	0	0	0.846342	1.38614	0.165704	0.649211	0.187614	PD-L1	PRE-TREATMENT
CCR1	1503.32	-0.636183	0.636183	0	0	0.46544	-1.36684	0.171675	0.649211	0.187614	PD-L1	PRE-TREATMENT
CCR5	2718.42	0.59297	0.59297	0	0	0.413951	1.43247	0.152011	0.649211	0.187614	PD-L1	PRE-TREATMENT
CD1C	508.499	-0.832187	0.832187	0	0	0.599717	-1.38763	0.165249	0.649211	0.187614	PD-L1	PRE-TREATMENT
CD22	648.933	-0.58421	0.58421	0	0	0.429666	-1.35968	0.17393	0.649211	0.187614	PD-L1	PRE-TREATMENT
CD3E	5466.75	0.553345	0.553345	0	0	0.408979	1.35299	0.176059	0.649211	0.187614	PD-L1	PRE-TREATMENT
CD48	962.309	0.56027	0.56027	0	0	0.403656	1.38799	0.165141	0.649211	0.187614	PD-L1	PRE-TREATMENT
CD86	1325.17	-0.599343	0.599343	0	0	0.441995	-1.356	0.175101	0.649211	0.187614	PD-L1	PRE-TREATMENT
CD8A	2085.5	0.638004	0.638004	0	0	0.473186	1.34832	0.177557	0.649211	0.187614	PD-L1	PRE-TREATMENT
CDK1	3648.51	-0.787845	0.787845	0	0	0.549656	-1.43334	0.15176	0.649211	0.187614	PD-L1	PRE-TREATMENT
CDKN3	2623.32	-0.624548	0.624548	0	0	0.439175	-1.42209	0.154999	0.649211	0.187614	PD-L1	PRE-TREATMENT
FASLG	580.242	0.802104	0.802104	0	0	0.543319	1.4763	0.139862	0.649211	0.187614	PD-L1	PRE-TREATMENT
IFI35	2947.17	0.479808	0.479808	0	0	0.35083	1.36764	0.171425	0.649211	0.187614	PD-L1	PRE-TREATMENT
IFITM2	10889.2	-0.565473	0.565473	0	0	0.415882	-1.35969	0.173927	0.649211	0.187614	PD-L1	PRE-TREATMENT
IKZF2	1474.89	-0.64674	0.64674	0	0	0.459713	-1.40683	0.159476	0.649211	0.187614	PD-L1	PRE-TREATMENT
IL17F	2.38523	4.51462	4.51462	1	1	3.16173	1.42789	0.153323	0.649211	0.187614	PD-L1	PRE-TREATMENT
ITGAL	2366.19	0.614831	0.614831	0	0	0.430667	1.42763	0.153399	0.649211	0.187614	PD-L1	PRE-TREATMENT
ITK	943.615	0.490639	0.490639	0	0	0.355874	1.37869	0.167992	0.649211	0.187614	PD-L1	PRE-TREATMENT
NCAM1	379.938	0.830646	0.830646	0	0	0.581326	1.42888	0.153038	0.649211	0.187614	PD-L1	PRE-TREATMENT
NCR3	63.168	1.75997	1.75997	1	0	1.26088	1.39582	0.162767	0.649211	0.187614	PD-L1	PRE-TREATMENT
NRP1	10733.8	-0.577846	0.577846	0	0	0.418123	-1.382	0.166971	0.649211	0.187614	PD-L1	PRE-TREATMENT
PDCD1	341.211	0.799369	0.799369	0	0	0.560401	1.42642	0.153746	0.649211	0.187614	PD-L1	PRE-TREATMENT
PTGS2	1710.91	-0.752499	0.752499	0	0	0.563061	-1.33644	0.181405	0.649211	0.187614	PD-L1	PRE-TREATMENT
TFRC	21386.5	0.902605	0.902605	0	0	0.670509	1.34615	0.178254	0.649211	0.187614	PD-L1	PRE-TREATMENT
TLR9	320.624	0.596857	0.596857	0	0	0.410772	1.45301	0.14622	0.649211	0.187614	PD-L1	PRE-TREATMENT
TNFRSF4	495.158	0.48901	0.48901	0	0	0.351102	1.39279	0.163685	0.649211	0.187614	PD-L1	PRE-TREATMENT
TP63	151.393	1.4737	1.4737	0	0	1.09491	1.34595	0.178317	0.649211	0.187614	PD-L1	PRE-TREATMENT
VCAM1	4357.74	-0.849585	0.849585	0	0	0.587934	-1.44504	0.148448	0.649211	0.187614	PD-L1	PRE-TREATMENT
ZEB1	3174.59	-0.472042	0.472042	0	0	0.353241	-1.33632	0.181446	0.649211	0.187614	PD-L1	PRE-TREATMENT
CD27	517.734	0.602891	0.602891	0	0	0.457816	1.31688	0.187877	0.660895	0.179868	PD-L1	PRE-TREATMENT
JCHAIN	13782.5	0.936514	0.936514	0	0	0.711519	1.31622	0.188101	0.660895	0.179868	PD-L1	PRE-TREATMENT
CCL4	3988.44	0.571532	0.571532	0	0	0.438055	1.3047	0.191994	0.668551	0.174865	PD-L1	PRE-TREATMENT
CD79B	484.02	0.612159	0.612159	0	0	0.47719	1.28284	0.199548	0.682663	0.165794	PD-L1	PRE-TREATMENT
LILRB1	605.344	0.634867	0.634867	0	0	0.493646	1.28608	0.198416	0.682663	0.165794	PD-L1	PRE-TREATMENT
MAPK1	7542.18	0.724694	0.724694	0	0	0.571803	1.26738	0.205018	0.695279	0.157841	PD-L1	PRE-TREATMENT
BCL2L11	1965.56	-0.456843	0.456843	0	0	0.398972	-1.14505	0.252188	0.713819	0.146412	PD-L1	PRE-TREATMENT
CCL22	742.486	-0.921115	0.921115	0	0	0.743553	-1.2388	0.215419	0.713819	0.146412	PD-L1	PRE-TREATMENT
CD19	362.875	0.845541	0.845541	0	0	0.707905	1.19443	0.23231	0.713819	0.146412	PD-L1	PRE-TREATMENT
CD33	1361.05	-0.396904	0.396904	0	0	0.323368	-1.22741	0.21967	0.713819	0.146412	PD-L1	PRE-TREATMENT
CD40	1439.8	0.318734	0.318734	0	0	0.271236	1.17512	0.239947	0.713819	0.146412	PD-L1	PRE-TREATMENT
DDX58	10621.6	-0.525476	0.525476	0	0	0.444187	-1.18301	0.236806	0.713819	0.146412	PD-L1	PRE-TREATMENT
EFNA4	1178.58	-0.577238	0.577238	0	0	0.479738	-1.20324	0.228885	0.713819	0.146412	PD-L1	PRE-TREATMENT
GBP1	12029.2	0.507953	0.507953	0	0	0.439986	1.15448	0.248305	0.713819	0.146412	PD-L1	PRE-TREATMENT
GUSB	6818.47	-0.501496	0.501496	0	0	0.402469	-1.24605	0.212746	0.713819	0.146412	PD-L1	PRE-TREATMENT
HERC6	2059.18	-0.625886	0.625886	0	0	0.536896	-1.16575	0.243716	0.713819	0.146412	PD-L1	PRE-TREATMENT
IFI6	20868.2	0.766523	0.766523	0	0	0.669979	1.1441	0.252582	0.713819	0.146412	PD-L1	PRE-TREATMENT
IGF1R	32697.9	-0.537658	0.537658	0	0	0.466803	-1.15179	0.249409	0.713819	0.146412	PD-L1	PRE-TREATMENT
IKZF4	193.915	-0.510472	0.510472	0	0	0.442214	-1.15435	0.248355	0.713819	0.146412	PD-L1	PRE-TREATMENT
KLRD1	890.319	0.629032	0.629032	0	0	0.53461	1.17662	0.239348	0.713819	0.146412	PD-L1	PRE-TREATMENT
KRT7	18721.7	-0.994373	0.994373	0	0	0.828893	-1.19964	0.230279	0.713819	0.146412	PD-L1	PRE-TREATMENT
LRG1	1568.41	-0.840355	0.840355	0	0	0.700053	-1.20042	0.229978	0.713819	0.146412	PD-L1	PRE-TREATMENT
LY9	119.77	0.921714	0.921714	0	0	0.775288	1.18887	0.234492	0.713819	0.146412	PD-L1	PRE-TREATMENT
MAGEA3	237.745	2.29649	2.29649	1	1	2.00452	1.14566	0.251938	0.713819	0.146412	PD-L1	PRE-TREATMENT
MMP2	55727.7	-0.707753	0.707753	0	0	0.60806	-1.16395	0.244443	0.713819	0.146412	PD-L1	PRE-TREATMENT
OAS2	8493.53	0.541728	0.541728	0	0	0.47064	1.15105	0.249714	0.713819	0.146412	PD-L1	PRE-TREATMENT
S100A8	41451.8	-1.14525	1.14525	0	0	0.956633	-1.19717	0.231241	0.713819	0.146412	PD-L1	PRE-TREATMENT
S100A9	30245.5	-0.919428	0.919428	0	0	0.792124	-1.16071	0.245759	0.713819	0.146412	PD-L1	PRE-TREATMENT
TNFSF4	160.754	-0.748492	0.748492	0	0	0.621405	-1.20451	0.228391	0.713819	0.146412	PD-L1	PRE-TREATMENT
PTK7	14319.2	-0.618214	0.618214	0	0	0.545486	-1.13333	0.257076	0.721293	0.141888	PD-L1	PRE-TREATMENT
C1QB	41937.2	0.523066	0.523066	0	0	0.465025	1.12481	0.260668	0.726148	0.138975	PD-L1	PRE-TREATMENT
AIF1	7303.5	-0.482171	0.482171	0	0	0.454571	-1.06072	0.288819	0.727	0.138466	PD-L1	PRE-TREATMENT
CD14	11038.1	-0.536898	0.536898	0	0	0.50634	-1.06035	0.288985	0.727	0.138466	PD-L1	PRE-TREATMENT
CD163	8703.7	-0.51532	0.51532	0	0	0.469307	-1.09804	0.272185	0.727	0.138466	PD-L1	PRE-TREATMENT
CD247	1141.3	0.490116	0.490116	0	0	0.454502	1.07836	0.280873	0.727	0.138466	PD-L1	PRE-TREATMENT
CD69	1001.88	0.621802	0.621802	0	0	0.571403	1.0882	0.276506	0.727	0.138466	PD-L1	PRE-TREATMENT
CXCL13	2801.68	0.741502	0.741502	0	0	0.693817	1.06873	0.285192	0.727	0.138466	PD-L1	PRE-TREATMENT
CXCR2	808.433	-0.762536	0.762536	0	0	0.684837	-1.11346	0.265513	0.727	0.138466	PD-L1	PRE-TREATMENT
IDO2	32.1767	1.66417	1.66417	1	0	1.54994	1.0737	0.282955	0.727	0.138466	PD-L1	PRE-TREATMENT
IFNB1	889.106	0.853632	0.853632	0	0	0.777363	1.09811	0.272156	0.727	0.138466	PD-L1	PRE-TREATMENT
IGSF6	1557.88	0.523061	0.523061	0	0	0.487411	1.07314	0.283208	0.727	0.138466	PD-L1	PRE-TREATMENT
IRF1	7299.33	0.389438	0.389438	0	0	0.365839	1.06451	0.287099	0.727	0.138466	PD-L1	PRE-TREATMENT
KLRF1	74.1938	-0.722323	0.722323	0	0	0.674446	-1.07099	0.284175	0.727	0.138466	PD-L1	PRE-TREATMENT
MIF	28826.1	0.633251	0.633251	0	0	0.586425	1.07985	0.280209	0.727	0.138466	PD-L1	PRE-TREATMENT
TIGIT	636.169	0.584334	0.584334	0	0	0.553154	1.05637	0.2908	0.727	0.138466	PD-L1	PRE-TREATMENT
TLR3	369.321	-0.471289	0.471289	0	0	0.426101	-1.10605	0.268705	0.727	0.138466	PD-L1	PRE-TREATMENT
TNFSF10	10001.1	-0.613262	0.613262	0	0	0.562163	-1.0909	0.275319	0.727	0.138466	PD-L1	PRE-TREATMENT
MPO	53.1212	-1.01663	1.01663	0	0	0.968549	-1.04964	0.293884	0.730031	0.136659	PD-L1	PRE-TREATMENT
ABCF1	13516.7	-0.368921	0.368921	0	0	0.359758	-1.02547	0.305142	0.733249	0.134748	PD-L1	PRE-TREATMENT
IL22	0.991708	3.25227	3.25227	1	1	3.17328	1.02489	0.305414	0.733249	0.134748	PD-L1	PRE-TREATMENT
ISG20	4126.39	0.403063	0.403063	0	0	0.393485	1.02434	0.305674	0.733249	0.134748	PD-L1	PRE-TREATMENT
MAGEA1	26.0465	2.55483	2.55483	1	1	2.49651	1.02336	0.306137	0.733249	0.134748	PD-L1	PRE-TREATMENT
MAGEA4	129.993	-2.90597	2.90597	1	1	2.84153	-1.02268	0.306461	0.733249	0.134748	PD-L1	PRE-TREATMENT
TNFRSF9	1144.91	0.605167	0.605167	0	0	0.582117	1.0396	0.298527	0.733249	0.134748	PD-L1	PRE-TREATMENT
CSF1R	2643.33	-0.384573	0.384573	0	0	0.384201	-1.00097	0.316842	0.753465	0.122937	PD-L1	PRE-TREATMENT
PECAM1	6459.4	0.603234	0.603234	0	0	0.605667	0.995983	0.319258	0.754611	0.122277	PD-L1	PRE-TREATMENT
CXCR4	7117.97	-0.388351	0.388351	0	0	0.399239	-0.972729	0.330688	0.77087	0.113019	PD-L1	PRE-TREATMENT
FCGR2B	399.378	0.762259	0.762259	0	0	0.786381	0.969326	0.332383	0.77087	0.113019	PD-L1	PRE-TREATMENT
IFIT2	4021.52	-0.533916	0.533916	0	0	0.556298	-0.959767	0.337173	0.77087	0.113019	PD-L1	PRE-TREATMENT
JAML	546.996	-0.425421	0.425421	0	0	0.441687	-0.963172	0.335461	0.77087	0.113019	PD-L1	PRE-TREATMENT
KIAA0101	1223.54	0.605425	0.605425	0	0	0.631882	0.95813	0.337997	0.77087	0.113019	PD-L1	PRE-TREATMENT
PRDM1	8877.37	0.413277	0.413277	0	0	0.428859	0.963668	0.335213	0.77087	0.113019	PD-L1	PRE-TREATMENT
PVR	5522.93	-0.390172	0.390172	0	0	0.413922	-0.942623	0.345874	0.784248	0.105547	PD-L1	PRE-TREATMENT
NECTIN2	1668.14	-0.353848	0.353848	0	0	0.377764	-0.936689	0.348918	0.786579	0.104258	PD-L1	PRE-TREATMENT
BTLA	313.383	0.448254	0.448254	0	0	0.494872	0.905798	0.365043	0.79641	0.0988633	PD-L1	PRE-TREATMENT
CEACAM1	1171.41	-0.594332	0.594332	0	0	0.659407	-0.901313	0.367422	0.79641	0.0988633	PD-L1	PRE-TREATMENT
DGAT2	431.591	-0.568646	0.568646	0	0	0.620648	-0.916212	0.359556	0.79641	0.0988633	PD-L1	PRE-TREATMENT
IL1B	2032.56	0.532685	0.532685	0	0	0.586448	0.908324	0.363707	0.79641	0.0988633	PD-L1	PRE-TREATMENT
LYZ	74874	0.597061	0.597061	0	0	0.659818	0.904887	0.365525	0.79641	0.0988633	PD-L1	PRE-TREATMENT
SNAI1	492.166	-0.504737	0.504737	0	0	0.560179	-0.901027	0.367574	0.79641	0.0988633	PD-L1	PRE-TREATMENT
TOP2A	8277.79	-0.460257	0.460257	0	0	0.510799	-0.901053	0.36756	0.79641	0.0988633	PD-L1	PRE-TREATMENT
RPS6	92488.6	-0.352866	0.352866	0	0	0.400202	-0.88172	0.377928	0.814321	0.0892046	PD-L1	PRE-TREATMENT
ARG1	25.3618	-1.91337	1.91337	1	0	2.51183	-0.761744	0.446213	0.830044	0.080899	PD-L1	PRE-TREATMENT
AXL	2200.47	-0.306409	0.306409	0	0	0.358036	-0.855805	0.392106	0.830044	0.080899	PD-L1	PRE-TREATMENT
BUB1	3129.53	-0.353068	0.353068	0	0	0.453367	-0.778768	0.436116	0.830044	0.080899	PD-L1	PRE-TREATMENT
CCR6	202.759	0.418601	0.418601	0	0	0.513766	0.814771	0.415203	0.830044	0.080899	PD-L1	PRE-TREATMENT
CD209	2807.97	-0.371214	0.371214	0	0	0.494205	-0.751133	0.452573	0.830044	0.080899	PD-L1	PRE-TREATMENT
CD80	3737.57	-0.25986	0.25986	0	0	0.339197	-0.766104	0.443615	0.830044	0.080899	PD-L1	PRE-TREATMENT
CLEC4C	88.5969	1.07677	1.07677	0	0	1.27357	0.845475	0.397846	0.830044	0.080899	PD-L1	PRE-TREATMENT
CTLA4	391.323	0.278944	0.278944	0	0	0.36235	0.769819	0.441407	0.830044	0.080899	PD-L1	PRE-TREATMENT
EIF2AK2	17493.1	-0.398334	0.398334	0	0	0.461142	-0.8638	0.387698	0.830044	0.080899	PD-L1	PRE-TREATMENT
GAGE12J	1.29359	-2.39982	2.39982	1	1	3.13039	-0.766621	0.443307	0.830044	0.080899	PD-L1	PRE-TREATMENT
GAGE13	0.631426	2.59748	2.59748	1	1	3.1846	0.815638	0.414707	0.830044	0.080899	PD-L1	PRE-TREATMENT
GRAP2	1254.87	0.31138	0.31138	0	0	0.405762	0.767396	0.442846	0.830044	0.080899	PD-L1	PRE-TREATMENT
GZMH	1102.93	0.421342	0.421342	0	0	0.547955	0.768935	0.441932	0.830044	0.080899	PD-L1	PRE-TREATMENT
HGF	538.315	-0.637194	0.637194	0	0	0.746421	-0.853666	0.39329	0.830044	0.080899	PD-L1	PRE-TREATMENT
IFNA17	1737.44	0.589121	0.589121	0	0	0.774958	0.760197	0.447137	0.830044	0.080899	PD-L1	PRE-TREATMENT
IKZF3	2605.53	0.329701	0.329701	0	0	0.426969	0.772189	0.440003	0.830044	0.080899	PD-L1	PRE-TREATMENT
IL7	361.855	-0.28381	0.28381	0	0	0.367583	-0.772098	0.440057	0.830044	0.080899	PD-L1	PRE-TREATMENT
ITGAM	2078.7	-0.271893	0.271893	0	0	0.353285	-0.769613	0.44153	0.830044	0.080899	PD-L1	PRE-TREATMENT
KIR2DL2	2.52733	2.59051	2.59051	1	1	3.18475	0.813412	0.415982	0.830044	0.080899	PD-L1	PRE-TREATMENT
KIR2DL3	14.2715	1.80676	1.80676	1	0	2.38372	0.757959	0.448476	0.830044	0.080899	PD-L1	PRE-TREATMENT
KREMEN1	3585.65	0.536669	0.536669	0	0	0.695667	0.771445	0.440443	0.830044	0.080899	PD-L1	PRE-TREATMENT
LEXM	132.879	-0.659242	0.659242	0	0	0.831277	-0.793048	0.42775	0.830044	0.080899	PD-L1	PRE-TREATMENT
MAPK14	6147.59	-0.298151	0.298151	0	0	0.368294	-0.809545	0.418202	0.830044	0.080899	PD-L1	PRE-TREATMENT
NFATC1	415.481	-0.408362	0.408362	0	0	0.512155	-0.797341	0.425253	0.830044	0.080899	PD-L1	PRE-TREATMENT
PDCD1LG2	1712.17	0.364625	0.364625	0	0	0.434431	0.839315	0.401293	0.830044	0.080899	PD-L1	PRE-TREATMENT
PTEN	10168.5	-0.282521	0.282521	0	0	0.367475	-0.768818	0.442001	0.830044	0.080899	PD-L1	PRE-TREATMENT
SH2D1B	135.423	0.554426	0.554426	0	0	0.739361	0.749872	0.453332	0.830044	0.080899	PD-L1	PRE-TREATMENT
STAT4	691.783	-0.255538	0.255538	0	0	0.339898	-0.751809	0.452166	0.830044	0.080899	PD-L1	PRE-TREATMENT
TARP	774.982	0.297106	0.297106	0	0	0.357346	0.831424	0.405734	0.830044	0.080899	PD-L1	PRE-TREATMENT
TCF7	975.105	-0.366431	0.366431	0	0	0.44912	-0.815885	0.414566	0.830044	0.080899	PD-L1	PRE-TREATMENT
TNFAIP8	1665.91	-0.282484	0.282484	0	0	0.36986	-0.76376	0.44501	0.830044	0.080899	PD-L1	PRE-TREATMENT
VTCN1	190.465	-1.01503	1.01503	0	0	1.19628	-0.848488	0.396166	0.830044	0.080899	PD-L1	PRE-TREATMENT
CD8B	759.034	0.338345	0.338345	0	0	0.454273	0.744805	0.45639	0.831738	0.0800134	PD-L1	PRE-TREATMENT
CD2	5733.63	0.306665	0.306665	0	0	0.418667	0.732481	0.463875	0.832647	0.0795392	PD-L1	PRE-TREATMENT
FCGR1A	2603.87	-0.485616	0.485616	0	0	0.66961	-0.725222	0.468316	0.832647	0.0795392	PD-L1	PRE-TREATMENT
GAGE2C	5.23389	2.27137	2.27137	1	1	3.08112	0.737188	0.461008	0.832647	0.0795392	PD-L1	PRE-TREATMENT
M6PR	12894	-0.291952	0.291952	0	0	0.403824	-0.72297	0.469698	0.832647	0.0795392	PD-L1	PRE-TREATMENT
MADCAM1	26.8317	1.30237	1.30237	0	0	1.79345	0.726185	0.467726	0.832647	0.0795392	PD-L1	PRE-TREATMENT
ZAP70	924.846	0.301806	0.301806	0	0	0.416024	0.725452	0.468175	0.832647	0.0795392	PD-L1	PRE-TREATMENT
AKT1	9002.87	-0.247412	0.247412	0	0	0.370052	-0.668587	0.503759	0.857696	0.0666664	PD-L1	PRE-TREATMENT
BCL6	16144.5	-0.299928	0.299928	0	0	0.521928	-0.574654	0.565526	0.857696	0.0666664	PD-L1	PRE-TREATMENT
BRCA1	1250.6	-0.385032	0.385032	0	0	0.561436	-0.685798	0.492841	0.857696	0.0666664	PD-L1	PRE-TREATMENT
C1QA	23857.9	0.299967	0.299967	0	0	0.528789	0.567272	0.570529	0.857696	0.0666664	PD-L1	PRE-TREATMENT
CCR4	363.091	-0.274398	0.274398	0	0	0.415058	-0.661107	0.508544	0.857696	0.0666664	PD-L1	PRE-TREATMENT
CD37	4441.96	0.24328	0.24328	0	0	0.399355	0.609182	0.542404	0.857696	0.0666664	PD-L1	PRE-TREATMENT
CD3G	3199.82	0.231184	0.231184	0	0	0.389774	0.593124	0.553098	0.857696	0.0666664	PD-L1	PRE-TREATMENT
CD52	11582.5	0.208635	0.208635	0	0	0.358414	0.582107	0.560495	0.857696	0.0666664	PD-L1	PRE-TREATMENT
CD70	105.941	0.459121	0.459121	0	0	0.762846	0.601852	0.547272	0.857696	0.0666664	PD-L1	PRE-TREATMENT
CDKN2A	12666.2	0.55031	0.55031	0	0	0.85891	0.640707	0.521713	0.857696	0.0666664	PD-L1	PRE-TREATMENT
CSF2RB	11713.8	0.163127	0.163127	0	0	0.25601	0.637189	0.524002	0.857696	0.0666664	PD-L1	PRE-TREATMENT
CTAG2	3.73376	1.83688	1.83688	1	0	2.9254	0.627907	0.530065	0.857696	0.0666664	PD-L1	PRE-TREATMENT
CX3CL1	1432.78	-0.389133	0.389133	0	0	0.568336	-0.684688	0.493541	0.857696	0.0666664	PD-L1	PRE-TREATMENT
CXCR3	37.1301	0.62884	0.62884	0	0	1.0344	0.607929	0.543235	0.857696	0.0666664	PD-L1	PRE-TREATMENT
CXCR5	144.756	0.375696	0.375696	0	0	0.543858	0.690798	0.489693	0.857696	0.0666664	PD-L1	PRE-TREATMENT
EGFR	18287.8	0.412088	0.412088	0	0	0.725773	0.567792	0.570176	0.857696	0.0666664	PD-L1	PRE-TREATMENT
FCRLA	184.213	0.487403	0.487403	0	0	0.832806	0.585254	0.558377	0.857696	0.0666664	PD-L1	PRE-TREATMENT
FOXO1	7241	-0.236573	0.236573	0	0	0.36327	-0.651233	0.514896	0.857696	0.0666664	PD-L1	PRE-TREATMENT
FOXP3	544.066	0.247725	0.247725	0	0	0.396639	0.624559	0.532261	0.857696	0.0666664	PD-L1	PRE-TREATMENT
GADD45GIP1	11967.7	-0.283775	0.283775	0	0	0.476469	-0.59558	0.551456	0.857696	0.0666664	PD-L1	PRE-TREATMENT
GAGE10	9.74211	-1.37398	1.37398	0	0	2.24928	-0.610857	0.541295	0.857696	0.0666664	PD-L1	PRE-TREATMENT
GPR18	202.797	0.366332	0.366332	0	0	0.593846	0.61688	0.537314	0.857696	0.0666664	PD-L1	PRE-TREATMENT
HLA-B	15636	0.900164	0.900164	0	0	1.54191	0.583798	0.559356	0.857696	0.0666664	PD-L1	PRE-TREATMENT
HLA-DMA	11857.2	-0.286879	0.286879	0	0	0.434677	-0.659981	0.509266	0.857696	0.0666664	PD-L1	PRE-TREATMENT
HLA-F-AS1	32.1192	-0.701203	0.701203	0	0	1.05297	-0.665928	0.505457	0.857696	0.0666664	PD-L1	PRE-TREATMENT
HMBS	1179.96	-0.247531	0.247531	0	0	0.429138	-0.57681	0.564068	0.857696	0.0666664	PD-L1	PRE-TREATMENT
ICAM1	9138.96	0.279162	0.279162	0	0	0.493737	0.565406	0.571798	0.857696	0.0666664	PD-L1	PRE-TREATMENT
ID2	7791.52	-0.249359	0.249359	0	0	0.433427	-0.57532	0.565075	0.857696	0.0666664	PD-L1	PRE-TREATMENT
IFI44L	4974.66	0.351843	0.351843	0	0	0.562203	0.62583	0.531427	0.857696	0.0666664	PD-L1	PRE-TREATMENT
IL12B	37.0672	-0.652906	0.652906	0	0	1.09088	-0.598511	0.549499	0.857696	0.0666664	PD-L1	PRE-TREATMENT
IL15	791.748	-0.229248	0.229248	0	0	0.370386	-0.618945	0.535953	0.857696	0.0666664	PD-L1	PRE-TREATMENT
IL17A	23.4615	1.37827	1.37827	0	0	2.03586	0.676996	0.498409	0.857696	0.0666664	PD-L1	PRE-TREATMENT
ITGA1	5622.09	-0.23897	0.23897	0	0	0.401658	-0.59496	0.55187	0.857696	0.0666664	PD-L1	PRE-TREATMENT
LAPTM5	16078.3	-0.323082	0.323082	0	0	0.515727	-0.626459	0.531014	0.857696	0.0666664	PD-L1	PRE-TREATMENT
MMP9	14342.1	0.386113	0.386113	0	0	0.680985	0.566992	0.57072	0.857696	0.0666664	PD-L1	PRE-TREATMENT
STAT1	28962.5	0.234573	0.234573	0	0	0.383376	0.611861	0.540629	0.857696	0.0666664	PD-L1	PRE-TREATMENT
TBP	2952.31	-0.251525	0.251525	0	0	0.440937	-0.570433	0.568384	0.857696	0.0666664	PD-L1	PRE-TREATMENT
TDO2	1282.91	0.316734	0.316734	0	0	0.545783	0.58033	0.561692	0.857696	0.0666664	PD-L1	PRE-TREATMENT
TLR8	569.551	-0.356592	0.356592	0	0	0.575331	-0.619804	0.535387	0.857696	0.0666664	PD-L1	PRE-TREATMENT
TYROBP	63101.8	-0.283749	0.283749	0	0	0.417981	-0.678857	0.497229	0.857696	0.0666664	PD-L1	PRE-TREATMENT
C10orf54	3640.47	-0.190065	0.190065	0	0	0.34918	-0.544318	0.586223	0.869023	0.0609687	PD-L1	PRE-TREATMENT
CCL21	4658.84	-0.46865	0.46865	0	0	0.865987	-0.541175	0.588387	0.869023	0.0609687	PD-L1	PRE-TREATMENT
ISG15	14300.6	0.387399	0.387399	0	0	0.710887	0.544951	0.585787	0.869023	0.0609687	PD-L1	PRE-TREATMENT
LAMP1	2457.44	-0.248257	0.248257	0	0	0.461337	-0.538126	0.59049	0.869023	0.0609687	PD-L1	PRE-TREATMENT
SAMHD1	6427.68	-0.17282	0.17282	0	0	0.314273	-0.549903	0.582386	0.869023	0.0609687	PD-L1	PRE-TREATMENT
CD4	3521.59	-0.226804	0.226804	0	0	0.461361	-0.491596	0.623005	0.884895	0.0531083	PD-L1	PRE-TREATMENT
FCGR3A	6181.22	-0.2454	0.2454	0	0	0.483012	-0.508063	0.61141	0.884895	0.0531083	PD-L1	PRE-TREATMENT
HLA-C	29028.7	0.379788	0.379788	0	0	0.74895	0.507094	0.612089	0.884895	0.0531083	PD-L1	PRE-TREATMENT
IL10RA	5454	0.173765	0.173765	0	0	0.343323	0.506127	0.612768	0.884895	0.0531083	PD-L1	PRE-TREATMENT
ITGAE	1062.61	0.159662	0.159662	0	0	0.312142	0.511504	0.608998	0.884895	0.0531083	PD-L1	PRE-TREATMENT
KLRG1	571.611	-0.223692	0.223692	0	0	0.43776	-0.510992	0.609357	0.884895	0.0531083	PD-L1	PRE-TREATMENT
PGF	1984.46	0.323031	0.323031	0	0	0.648913	0.497804	0.618622	0.884895	0.0531083	PD-L1	PRE-TREATMENT
PIK3CD	2324.44	-0.136992	0.136992	0	0	0.280913	-0.487668	0.625785	0.884895	0.0531083	PD-L1	PRE-TREATMENT
STAT5A	2068.94	0.155535	0.155535	0	0	0.319293	0.487124	0.62617	0.884895	0.0531083	PD-L1	PRE-TREATMENT
TNFRSF18	1238.69	-0.1969	0.1969	0	0	0.404283	-0.487035	0.626233	0.884895	0.0531083	PD-L1	PRE-TREATMENT
TUBB	27910.6	-0.181552	0.181552	0	0	0.368505	-0.492672	0.622244	0.884895	0.0531083	PD-L1	PRE-TREATMENT
KIR2DL1	0.469499	1.54184	1.54184	1	0	3.19971	0.48187	0.629898	0.88686	0.0521448	PD-L1	PRE-TREATMENT
CXCL8	11703.9	-0.300259	0.300259	0	0	0.656358	-0.457462	0.647339	0.892031	0.0496203	PD-L1	PRE-TREATMENT
FCER1G	13460.3	-0.241451	0.241451	0	0	0.515228	-0.468629	0.639335	0.892031	0.0496203	PD-L1	PRE-TREATMENT
HLA-DRA	75828.2	-0.251663	0.251663	0	0	0.548053	-0.459195	0.646094	0.892031	0.0496203	PD-L1	PRE-TREATMENT
LCK	49.1344	0.411955	0.411955	0	0	0.887266	0.464297	0.642435	0.892031	0.0496203	PD-L1	PRE-TREATMENT
RB1	4869.46	0.190567	0.190567	0	0	0.419083	0.454724	0.649308	0.892031	0.0496203	PD-L1	PRE-TREATMENT
SLAMF8	2731.32	-0.261724	0.261724	0	0	0.576048	-0.454344	0.649581	0.892031	0.0496203	PD-L1	PRE-TREATMENT
TNFSF13B	3169.24	0.203565	0.203565	0	0	0.432911	0.470225	0.638194	0.892031	0.0496203	PD-L1	PRE-TREATMENT
ZBTB46	264.669	-0.20947	0.20947	0	0	0.466121	-0.44939	0.653151	0.893785	0.048767	PD-L1	PRE-TREATMENT
CD1D	76.4337	0.266594	0.266594	0	0	0.613476	0.434563	0.66388	0.902241	0.0446774	PD-L1	PRE-TREATMENT
CD226	1689.35	0.150336	0.150336	0	0	0.346033	0.434457	0.663957	0.902241	0.0446774	PD-L1	PRE-TREATMENT
MTOR	6039.18	-0.158536	0.158536	0	0	0.370738	-0.427621	0.668927	0.905838	0.0429493	PD-L1	PRE-TREATMENT
IFIT3	2358.33	0.195094	0.195094	0	0	0.460128	0.424	0.671566	0.906265	0.0427446	PD-L1	PRE-TREATMENT
IFI27	7441.01	-0.289888	0.289888	0	0	0.699	-0.414719	0.678348	0.912261	0.0398809	PD-L1	PRE-TREATMENT
HIF1A	14188	-0.209677	0.209677	0	0	0.514087	-0.407863	0.683374	0.915862	0.0381699	PD-L1	PRE-TREATMENT
BCL2	1002.04	0.195462	0.195462	0	0	0.50765	0.385034	0.700212	0.920114	0.0361582	PD-L1	PRE-TREATMENT
BRCA2	2194.38	-0.21563	0.21563	0	0	0.557887	-0.386512	0.699118	0.920114	0.0361582	PD-L1	PRE-TREATMENT
CCL18	15365.9	0.263088	0.263088	0	0	0.68446	0.384372	0.700702	0.920114	0.0361582	PD-L1	PRE-TREATMENT
CXCL1	15604.1	-0.277472	0.277472	0	0	0.704246	-0.393999	0.693581	0.920114	0.0361582	PD-L1	PRE-TREATMENT
ICOS	197.632	0.137272	0.137272	0	0	0.351135	0.390939	0.695842	0.920114	0.0361582	PD-L1	PRE-TREATMENT
IL21	13.342	0.602323	0.602323	0	0	1.51275	0.398164	0.690509	0.920114	0.0361582	PD-L1	PRE-TREATMENT
IFIH1	2838.72	-0.184583	0.184583	0	0	0.500811	-0.368567	0.71245	0.932401	0.0303971	PD-L1	PRE-TREATMENT
IL4	1.9811	-1.07754	1.07754	0	0	3.08574	-0.349198	0.72694	0.939487	0.0271091	PD-L1	PRE-TREATMENT
ITGB7	2198.03	0.132964	0.132964	0	0	0.381498	0.348532	0.727441	0.939487	0.0271091	PD-L1	PRE-TREATMENT
KLF2	3553.9	-0.145263	0.145263	0	0	0.413401	-0.351385	0.7253	0.939487	0.0271091	PD-L1	PRE-TREATMENT
STAT6	14554.3	-0.130726	0.130726	0	0	0.375162	-0.348452	0.7275	0.939487	0.0271091	PD-L1	PRE-TREATMENT
ADORA2A	869.906	0.0988153	0.0988153	0	0	0.460517	0.214575	0.830099	0.940268	0.0267482	PD-L1	PRE-TREATMENT
BST2	28218.6	-0.120287	0.120287	0	0	0.362194	-0.332106	0.739809	0.940268	0.0267482	PD-L1	PRE-TREATMENT
CA4	44.6808	0.34771	0.34771	0	0	1.16526	0.298396	0.765401	0.940268	0.0267482	PD-L1	PRE-TREATMENT
CCL3	1807.44	-0.208098	0.208098	0	0	0.611933	-0.340066	0.733807	0.940268	0.0267482	PD-L1	PRE-TREATMENT
CCNB2	3438.92	0.136753	0.136753	0	0	0.526945	0.259521	0.795233	0.940268	0.0267482	PD-L1	PRE-TREATMENT
CCR7	618.244	0.133283	0.133283	0	0	0.457319	0.291444	0.770712	0.940268	0.0267482	PD-L1	PRE-TREATMENT
CD40LG	191.184	-0.127579	0.127579	0	0	0.567265	-0.224902	0.822056	0.940268	0.0267482	PD-L1	PRE-TREATMENT
CD74	17896.2	-0.18023	0.18023	0	0	0.541507	-0.33283	0.739262	0.940268	0.0267482	PD-L1	PRE-TREATMENT
CMKLR1	14.2984	0.598257	0.598257	0	0	1.91895	0.311762	0.755221	0.940268	0.0267482	PD-L1	PRE-TREATMENT
CRTAM	409.144	0.132575	0.132575	0	0	0.605565	0.218927	0.826707	0.940268	0.0267482	PD-L1	PRE-TREATMENT
CTSS	10077.2	-0.13092	0.13092	0	0	0.495485	-0.264227	0.791605	0.940268	0.0267482	PD-L1	PRE-TREATMENT
DMBT1	2011.75	0.440758	0.440758	0	0	1.51554	0.290826	0.771185	0.940268	0.0267482	PD-L1	PRE-TREATMENT
EOMES	614.834	0.158272	0.158272	0	0	0.550301	0.287609	0.773646	0.940268	0.0267482	PD-L1	PRE-TREATMENT
FUT4	4233.08	-0.0958822	0.0958822	0	0	0.438867	-0.218477	0.827058	0.940268	0.0267482	PD-L1	PRE-TREATMENT
FYB	7135.71	0.100798	0.100798	0	0	0.393006	0.25648	0.797581	0.940268	0.0267482	PD-L1	PRE-TREATMENT
GZMK	365.151	0.170216	0.170216	0	0	0.69455	0.245074	0.806399	0.940268	0.0267482	PD-L1	PRE-TREATMENT
HLA-A	37502.3	0.451773	0.451773	0	0	1.55015	0.291438	0.770716	0.940268	0.0267482	PD-L1	PRE-TREATMENT
HLA-DPA1	60528.9	-0.28035	0.28035	0	0	0.889867	-0.315048	0.752726	0.940268	0.0267482	PD-L1	PRE-TREATMENT
HLA-DQA2	10.8849	-0.291197	0.291197	0	0	1.42404	-0.204486	0.837974	0.940268	0.0267482	PD-L1	PRE-TREATMENT
HLA-DRB1	101895	0.178001	0.178001	0	0	0.570432	0.312046	0.755005	0.940268	0.0267482	PD-L1	PRE-TREATMENT
HLA-E	71244.3	-0.0644657	0.0644657	0	0	0.312591	-0.20623	0.836611	0.940268	0.0267482	PD-L1	PRE-TREATMENT
IFIT1	3979.28	-0.158727	0.158727	0	0	0.746065	-0.212753	0.83152	0.940268	0.0267482	PD-L1	PRE-TREATMENT
IL12A	346.359	0.178591	0.178591	0	0	0.677705	0.263523	0.792147	0.940268	0.0267482	PD-L1	PRE-TREATMENT
IL2	6.76669	0.64844	0.64844	0	0	2.95818	0.219202	0.826493	0.940268	0.0267482	PD-L1	PRE-TREATMENT
IL2RA	1282.45	-0.0909226	0.0909226	0	0	0.446686	-0.203549	0.838706	0.940268	0.0267482	PD-L1	PRE-TREATMENT
KLRK1	4731.02	0.102565	0.102565	0	0	0.42839	0.23942	0.81078	0.940268	0.0267482	PD-L1	PRE-TREATMENT
LAMP3	2074.22	-0.187589	0.187589	0	0	0.676911	-0.277125	0.781684	0.940268	0.0267482	PD-L1	PRE-TREATMENT
LCN2	77204.7	0.165754	0.165754	0	0	0.783658	0.211513	0.832487	0.940268	0.0267482	PD-L1	PRE-TREATMENT
LILRB2	1207.63	0.112237	0.112237	0	0	0.332082	0.337981	0.735378	0.940268	0.0267482	PD-L1	PRE-TREATMENT
LST1	1132.86	0.115003	0.115003	0	0	0.509699	0.225629	0.82149	0.940268	0.0267482	PD-L1	PRE-TREATMENT
MAD2L1	1913.56	0.107992	0.107992	0	0	0.450506	0.239712	0.810554	0.940268	0.0267482	PD-L1	PRE-TREATMENT
MX1	19036.7	-0.204645	0.204645	0	0	0.686803	-0.297968	0.765728	0.940268	0.0267482	PD-L1	PRE-TREATMENT
MYC	7587.04	-0.159348	0.159348	0	0	0.683558	-0.233116	0.815671	0.940268	0.0267482	PD-L1	PRE-TREATMENT
NFKBIA	12291.2	0.074665	0.074665	0	0	0.367516	0.203162	0.839009	0.940268	0.0267482	PD-L1	PRE-TREATMENT
NOTCH3	15473.5	-0.15679	0.15679	0	0	0.531387	-0.295059	0.767949	0.940268	0.0267482	PD-L1	PRE-TREATMENT
PMEL	108.149	-0.199649	0.199649	0	0	0.806898	-0.247428	0.804577	0.940268	0.0267482	PD-L1	PRE-TREATMENT
SH2D1A	393.427	0.170811	0.170811	0	0	0.571573	0.298844	0.765059	0.940268	0.0267482	PD-L1	PRE-TREATMENT
SNAI2	4203.11	0.162864	0.162864	0	0	0.681734	0.238896	0.811186	0.940268	0.0267482	PD-L1	PRE-TREATMENT
TAP1	19187.6	0.0965303	0.0965303	0	0	0.408864	0.236094	0.81336	0.940268	0.0267482	PD-L1	PRE-TREATMENT
TGFB1	21630.4	-0.0869052	0.0869052	0	0	0.326513	-0.266161	0.790115	0.940268	0.0267482	PD-L1	PRE-TREATMENT
TNF	703.122	0.107787	0.107787	0	0	0.376597	0.286213	0.774715	0.940268	0.0267482	PD-L1	PRE-TREATMENT
TNFRSF14	3828.17	-0.0934609	0.0934609	0	0	0.309037	-0.302426	0.762327	0.940268	0.0267482	PD-L1	PRE-TREATMENT
TNFSF14	100.394	-0.319202	0.319202	0	0	1.23324	-0.258833	0.795764	0.940268	0.0267482	PD-L1	PRE-TREATMENT
TNFSF9	162.045	0.212072	0.212072	0	0	0.733564	0.289098	0.772506	0.940268	0.0267482	PD-L1	PRE-TREATMENT
TWIST1	1843.09	-0.137041	0.137041	0	0	0.630891	-0.217219	0.828038	0.940268	0.0267482	PD-L1	PRE-TREATMENT
XAGE1B	45.9875	-0.705024	0.705024	0	0	2.1487	-0.328116	0.742824	0.940268	0.0267482	PD-L1	PRE-TREATMENT
VEGFA	38190.6	-0.113006	0.113006	0	0	0.569697	-0.198361	0.842762	0.941769	0.0260557	PD-L1	PRE-TREATMENT
OAS1	12306.1	-0.123336	0.123336	0	0	0.633112	-0.194808	0.845543	0.942176	0.0258678	PD-L1	PRE-TREATMENT
ENTPD1	4548.47	0.0677203	0.0677203	0	0	0.371488	0.182295	0.855351	0.947691	0.0233335	PD-L1	PRE-TREATMENT
NOS2	105.408	0.280816	0.280816	0	0	1.51696	0.185118	0.853136	0.947691	0.0233335	PD-L1	PRE-TREATMENT
SDHA	8651.76	0.0713276	0.0713276	0	0	0.425444	0.167654	0.866855	0.957715	0.0187636	PD-L1	PRE-TREATMENT
CYBB	9647.74	0.0668329	0.0668329	0	0	0.429676	0.155543	0.876393	0.9588	0.0182719	PD-L1	PRE-TREATMENT
HAVCR2	3684.27	-0.0650832	0.0650832	0	0	0.422831	-0.153922	0.877671	0.9588	0.0182719	PD-L1	PRE-TREATMENT
ID3	1746.27	0.100929	0.100929	0	0	0.649462	0.155404	0.876503	0.9588	0.0182719	PD-L1	PRE-TREATMENT
IFITM1	28076.1	0.0590952	0.0590952	0	0	0.382649	0.154437	0.877265	0.9588	0.0182719	PD-L1	PRE-TREATMENT
CD68	26363.5	0.0676878	0.0676878	0	0	0.461167	0.146775	0.88331	0.960025	0.0177175	PD-L1	PRE-TREATMENT
SRGN	9575.87	0.0554294	0.0554294	0	0	0.378975	0.146261	0.883715	0.960025	0.0177175	PD-L1	PRE-TREATMENT
HLA-DOA	1354.96	-0.0730459	0.0730459	0	0	0.587018	-0.124436	0.90097	0.971396	0.0126038	PD-L1	PRE-TREATMENT
IRF9	16033.5	-0.0375854	0.0375854	0	0	0.304159	-0.123571	0.901655	0.971396	0.0126038	PD-L1	PRE-TREATMENT
OAS3	4581.88	-0.061495	0.061495	0	0	0.497525	-0.123602	0.901631	0.971396	0.0126038	PD-L1	PRE-TREATMENT
TRIM29	32820.5	-0.159394	0.159394	0	0	1.34246	-0.118733	0.905487	0.972837	0.0119597	PD-L1	PRE-TREATMENT
FOXM1	4704.65	0.0608584	0.0608584	0	0	0.552922	0.110067	0.912356	0.973604	0.0116177	PD-L1	PRE-TREATMENT
G6PD	8232.07	-0.0705505	0.0705505	0	0	0.669691	-0.105348	0.9161	0.973604	0.0116177	PD-L1	PRE-TREATMENT
HLA-DMB	1523.6	0.125545	0.125545	0	0	1.19295	0.105239	0.916186	0.973604	0.0116177	PD-L1	PRE-TREATMENT
PSMB9	5530.99	0.0401516	0.0401516	0	0	0.35794	0.112174	0.910685	0.973604	0.0116177	PD-L1	PRE-TREATMENT
CD44	1977.59	0.0871583	0.0871583	0	0	0.933046	0.0934127	0.925576	0.975226	0.0108949	PD-L1	PRE-TREATMENT
HLA-DOB	910.577	0.0452785	0.0452785	0	0	0.499099	0.0907205	0.927715	0.975226	0.0108949	PD-L1	PRE-TREATMENT
MS4A1	254.609	-0.0789545	0.0789545	0	0	0.816838	-0.0966587	0.922997	0.975226	0.0108949	PD-L1	PRE-TREATMENT
RORC	1094.29	-0.0828397	0.0828397	0	0	0.870557	-0.0951571	0.92419	0.975226	0.0108949	PD-L1	PRE-TREATMENT
CCL17	627.112	0.0548124	0.0548124	0	0	0.782069	0.0700865	0.944125	0.987155	0.0056148	PD-L1	PRE-TREATMENT
GATA3	656.22	0.0322122	0.0322122	0	0	0.451304	0.0713758	0.943099	0.987155	0.0056148	PD-L1	PRE-TREATMENT
CCR2	521.744	0.0334011	0.0334011	0	0	0.640736	0.0521292	0.958426	0.994354	0.00245899	PD-L1	PRE-TREATMENT
CD276	2453.95	-0.0272023	0.0272023	0	0	0.535014	-0.0508441	0.95945	0.994354	0.00245899	PD-L1	PRE-TREATMENT
HLA-DPB1	25973.9	0.0307847	0.0307847	0	0	0.545841	0.0563987	0.955024	0.994354	0.00245899	PD-L1	PRE-TREATMENT
HLA-DQB2	152.957	0.0487172	0.0487172	0	0	1.00166	0.0486367	0.961209	0.994354	0.00245899	PD-L1	PRE-TREATMENT
MELK	3636.36	-0.0227678	0.0227678	0	0	0.50911	-0.0447208	0.96433	0.994943	0.00220159	PD-L1	PRE-TREATMENT
BATF	3656.31	-0.0137346	0.0137346	0	0	0.370134	-0.0371072	0.970399	0.996542	0.00150437	PD-L1	PRE-TREATMENT
CX3CR1	113.393	-0.0139357	0.0139357	0	0	0.569641	-0.0244639	0.980483	0.996542	0.00150437	PD-L1	PRE-TREATMENT
IL13	10.9335	0.00880477	0.00880477	0	0	2.0316	0.00433392	0.996542	0.996542	0.00150437	PD-L1	PRE-TREATMENT
IL3RA	1158.14	0.00404781	0.00404781	0	0	0.396337	0.0102131	0.991851	0.996542	0.00150437	PD-L1	PRE-TREATMENT
IL7R	4921.58	-0.00815914	0.00815914	0	0	0.548016	-0.0148885	0.988121	0.996542	0.00150437	PD-L1	PRE-TREATMENT
ITGB2	5922.44	0.00348835	0.00348835	0	0	0.462112	0.00754871	0.993977	0.996542	0.00150437	PD-L1	PRE-TREATMENT
KLRB1	1069.87	0.00381915	0.00381915	0	0	0.520347	0.00733962	0.994144	0.996542	0.00150437	PD-L1	PRE-TREATMENT
KRT5	183307	-0.0158926	0.0158926	0	0	1.53835	-0.010331	0.991757	0.996542	0.00150437	PD-L1	PRE-TREATMENT
PIK3CA	4121.36	0.0125867	0.0125867	0	0	0.536237	0.0234723	0.981274	0.996542	0.00150437	PD-L1	PRE-TREATMENT
PTPN11	11616.9	-0.0132381	0.0132381	0	0	0.452897	-0.0292298	0.976681	0.996542	0.00150437	PD-L1	PRE-TREATMENT
STAT3	17738.8	0.0090275	0.0090275	0	0	0.310337	0.0290894	0.976793	0.996542	0.00150437	PD-L1	PRE-TREATMENT
TAGAP	2447.29	-0.0119575	0.0119575	0	0	0.488776	-0.0244642	0.980482	0.996542	0.00150437	PD-L1	PRE-TREATMENT
BAGE	0	0	0	0	0	0	0	1	NA	#VALUE!	PD-L1	PRE-TREATMENT
CEACAM8	0	0	0	0	0	0	0	1	NA	#VALUE!	PD-L1	PRE-TREATMENT
CTAG1B	0	0	0	0	0	0	0	1	NA	#VALUE!	PD-L1	PRE-TREATMENT
MLANA	0	NA	#VALUE!	#VALUE!	#VALUE!	NA	NA	NA	NA	#VALUE!	PD-L1	PRE-TREATMENT
SSX2	0	NA	#VALUE!	#VALUE!	#VALUE!	NA	NA	NA	NA	#VALUE!	PD-L1	PRE-TREATMENT
CDK1	1375.43	-3.56309	3.56309	1	1	0.670367	-5.31514	1.06577e-07	3.87942e-05	4.41123	PD-L1	POST-TREATMENT
FOXM1	975.899	-4.06355	4.06355	1	1	0.852002	-4.76941	1.84763e-06	0.000336268	3.47331	PD-L1	POST-TREATMENT
MKI67	841.066	-3.70869	3.70869	1	1	0.826298	-4.48832	7.1786e-06	0.000871004	3.05998	PD-L1	POST-TREATMENT
MIF	8493.47	-1.43522	1.43522	0	0	0.325521	-4.409	1.03849e-05	0.000945023	3.02456	PD-L1	POST-TREATMENT
KIAA0101	604.998	-3.82277	3.82277	1	1	0.881993	-4.33424	1.46264e-05	0.00106481	2.97273	PD-L1	POST-TREATMENT
BUB1	530.466	-2.5702	2.5702	1	1	0.607532	-4.23057	2.33104e-05	0.0011238	2.94931	PD-L1	POST-TREATMENT
CDKN2A	878.751	-2.57874	2.57874	1	1	0.611432	-4.21753	2.46989e-05	0.0011238	2.94931	PD-L1	POST-TREATMENT
ISG15	3345.46	-2.05306	2.05306	1	1	0.484576	-4.23682	2.26708e-05	0.0011238	2.94931	PD-L1	POST-TREATMENT
HMBS	585.315	-1.93862	1.93862	1	0	0.471361	-4.11281	3.90877e-05	0.00158088	2.8011	PD-L1	POST-TREATMENT
TOP2A	1050.06	-3.07615	3.07615	1	1	0.783357	-3.92688	8.60561e-05	0.00313244	2.50412	PD-L1	POST-TREATMENT
G6PD	3620.85	-2.01413	2.01413	1	1	0.519424	-3.87762	0.000105483	0.00349054	2.45711	PD-L1	POST-TREATMENT
CDKN3	658.185	-3.10845	3.10845	1	1	0.836107	-3.71776	0.000200998	0.00609695	2.21489	PD-L1	POST-TREATMENT
IFI27	5910.24	-1.82431	1.82431	1	0	0.495876	-3.67897	0.000234181	0.00655708	2.18329	PD-L1	POST-TREATMENT
KRT5	5954.55	-3.53804	3.53804	1	1	0.971183	-3.64302	0.000269461	0.00700598	2.15453	PD-L1	POST-TREATMENT
CCNB2	379.536	-3.04622	3.04622	1	1	0.875738	-3.47846	0.000504305	0.0114729	1.94033	PD-L1	POST-TREATMENT
XAGE1B	828.535	2.67319	2.67319	1	1	0.765912	3.4902	0.000482653	0.0114729	1.94033	PD-L1	POST-TREATMENT
IL7R	8617.54	1.17103	1.17103	0	0	0.350971	3.33654	0.000848284	0.0172105	1.76421	PD-L1	POST-TREATMENT
TNFRSF18	599.956	-2.2272	2.2272	1	1	0.667699	-3.33563	0.000851066	0.0172105	1.76421	PD-L1	POST-TREATMENT
STAT1	9789.36	-1.09403	1.09403	0	0	0.333155	-3.28385	0.00102399	0.0196175	1.70736	PD-L1	POST-TREATMENT
MELK	645.457	-2.68392	2.68392	1	1	0.852713	-3.14751	0.0016467	0.0299699	1.52331	PD-L1	POST-TREATMENT
BST2	21948.5	-1.16964	1.16964	0	0	0.376806	-3.10408	0.0019087	0.0330841	1.48038	PD-L1	POST-TREATMENT
BRCA1	263.207	-2.1602	2.1602	1	1	0.70289	-3.07332	0.00211695	0.0350258	1.45561	PD-L1	POST-TREATMENT
OAS3	1457.63	-1.48026	1.48026	0	0	0.487592	-3.03585	0.00239857	0.03796	1.42067	PD-L1	POST-TREATMENT
CXCL10	1879.04	-1.10233	1.10233	0	0	0.365756	-3.01383	0.00257971	0.0391256	1.40754	PD-L1	POST-TREATMENT
CEACAM1	315.858	-1.93599	1.93599	1	0	0.691181	-2.80098	0.00509473	0.0722932	1.1409	PD-L1	POST-TREATMENT
PTK7	5612.68	-1.03874	1.03874	0	0	0.371425	-2.79663	0.0051638	0.0722932	1.1409	PD-L1	POST-TREATMENT
EFNA4	429.744	-1.37543	1.37543	0	0	0.503817	-2.73002	0.00633314	0.0853801	1.06864	PD-L1	POST-TREATMENT
LCN2	14166	-1.62797	1.62797	1	0	0.604446	-2.69333	0.00707415	0.0919639	1.03638	PD-L1	POST-TREATMENT
IL15	419.043	1.08018	1.08018	0	0	0.405499	2.66382	0.0077258	0.0969721	1.01335	PD-L1	POST-TREATMENT
MAD2L1	1050.19	-1.6222	1.6222	1	0	0.61341	-2.64456	0.00817972	0.0992473	1.00328	PD-L1	POST-TREATMENT
DDX58	4436.15	-0.912609	0.912609	0	0	0.367256	-2.48494	0.0129574	0.149641	0.82495	PD-L1	POST-TREATMENT
PGF	563.908	-1.10934	1.10934	0	0	0.447398	-2.47954	0.0131552	0.149641	0.82495	PD-L1	POST-TREATMENT
CXCL9	4559.82	-1.25149	1.25149	0	0	0.516037	-2.42519	0.0153005	0.159126	0.79826	PD-L1	POST-TREATMENT
IFI35	1498.12	-0.685139	0.685139	0	0	0.280645	-2.4413	0.0146346	0.159126	0.79826	PD-L1	POST-TREATMENT
PYGL	3108.43	-0.830121	0.830121	0	0	0.341172	-2.43315	0.0149682	0.159126	0.79826	PD-L1	POST-TREATMENT
OAS2	3342.16	-0.820374	0.820374	0	0	0.340441	-2.40974	0.0159639	0.161412	0.792063	PD-L1	POST-TREATMENT
KLRD1	944.898	0.764052	0.764052	0	0	0.320814	2.3816	0.0172375	0.16958	0.770626	PD-L1	POST-TREATMENT
TAP1	6050.23	-0.563369	0.563369	0	0	0.240173	-2.34568	0.0189923	0.181926	0.740105	PD-L1	POST-TREATMENT
ADGRE5	11447.7	0.636053	0.636053	0	0	0.272715	2.3323	0.0196847	0.183724	0.735833	PD-L1	POST-TREATMENT
S100A8	5830.55	-1.28299	1.28299	0	0	0.573085	-2.23874	0.0251726	0.229071	0.640031	PD-L1	POST-TREATMENT
TUBB	16381.6	-0.788247	0.788247	0	0	0.356742	-2.20957	0.027135	0.240905	0.618153	PD-L1	POST-TREATMENT
CA4	2190.89	1.60322	1.60322	1	0	0.77176	2.07736	0.0377682	0.306547	0.513503	PD-L1	POST-TREATMENT
CD14	9282.97	-0.558162	0.558162	0	0	0.270042	-2.06694	0.0387394	0.306547	0.513503	PD-L1	POST-TREATMENT
KRT7	6918.79	0.966209	0.966209	0	0	0.466282	2.07216	0.0382509	0.306547	0.513503	PD-L1	POST-TREATMENT
M6PR	9794.64	-0.534855	0.534855	0	0	0.257803	-2.07466	0.0380177	0.306547	0.513503	PD-L1	POST-TREATMENT
TFRC	7040.72	-0.816287	0.816287	0	0	0.393979	-2.07191	0.0382742	0.306547	0.513503	PD-L1	POST-TREATMENT
GADD45GIP1	5941.89	-0.581792	0.581792	0	0	0.284653	-2.04386	0.0409674	0.317279	0.498558	PD-L1	POST-TREATMENT
CXCL13	3828.59	-1.22777	1.22777	0	0	0.604838	-2.02992	0.0423649	0.320909	0.493618	PD-L1	POST-TREATMENT
LAG3	503.829	-0.801503	0.801503	0	0	0.39846	-2.0115	0.0442724	0.320909	0.493618	PD-L1	POST-TREATMENT
S100A9	5664.75	-1.10822	1.10822	0	0	0.552724	-2.00501	0.0449625	0.320909	0.493618	PD-L1	POST-TREATMENT
TBP	1238.92	-0.703185	0.703185	0	0	0.34993	-2.0095	0.044484	0.320909	0.493618	PD-L1	POST-TREATMENT
MRC1	10450.2	0.690757	0.690757	0	0	0.350049	1.97331	0.04846	0.33922	0.469519	PD-L1	POST-TREATMENT
CCL20	2203.2	1.37036	1.37036	0	0	0.700867	1.95524	0.0505551	0.347209	0.45941	PD-L1	POST-TREATMENT
BRCA2	510.23	-1.1497	1.1497	0	0	0.607155	-1.89359	0.058279	0.381964	0.417978	PD-L1	POST-TREATMENT
CCL22	438.966	-0.834088	0.834088	0	0	0.440957	-1.89154	0.0585526	0.381964	0.417978	PD-L1	POST-TREATMENT
ICAM1	14617.5	0.918797	0.918797	0	0	0.486147	1.88996	0.0587636	0.381964	0.417978	PD-L1	POST-TREATMENT
RPS6	88376.9	-0.530705	0.530705	0	0	0.285306	-1.86013	0.0628675	0.40147	0.396347	PD-L1	POST-TREATMENT
HLA-E	85648.3	0.393136	0.393136	0	0	0.212531	1.84979	0.0643443	0.403816	0.393817	PD-L1	POST-TREATMENT
PTPRC	2784.74	0.57812	0.57812	0	0	0.319305	1.81056	0.0702094	0.433156	0.363355	PD-L1	POST-TREATMENT
KLF2	11453.8	0.683808	0.683808	0	0	0.380538	1.79695	0.072343	0.433264	0.363247	PD-L1	POST-TREATMENT
NECTIN2	512.637	-0.808224	0.808224	0	0	0.452061	-1.78787	0.0737977	0.433264	0.363247	PD-L1	POST-TREATMENT
TNFRSF9	533.193	-1.14053	1.14053	0	0	0.636175	-1.79279	0.0730071	0.433264	0.363247	PD-L1	POST-TREATMENT
CD209	1111.9	-1.01031	1.01031	0	0	0.568477	-1.77721	0.0755331	0.436414	0.360102	PD-L1	POST-TREATMENT
VCAM1	2776.23	-0.895135	0.895135	0	0	0.506247	-1.76818	0.0770309	0.438113	0.358413	PD-L1	POST-TREATMENT
MAPK1	5562.91	-0.448363	0.448363	0	0	0.25526	-1.75649	0.0790039	0.442422	0.354163	PD-L1	POST-TREATMENT
CD22	1241.34	0.911055	0.911055	0	0	0.526813	1.72937	0.0837428	0.461854	0.335495	PD-L1	POST-TREATMENT
PMEL	43.5569	-2.00758	2.00758	1	1	1.17074	-1.71479	0.086383	0.469304	0.328545	PD-L1	POST-TREATMENT
LAMP1	2222.54	-0.493428	0.493428	0	0	0.290754	-1.69706	0.0896848	0.47312	0.325029	PD-L1	POST-TREATMENT
MTOR	2390.14	-0.590131	0.590131	0	0	0.347702	-1.69723	0.0896522	0.47312	0.325029	PD-L1	POST-TREATMENT
FAS	2878.11	0.606711	0.606711	0	0	0.360555	1.68272	0.0924303	0.474938	0.323363	PD-L1	POST-TREATMENT
IFIT3	788.664	-0.787908	0.787908	0	0	0.468536	-1.68164	0.092639	0.474938	0.323363	PD-L1	POST-TREATMENT
CXCL8	9628.64	-1.14008	1.14008	0	0	0.693088	-1.64493	0.0999842	0.494834	0.30554	PD-L1	POST-TREATMENT
HIF1A	7552.82	-0.596734	0.596734	0	0	0.360612	-1.65478	0.0979686	0.494834	0.30554	PD-L1	POST-TREATMENT
STAT4	550.499	0.997259	0.997259	0	0	0.607359	1.64196	0.100598	0.494834	0.30554	PD-L1	POST-TREATMENT
GZMH	974.83	-0.497734	0.497734	0	0	0.308503	-1.61339	0.106661	0.517661	0.285955	PD-L1	POST-TREATMENT
POLR2A	13793.7	-0.612223	0.612223	0	0	0.381658	-1.60411	0.108689	0.520562	0.283527	PD-L1	POST-TREATMENT
CD52	34726.9	0.478844	0.478844	0	0	0.300186	1.59516	0.110677	0.523199	0.281333	PD-L1	POST-TREATMENT
DGAT2	259.718	-1.06405	1.06405	0	0	0.67165	-1.58423	0.113141	0.527992	0.277373	PD-L1	POST-TREATMENT
ITGA1	7050.37	0.530993	0.530993	0	0	0.339436	1.56434	0.117738	0.531354	0.274616	PD-L1	POST-TREATMENT
NFATC1	479.335	0.649714	0.649714	0	0	0.41439	1.56788	0.116909	0.531354	0.274616	PD-L1	POST-TREATMENT
PRF1	825.5	0.493128	0.493128	0	0	0.315663	1.5622	0.118241	0.531354	0.274616	PD-L1	POST-TREATMENT
CD19	556.369	0.966721	0.966721	0	0	0.62453	1.54792	0.121642	0.533465	0.272894	PD-L1	POST-TREATMENT
MX1	4282.31	-0.662959	0.662959	0	0	0.426653	-1.55386	0.120218	0.533465	0.272894	PD-L1	POST-TREATMENT
DMBT1	6362.35	1.10313	1.10313	0	0	0.717428	1.53763	0.12414	0.537564	0.26957	PD-L1	POST-TREATMENT
GBP1	8223.47	-0.420664	0.420664	0	0	0.27459	-1.53197	0.12553	0.537564	0.26957	PD-L1	POST-TREATMENT
IFNG	98.0251	-1.11196	1.11196	0	0	0.729979	-1.52327	0.127691	0.540459	0.267237	PD-L1	POST-TREATMENT
TARP	1231.84	0.6561	0.6561	0	0	0.435393	1.50691	0.131833	0.545308	0.263358	PD-L1	POST-TREATMENT
TP63	115.879	-1.33461	1.33461	0	0	0.884381	-1.50909	0.131277	0.545308	0.263358	PD-L1	POST-TREATMENT
AXL	1933.67	0.446897	0.446897	0	0	0.306508	1.45803	0.144833	0.553488	0.256891	PD-L1	POST-TREATMENT
BCL2L11	1146.95	-0.338711	0.338711	0	0	0.232757	-1.45521	0.145611	0.553488	0.256891	PD-L1	POST-TREATMENT
C10orf54	3465.44	0.338206	0.338206	0	0	0.230334	1.46833	0.142014	0.553488	0.256891	PD-L1	POST-TREATMENT
CD44	286.632	-1.01144	1.01144	0	0	0.691933	-1.46176	0.143808	0.553488	0.256891	PD-L1	POST-TREATMENT
IL2RB	1752.76	-0.499687	0.499687	0	0	0.344984	-1.44843	0.147496	0.553488	0.256891	PD-L1	POST-TREATMENT
LMNA	27701.6	0.54892	0.54892	0	0	0.378641	1.44971	0.147139	0.553488	0.256891	PD-L1	POST-TREATMENT
TBX21	408.065	0.573342	0.573342	0	0	0.393858	1.45571	0.145473	0.553488	0.256891	PD-L1	POST-TREATMENT
TWIST1	471.685	-0.91631	0.91631	0	0	0.629767	-1.455	0.145669	0.553488	0.256891	PD-L1	POST-TREATMENT
ZAP70	650.539	0.839231	0.839231	0	0	0.563708	1.48877	0.136548	0.553488	0.256891	PD-L1	POST-TREATMENT
CCL17	836.922	-0.653929	0.653929	0	0	0.457672	-1.42882	0.153057	0.557983	0.253379	PD-L1	POST-TREATMENT
LAMP3	3354.51	0.694655	0.694655	0	0	0.483234	1.43751	0.150572	0.557983	0.253379	PD-L1	POST-TREATMENT
TNFRSF17	302.033	-0.904892	0.904892	0	0	0.633678	-1.428	0.153292	0.557983	0.253379	PD-L1	POST-TREATMENT
CD86	929.437	-0.446346	0.446346	0	0	0.317416	-1.40619	0.159669	0.564266	0.248516	PD-L1	POST-TREATMENT
CX3CL1	1643.52	0.705622	0.705622	0	0	0.500683	1.40932	0.158741	0.564266	0.248516	PD-L1	POST-TREATMENT
PTPN11	8419.06	-0.50861	0.50861	0	0	0.3598	-1.41359	0.157482	0.564266	0.248516	PD-L1	POST-TREATMENT
CD37	6924.05	0.445039	0.445039	0	0	0.322206	1.38123	0.167209	0.567565	0.245984	PD-L1	POST-TREATMENT
CD38	1564.16	-0.672875	0.672875	0	0	0.482984	-1.39316	0.163571	0.567565	0.245984	PD-L1	POST-TREATMENT
IFIT1	1247	-0.720881	0.720881	0	0	0.523376	-1.37737	0.168398	0.567565	0.245984	PD-L1	POST-TREATMENT
ITGB7	1073.48	-0.586059	0.586059	0	0	0.425139	-1.37851	0.168045	0.567565	0.245984	PD-L1	POST-TREATMENT
ZBTB46	276.634	0.426536	0.426536	0	0	0.307639	1.38648	0.1656	0.567565	0.245984	PD-L1	POST-TREATMENT
FOXP3	199.949	-1.07223	1.07223	0	0	0.784935	-1.366	0.171938	0.574177	0.240954	PD-L1	POST-TREATMENT
CSF1R	1808.73	-0.307497	0.307497	0	0	0.226996	-1.35464	0.175533	0.576245	0.239393	PD-L1	POST-TREATMENT
HERC6	647.984	-0.537808	0.537808	0	0	0.397187	-1.35404	0.175723	0.576245	0.239393	PD-L1	POST-TREATMENT
GUSB	4535.55	-0.323259	0.323259	0	0	0.241909	-1.33628	0.181457	0.580969	0.235847	PD-L1	POST-TREATMENT
IL13	31.6693	-1.89801	1.89801	1	0	1.42198	-1.33477	0.181952	0.580969	0.235847	PD-L1	POST-TREATMENT
LEXM	25.0767	-2.56923	2.56923	1	1	1.92006	-1.3381	0.180864	0.580969	0.235847	PD-L1	POST-TREATMENT
GRAP2	969.44	0.435192	0.435192	0	0	0.329201	1.32196	0.186181	0.582942	0.234375	PD-L1	POST-TREATMENT
ITGB1	36382.6	-0.411986	0.411986	0	0	0.310381	-1.32736	0.184391	0.582942	0.234375	PD-L1	POST-TREATMENT
TNFRSF4	350.266	-0.757165	0.757165	0	0	0.574311	-1.31839	0.187374	0.582942	0.234375	PD-L1	POST-TREATMENT
PRDM1	4527.47	-0.400068	0.400068	0	0	0.306649	-1.30464	0.192015	0.592317	0.227446	PD-L1	POST-TREATMENT
TNFSF18	57.2703	-1.29763	1.29763	0	0	0.999924	-1.29772	0.194382	0.594581	0.225789	PD-L1	POST-TREATMENT
CD47	9847.64	0.329957	0.329957	0	0	0.255742	1.29019	0.196983	0.597516	0.223651	PD-L1	POST-TREATMENT
SLAMF7	9224.09	-0.536547	0.536547	0	0	0.423696	-1.26635	0.205388	0.617862	0.209108	PD-L1	POST-TREATMENT
HLA-DQB2	212.126	0.75962	0.75962	0	0	0.605517	1.2545	0.209661	0.625547	0.20374	PD-L1	POST-TREATMENT
PSMB9	2580.52	-0.34831	0.34831	0	0	0.279897	-1.24442	0.213345	0.631363	0.199721	PD-L1	POST-TREATMENT
ZEB1	2999.05	0.458444	0.458444	0	0	0.370008	1.23901	0.215342	0.632132	0.199192	PD-L1	POST-TREATMENT
PTGS2	2735.24	0.562334	0.562334	0	0	0.458127	1.22746	0.219648	0.639616	0.19408	PD-L1	POST-TREATMENT
CD63	36771.2	-0.326138	0.326138	0	0	0.269051	-1.21218	0.225444	0.642796	0.191927	PD-L1	POST-TREATMENT
FOXO1	7600.58	0.348622	0.348622	0	0	0.2901	1.20173	0.229468	0.642796	0.191927	PD-L1	POST-TREATMENT
IL7	200.716	0.667081	0.667081	0	0	0.559228	1.19286	0.232924	0.642796	0.191927	PD-L1	POST-TREATMENT
KIR2DL3	27.021	1.44585	1.44585	0	0	1.21255	1.19241	0.233102	0.642796	0.191927	PD-L1	POST-TREATMENT
TAGAP	2184.84	0.393455	0.393455	0	0	0.323696	1.21551	0.224172	0.642796	0.191927	PD-L1	POST-TREATMENT
TNF	147.267	0.605003	0.605003	0	0	0.50699	1.19332	0.232743	0.642796	0.191927	PD-L1	POST-TREATMENT
TNFSF4	87.2987	-0.547906	0.547906	0	0	0.457073	-1.19873	0.230634	0.642796	0.191927	PD-L1	POST-TREATMENT
NCR1	67.0563	0.825925	0.825925	0	0	0.703177	1.17456	0.24017	0.652403	0.185484	PD-L1	POST-TREATMENT
TNFSF9	124.71	-0.728798	0.728798	0	0	0.61846	-1.17841	0.238634	0.652403	0.185484	PD-L1	POST-TREATMENT
ITGAE	425.331	-0.522802	0.522802	0	0	0.450299	-1.16101	0.245637	0.662311	0.178938	PD-L1	POST-TREATMENT
ALOX15B	1585.32	0.661007	0.661007	0	0	0.573137	1.15331	0.248782	0.662449	0.178848	PD-L1	POST-TREATMENT
CCL4	9069.74	0.38492	0.38492	0	0	0.334834	1.14958	0.250316	0.662449	0.178848	PD-L1	POST-TREATMENT
HLA-DOA	2111.78	0.303692	0.303692	0	0	0.26464	1.14757	0.251148	0.662449	0.178848	PD-L1	POST-TREATMENT
CD8B	1284.56	-0.492029	0.492029	0	0	0.433641	-1.13465	0.256524	0.67176	0.172786	PD-L1	POST-TREATMENT
IRS1	4153.94	-0.48338	0.48338	0	0	0.444945	-1.08638	0.277311	0.710853	0.14822	PD-L1	POST-TREATMENT
NFKBIA	21399.8	0.366502	0.366502	0	0	0.33635	1.08965	0.275869	0.710853	0.14822	PD-L1	POST-TREATMENT
SLAMF8	1572.34	-0.307328	0.307328	0	0	0.281426	-1.09204	0.274817	0.710853	0.14822	PD-L1	POST-TREATMENT
CD33	1101.92	0.360364	0.360364	0	0	0.339066	1.06281	0.287866	0.73275	0.135044	PD-L1	POST-TREATMENT
PDCD1LG2	885.728	0.333594	0.333594	0	0	0.315623	1.05694	0.29054	0.73442	0.134056	PD-L1	POST-TREATMENT
CBLB	4726.74	0.377076	0.377076	0	0	0.390491	0.965646	0.334221	0.75218	0.123678	PD-L1	POST-TREATMENT
CCR4	643.047	0.362397	0.362397	0	0	0.357905	1.01255	0.311275	0.75218	0.123678	PD-L1	POST-TREATMENT
CCR5	2484.58	-0.30072	0.30072	0	0	0.298296	-1.00813	0.313393	0.75218	0.123678	PD-L1	POST-TREATMENT
CD226	1107.69	0.412835	0.412835	0	0	0.427864	0.964874	0.334608	0.75218	0.123678	PD-L1	POST-TREATMENT
CD276	929.824	-0.394982	0.394982	0	0	0.401079	-0.984799	0.324723	0.75218	0.123678	PD-L1	POST-TREATMENT
FCGR3A	4246.41	-0.32735	0.32735	0	0	0.326551	-1.00245	0.316127	0.75218	0.123678	PD-L1	POST-TREATMENT
GZMA	2215.91	-0.401008	0.401008	0	0	0.411785	-0.973828	0.330142	0.75218	0.123678	PD-L1	POST-TREATMENT
HLA-DQA1	8080.71	0.558357	0.558357	0	0	0.566669	0.985331	0.324462	0.75218	0.123678	PD-L1	POST-TREATMENT
ID2	13978.2	-0.434672	0.434672	0	0	0.419693	-1.03569	0.300346	0.75218	0.123678	PD-L1	POST-TREATMENT
IFI6	5885.67	-0.296897	0.296897	0	0	0.309122	-0.960452	0.336828	0.75218	0.123678	PD-L1	POST-TREATMENT
IL2RA	489.419	-0.5169	0.5169	0	0	0.507282	-1.01896	0.308221	0.75218	0.123678	PD-L1	POST-TREATMENT
ITK	1370.65	0.465952	0.465952	0	0	0.465461	1.00106	0.3168	0.75218	0.123678	PD-L1	POST-TREATMENT
JCHAIN	55089.3	0.523635	0.523635	0	0	0.50751	1.03177	0.302179	0.75218	0.123678	PD-L1	POST-TREATMENT
MAPK14	3577.3	-0.281211	0.281211	0	0	0.287169	-0.979251	0.327456	0.75218	0.123678	PD-L1	POST-TREATMENT
OAS1	1971.04	-0.320322	0.320322	0	0	0.322946	-0.991877	0.321258	0.75218	0.123678	PD-L1	POST-TREATMENT
PDCD1	492.889	-0.357879	0.357879	0	0	0.368023	-0.972438	0.330833	0.75218	0.123678	PD-L1	POST-TREATMENT
RB1	5308.95	-0.420427	0.420427	0	0	0.436928	-0.962234	0.335932	0.75218	0.123678	PD-L1	POST-TREATMENT
SAMHD1	7213.88	0.290298	0.290298	0	0	0.288548	1.00606	0.314384	0.75218	0.123678	PD-L1	POST-TREATMENT
SNAI1	590.8	-0.49587	0.49587	0	0	0.498322	-0.99508	0.319698	0.75218	0.123678	PD-L1	POST-TREATMENT
NOTCH3	7102.86	-0.324982	0.324982	0	0	0.341413	-0.951875	0.34116	0.75721	0.120784	PD-L1	POST-TREATMENT
SNAI2	1744.03	-0.410495	0.410495	0	0	0.439305	-0.93442	0.350087	0.772314	0.112206	PD-L1	POST-TREATMENT
ITGAX	2661.4	0.319395	0.319395	0	0	0.343822	0.928954	0.352913	0.773858	0.111339	PD-L1	POST-TREATMENT
HLA-G	24.3646	1.20188	1.20188	0	0	1.3024	0.922818	0.356102	0.776175	0.110041	PD-L1	POST-TREATMENT
CXCR4	22107.2	0.311669	0.311669	0	0	0.342665	0.909543	0.363063	0.786638	0.104225	PD-L1	POST-TREATMENT
FASLG	238.856	-0.591435	0.591435	0	0	0.661857	-0.8936	0.371536	0.800231	0.0967845	PD-L1	POST-TREATMENT
MMP9	4763.99	-0.486252	0.486252	0	0	0.549901	-0.884254	0.376559	0.802101	0.0957711	PD-L1	POST-TREATMENT
STAT3	17410.5	-0.223581	0.223581	0	0	0.25298	-0.883787	0.376811	0.802101	0.0957711	PD-L1	POST-TREATMENT
CEACAM8	32.2639	1.26228	1.26228	0	0	1.44084	0.876074	0.38099	0.806281	0.0935137	PD-L1	POST-TREATMENT
GZMB	1845.61	-0.323064	0.323064	0	0	0.372715	-0.866786	0.386059	0.812286	0.0902908	PD-L1	POST-TREATMENT
LILRB1	373.618	0.428614	0.428614	0	0	0.49945	0.858173	0.390797	0.817529	0.0874967	PD-L1	POST-TREATMENT
HLA-DRB1	136012	0.42419	0.42419	0	0	0.502246	0.844585	0.398342	0.828552	0.08168	PD-L1	POST-TREATMENT
ABCF1	6441.37	-0.303344	0.303344	0	0	0.363419	-0.834695	0.40389	0.835317	0.0781487	PD-L1	POST-TREATMENT
CCR6	305.136	0.418839	0.418839	0	0	0.513909	0.815005	0.415069	0.836614	0.0774751	PD-L1	POST-TREATMENT
CD79B	575.724	-0.341055	0.341055	0	0	0.412972	-0.825854	0.408887	0.836614	0.0774751	PD-L1	POST-TREATMENT
EIF2AK2	5223.02	-0.187499	0.187499	0	0	0.228343	-0.821129	0.411573	0.836614	0.0774751	PD-L1	POST-TREATMENT
IDO1	1110.12	-0.400166	0.400166	0	0	0.488334	-0.819453	0.412528	0.836614	0.0774751	PD-L1	POST-TREATMENT
RORC	1195.56	-0.491656	0.491656	0	0	0.604471	-0.813366	0.416008	0.836614	0.0774751	PD-L1	POST-TREATMENT
CD247	1029.43	0.30407	0.30407	0	0	0.384125	0.791591	0.428599	0.849938	0.0706127	PD-L1	POST-TREATMENT
FYB	6158.68	0.208969	0.208969	0	0	0.264581	0.789809	0.429639	0.849938	0.0706127	PD-L1	POST-TREATMENT
MPO	80.6494	-0.683419	0.683419	0	0	0.863307	-0.79163	0.428577	0.849938	0.0706127	PD-L1	POST-TREATMENT
CD1D	111.415	0.455162	0.455162	0	0	0.608941	0.747465	0.454783	0.859926	0.0655389	PD-L1	POST-TREATMENT
CD2	4105.75	-0.234353	0.234353	0	0	0.312873	-0.749034	0.453837	0.859926	0.0655389	PD-L1	POST-TREATMENT
CLEC4C	77.4463	-0.904624	0.904624	0	0	1.20285	-0.752066	0.452011	0.859926	0.0655389	PD-L1	POST-TREATMENT
CXCR6	589.963	-0.41837	0.41837	0	0	0.553194	-0.756282	0.44948	0.859926	0.0655389	PD-L1	POST-TREATMENT
IFNB1	800.561	-0.503082	0.503082	0	0	0.652703	-0.770768	0.440844	0.859926	0.0655389	PD-L1	POST-TREATMENT
IKZF4	119.385	-0.659163	0.659163	0	0	0.88415	-0.745533	0.45595	0.859926	0.0655389	PD-L1	POST-TREATMENT
KLRK1	3581.53	0.269383	0.269383	0	0	0.360292	0.747679	0.454654	0.859926	0.0655389	PD-L1	POST-TREATMENT
PECAM1	5511.99	-0.397875	0.397875	0	0	0.51474	-0.772963	0.439545	0.859926	0.0655389	PD-L1	POST-TREATMENT
TIGIT	528.976	-0.433532	0.433532	0	0	0.579764	-0.747773	0.454597	0.859926	0.0655389	PD-L1	POST-TREATMENT
CXCL1	8016.16	-0.44027	0.44027	0	0	0.599886	-0.733923	0.462996	0.864259	0.0633562	PD-L1	POST-TREATMENT
IKZF2	254.002	-0.317407	0.317407	0	0	0.430672	-0.737005	0.461119	0.864259	0.0633562	PD-L1	POST-TREATMENT
CCL21	7630.37	0.262491	0.262491	0	0	0.368044	0.713206	0.475718	0.878992	0.0560152	PD-L1	POST-TREATMENT
IFIT2	1797.37	-0.240693	0.240693	0	0	0.336605	-0.71506	0.474572	0.878992	0.0560152	PD-L1	POST-TREATMENT
CTLA4	378.849	-0.374027	0.374027	0	0	0.52986	-0.705898	0.480251	0.882886	0.0540952	PD-L1	POST-TREATMENT
PTPN6	4889.31	-0.150638	0.150638	0	0	0.215789	-0.698083	0.485125	0.887365	0.0518979	PD-L1	POST-TREATMENT
TNFAIP8	1238.62	-0.194633	0.194633	0	0	0.2824	-0.689208	0.490692	0.89306	0.0491196	PD-L1	POST-TREATMENT
GNLY	2694.59	0.382708	0.382708	0	0	0.558547	0.685184	0.493228	0.893209	0.049047	PD-L1	POST-TREATMENT
CXCL11	401.348	-0.387719	0.387719	0	0	0.574374	-0.675029	0.499657	0.895937	0.0477224	PD-L1	POST-TREATMENT
HLA-A	21235.5	0.938949	0.938949	0	0	1.38557	0.677661	0.497987	0.895937	0.0477224	PD-L1	POST-TREATMENT
TDO2	551.236	-0.315402	0.315402	0	0	0.479731	-0.657456	0.510888	0.911584	0.0402032	PD-L1	POST-TREATMENT
ADORA2A	681.015	0.211815	0.211815	0	0	0.363016	0.583486	0.559566	0.914331	0.0388964	PD-L1	POST-TREATMENT
CCR2	493.451	-0.25297	0.25297	0	0	0.446293	-0.566826	0.570832	0.914331	0.0388964	PD-L1	POST-TREATMENT
CD27	991.311	-0.27668	0.27668	0	0	0.456932	-0.605517	0.544836	0.914331	0.0388964	PD-L1	POST-TREATMENT
CD40LG	270.354	0.37559	0.37559	0	0	0.614098	0.611613	0.540794	0.914331	0.0388964	PD-L1	POST-TREATMENT
CD48	1492.67	0.187711	0.187711	0	0	0.323495	0.580261	0.561739	0.914331	0.0388964	PD-L1	POST-TREATMENT
CD68	27848.4	0.160623	0.160623	0	0	0.277294	0.57925	0.56242	0.914331	0.0388964	PD-L1	POST-TREATMENT
CD69	2579.03	0.191122	0.191122	0	0	0.297384	0.642678	0.520433	0.914331	0.0388964	PD-L1	POST-TREATMENT
CD70	71.8358	-0.438282	0.438282	0	0	0.777099	-0.563998	0.572756	0.914331	0.0388964	PD-L1	POST-TREATMENT
EOMES	464.101	0.27362	0.27362	0	0	0.462937	0.591053	0.554485	0.914331	0.0388964	PD-L1	POST-TREATMENT
GPR18	174.207	-0.43883	0.43883	0	0	0.698242	-0.628478	0.529691	0.914331	0.0388964	PD-L1	POST-TREATMENT
HGF	852.588	-0.216555	0.216555	0	0	0.339091	-0.638635	0.52306	0.914331	0.0388964	PD-L1	POST-TREATMENT
IFI44L	1558.23	-0.245826	0.245826	0	0	0.434656	-0.565565	0.571689	0.914331	0.0388964	PD-L1	POST-TREATMENT
IFNA17	1551.84	-0.418685	0.418685	0	0	0.674282	-0.620935	0.534643	0.914331	0.0388964	PD-L1	POST-TREATMENT
IL10	188.451	-0.394101	0.394101	0	0	0.665344	-0.592327	0.553632	0.914331	0.0388964	PD-L1	POST-TREATMENT
IL10RA	5074.96	0.14287	0.14287	0	0	0.228668	0.624794	0.532106	0.914331	0.0388964	PD-L1	POST-TREATMENT
IL3RA	1031.76	0.197164	0.197164	0	0	0.340627	0.578826	0.562707	0.914331	0.0388964	PD-L1	POST-TREATMENT
ITGAM	2489.9	-0.190744	0.190744	0	0	0.3316	-0.575223	0.565141	0.914331	0.0388964	PD-L1	POST-TREATMENT
LST1	990.747	0.212671	0.212671	0	0	0.365066	0.582556	0.560192	0.914331	0.0388964	PD-L1	POST-TREATMENT
PVR	3406.31	0.250446	0.250446	0	0	0.41616	0.601801	0.547307	0.914331	0.0388964	PD-L1	POST-TREATMENT
STAT5A	1716.14	-0.178213	0.178213	0	0	0.316153	-0.563692	0.572964	0.914331	0.0388964	PD-L1	POST-TREATMENT
TLR9	373.078	0.309727	0.309727	0	0	0.506559	0.611434	0.540912	0.914331	0.0388964	PD-L1	POST-TREATMENT
TNFSF13B	3535.83	-0.205638	0.205638	0	0	0.344521	-0.59688	0.550588	0.914331	0.0388964	PD-L1	POST-TREATMENT
TRIM29	442.263	0.472728	0.472728	0	0	0.772503	0.611943	0.540576	0.914331	0.0388964	PD-L1	POST-TREATMENT
TYROBP	82789.6	0.18072	0.18072	0	0	0.322499	0.560373	0.575225	0.914331	0.0388964	PD-L1	POST-TREATMENT
VEGFA	16897.3	-0.25215	0.25215	0	0	0.432105	-0.583539	0.559531	0.914331	0.0388964	PD-L1	POST-TREATMENT
EGR3	3806.79	-0.300169	0.300169	0	0	0.542618	-0.553186	0.580136	0.916781	0.0377344	PD-L1	POST-TREATMENT
GATA3	553.923	0.161339	0.161339	0	0	0.296378	0.544368	0.586188	0.916781	0.0377344	PD-L1	POST-TREATMENT
ID3	1622.64	-0.244351	0.244351	0	0	0.451501	-0.541197	0.588372	0.916781	0.0377344	PD-L1	POST-TREATMENT
IFIH1	1318.05	-0.183193	0.183193	0	0	0.340334	-0.538274	0.590388	0.916781	0.0377344	PD-L1	POST-TREATMENT
TLR8	458.423	-0.309675	0.309675	0	0	0.571571	-0.541795	0.587959	0.916781	0.0377344	PD-L1	POST-TREATMENT
TNFSF10	3511.18	-0.203816	0.203816	0	0	0.38017	-0.536117	0.591878	0.916781	0.0377344	PD-L1	POST-TREATMENT
ENTPD1	2589.53	0.135219	0.135219	0	0	0.261325	0.517434	0.604853	0.925069	0.0338258	PD-L1	POST-TREATMENT
FCGR3B	769.199	-0.356471	0.356471	0	0	0.687328	-0.518633	0.604017	0.925069	0.0338258	PD-L1	POST-TREATMENT
IL2RG	3127.15	0.131336	0.131336	0	0	0.252918	0.519281	0.603565	0.925069	0.0338258	PD-L1	POST-TREATMENT
CD40	1006.9	-0.180427	0.180427	0	0	0.355738	-0.50719	0.612021	0.928232	0.0323434	PD-L1	POST-TREATMENT
LY9	160.834	0.440815	0.440815	0	0	0.864514	0.5099	0.610122	0.928232	0.0323434	PD-L1	POST-TREATMENT
B3GAT1	81.3703	-0.3686	0.3686	0	0	0.827397	-0.445493	0.655964	0.940042	0.0268526	PD-L1	POST-TREATMENT
BCL6	9336.83	0.141659	0.141659	0	0	0.302263	0.46866	0.639313	0.940042	0.0268526	PD-L1	POST-TREATMENT
CCL5	8259.78	0.164864	0.164864	0	0	0.341995	0.482064	0.62976	0.940042	0.0268526	PD-L1	POST-TREATMENT
CCR1	1118	-0.198604	0.198604	0	0	0.439857	-0.451518	0.651616	0.940042	0.0268526	PD-L1	POST-TREATMENT
CD28	781.18	-0.194354	0.194354	0	0	0.42198	-0.460576	0.645103	0.940042	0.0268526	PD-L1	POST-TREATMENT
CORO1A	3569.64	-0.14836	0.14836	0	0	0.327717	-0.452709	0.650758	0.940042	0.0268526	PD-L1	POST-TREATMENT
IL18	1901.42	0.106777	0.106777	0	0	0.217315	0.491346	0.623182	0.940042	0.0268526	PD-L1	POST-TREATMENT
IL1A	96.805	0.511097	0.511097	0	0	1.06155	0.481462	0.630188	0.940042	0.0268526	PD-L1	POST-TREATMENT
LRG1	517.067	-0.215716	0.215716	0	0	0.447183	-0.482389	0.629529	0.940042	0.0268526	PD-L1	POST-TREATMENT
LYZ	78856	-0.174761	0.174761	0	0	0.368592	-0.474132	0.635406	0.940042	0.0268526	PD-L1	POST-TREATMENT
MMP2	50200.2	-0.15223	0.15223	0	0	0.337152	-0.451519	0.651616	0.940042	0.0268526	PD-L1	POST-TREATMENT
MS4A1	682.182	0.248792	0.248792	0	0	0.55721	0.446495	0.65524	0.940042	0.0268526	PD-L1	POST-TREATMENT
NT5E	844.642	-0.135713	0.135713	0	0	0.29767	-0.455918	0.648449	0.940042	0.0268526	PD-L1	POST-TREATMENT
SKAP2	2677.28	-0.157344	0.157344	0	0	0.343743	-0.457736	0.647142	0.940042	0.0268526	PD-L1	POST-TREATMENT
C1QA	22078.5	0.0748493	0.0748493	0	0	0.246971	0.303069	0.761837	0.948454	0.0229837	PD-L1	POST-TREATMENT
C1QB	48947.1	-0.0962777	0.0962777	0	0	0.327339	-0.294122	0.768665	0.948454	0.0229837	PD-L1	POST-TREATMENT
CCL2	21594.5	0.249854	0.249854	0	0	0.686866	0.36376	0.716038	0.948454	0.0229837	PD-L1	POST-TREATMENT
CD3D	2929.68	-0.107325	0.107325	0	0	0.354071	-0.303117	0.761801	0.948454	0.0229837	PD-L1	POST-TREATMENT
CD53	544.4	0.315088	0.315088	0	0	0.793625	0.397024	0.69135	0.948454	0.0229837	PD-L1	POST-TREATMENT
CD74	16138.2	0.108031	0.108031	0	0	0.311706	0.346579	0.728908	0.948454	0.0229837	PD-L1	POST-TREATMENT
CD79A	7581.61	0.167858	0.167858	0	0	0.512441	0.327565	0.743241	0.948454	0.0229837	PD-L1	POST-TREATMENT
CD83	3105.12	0.135885	0.135885	0	0	0.377797	0.359677	0.719089	0.948454	0.0229837	PD-L1	POST-TREATMENT
CIITA	9129.53	0.123727	0.123727	0	0	0.305596	0.404872	0.685571	0.948454	0.0229837	PD-L1	POST-TREATMENT
CTSS	11312.3	-0.0728421	0.0728421	0	0	0.246437	-0.295581	0.76755	0.948454	0.0229837	PD-L1	POST-TREATMENT
CXCR2	1018.12	0.25451	0.25451	0	0	0.628401	0.405012	0.685469	0.948454	0.0229837	PD-L1	POST-TREATMENT
CXCR5	252.342	-0.255458	0.255458	0	0	0.807342	-0.316418	0.751685	0.948454	0.0229837	PD-L1	POST-TREATMENT
CYBB	9099.03	0.0899052	0.0899052	0	0	0.249915	0.359743	0.719039	0.948454	0.0229837	PD-L1	POST-TREATMENT
EBI3	284.07	-0.194901	0.194901	0	0	0.528529	-0.36876	0.712306	0.948454	0.0229837	PD-L1	POST-TREATMENT
EGR2	3704.02	-0.120951	0.120951	0	0	0.366278	-0.330217	0.741236	0.948454	0.0229837	PD-L1	POST-TREATMENT
FCER1G	14842.4	0.0958048	0.0958048	0	0	0.257173	0.372531	0.709498	0.948454	0.0229837	PD-L1	POST-TREATMENT
FCGR1A	1013.61	-0.206986	0.206986	0	0	0.494749	-0.418366	0.67568	0.948454	0.0229837	PD-L1	POST-TREATMENT
FCGR2B	480.573	-0.231026	0.231026	0	0	0.534125	-0.432532	0.665355	0.948454	0.0229837	PD-L1	POST-TREATMENT
HLA-B	13169.1	0.487131	0.487131	0	0	1.34884	0.361148	0.717989	0.948454	0.0229837	PD-L1	POST-TREATMENT
HLA-C	15291.3	-0.208429	0.208429	0	0	0.633407	-0.329061	0.74211	0.948454	0.0229837	PD-L1	POST-TREATMENT
HLA-DMB	801.47	0.418068	0.418068	0	0	1.09544	0.381645	0.702725	0.948454	0.0229837	PD-L1	POST-TREATMENT
HLA-DPB1	37137.2	-0.0925271	0.0925271	0	0	0.258057	-0.358552	0.71993	0.948454	0.0229837	PD-L1	POST-TREATMENT
IFITM1	16868.7	-0.0960686	0.0960686	0	0	0.244459	-0.392985	0.69433	0.948454	0.0229837	PD-L1	POST-TREATMENT
IFITM2	14119.6	0.0851854	0.0851854	0	0	0.285113	0.298777	0.76511	0.948454	0.0229837	PD-L1	POST-TREATMENT
IGF1R	11366.3	0.0942875	0.0942875	0	0	0.2915	0.323456	0.74635	0.948454	0.0229837	PD-L1	POST-TREATMENT
IKZF1	17414.1	0.132417	0.132417	0	0	0.37497	0.353141	0.723982	0.948454	0.0229837	PD-L1	POST-TREATMENT
IKZF3	2362.37	-0.106706	0.106706	0	0	0.345211	-0.309103	0.757243	0.948454	0.0229837	PD-L1	POST-TREATMENT
IL12A	161.768	-0.216727	0.216727	0	0	0.723817	-0.299422	0.764618	0.948454	0.0229837	PD-L1	POST-TREATMENT
IL23A	22.3907	0.291538	0.291538	0	0	0.946747	0.307936	0.758131	0.948454	0.0229837	PD-L1	POST-TREATMENT
IRF1	4184.21	0.0897509	0.0897509	0	0	0.273265	0.32844	0.742579	0.948454	0.0229837	PD-L1	POST-TREATMENT
IRF9	6398.91	-0.0606102	0.0606102	0	0	0.172259	-0.351854	0.724948	0.948454	0.0229837	PD-L1	POST-TREATMENT
LAPTM5	19941.4	-0.0890765	0.0890765	0	0	0.285137	-0.312399	0.754737	0.948454	0.0229837	PD-L1	POST-TREATMENT
MADCAM1	84.346	-0.395184	0.395184	0	0	0.990755	-0.398872	0.689988	0.948454	0.0229837	PD-L1	POST-TREATMENT
NKG7	5922.04	-0.0998162	0.0998162	0	0	0.299586	-0.33318	0.738998	0.948454	0.0229837	PD-L1	POST-TREATMENT
PIK3CD	1600.53	0.128362	0.128362	0	0	0.378422	0.339202	0.734457	0.948454	0.0229837	PD-L1	POST-TREATMENT
PTEN	13664.3	-0.170503	0.170503	0	0	0.42456	-0.4016	0.687978	0.948454	0.0229837	PD-L1	POST-TREATMENT
PTPRCAP	27.2854	-0.329452	0.329452	0	0	1.03486	-0.318354	0.750217	0.948454	0.0229837	PD-L1	POST-TREATMENT
SELL	442.276	-0.136034	0.136034	0	0	0.332696	-0.408885	0.682624	0.948454	0.0229837	PD-L1	POST-TREATMENT
SH2D1B	115.836	0.223602	0.223602	0	0	0.722718	0.30939	0.757025	0.948454	0.0229837	PD-L1	POST-TREATMENT
TCF7	1219.82	0.102515	0.102515	0	0	0.348036	0.294553	0.768335	0.948454	0.0229837	PD-L1	POST-TREATMENT
TLR3	581.027	0.241494	0.241494	0	0	0.585091	0.412747	0.679792	0.948454	0.0229837	PD-L1	POST-TREATMENT
IL1B	1092.28	0.151179	0.151179	0	0	0.529573	0.285474	0.775281	0.950176	0.0221958	PD-L1	POST-TREATMENT
TNFSF14	117.305	0.422648	0.422648	0	0	1.46461	0.288575	0.772907	0.950176	0.0221958	PD-L1	POST-TREATMENT
IRF4	1256.18	-0.170464	0.170464	0	0	0.611579	-0.278727	0.780454	0.953307	0.0207673	PD-L1	POST-TREATMENT
HLA-F-AS1	25.7079	-0.249634	0.249634	0	0	0.911342	-0.273919	0.784147	0.954613	0.0201726	PD-L1	POST-TREATMENT
CD3G	3241.99	-0.089592	0.089592	0	0	0.338177	-0.264926	0.791066	0.959827	0.017807	PD-L1	POST-TREATMENT
AKT1	4370.51	0.0620013	0.0620013	0	0	0.245681	0.252365	0.800759	0.960116	0.0176764	PD-L1	POST-TREATMENT
CD4	4234.96	0.0619613	0.0619613	0	0	0.238276	0.26004	0.794833	0.960116	0.0176764	PD-L1	POST-TREATMENT
IGSF6	1634.17	0.0915135	0.0915135	0	0	0.364672	0.250947	0.801855	0.960116	0.0176764	PD-L1	POST-TREATMENT
PTPN7	1887.52	-0.113822	0.113822	0	0	0.453095	-0.251211	0.801651	0.960116	0.0176764	PD-L1	POST-TREATMENT
ARG1	22.8575	0.368196	0.368196	0	0	1.92893	0.190881	0.848619	0.964925	0.0155064	PD-L1	POST-TREATMENT
BATF	2755.45	-0.06424	0.06424	0	0	0.310692	-0.206764	0.836194	0.964925	0.0155064	PD-L1	POST-TREATMENT
BCL2	1344.77	-0.060353	0.060353	0	0	0.308468	-0.195654	0.844881	0.964925	0.0155064	PD-L1	POST-TREATMENT
CCL18	9640.6	0.0889302	0.0889302	0	0	0.418565	0.212465	0.831745	0.964925	0.0155064	PD-L1	POST-TREATMENT
CD1C	1621.22	0.0942123	0.0942123	0	0	0.431168	0.218505	0.827036	0.964925	0.0155064	PD-L1	POST-TREATMENT
CD244	242.163	-0.121363	0.121363	0	0	0.629335	-0.192843	0.847082	0.964925	0.0155064	PD-L1	POST-TREATMENT
CD274	522.224	0.0837974	0.0837974	0	0	0.454081	0.184543	0.853587	0.964925	0.0155064	PD-L1	POST-TREATMENT
FCRLA	411.796	-0.166352	0.166352	0	0	0.801605	-0.207523	0.835601	0.964925	0.0155064	PD-L1	POST-TREATMENT
HAVCR2	2979.79	-0.047581	0.047581	0	0	0.234202	-0.203162	0.839008	0.964925	0.0155064	PD-L1	POST-TREATMENT
HLA-DQA2	56.0986	0.295289	0.295289	0	0	1.31075	0.225282	0.82176	0.964925	0.0155064	PD-L1	POST-TREATMENT
HLA-F	690.929	-0.0560639	0.0560639	0	0	0.24572	-0.228162	0.81952	0.964925	0.0155064	PD-L1	POST-TREATMENT
ICOSLG	1520.91	0.0593632	0.0593632	0	0	0.313867	0.189135	0.849987	0.964925	0.0155064	PD-L1	POST-TREATMENT
ITGB2	5356.33	0.0658331	0.0658331	0	0	0.313636	0.209903	0.833743	0.964925	0.0155064	PD-L1	POST-TREATMENT
KLRG1	789.044	0.12828	0.12828	0	0	0.542865	0.236301	0.813199	0.964925	0.0155064	PD-L1	POST-TREATMENT
LILRB2	846.45	-0.0771877	0.0771877	0	0	0.322364	-0.239443	0.810762	0.964925	0.0155064	PD-L1	POST-TREATMENT
POU2AF1	3370.63	0.0962734	0.0962734	0	0	0.465355	0.206882	0.836102	0.964925	0.0155064	PD-L1	POST-TREATMENT
SIT1	498.315	0.101251	0.101251	0	0	0.525893	0.192532	0.847325	0.964925	0.0155064	PD-L1	POST-TREATMENT
TGFB1	12807.3	0.0470254	0.0470254	0	0	0.254257	0.184952	0.853267	0.964925	0.0155064	PD-L1	POST-TREATMENT
CCR7	942.949	0.0661101	0.0661101	0	0	0.364954	0.181146	0.856253	0.964941	0.0154992	PD-L1	POST-TREATMENT
CCL3	1255.94	0.0756017	0.0756017	0	0	0.468672	0.16131	0.871849	0.96754	0.0143312	PD-L1	POST-TREATMENT
IL6	2043.39	0.116225	0.116225	0	0	0.668584	0.173838	0.861993	0.96754	0.0143312	PD-L1	POST-TREATMENT
ISG20	2436.08	0.0481606	0.0481606	0	0	0.294809	0.163362	0.870233	0.96754	0.0143312	PD-L1	POST-TREATMENT
PIK3CA	1999.29	-0.0405065	0.0405065	0	0	0.250485	-0.161713	0.871532	0.96754	0.0143312	PD-L1	POST-TREATMENT
TLR7	448.905	0.0974916	0.0974916	0	0	0.589722	0.165318	0.868694	0.96754	0.0143312	PD-L1	POST-TREATMENT
ITGAL	2403.47	-0.0682393	0.0682393	0	0	0.443654	-0.153812	0.877758	0.970855	0.0128458	PD-L1	POST-TREATMENT
JAML	648.399	-0.0881392	0.0881392	0	0	0.584659	-0.150753	0.88017	0.970855	0.0128458	PD-L1	POST-TREATMENT
CD6	923.422	-0.0442266	0.0442266	0	0	0.310513	-0.142431	0.88674	0.975146	0.0109304	PD-L1	POST-TREATMENT
AIF1	7058.15	-0.0411343	0.0411343	0	0	0.298168	-0.137957	0.890275	0.976084	0.0105127	PD-L1	POST-TREATMENT
KLRF1	123.458	0.10164	0.10164	0	0	0.840169	0.120976	0.90371	0.981942	0.00791429	PD-L1	POST-TREATMENT
NCF1	4666.32	0.045791	0.045791	0	0	0.367935	0.124454	0.900956	0.981942	0.00791429	PD-L1	POST-TREATMENT
NRP1	9685.93	-0.0334966	0.0334966	0	0	0.269558	-0.124265	0.901105	0.981942	0.00791429	PD-L1	POST-TREATMENT
CD160	54.774	0.117697	0.117697	0	0	1.03245	0.113998	0.90924	0.982087	0.00785016	PD-L1	POST-TREATMENT
KLRB1	2149.56	-0.0436493	0.0436493	0	0	0.377675	-0.115574	0.90799	0.982087	0.00785016	PD-L1	POST-TREATMENT
CD163	7435.64	-0.0312427	0.0312427	0	0	0.316034	-0.0988586	0.921251	0.983789	0.00709806	PD-L1	POST-TREATMENT
FUT4	2921.71	-0.0436044	0.0436044	0	0	0.421347	-0.103488	0.917576	0.983789	0.00709806	PD-L1	POST-TREATMENT
NCAM1	477.605	-0.0589695	0.0589695	0	0	0.599374	-0.0983852	0.921626	0.983789	0.00709806	PD-L1	POST-TREATMENT
TNFRSF14	2938.79	0.0249339	0.0249339	0	0	0.232347	0.107313	0.914541	0.983789	0.00709806	PD-L1	POST-TREATMENT
CRTAM	372.765	-0.0517129	0.0517129	0	0	0.586676	-0.0881457	0.929761	0.983817	0.0070858	PD-L1	POST-TREATMENT
SH2D1A	523.738	-0.0363903	0.0363903	0	0	0.39077	-0.0931247	0.925804	0.983817	0.0070858	PD-L1	POST-TREATMENT
SRGN	22086.8	-0.0262637	0.0262637	0	0	0.291194	-0.0901932	0.928134	0.983817	0.0070858	PD-L1	POST-TREATMENT
CX3CR1	167.275	-0.0367624	0.0367624	0	0	0.469881	-0.0782377	0.937639	0.988243	0.00513638	PD-L1	POST-TREATMENT
SDHA	4224.39	-0.0145749	0.0145749	0	0	0.191631	-0.0760572	0.939374	0.988243	0.00513638	PD-L1	POST-TREATMENT
STAT6	9185.72	-0.0208592	0.0208592	0	0	0.302991	-0.0688443	0.945114	0.991416	0.0037441	PD-L1	POST-TREATMENT
HLA-DPA1	90978.3	0.0317829	0.0317829	0	0	0.504563	0.062991	0.949774	0.993441	0.00285775	PD-L1	POST-TREATMENT
CSF2RB	6284.34	-0.0128914	0.0128914	0	0	0.245995	-0.0524052	0.958206	0.993861	0.00267454	PD-L1	POST-TREATMENT
EGFR	7850.19	-0.0242353	0.0242353	0	0	0.464235	-0.0522047	0.958366	0.993861	0.00267454	PD-L1	POST-TREATMENT
HLA-DRA	106895	-0.0136436	0.0136436	0	0	0.247684	-0.0550847	0.956071	0.993861	0.00267454	PD-L1	POST-TREATMENT
CD8A	3671.62	0.0127928	0.0127928	0	0	0.337904	0.0378592	0.9698	0.998334	0.000724249	PD-L1	POST-TREATMENT
KREMEN1	880.298	-0.0138783	0.0138783	0	0	0.341586	-0.0406289	0.967592	0.998334	0.000724249	PD-L1	POST-TREATMENT
NCR3	180.824	0.0272113	0.0272113	0	0	0.746113	0.0364708	0.970907	0.998334	0.000724249	PD-L1	POST-TREATMENT
GZMK	780.596	-0.0172176	0.0172176	0	0	0.522953	-0.0329238	0.973735	0.998422	0.000686039	PD-L1	POST-TREATMENT
BTLA	612.261	-0.000120131	0.000120131	0	0	0.488599	-0.000245869	0.999804	0.999804	8.5206e-05	PD-L1	POST-TREATMENT
CD3E	6032.18	0.00404812	0.00404812	0	0	0.245217	0.0165083	0.986829	0.999804	8.5206e-05	PD-L1	POST-TREATMENT
CD80	1898.61	-0.00155369	0.00155369	0	0	0.490996	-0.00316436	0.997475	0.999804	8.5206e-05	PD-L1	POST-TREATMENT
HLA-DMA	13006.5	0.00306947	0.00306947	0	0	0.233262	0.0131589	0.989501	0.999804	8.5206e-05	PD-L1	POST-TREATMENT
HLA-DOB	1791.19	0.00611355	0.00611355	0	0	0.495587	0.012336	0.990158	0.999804	8.5206e-05	PD-L1	POST-TREATMENT
ICOS	170.624	-0.0161804	0.0161804	0	0	0.673495	-0.0240245	0.980833	0.999804	8.5206e-05	PD-L1	POST-TREATMENT
LRP1	14503.2	0.00116685	0.00116685	0	0	0.236328	0.00493739	0.996061	0.999804	8.5206e-05	PD-L1	POST-TREATMENT
MYC	6739.25	0.00298927	0.00298927	0	0	0.4476	0.00667842	0.994671	0.999804	8.5206e-05	PD-L1	POST-TREATMENT
NTN3	64.3997	-0.00374431	0.00374431	0	0	0.860782	-0.0043499	0.996529	0.999804	8.5206e-05	PD-L1	POST-TREATMENT
BAGE	0	0	0	0	0	0	0	1	NA	#VALUE!	PD-L1	POST-TREATMENT
CMKLR1	7.50119	-0.666584	0.666584	0	0	2.03637	-0.327339	0.743411	NA	#VALUE!	PD-L1	POST-TREATMENT
CTAG1B	0	0	0	0	0	0	0	1	NA	#VALUE!	PD-L1	POST-TREATMENT
CTAG2	0.79633	-0.278538	0.278538	0	0	3.76263	-0.0740274	0.940989	NA	#VALUE!	PD-L1	POST-TREATMENT
CXCR3	22.1215	0.0748082	0.0748082	0	0	0.959605	0.0779573	0.937862	NA	#VALUE!	PD-L1	POST-TREATMENT
GAGE1	0.297909	0.0844275	0.0844275	0	0	3.79212	0.0222639	0.982237	NA	#VALUE!	PD-L1	POST-TREATMENT
GAGE10	10.1348	5.07764	5.07764	1	1	2.45517	2.06815	0.0386263	NA	#VALUE!	PD-L1	POST-TREATMENT
GAGE12J	0.0711278	0	0	0	0	3.79212	0	1	NA	#VALUE!	PD-L1	POST-TREATMENT
GAGE13	0	NA	#VALUE!	#VALUE!	#VALUE!	NA	NA	NA	NA	#VALUE!	PD-L1	POST-TREATMENT
GAGE2C	0	NA	#VALUE!	#VALUE!	#VALUE!	NA	NA	NA	NA	#VALUE!	PD-L1	POST-TREATMENT
IDO2	6.39083	-0.170131	0.170131	0	0	2.03465	-0.0836171	0.933361	NA	#VALUE!	PD-L1	POST-TREATMENT
IL12B	12.4145	-0.791976	0.791976	0	0	2.56275	-0.309034	0.757296	NA	#VALUE!	PD-L1	POST-TREATMENT
IL17A	5.3131	-6.28014	6.28014	1	1	3.74409	-1.67735	0.0934742	NA	#VALUE!	PD-L1	POST-TREATMENT
IL17F	0	NA	#VALUE!	#VALUE!	#VALUE!	NA	NA	NA	NA	#VALUE!	PD-L1	POST-TREATMENT
IL2	10.0127	0.111562	0.111562	0	0	1.36641	0.0816459	0.934928	NA	#VALUE!	PD-L1	POST-TREATMENT
IL21	11.9917	-2.83115	2.83115	1	1	2.22696	-1.27131	0.20362	NA	#VALUE!	PD-L1	POST-TREATMENT
IL22	1.62854	4.05695	4.05695	1	1	3.75008	1.08183	0.279328	NA	#VALUE!	PD-L1	POST-TREATMENT
IL4	4.19919	-2.01945	2.01945	1	1	3.7213	-0.542674	0.587355	NA	#VALUE!	PD-L1	POST-TREATMENT
KIR2DL1	0.16364	0.929068	0.929068	0	0	3.7896	0.245163	0.80633	NA	#VALUE!	PD-L1	POST-TREATMENT
KIR2DL2	0.980384	1.25657	1.25657	0	0	3.78029	0.3324	0.739587	NA	#VALUE!	PD-L1	POST-TREATMENT
LCK	13.4503	-1.03581	1.03581	0	0	1.3777	-0.75184	0.452147	NA	#VALUE!	PD-L1	POST-TREATMENT
MAGEA1	0	0	0	0	0	0	0	1	NA	#VALUE!	PD-L1	POST-TREATMENT
MAGEA10	0.27714	0.634649	0.634649	0	0	3.79127	0.167397	0.867057	NA	#VALUE!	PD-L1	POST-TREATMENT
MAGEA12	6.63562	-6.71379	6.71379	1	1	3.74352	-1.79344	0.0729019	NA	#VALUE!	PD-L1	POST-TREATMENT
MAGEA3	10.2619	-4.95139	4.95139	1	1	3.71688	-1.33214	0.182815	NA	#VALUE!	PD-L1	POST-TREATMENT
MAGEA4	0.155059	1.443	1.443	0	0	3.78147	0.381598	0.70276	NA	#VALUE!	PD-L1	POST-TREATMENT
MAGEC2	1.31663	-0.177879	0.177879	0	0	3.79212	-0.0469075	0.962587	NA	#VALUE!	PD-L1	POST-TREATMENT
MLANA	0	NA	#VALUE!	#VALUE!	#VALUE!	NA	NA	NA	NA	#VALUE!	PD-L1	POST-TREATMENT
NOS2	9.00074	-0.0261276	0.0261276	0	0	2.58783	-0.0100963	0.991944	NA	#VALUE!	PD-L1	POST-TREATMENT
SSX2	0	NA	#VALUE!	#VALUE!	#VALUE!	NA	NA	NA	NA	#VALUE!	PD-L1	POST-TREATMENT
VTCN1	12.1165	-2.59004	2.59004	1	1	1.56082	-1.65941	0.0970326	NA	#VALUE!	PD-L1	POST-TREATMENT
MAGEA1	57.9015	23.763	23.763	1	1	2.61806	9.07659	1.12033e-19	4.39169e-17	16.3574	TMB	PRE-TREATMENT
MAGEA10	96.0716	24.9735	24.9735	1	1	3.17804	7.85814	3.8987e-15	7.64145e-13	12.1168	TMB	PRE-TREATMENT
FCGR1A	2603.87	1.64618	1.64618	1	0	0.597691	2.75422	0.00588313	0.76873	0.114226	TMB	PRE-TREATMENT
CD74	17896.2	1.25325	1.25325	0	0	0.479315	2.61467	0.00893145	0.784271	0.105534	TMB	PRE-TREATMENT
EGFR	40648.1	2.26866	2.26866	1	1	0.903122	2.51202	0.0120041	0.784271	0.105534	TMB	PRE-TREATMENT
HLA-DOB	910.577	-1.09914	1.09914	0	0	0.432004	-2.54429	0.01095	0.784271	0.105534	TMB	PRE-TREATMENT
AIF1	7303.5	0.903665	0.903665	0	0	0.41451	2.18008	0.0292514	0.789375	0.102717	TMB	PRE-TREATMENT
B3GAT1	149.633	-2.71357	2.71357	1	1	1.46895	-1.84728	0.0647062	0.789375	0.102717	TMB	PRE-TREATMENT
BCL2L11	1965.56	-0.693777	0.693777	0	0	0.406985	-1.70467	0.0882554	0.789375	0.102717	TMB	PRE-TREATMENT
BRCA1	1250.6	-1.1107	1.1107	0	0	0.50714	-2.19012	0.0285153	0.789375	0.102717	TMB	PRE-TREATMENT
BRCA2	2194.38	-1.04286	1.04286	0	0	0.513033	-2.03273	0.04208	0.789375	0.102717	TMB	PRE-TREATMENT
C1QA	23857.9	0.97407	0.97407	0	0	0.506433	1.92339	0.0544306	0.789375	0.102717	TMB	PRE-TREATMENT
CCL18	15365.9	1.49039	1.49039	0	0	0.764274	1.95007	0.0511676	0.789375	0.102717	TMB	PRE-TREATMENT
CCL22	742.486	-1.44702	1.44702	0	0	0.757163	-1.9111	0.0559913	0.789375	0.102717	TMB	PRE-TREATMENT
CCR1	1503.32	1.00952	1.00952	0	0	0.461843	2.18585	0.0288267	0.789375	0.102717	TMB	PRE-TREATMENT
CD14	11038.1	1.05547	1.05547	0	0	0.516799	2.04233	0.0411187	0.789375	0.102717	TMB	PRE-TREATMENT
CD163	8703.7	0.920143	0.920143	0	0	0.521239	1.7653	0.0775136	0.789375	0.102717	TMB	PRE-TREATMENT
CD226	1689.35	-0.52858	0.52858	0	0	0.320094	-1.65133	0.0986719	0.789375	0.102717	TMB	PRE-TREATMENT
CD53	275.274	-1.13766	1.13766	0	0	0.681112	-1.6703	0.0948609	0.789375	0.102717	TMB	PRE-TREATMENT
CEACAM8	3.3964	-5.38142	5.38142	1	1	3.18551	-1.68934	0.0911542	0.789375	0.102717	TMB	PRE-TREATMENT
CTSS	10077.2	1.01685	1.01685	0	0	0.446382	2.27798	0.0227279	0.789375	0.102717	TMB	PRE-TREATMENT
CXCL10	7794.9	1.1097	1.1097	0	0	0.618675	1.79367	0.0728663	0.789375	0.102717	TMB	PRE-TREATMENT
FCER1G	13460.3	0.936494	0.936494	0	0	0.495597	1.88963	0.0588079	0.789375	0.102717	TMB	PRE-TREATMENT
FCGR3A	6181.22	0.875543	0.875543	0	0	0.468919	1.86715	0.0618803	0.789375	0.102717	TMB	PRE-TREATMENT
FOXM1	4704.65	-1.03847	1.03847	0	0	0.477066	-2.17678	0.0294972	0.789375	0.102717	TMB	PRE-TREATMENT
GAGE1	71.2831	5.24406	5.24406	1	1	2.84672	1.84214	0.0654546	0.789375	0.102717	TMB	PRE-TREATMENT
GPR18	202.797	-1.08376	1.08376	0	0	0.552019	-1.96327	0.0496152	0.789375	0.102717	TMB	PRE-TREATMENT
HLA-DPB1	25973.9	0.972848	0.972848	0	0	0.508226	1.9142	0.0555944	0.789375	0.102717	TMB	PRE-TREATMENT
HLA-DQA1	9790.57	1.87235	1.87235	1	0	0.894809	2.09245	0.0363979	0.789375	0.102717	TMB	PRE-TREATMENT
HLA-DQB2	152.957	-1.88156	1.88156	1	0	1.08042	-1.74151	0.0815951	0.789375	0.102717	TMB	PRE-TREATMENT
HLA-DRA	75828.2	1.042	1.042	0	0	0.511731	2.03623	0.0417272	0.789375	0.102717	TMB	PRE-TREATMENT
HMBS	1179.96	-0.715373	0.715373	0	0	0.379909	-1.88301	0.0596989	0.789375	0.102717	TMB	PRE-TREATMENT
IFNA17	1737.44	-1.37027	1.37027	0	0	0.77194	-1.77511	0.0758805	0.789375	0.102717	TMB	PRE-TREATMENT
IGSF6	1557.88	0.811947	0.811947	0	0	0.489467	1.65884	0.0971482	0.789375	0.102717	TMB	PRE-TREATMENT
IL10	341.846	1.27675	1.27675	0	0	0.576832	2.21338	0.0268714	0.789375	0.102717	TMB	PRE-TREATMENT
IL15	791.748	-0.66102	0.66102	0	0	0.354457	-1.86488	0.0621986	0.789375	0.102717	TMB	PRE-TREATMENT
IL1A	1624.05	2.05796	2.05796	1	1	1.1362	1.81126	0.0701009	0.789375	0.102717	TMB	PRE-TREATMENT
ITGAX	2990.32	0.861746	0.861746	0	0	0.437491	1.96975	0.0488676	0.789375	0.102717	TMB	PRE-TREATMENT
LAPTM5	16078.3	0.929375	0.929375	0	0	0.522268	1.7795	0.0751583	0.789375	0.102717	TMB	PRE-TREATMENT
LYZ	74874	1.46462	1.46462	0	0	0.612174	2.39249	0.0167343	0.789375	0.102717	TMB	PRE-TREATMENT
MAGEC2	12.4282	-5.64983	5.64983	1	1	3.18326	-1.77486	0.0759218	0.789375	0.102717	TMB	PRE-TREATMENT
NCR1	77.5399	-1.57665	1.57665	1	0	0.811852	-1.94204	0.0521326	0.789375	0.102717	TMB	PRE-TREATMENT
PIK3CD	2324.44	-0.450275	0.450275	0	0	0.271528	-1.6583	0.0972572	0.789375	0.102717	TMB	PRE-TREATMENT
S100A9	30245.5	-1.31393	1.31393	0	0	0.766978	-1.71312	0.0866899	0.789375	0.102717	TMB	PRE-TREATMENT
TLR7	657.226	1.23768	1.23768	0	0	0.721325	1.71585	0.0861895	0.789375	0.102717	TMB	PRE-TREATMENT
TLR8	569.551	0.929842	0.929842	0	0	0.539612	1.72317	0.0848585	0.789375	0.102717	TMB	PRE-TREATMENT
TOP2A	8277.79	-0.909341	0.909341	0	0	0.442899	-2.05316	0.0400575	0.789375	0.102717	TMB	PRE-TREATMENT
TYROBP	63101.8	0.717208	0.717208	0	0	0.399537	1.7951	0.072638	0.789375	0.102717	TMB	PRE-TREATMENT
VCAM1	4357.74	1.03836	1.03836	0	0	0.614348	1.69018	0.0909939	0.789375	0.102717	TMB	PRE-TREATMENT
HLA-C	29028.7	1.16535	1.16535	0	0	0.716342	1.6268	0.103779	0.813628	0.0895739	TMB	PRE-TREATMENT
CD86	1325.17	0.718624	0.718624	0	0	0.44816	1.6035	0.108825	0.820373	0.0859886	TMB	PRE-TREATMENT
CSF1R	2643.33	0.683771	0.683771	0	0	0.424275	1.61162	0.107044	0.820373	0.0859886	TMB	PRE-TREATMENT
CCL2	9198.37	0.901194	0.901194	0	0	0.567236	1.58875	0.112118	0.825304	0.0833861	TMB	PRE-TREATMENT
IKZF3	2605.53	-0.677276	0.677276	0	0	0.430653	-1.57267	0.115795	0.825304	0.0833861	TMB	PRE-TREATMENT
TNFSF4	160.754	0.913726	0.913726	0	0	0.578706	1.57891	0.114356	0.825304	0.0833861	TMB	PRE-TREATMENT
ADGRE5	10204.5	0.604483	0.604483	0	0	0.395153	1.52974	0.126081	0.830655	0.0805791	TMB	PRE-TREATMENT
CCL20	2231.13	-1.17444	1.17444	0	0	0.777257	-1.511	0.130788	0.830655	0.0805791	TMB	PRE-TREATMENT
CD19	362.875	-1.06805	1.06805	0	0	0.713728	-1.49644	0.13454	0.830655	0.0805791	TMB	PRE-TREATMENT
CXCL9	11246	1.15071	1.15071	0	0	0.77109	1.49231	0.135617	0.830655	0.0805791	TMB	PRE-TREATMENT
ITGB2	5922.44	0.700735	0.700735	0	0	0.464482	1.50864	0.131391	0.830655	0.0805791	TMB	PRE-TREATMENT
MRC1	7569.38	0.887187	0.887187	0	0	0.593707	1.49432	0.135092	0.830655	0.0805791	TMB	PRE-TREATMENT
PECAM1	6459.4	-1.02468	1.02468	0	0	0.673954	-1.52041	0.128409	0.830655	0.0805791	TMB	PRE-TREATMENT
PRF1	672.165	-0.760868	0.760868	0	0	0.492236	-1.54574	0.122168	0.830655	0.0805791	TMB	PRE-TREATMENT
TCF7	975.105	-0.728646	0.728646	0	0	0.468024	-1.55686	0.119504	0.830655	0.0805791	TMB	PRE-TREATMENT
IFNB1	889.106	-1.17831	1.17831	0	0	0.798032	-1.47652	0.139805	0.843134	0.0741036	TMB	PRE-TREATMENT
IL4	1.9811	4.6787	4.6787	1	1	3.19019	1.46659	0.142488	0.846293	0.0724794	TMB	PRE-TREATMENT
SH2D1B	135.423	-1.04327	1.04327	0	0	0.717888	-1.45325	0.146155	0.855114	0.0679761	TMB	PRE-TREATMENT
BCL2	1002.04	-0.660773	0.660773	0	0	0.49185	-1.34344	0.179129	0.891977	0.0496465	TMB	PRE-TREATMENT
BUB1	3129.53	-0.543321	0.543321	0	0	0.427991	-1.26947	0.204274	0.891977	0.0496465	TMB	PRE-TREATMENT
C1QB	41937.2	0.661319	0.661319	0	0	0.490578	1.34804	0.177645	0.891977	0.0496465	TMB	PRE-TREATMENT
CA4	44.6808	-1.51068	1.51068	1	0	1.18187	-1.27821	0.201176	0.891977	0.0496465	TMB	PRE-TREATMENT
CCL3	1807.44	0.862367	0.862367	0	0	0.639286	1.34896	0.177351	0.891977	0.0496465	TMB	PRE-TREATMENT
CD4	3521.59	0.594289	0.594289	0	0	0.456275	1.30248	0.192752	0.891977	0.0496465	TMB	PRE-TREATMENT
CD68	26363.5	0.642218	0.642218	0	0	0.469493	1.3679	0.171344	0.891977	0.0496465	TMB	PRE-TREATMENT
CORO1A	2550.27	-0.414548	0.414548	0	0	0.312408	-1.32694	0.184527	0.891977	0.0496465	TMB	PRE-TREATMENT
CXCR4	7117.97	0.57054	0.57054	0	0	0.422216	1.3513	0.1766	0.891977	0.0496465	TMB	PRE-TREATMENT
GRAP2	1254.87	-0.516624	0.516624	0	0	0.404348	-1.27767	0.201365	0.891977	0.0496465	TMB	PRE-TREATMENT
HAVCR2	3684.27	0.573168	0.573168	0	0	0.433168	1.3232	0.185769	0.891977	0.0496465	TMB	PRE-TREATMENT
HLA-DMB	1523.6	1.51678	1.51678	1	0	1.17263	1.29349	0.195842	0.891977	0.0496465	TMB	PRE-TREATMENT
IL17A	23.4615	2.76335	2.76335	1	1	2.12648	1.2995	0.193774	0.891977	0.0496465	TMB	PRE-TREATMENT
IL17F	2.38523	4.39325	4.39325	1	1	3.19252	1.37611	0.168789	0.891977	0.0496465	TMB	PRE-TREATMENT
LRP1	15050.7	0.569566	0.569566	0	0	0.417676	1.36365	0.172677	0.891977	0.0496465	TMB	PRE-TREATMENT
MYC	7587.04	-0.862801	0.862801	0	0	0.658837	-1.30958	0.190337	0.891977	0.0496465	TMB	PRE-TREATMENT
NRP1	10733.8	0.599689	0.599689	0	0	0.424734	1.41192	0.157974	0.891977	0.0496465	TMB	PRE-TREATMENT
PTK7	14319.2	-0.68265	0.68265	0	0	0.538359	-1.26802	0.204791	0.891977	0.0496465	TMB	PRE-TREATMENT
PTPRC	1210.1	-0.573913	0.573913	0	0	0.406843	-1.41065	0.158348	0.891977	0.0496465	TMB	PRE-TREATMENT
S100A8	41451.8	-1.24269	1.24269	0	0	0.957559	-1.29777	0.194368	0.891977	0.0496465	TMB	PRE-TREATMENT
SLAMF8	2731.32	0.847554	0.847554	0	0	0.615927	1.37606	0.168802	0.891977	0.0496465	TMB	PRE-TREATMENT
STAT3	17738.8	-0.392024	0.392024	0	0	0.304256	-1.28847	0.197582	0.891977	0.0496465	TMB	PRE-TREATMENT
TDO2	1282.91	0.816105	0.816105	0	0	0.634309	1.2866	0.198232	0.891977	0.0496465	TMB	PRE-TREATMENT
IL2RA	1282.45	0.616085	0.616085	0	0	0.493449	1.24853	0.211838	0.912534	0.0397512	TMB	PRE-TREATMENT
CCL17	627.112	-0.918671	0.918671	0	0	0.754133	-1.21818	0.223155	0.91284	0.0396053	TMB	PRE-TREATMENT
CD22	648.933	-0.537493	0.537493	0	0	0.447313	-1.2016	0.229517	0.91284	0.0396053	TMB	PRE-TREATMENT
CD63	48101.1	0.564194	0.564194	0	0	0.461201	1.22332	0.22121	0.91284	0.0396053	TMB	PRE-TREATMENT
EOMES	614.834	-0.722246	0.722246	0	0	0.594327	-1.21523	0.224277	0.91284	0.0396053	TMB	PRE-TREATMENT
IKZF1	11815.9	-0.690709	0.690709	0	0	0.562862	-1.22714	0.219771	0.91284	0.0396053	TMB	PRE-TREATMENT
IL23A	153.293	-0.94069	0.94069	0	0	0.796387	-1.1812	0.237525	0.91284	0.0396053	TMB	PRE-TREATMENT
KLRG1	571.611	-0.520422	0.520422	0	0	0.438316	-1.18732	0.2351	0.91284	0.0396053	TMB	PRE-TREATMENT
MELK	3636.36	-0.608576	0.608576	0	0	0.498226	-1.22148	0.221903	0.91284	0.0396053	TMB	PRE-TREATMENT
MS4A1	254.609	-0.95764	0.95764	0	0	0.80722	-1.18634	0.235487	0.91284	0.0396053	TMB	PRE-TREATMENT
SRGN	9575.87	0.439989	0.439989	0	0	0.368723	1.19328	0.232762	0.91284	0.0396053	TMB	PRE-TREATMENT
STAT6	14554.3	-0.45206	0.45206	0	0	0.37741	-1.1978	0.230996	0.91284	0.0396053	TMB	PRE-TREATMENT
CXCL8	11703.9	-0.76387	0.76387	0	0	0.656432	-1.16367	0.244558	0.920297	0.0360719	TMB	PRE-TREATMENT
MMP2	55727.7	0.811265	0.811265	0	0	0.700046	1.15887	0.246508	0.920297	0.0360719	TMB	PRE-TREATMENT
TWIST1	1843.09	0.729905	0.729905	0	0	0.628196	1.16191	0.245274	0.920297	0.0360719	TMB	PRE-TREATMENT
ZAP70	924.846	-0.475448	0.475448	0	0	0.412831	-1.15168	0.249454	0.92251	0.0350289	TMB	PRE-TREATMENT
AKT1	9002.87	-0.40272	0.40272	0	0	0.382356	-1.05326	0.292223	0.924709	0.033995	TMB	PRE-TREATMENT
CCR6	202.759	-0.545338	0.545338	0	0	0.49792	-1.09523	0.273415	0.924709	0.033995	TMB	PRE-TREATMENT
CD247	1141.3	-0.477731	0.477731	0	0	0.421846	-1.13248	0.257433	0.924709	0.033995	TMB	PRE-TREATMENT
CD27	517.734	-0.507661	0.507661	0	0	0.492974	-1.02979	0.303108	0.924709	0.033995	TMB	PRE-TREATMENT
CD28	1025.3	0.514689	0.514689	0	0	0.479182	1.0741	0.282778	0.924709	0.033995	TMB	PRE-TREATMENT
CYBB	9647.74	0.483446	0.483446	0	0	0.446816	1.08198	0.279261	0.924709	0.033995	TMB	PRE-TREATMENT
FASLG	580.242	-0.63713	0.63713	0	0	0.58053	-1.0975	0.272424	0.924709	0.033995	TMB	PRE-TREATMENT
FUT4	4233.08	-0.495141	0.495141	0	0	0.43859	-1.12894	0.258923	0.924709	0.033995	TMB	PRE-TREATMENT
FYB	7135.71	-0.410276	0.410276	0	0	0.397493	-1.03216	0.301997	0.924709	0.033995	TMB	PRE-TREATMENT
GBP1	12029.2	0.466341	0.466341	0	0	0.447551	1.04199	0.297419	0.924709	0.033995	TMB	PRE-TREATMENT
HLA-DPA1	60528.9	0.961296	0.961296	0	0	0.885145	1.08603	0.277465	0.924709	0.033995	TMB	PRE-TREATMENT
HLA-G	27.5342	-2.21101	2.21101	1	1	1.93372	-1.1434	0.252873	0.924709	0.033995	TMB	PRE-TREATMENT
IL12B	37.0672	-1.31781	1.31781	0	0	1.21727	-1.08259	0.278989	0.924709	0.033995	TMB	PRE-TREATMENT
IL2RB	3166.28	-0.515575	0.515575	0	0	0.465765	-1.10694	0.268318	0.924709	0.033995	TMB	PRE-TREATMENT
IL3RA	1158.14	0.463721	0.463721	0	0	0.419289	1.10597	0.26874	0.924709	0.033995	TMB	PRE-TREATMENT
IL6	1284.6	-0.763114	0.763114	0	0	0.738894	-1.03278	0.301708	0.924709	0.033995	TMB	PRE-TREATMENT
IRF1	7299.33	-0.399237	0.399237	0	0	0.382281	-1.04435	0.296322	0.924709	0.033995	TMB	PRE-TREATMENT
IRF4	4784.72	-0.846462	0.846462	0	0	0.757711	-1.11713	0.263938	0.924709	0.033995	TMB	PRE-TREATMENT
KLRK1	4731.02	-0.449278	0.449278	0	0	0.406401	-1.1055	0.268942	0.924709	0.033995	TMB	PRE-TREATMENT
MMP9	14342.1	-0.793573	0.793573	0	0	0.746201	-1.06348	0.287563	0.924709	0.033995	TMB	PRE-TREATMENT
NOTCH3	15473.5	-0.528548	0.528548	0	0	0.506245	-1.04405	0.29646	0.924709	0.033995	TMB	PRE-TREATMENT
PTPN11	11616.9	-0.463994	0.463994	0	0	0.451688	-1.02725	0.304305	0.924709	0.033995	TMB	PRE-TREATMENT
PVR	5522.93	-0.430186	0.430186	0	0	0.40753	-1.05559	0.291154	0.924709	0.033995	TMB	PRE-TREATMENT
CD79A	3712.81	-0.630001	0.630001	0	0	0.624775	-1.00836	0.31328	0.931823	0.0306665	TMB	PRE-TREATMENT
CSF2RB	11713.8	0.316626	0.316626	0	0	0.314322	1.00733	0.313777	0.931823	0.0306665	TMB	PRE-TREATMENT
M6PR	12894	-0.421989	0.421989	0	0	0.414921	-1.01703	0.309137	0.931823	0.0306665	TMB	PRE-TREATMENT
ABCF1	13516.7	-0.361211	0.361211	0	0	0.381906	-0.94581	0.344246	0.93979	0.0269693	TMB	PRE-TREATMENT
ALOX15B	452.425	0.770382	0.770382	0	0	0.886545	0.86897	0.384863	0.93979	0.0269693	TMB	PRE-TREATMENT
BST2	28218.6	0.311929	0.311929	0	0	0.354453	0.880028	0.378844	0.93979	0.0269693	TMB	PRE-TREATMENT
CD2	5733.63	0.369733	0.369733	0	0	0.415206	0.890479	0.373209	0.93979	0.0269693	TMB	PRE-TREATMENT
CD47	11918.9	-0.321655	0.321655	0	0	0.352325	-0.91295	0.361269	0.93979	0.0269693	TMB	PRE-TREATMENT
CD6	1310.12	-0.350994	0.350994	0	0	0.395967	-0.886422	0.37539	0.93979	0.0269693	TMB	PRE-TREATMENT
CD79B	484.02	-0.508468	0.508468	0	0	0.522107	-0.973876	0.330118	0.93979	0.0269693	TMB	PRE-TREATMENT
CDK1	3648.51	-0.502234	0.502234	0	0	0.549582	-0.913847	0.360797	0.93979	0.0269693	TMB	PRE-TREATMENT
CX3CR1	113.393	-0.543534	0.543534	0	0	0.608037	-0.893916	0.371367	0.93979	0.0269693	TMB	PRE-TREATMENT
CXCL13	2801.68	0.625382	0.625382	0	0	0.673465	0.928603	0.353095	0.93979	0.0269693	TMB	PRE-TREATMENT
GAGE13	0.631426	3.03755	3.03755	1	1	3.21263	0.945502	0.344403	0.93979	0.0269693	TMB	PRE-TREATMENT
GZMB	4153.55	0.577336	0.577336	0	0	0.60332	0.956932	0.338601	0.93979	0.0269693	TMB	PRE-TREATMENT
HLA-A	37502.3	1.43425	1.43425	0	0	1.63282	0.878392	0.379731	0.93979	0.0269693	TMB	PRE-TREATMENT
HLA-B	15636	1.31581	1.31581	0	0	1.45461	0.904581	0.365687	0.93979	0.0269693	TMB	PRE-TREATMENT
HLA-DRB1	101895	0.728817	0.728817	0	0	0.762016	0.956433	0.338853	0.93979	0.0269693	TMB	PRE-TREATMENT
IFI35	2947.17	-0.353334	0.353334	0	0	0.373565	-0.945845	0.344228	0.93979	0.0269693	TMB	PRE-TREATMENT
IFI6	20868.2	0.596975	0.596975	0	0	0.699141	0.85387	0.393177	0.93979	0.0269693	TMB	PRE-TREATMENT
IKZF4	193.915	-0.389891	0.389891	0	0	0.44645	-0.873315	0.382491	0.93979	0.0269693	TMB	PRE-TREATMENT
ITGAL	2366.19	-0.449597	0.449597	0	0	0.484971	-0.927059	0.353896	0.93979	0.0269693	TMB	PRE-TREATMENT
ITGAM	2078.7	0.334603	0.334603	0	0	0.376812	0.887983	0.37455	0.93979	0.0269693	TMB	PRE-TREATMENT
LILRB2	1207.63	0.355334	0.355334	0	0	0.414205	0.857869	0.390965	0.93979	0.0269693	TMB	PRE-TREATMENT
MAGEA4	129.993	2.56498	2.56498	1	1	2.9319	0.874851	0.381655	0.93979	0.0269693	TMB	PRE-TREATMENT
MAPK1	7542.18	-0.544104	0.544104	0	0	0.572308	-0.95072	0.341747	0.93979	0.0269693	TMB	PRE-TREATMENT
MAPK14	6147.59	-0.357952	0.357952	0	0	0.365852	-0.978406	0.327873	0.93979	0.0269693	TMB	PRE-TREATMENT
MTOR	6039.18	-0.355983	0.355983	0	0	0.375975	-0.946826	0.343727	0.93979	0.0269693	TMB	PRE-TREATMENT
PTEN	10168.5	0.349945	0.349945	0	0	0.368466	0.949735	0.342247	0.93979	0.0269693	TMB	PRE-TREATMENT
SLAMF7	14592.6	0.517149	0.517149	0	0	0.576521	0.897016	0.369711	0.93979	0.0269693	TMB	PRE-TREATMENT
STAT4	691.783	-0.323038	0.323038	0	0	0.365216	-0.884512	0.37642	0.93979	0.0269693	TMB	PRE-TREATMENT
STAT5A	2068.94	0.283001	0.283001	0	0	0.310161	0.912433	0.361541	0.93979	0.0269693	TMB	PRE-TREATMENT
TNFSF10	10001.1	-0.527689	0.527689	0	0	0.614159	-0.859207	0.390226	0.93979	0.0269693	TMB	PRE-TREATMENT
TNFSF18	329.019	-1.06285	1.06285	0	0	1.08331	-0.981112	0.326538	0.93979	0.0269693	TMB	PRE-TREATMENT
XAGE1B	1315.16	-2.32511	2.32511	1	1	2.72126	-0.854424	0.39287	0.93979	0.0269693	TMB	PRE-TREATMENT
BTLA	313.383	-0.422835	0.422835	0	0	0.511622	-0.82646	0.408543	0.942053	0.0259247	TMB	PRE-TREATMENT
CCR7	618.244	-0.404388	0.404388	0	0	0.478313	-0.845446	0.397862	0.942053	0.0259247	TMB	PRE-TREATMENT
CD69	1001.88	0.431235	0.431235	0	0	0.520914	0.827843	0.407759	0.942053	0.0259247	TMB	PRE-TREATMENT
FCGR2B	399.378	0.691369	0.691369	0	0	0.825959	0.837051	0.402564	0.942053	0.0259247	TMB	PRE-TREATMENT
HLA-DOA	1354.96	0.499701	0.499701	0	0	0.59245	0.843449	0.398978	0.942053	0.0259247	TMB	PRE-TREATMENT
LY9	119.77	-0.677983	0.677983	0	0	0.814468	-0.832425	0.405169	0.942053	0.0259247	TMB	PRE-TREATMENT
BATF	3656.31	-0.282306	0.282306	0	0	0.368837	-0.765395	0.444037	0.967761	0.0142319	TMB	PRE-TREATMENT
C10orf54	3640.47	-0.194155	0.194155	0	0	0.360275	-0.538908	0.58995	0.967761	0.0142319	TMB	PRE-TREATMENT
CCNB2	3438.92	-0.262103	0.262103	0	0	0.509329	-0.514604	0.606829	0.967761	0.0142319	TMB	PRE-TREATMENT
CCR2	521.744	0.513338	0.513338	0	0	0.790707	0.649213	0.5162	0.967761	0.0142319	TMB	PRE-TREATMENT
CD209	2807.97	0.329979	0.329979	0	0	0.522117	0.632002	0.527385	0.967761	0.0142319	TMB	PRE-TREATMENT
CD44	1977.59	-0.649882	0.649882	0	0	0.956968	-0.679106	0.497071	0.967761	0.0142319	TMB	PRE-TREATMENT
CD52	11582.5	-0.285584	0.285584	0	0	0.358445	-0.796731	0.425607	0.967761	0.0142319	TMB	PRE-TREATMENT
CD83	1731.64	0.314811	0.314811	0	0	0.524251	0.600497	0.548175	0.967761	0.0142319	TMB	PRE-TREATMENT
CDKN2A	12666.2	-0.446468	0.446468	0	0	0.874656	-0.51045	0.609736	0.967761	0.0142319	TMB	PRE-TREATMENT
CDKN3	2623.32	-0.290734	0.290734	0	0	0.46031	-0.631604	0.527645	0.967761	0.0142319	TMB	PRE-TREATMENT
CEACAM1	1171.41	-0.436907	0.436907	0	0	0.684703	-0.638097	0.52341	0.967761	0.0142319	TMB	PRE-TREATMENT
CTAG2	1.83624	2.07135	2.07135	1	1	3.20322	0.646646	0.517861	0.967761	0.0142319	TMB	PRE-TREATMENT
CXCL11	1665.5	0.495368	0.495368	0	0	0.698994	0.708686	0.478519	0.967761	0.0142319	TMB	PRE-TREATMENT
CXCR2	808.433	-0.462651	0.462651	0	0	0.754063	-0.613545	0.539516	0.967761	0.0142319	TMB	PRE-TREATMENT
CXCR5	144.756	-0.366077	0.366077	0	0	0.617674	-0.59267	0.553402	0.967761	0.0142319	TMB	PRE-TREATMENT
DDX58	10621.6	-0.339878	0.339878	0	0	0.483972	-0.702268	0.482512	0.967761	0.0142319	TMB	PRE-TREATMENT
DGAT2	431.591	-0.367023	0.367023	0	0	0.632572	-0.580207	0.561775	0.967761	0.0142319	TMB	PRE-TREATMENT
DMBT1	2011.75	0.799768	0.799768	0	0	1.51524	0.527816	0.597627	0.967761	0.0142319	TMB	PRE-TREATMENT
EFNA4	1178.58	-0.293907	0.293907	0	0	0.526658	-0.558061	0.576803	0.967761	0.0142319	TMB	PRE-TREATMENT
EGR2	1643.43	0.254988	0.254988	0	0	0.494414	0.515737	0.606038	0.967761	0.0142319	TMB	PRE-TREATMENT
EIF2AK2	17493.1	-0.28569	0.28569	0	0	0.481547	-0.593275	0.552997	0.967761	0.0142319	TMB	PRE-TREATMENT
G6PD	8232.07	-0.358955	0.358955	0	0	0.659668	-0.544145	0.586342	0.967761	0.0142319	TMB	PRE-TREATMENT
GADD45GIP1	11967.7	-0.319626	0.319626	0	0	0.517373	-0.617786	0.536717	0.967761	0.0142319	TMB	PRE-TREATMENT
GAGE2C	5.23389	1.69164	1.69164	1	0	3.12776	0.540847	0.588613	0.967761	0.0142319	TMB	PRE-TREATMENT
GZMA	1942.69	0.317786	0.317786	0	0	0.488611	0.650386	0.515443	0.967761	0.0142319	TMB	PRE-TREATMENT
GZMK	365.151	0.453965	0.453965	0	0	0.889472	0.510376	0.609788	0.967761	0.0142319	TMB	PRE-TREATMENT
HERC6	2059.18	-0.313712	0.313712	0	0	0.605444	-0.518152	0.604352	0.967761	0.0142319	TMB	PRE-TREATMENT
HLA-DQA2	10.8849	-0.908029	0.908029	0	0	1.55742	-0.583033	0.559871	0.967761	0.0142319	TMB	PRE-TREATMENT
ICAM1	9138.96	0.31031	0.31031	0	0	0.551798	0.562361	0.57387	0.967761	0.0142319	TMB	PRE-TREATMENT
ID3	1746.27	0.455182	0.455182	0	0	0.692268	0.657522	0.510845	0.967761	0.0142319	TMB	PRE-TREATMENT
IDO1	3553.07	0.609224	0.609224	0	0	0.788898	0.772246	0.439969	0.967761	0.0142319	TMB	PRE-TREATMENT
IFIT2	4021.52	-0.325724	0.325724	0	0	0.569481	-0.571966	0.567345	0.967761	0.0142319	TMB	PRE-TREATMENT
IFIT3	2358.33	-0.270133	0.270133	0	0	0.469161	-0.575778	0.564765	0.967761	0.0142319	TMB	PRE-TREATMENT
IFITM1	28076.1	0.296779	0.296779	0	0	0.395708	0.749995	0.453258	0.967761	0.0142319	TMB	PRE-TREATMENT
IFITM2	10889.2	0.31059	0.31059	0	0	0.439419	0.706819	0.479679	0.967761	0.0142319	TMB	PRE-TREATMENT
IFNG	263.868	0.447582	0.447582	0	0	0.827117	0.541135	0.588414	0.967761	0.0142319	TMB	PRE-TREATMENT
IKZF2	1474.89	-0.382535	0.382535	0	0	0.568111	-0.673346	0.500727	0.967761	0.0142319	TMB	PRE-TREATMENT
IL21	13.342	0.894567	0.894567	0	0	1.64836	0.542703	0.587335	0.967761	0.0142319	TMB	PRE-TREATMENT
IL22	0.991708	2.3081	2.3081	1	1	3.23417	0.713662	0.475436	0.967761	0.0142319	TMB	PRE-TREATMENT
IL2RG	2715.71	0.262259	0.262259	0	0	0.361732	0.72501	0.468446	0.967761	0.0142319	TMB	PRE-TREATMENT
IL7	361.855	-0.243909	0.243909	0	0	0.408329	-0.597334	0.550285	0.967761	0.0142319	TMB	PRE-TREATMENT
IRS1	4945.85	-0.292699	0.292699	0	0	0.493336	-0.593305	0.552977	0.967761	0.0142319	TMB	PRE-TREATMENT
ITK	943.615	-0.271093	0.271093	0	0	0.370043	-0.732599	0.463803	0.967761	0.0142319	TMB	PRE-TREATMENT
KIAA0101	1223.54	-0.442045	0.442045	0	0	0.620835	-0.712016	0.476455	0.967761	0.0142319	TMB	PRE-TREATMENT
KLRF1	74.1938	0.519549	0.519549	0	0	0.709996	0.731764	0.464313	0.967761	0.0142319	TMB	PRE-TREATMENT
LAG3	931.091	-0.386973	0.386973	0	0	0.501272	-0.771982	0.440125	0.967761	0.0142319	TMB	PRE-TREATMENT
LAMP1	2457.44	0.265228	0.265228	0	0	0.46051	0.575944	0.564653	0.967761	0.0142319	TMB	PRE-TREATMENT
LAMP3	2074.22	-0.432095	0.432095	0	0	0.68573	-0.630124	0.528613	0.967761	0.0142319	TMB	PRE-TREATMENT
LEXM	132.879	-0.446642	0.446642	0	0	0.862227	-0.518009	0.604452	0.967761	0.0142319	TMB	PRE-TREATMENT
LILRB1	605.344	0.396989	0.396989	0	0	0.524399	0.757037	0.449027	0.967761	0.0142319	TMB	PRE-TREATMENT
LST1	1132.86	0.339361	0.339361	0	0	0.536231	0.632864	0.526823	0.967761	0.0142319	TMB	PRE-TREATMENT
MAD2L1	1913.56	-0.35939	0.35939	0	0	0.491264	-0.731562	0.464436	0.967761	0.0142319	TMB	PRE-TREATMENT
MADCAM1	26.8317	1.10201	1.10201	0	0	1.93357	0.569938	0.56872	0.967761	0.0142319	TMB	PRE-TREATMENT
MIF	28826.1	-0.323038	0.323038	0	0	0.594714	-0.543182	0.587005	0.967761	0.0142319	TMB	PRE-TREATMENT
MKI67	3159.68	-0.281221	0.281221	0	0	0.42016	-0.66932	0.503292	0.967761	0.0142319	TMB	PRE-TREATMENT
MPO	53.1212	0.551801	0.551801	0	0	1.03727	0.531972	0.594746	0.967761	0.0142319	TMB	PRE-TREATMENT
NCAM1	379.938	-0.384272	0.384272	0	0	0.490622	-0.783235	0.433489	0.967761	0.0142319	TMB	PRE-TREATMENT
NT5E	2714.43	0.372862	0.372862	0	0	0.63928	0.583253	0.559723	0.967761	0.0142319	TMB	PRE-TREATMENT
OAS2	8493.53	-0.279237	0.279237	0	0	0.498508	-0.560145	0.575381	0.967761	0.0142319	TMB	PRE-TREATMENT
PDCD1	341.211	-0.385331	0.385331	0	0	0.595367	-0.647216	0.517492	0.967761	0.0142319	TMB	PRE-TREATMENT
PGF	1984.46	-0.379727	0.379727	0	0	0.661438	-0.574093	0.565905	0.967761	0.0142319	TMB	PRE-TREATMENT
POU2AF1	4648.43	-0.371274	0.371274	0	0	0.673656	-0.551133	0.581543	0.967761	0.0142319	TMB	PRE-TREATMENT
PTPN7	2863.44	-0.28508	0.28508	0	0	0.529818	-0.538071	0.590528	0.967761	0.0142319	TMB	PRE-TREATMENT
SELL	346.668	-0.248909	0.248909	0	0	0.445322	-0.558943	0.576201	0.967761	0.0142319	TMB	PRE-TREATMENT
SH2D1A	393.427	0.408914	0.408914	0	0	0.580586	0.704314	0.481237	0.967761	0.0142319	TMB	PRE-TREATMENT
STAT1	28962.5	0.266188	0.266188	0	0	0.388695	0.684824	0.493455	0.967761	0.0142319	TMB	PRE-TREATMENT
TAGAP	2447.29	0.358135	0.358135	0	0	0.520334	0.688279	0.491277	0.967761	0.0142319	TMB	PRE-TREATMENT
TBX21	494.282	-0.318569	0.318569	0	0	0.497345	-0.640538	0.521823	0.967761	0.0142319	TMB	PRE-TREATMENT
TFRC	21386.5	-0.398824	0.398824	0	0	0.67046	-0.594852	0.551942	0.967761	0.0142319	TMB	PRE-TREATMENT
TGFB1	21630.4	-0.190327	0.190327	0	0	0.337853	-0.563343	0.573201	0.967761	0.0142319	TMB	PRE-TREATMENT
TLR9	320.624	-0.246193	0.246193	0	0	0.445542	-0.552569	0.580559	0.967761	0.0142319	TMB	PRE-TREATMENT
TNFRSF18	1238.69	0.249115	0.249115	0	0	0.416702	0.597825	0.549957	0.967761	0.0142319	TMB	PRE-TREATMENT
TNFRSF9	1144.91	0.424084	0.424084	0	0	0.621846	0.681976	0.495254	0.967761	0.0142319	TMB	PRE-TREATMENT
TNFSF13B	3169.24	0.350861	0.350861	0	0	0.440556	0.796405	0.425797	0.967761	0.0142319	TMB	PRE-TREATMENT
TNFSF14	100.394	0.96572	0.96572	0	0	1.30404	0.740562	0.458959	0.967761	0.0142319	TMB	PRE-TREATMENT
TUBB	27910.6	-0.206632	0.206632	0	0	0.347486	-0.594649	0.552078	0.967761	0.0142319	TMB	PRE-TREATMENT
VEGFA	38190.6	0.38113	0.38113	0	0	0.572041	0.666264	0.505242	0.967761	0.0142319	TMB	PRE-TREATMENT
PSMB9	5530.99	-0.19801	0.19801	0	0	0.391339	-0.50598	0.612871	0.968731	0.0137968	TMB	PRE-TREATMENT
ARG1	25.3618	-0.872678	0.872678	0	0	2.60179	-0.335415	0.737312	0.969744	0.0133429	TMB	PRE-TREATMENT
AXL	2200.47	0.115384	0.115384	0	0	0.362252	0.31852	0.750091	0.969744	0.0133429	TMB	PRE-TREATMENT
CBLB	6518.87	-0.165372	0.165372	0	0	0.451564	-0.36622	0.714201	0.969744	0.0133429	TMB	PRE-TREATMENT
CCL5	4641.88	-0.162623	0.162623	0	0	0.449775	-0.361564	0.717678	0.969744	0.0133429	TMB	PRE-TREATMENT
CCR4	363.091	0.160282	0.160282	0	0	0.469815	0.341159	0.732984	0.969744	0.0133429	TMB	PRE-TREATMENT
CD1C	508.499	-0.231683	0.231683	0	0	0.638761	-0.362706	0.716824	0.969744	0.0133429	TMB	PRE-TREATMENT
CD1D	76.4337	-0.326914	0.326914	0	0	0.73418	-0.445278	0.656119	0.969744	0.0133429	TMB	PRE-TREATMENT
CD274	1662.48	0.238345	0.238345	0	0	0.601025	0.396565	0.691688	0.969744	0.0133429	TMB	PRE-TREATMENT
CD3D	2874.86	0.164939	0.164939	0	0	0.40542	0.406834	0.68413	0.969744	0.0133429	TMB	PRE-TREATMENT
CD3E	5466.75	-0.152315	0.152315	0	0	0.413188	-0.368634	0.712401	0.969744	0.0133429	TMB	PRE-TREATMENT
CD80	3737.57	-0.166638	0.166638	0	0	0.39399	-0.42295	0.672332	0.969744	0.0133429	TMB	PRE-TREATMENT
CD8B	759.034	0.174371	0.174371	0	0	0.468342	0.372316	0.709658	0.969744	0.0133429	TMB	PRE-TREATMENT
CMKLR1	14.2984	0.714932	0.714932	0	0	2.08376	0.343097	0.731526	0.969744	0.0133429	TMB	PRE-TREATMENT
CRTAM	409.144	-0.231011	0.231011	0	0	0.621643	-0.371614	0.71018	0.969744	0.0133429	TMB	PRE-TREATMENT
CX3CL1	1432.78	0.20663	0.20663	0	0	0.60497	0.341555	0.732686	0.969744	0.0133429	TMB	PRE-TREATMENT
CXCR3	37.1301	-0.460958	0.460958	0	0	1.07456	-0.428973	0.667943	0.969744	0.0133429	TMB	PRE-TREATMENT
FCRLA	184.213	-0.378025	0.378025	0	0	0.860531	-0.439293	0.660449	0.969744	0.0133429	TMB	PRE-TREATMENT
GAGE10	9.74211	-1.02992	1.02992	0	0	2.38872	-0.431159	0.666353	0.969744	0.0133429	TMB	PRE-TREATMENT
GAGE12J	1.29359	-1.1534	1.1534	0	0	3.17103	-0.363732	0.716058	0.969744	0.0133429	TMB	PRE-TREATMENT
GATA3	656.22	-0.195382	0.195382	0	0	0.46452	-0.42061	0.67404	0.969744	0.0133429	TMB	PRE-TREATMENT
GUSB	6818.47	-0.165338	0.165338	0	0	0.441172	-0.374771	0.707831	0.969744	0.0133429	TMB	PRE-TREATMENT
GZMH	1102.93	-0.19848	0.19848	0	0	0.549689	-0.361077	0.718042	0.969744	0.0133429	TMB	PRE-TREATMENT
HLA-F	691.435	0.147989	0.147989	0	0	0.423795	0.3492	0.726939	0.969744	0.0133429	TMB	PRE-TREATMENT
HLA-F-AS1	32.1192	0.36303	0.36303	0	0	1.09353	0.331981	0.739904	0.969744	0.0133429	TMB	PRE-TREATMENT
ICOS	197.632	0.128898	0.128898	0	0	0.41341	0.311791	0.755199	0.969744	0.0133429	TMB	PRE-TREATMENT
ID2	7791.52	-0.228658	0.228658	0	0	0.465383	-0.491334	0.62319	0.969744	0.0133429	TMB	PRE-TREATMENT
IGF1R	32697.9	-0.207635	0.207635	0	0	0.526061	-0.394698	0.693066	0.969744	0.0133429	TMB	PRE-TREATMENT
IL13	10.9335	0.950576	0.950576	0	0	2.0285	0.468612	0.639347	0.969744	0.0133429	TMB	PRE-TREATMENT
IL1B	2032.56	-0.228284	0.228284	0	0	0.607323	-0.375886	0.707002	0.969744	0.0133429	TMB	PRE-TREATMENT
ITGA1	5622.09	0.166162	0.166162	0	0	0.469366	0.354013	0.723329	0.969744	0.0133429	TMB	PRE-TREATMENT
ITGB1	41838.7	-0.206821	0.206821	0	0	0.47127	-0.438858	0.660764	0.969744	0.0133429	TMB	PRE-TREATMENT
ITGB7	2198.03	0.170542	0.170542	0	0	0.385362	0.442551	0.658091	0.969744	0.0133429	TMB	PRE-TREATMENT
JAML	546.996	0.219575	0.219575	0	0	0.467344	0.469836	0.638472	0.969744	0.0133429	TMB	PRE-TREATMENT
KIR2DL3	14.2715	1.17703	1.17703	0	0	2.47714	0.475156	0.634675	0.969744	0.0133429	TMB	PRE-TREATMENT
KRT7	18721.7	-0.424217	0.424217	0	0	0.865929	-0.489898	0.624206	0.969744	0.0133429	TMB	PRE-TREATMENT
MAGEA12	54.7287	-0.840019	0.840019	0	0	2.26749	-0.370461	0.711039	0.969744	0.0133429	TMB	PRE-TREATMENT
MAGEA3	237.745	0.698563	0.698563	0	0	1.67136	0.41796	0.675976	0.969744	0.0133429	TMB	PRE-TREATMENT
NCF1	6871.65	0.24203	0.24203	0	0	0.51316	0.471647	0.637179	0.969744	0.0133429	TMB	PRE-TREATMENT
NFATC1	415.481	0.266422	0.266422	0	0	0.565305	0.471289	0.637434	0.969744	0.0133429	TMB	PRE-TREATMENT
NFKBIA	12291.2	0.116866	0.116866	0	0	0.377682	0.309431	0.756994	0.969744	0.0133429	TMB	PRE-TREATMENT
NKG7	5274.27	-0.296671	0.296671	0	0	0.620475	-0.478136	0.632553	0.969744	0.0133429	TMB	PRE-TREATMENT
NTN3	66.0524	0.443542	0.443542	0	0	1.11476	0.39788	0.690718	0.969744	0.0133429	TMB	PRE-TREATMENT
OAS1	12306.1	-0.222724	0.222724	0	0	0.646576	-0.344466	0.730496	0.969744	0.0133429	TMB	PRE-TREATMENT
OAS3	4581.88	-0.207848	0.207848	0	0	0.499198	-0.416364	0.677144	0.969744	0.0133429	TMB	PRE-TREATMENT
POLR2A	29135.5	0.155235	0.155235	0	0	0.473862	0.327596	0.743217	0.969744	0.0133429	TMB	PRE-TREATMENT
PRDM1	8877.37	0.147578	0.147578	0	0	0.449504	0.328314	0.742674	0.969744	0.0133429	TMB	PRE-TREATMENT
RORC	1094.29	-0.284406	0.284406	0	0	0.896385	-0.317281	0.75103	0.969744	0.0133429	TMB	PRE-TREATMENT
RPS6	92488.6	-0.168362	0.168362	0	0	0.439768	-0.382844	0.701836	0.969744	0.0133429	TMB	PRE-TREATMENT
SNAI2	4203.11	-0.2266	0.2266	0	0	0.668848	-0.338791	0.734767	0.969744	0.0133429	TMB	PRE-TREATMENT
TAP1	19187.6	-0.200455	0.200455	0	0	0.416836	-0.480896	0.63059	0.969744	0.0133429	TMB	PRE-TREATMENT
TNFAIP8	1665.91	0.142486	0.142486	0	0	0.39744	0.35851	0.719962	0.969744	0.0133429	TMB	PRE-TREATMENT
TNFRSF14	3828.17	0.118029	0.118029	0	0	0.363903	0.324342	0.745679	0.969744	0.0133429	TMB	PRE-TREATMENT
TNFRSF4	495.158	-0.209128	0.209128	0	0	0.490691	-0.426191	0.669969	0.969744	0.0133429	TMB	PRE-TREATMENT
TNFSF9	162.045	-0.233753	0.233753	0	0	0.746602	-0.313089	0.754213	0.969744	0.0133429	TMB	PRE-TREATMENT
TP63	151.393	0.451311	0.451311	0	0	1.18885	0.379621	0.704227	0.969744	0.0133429	TMB	PRE-TREATMENT
VTCN1	190.465	-0.47995	0.47995	0	0	1.24193	-0.386456	0.699159	0.969744	0.0133429	TMB	PRE-TREATMENT
ZBTB46	264.669	-0.16891	0.16891	0	0	0.502037	-0.336448	0.736533	0.969744	0.0133429	TMB	PRE-TREATMENT
ZEB1	3174.59	0.139296	0.139296	0	0	0.387237	0.359718	0.719058	0.969744	0.0133429	TMB	PRE-TREATMENT
BCL6	16144.5	-0.161585	0.161585	0	0	0.552992	-0.292201	0.770133	0.976303	0.0104152	TMB	PRE-TREATMENT
CCL21	4658.84	0.254254	0.254254	0	0	0.976874	0.260273	0.794654	0.976303	0.0104152	TMB	PRE-TREATMENT
CD160	73.4843	0.18684	0.18684	0	0	0.863988	0.216253	0.828791	0.976303	0.0104152	TMB	PRE-TREATMENT
CD244	290.29	-0.113197	0.113197	0	0	0.41164	-0.27499	0.783324	0.976303	0.0104152	TMB	PRE-TREATMENT
CD276	2453.95	0.114184	0.114184	0	0	0.537458	0.212452	0.831755	0.976303	0.0104152	TMB	PRE-TREATMENT
CD48	962.309	0.10893	0.10893	0	0	0.437443	0.249015	0.803349	0.976303	0.0104152	TMB	PRE-TREATMENT
CD8A	2085.5	-0.115563	0.115563	0	0	0.505179	-0.228757	0.819058	0.976303	0.0104152	TMB	PRE-TREATMENT
CXCR6	529.771	-0.118369	0.118369	0	0	0.479786	-0.246712	0.805131	0.976303	0.0104152	TMB	PRE-TREATMENT
EGR3	1177.2	-0.164906	0.164906	0	0	0.688881	-0.239382	0.810809	0.976303	0.0104152	TMB	PRE-TREATMENT
FAS	3213.65	-0.0741681	0.0741681	0	0	0.315647	-0.234971	0.814231	0.976303	0.0104152	TMB	PRE-TREATMENT
FCGR3B	797.643	-0.199278	0.199278	0	0	0.706219	-0.282176	0.777809	0.976303	0.0104152	TMB	PRE-TREATMENT
HGF	538.315	-0.23019	0.23019	0	0	0.900602	-0.255596	0.798263	0.976303	0.0104152	TMB	PRE-TREATMENT
IFI27	7441.01	0.206534	0.206534	0	0	0.744604	0.277375	0.781492	0.976303	0.0104152	TMB	PRE-TREATMENT
IFI44L	4974.66	-0.171324	0.171324	0	0	0.586024	-0.29235	0.770019	0.976303	0.0104152	TMB	PRE-TREATMENT
IL18	3655.52	0.100054	0.100054	0	0	0.428096	0.233718	0.815204	0.976303	0.0104152	TMB	PRE-TREATMENT
IL2	6.76669	-0.780069	0.780069	0	0	3.09864	-0.251746	0.801237	0.976303	0.0104152	TMB	PRE-TREATMENT
IRF9	16033.5	-0.104127	0.104127	0	0	0.400324	-0.260107	0.794782	0.976303	0.0104152	TMB	PRE-TREATMENT
KLRB1	1069.87	0.140446	0.140446	0	0	0.521199	0.269466	0.787571	0.976303	0.0104152	TMB	PRE-TREATMENT
KRT5	183307	-0.339322	0.339322	0	0	1.55953	-0.21758	0.827756	0.976303	0.0104152	TMB	PRE-TREATMENT
LCN2	77204.7	-0.216736	0.216736	0	0	0.865573	-0.250396	0.802281	0.976303	0.0104152	TMB	PRE-TREATMENT
NECTIN2	1668.14	-0.112553	0.112553	0	0	0.405726	-0.277412	0.781464	0.976303	0.0104152	TMB	PRE-TREATMENT
PIK3CA	4121.36	-0.107628	0.107628	0	0	0.50689	-0.212329	0.83185	0.976303	0.0104152	TMB	PRE-TREATMENT
PMEL	108.149	0.23409	0.23409	0	0	0.863651	0.271046	0.786355	0.976303	0.0104152	TMB	PRE-TREATMENT
PTPN6	9095.05	-0.102153	0.102153	0	0	0.344554	-0.296479	0.766864	0.976303	0.0104152	TMB	PRE-TREATMENT
SNAI1	492.166	0.166457	0.166457	0	0	0.770226	0.216114	0.828899	0.976303	0.0104152	TMB	PRE-TREATMENT
TBP	2952.31	-0.10551	0.10551	0	0	0.459217	-0.22976	0.818278	0.976303	0.0104152	TMB	PRE-TREATMENT
TIGIT	636.169	-0.136285	0.136285	0	0	0.573168	-0.237776	0.812055	0.976303	0.0104152	TMB	PRE-TREATMENT
TLR3	369.321	0.0992785	0.0992785	0	0	0.461048	0.215332	0.829508	0.976303	0.0104152	TMB	PRE-TREATMENT
HLA-E	71244.3	-0.0673607	0.0673607	0	0	0.327364	-0.205767	0.836973	0.979383	0.00904744	TMB	PRE-TREATMENT
CD38	2724.97	-0.113232	0.113232	0	0	0.577822	-0.195964	0.844638	0.985411	0.00638252	TMB	PRE-TREATMENT
IL7R	4921.58	0.114822	0.114822	0	0	0.606799	0.189226	0.849916	0.987904	0.0052851	TMB	PRE-TREATMENT
ISG20	4126.39	-0.0848833	0.0848833	0	0	0.454401	-0.186803	0.851815	0.987904	0.0052851	TMB	PRE-TREATMENT
CD70	105.941	0.14132	0.14132	0	0	0.80154	0.17631	0.86005	0.993725	0.00273365	TMB	PRE-TREATMENT
FOXP3	544.066	-0.0847298	0.0847298	0	0	0.490875	-0.17261	0.862958	0.993725	0.00273365	TMB	PRE-TREATMENT
KIR2DL2	2.52733	0.548721	0.548721	0	0	3.21405	0.170725	0.86444	0.993725	0.00273365	TMB	PRE-TREATMENT
GNLY	5574.17	-0.095414	0.095414	0	0	0.596702	-0.159902	0.872958	0.995087	0.00213877	TMB	PRE-TREATMENT
IFIH1	2838.72	-0.0796531	0.0796531	0	0	0.500446	-0.159164	0.873539	0.995087	0.00213877	TMB	PRE-TREATMENT
NCR3	63.168	-0.211974	0.211974	0	0	1.356	-0.156323	0.875778	0.995087	0.00213877	TMB	PRE-TREATMENT
RB1	4869.46	-0.0709036	0.0709036	0	0	0.453343	-0.156402	0.875716	0.995087	0.00213877	TMB	PRE-TREATMENT
ADORA2A	869.906	-0.066529	0.066529	0	0	0.470672	-0.141349	0.887594	0.997259	0.00119185	TMB	PRE-TREATMENT
BAGE	10.4776	0.074873	0.074873	0	0	3.27171	0.022885	0.981742	0.997259	0.00119185	TMB	PRE-TREATMENT
CCL4	3988.44	-0.0126532	0.0126532	0	0	0.467516	-0.0270646	0.978408	0.997259	0.00119185	TMB	PRE-TREATMENT
CD33	1361.05	0.041954	0.041954	0	0	0.346008	0.121251	0.903492	0.997259	0.00119185	TMB	PRE-TREATMENT
CD37	4441.96	-0.0486492	0.0486492	0	0	0.480847	-0.101174	0.919412	0.997259	0.00119185	TMB	PRE-TREATMENT
CD3G	3199.82	-0.0331103	0.0331103	0	0	0.40611	-0.0815305	0.93502	0.997259	0.00119185	TMB	PRE-TREATMENT
CD40	1439.8	-0.00650525	0.00650525	0	0	0.298314	-0.0218067	0.982602	0.997259	0.00119185	TMB	PRE-TREATMENT
CD40LG	191.184	0.00959598	0.00959598	0	0	0.808804	0.0118644	0.990534	0.997259	0.00119185	TMB	PRE-TREATMENT
CIITA	11638.2	-0.0075355	0.0075355	0	0	0.439862	-0.0171315	0.986332	0.997259	0.00119185	TMB	PRE-TREATMENT
CLEC4C	88.5969	0.112362	0.112362	0	0	1.33513	0.0841585	0.93293	0.997259	0.00119185	TMB	PRE-TREATMENT
CTLA4	391.323	-0.0322164	0.0322164	0	0	0.485847	-0.0663098	0.947131	0.997259	0.00119185	TMB	PRE-TREATMENT
CXCL1	15604.1	0.079154	0.079154	0	0	0.721303	0.109738	0.912618	0.997259	0.00119185	TMB	PRE-TREATMENT
EBI3	272.017	0.0192448	0.0192448	0	0	0.706699	0.027232	0.978275	0.997259	0.00119185	TMB	PRE-TREATMENT
ENTPD1	4548.47	0.0271118	0.0271118	0	0	0.37979	0.0713861	0.94309	0.997259	0.00119185	TMB	PRE-TREATMENT
FOXO1	7241	-0.0497003	0.0497003	0	0	0.415789	-0.119532	0.904854	0.997259	0.00119185	TMB	PRE-TREATMENT
HIF1A	14188	-0.0699078	0.0699078	0	0	0.508514	-0.137475	0.890656	0.997259	0.00119185	TMB	PRE-TREATMENT
HLA-DMA	11857.2	0.0106655	0.0106655	0	0	0.454903	0.0234455	0.981295	0.997259	0.00119185	TMB	PRE-TREATMENT
ICOSLG	1791.1	0.0320252	0.0320252	0	0	0.432965	0.0739672	0.941036	0.997259	0.00119185	TMB	PRE-TREATMENT
IDO2	32.1767	-0.0172041	0.0172041	0	0	1.75339	-0.00981189	0.992171	0.997259	0.00119185	TMB	PRE-TREATMENT
IL10RA	5454	0.0389167	0.0389167	0	0	0.416601	0.0934149	0.925574	0.997259	0.00119185	TMB	PRE-TREATMENT
IL12A	346.359	-0.0317444	0.0317444	0	0	0.696141	-0.0456006	0.963629	0.997259	0.00119185	TMB	PRE-TREATMENT
ISG15	14300.6	0.0289272	0.0289272	0	0	0.72749	0.039763	0.968282	0.997259	0.00119185	TMB	PRE-TREATMENT
ITGAE	1062.61	0.00894604	0.00894604	0	0	0.322853	0.0277093	0.977894	0.997259	0.00119185	TMB	PRE-TREATMENT
JCHAIN	13782.5	0.030683	0.030683	0	0	0.747377	0.0410543	0.967253	0.997259	0.00119185	TMB	PRE-TREATMENT
KIR2DL1	0.469499	0.074873	0.074873	0	0	3.27171	0.022885	0.981742	0.997259	0.00119185	TMB	PRE-TREATMENT
KLF2	3553.9	-0.0248191	0.0248191	0	0	0.45927	-0.0540405	0.956903	0.997259	0.00119185	TMB	PRE-TREATMENT
KLRD1	890.319	-0.0616796	0.0616796	0	0	0.552755	-0.111586	0.911152	0.997259	0.00119185	TMB	PRE-TREATMENT
KREMEN1	3585.65	0.074604	0.074604	0	0	0.709568	0.10514	0.916265	0.997259	0.00119185	TMB	PRE-TREATMENT
LCK	49.1344	-0.14271	0.14271	0	0	1.0214	-0.13972	0.888881	0.997259	0.00119185	TMB	PRE-TREATMENT
LMNA	23726.8	0.0457101	0.0457101	0	0	0.466053	0.0980793	0.921869	0.997259	0.00119185	TMB	PRE-TREATMENT
LRG1	1568.41	0.0847601	0.0847601	0	0	0.77579	0.109257	0.912999	0.997259	0.00119185	TMB	PRE-TREATMENT
MX1	19036.7	-0.0841504	0.0841504	0	0	0.699951	-0.120223	0.904306	0.997259	0.00119185	TMB	PRE-TREATMENT
NOS2	105.408	0.155438	0.155438	0	0	1.59624	0.0973776	0.922427	0.997259	0.00119185	TMB	PRE-TREATMENT
PDCD1LG2	1712.17	-0.065432	0.065432	0	0	0.499126	-0.131093	0.895702	0.997259	0.00119185	TMB	PRE-TREATMENT
PTGS2	1710.91	-0.0389152	0.0389152	0	0	0.5993	-0.0649344	0.948226	0.997259	0.00119185	TMB	PRE-TREATMENT
PTPRCAP	29.2183	-0.164246	0.164246	0	0	1.61394	-0.101767	0.918941	0.997259	0.00119185	TMB	PRE-TREATMENT
PYGL	9693.65	-0.0491362	0.0491362	0	0	0.603455	-0.0814248	0.935104	0.997259	0.00119185	TMB	PRE-TREATMENT
SAMHD1	6427.68	-0.00979119	0.00979119	0	0	0.356211	-0.027487	0.978071	0.997259	0.00119185	TMB	PRE-TREATMENT
SDHA	8651.76	0.00481455	0.00481455	0	0	0.433884	0.0110964	0.991147	0.997259	0.00119185	TMB	PRE-TREATMENT
SIT1	444.793	-0.0269455	0.0269455	0	0	0.464369	-0.0580261	0.953728	0.997259	0.00119185	TMB	PRE-TREATMENT
SKAP2	2387.74	-0.015497	0.015497	0	0	0.401173	-0.0386292	0.969186	0.997259	0.00119185	TMB	PRE-TREATMENT
TARP	774.982	-0.0372698	0.0372698	0	0	0.367362	-0.101453	0.919191	0.997259	0.00119185	TMB	PRE-TREATMENT
TNF	703.122	-0.0577681	0.0577681	0	0	0.394024	-0.146611	0.883439	0.997259	0.00119185	TMB	PRE-TREATMENT
TNFRSF17	321.218	0.0147206	0.0147206	0	0	0.849086	0.017337	0.986168	0.997259	0.00119185	TMB	PRE-TREATMENT
TRIM29	32820.5	-0.0857435	0.0857435	0	0	1.37649	-0.0622913	0.950331	0.997259	0.00119185	TMB	PRE-TREATMENT
IFIT1	3979.28	-0.00387748	0.00387748	0	0	0.768291	-0.00504689	0.995973	0.99852	0.000643046	TMB	PRE-TREATMENT
CCR5	2718.42	-0.000276815	0.000276815	0	0	0.461588	-0.0005997	0.999522	0.999522	0.000207856	TMB	PRE-TREATMENT
CTAG1B	0	0	0	0	0	0	0	1	NA	#VALUE!	TMB	PRE-TREATMENT
MLANA	0	NA	#VALUE!	#VALUE!	#VALUE!	NA	NA	NA	NA	#VALUE!	TMB	PRE-TREATMENT
SSX2	0	NA	#VALUE!	#VALUE!	#VALUE!	NA	NA	NA	NA	#VALUE!	TMB	PRE-TREATMENT
IFI27	5910.24	-2.44673	2.44673	1	1	0.445574	-5.49118	3.99253e-08	1.54511e-05	4.81104	TMB	POST-TREATMENT
ISG15	3345.46	-2.27108	2.27108	1	1	0.454125	-5.00099	5.70368e-07	0.000110366	3.95716	TMB	POST-TREATMENT
BUB1	901.927	-2.98943	2.98943	1	1	0.665219	-4.4939	6.99292e-06	0.000902087	3.04475	TMB	POST-TREATMENT
FOXM1	975.899	-3.76317	3.76317	1	1	0.865045	-4.35026	1.35975e-05	0.00131556	2.88089	TMB	POST-TREATMENT
KREMEN1	1129.41	-1.68029	1.68029	1	0	0.393923	-4.26552	1.99438e-05	0.00154365	2.81145	TMB	POST-TREATMENT
OAS2	3342.16	-1.28402	1.28402	0	0	0.304722	-4.21373	2.51184e-05	0.00162014	2.79045	TMB	POST-TREATMENT
OAS3	1457.63	-1.87006	1.87006	1	0	0.46061	-4.05996	4.90813e-05	0.00271349	2.56647	TMB	POST-TREATMENT
G6PD	3620.85	-1.94538	1.94538	1	0	0.524135	-3.71161	0.000205947	0.00996267	2.00162	TMB	POST-TREATMENT
MKI67	841.066	-2.92637	2.92637	1	1	0.836187	-3.49966	0.000465857	0.0180287	1.74404	TMB	POST-TREATMENT
TOP2A	938.938	-2.70131	2.70131	1	1	0.771623	-3.50082	0.000463837	0.0180287	1.74404	TMB	POST-TREATMENT
HERC6	647.984	-1.19336	1.19336	0	0	0.357417	-3.33883	0.000841311	0.0271323	1.56651	TMB	POST-TREATMENT
HMBS	585.315	-1.70143	1.70143	1	0	0.5082	-3.34796	0.000814091	0.0271323	1.56651	TMB	POST-TREATMENT
MX1	4282.31	-1.29663	1.29663	0	0	0.399548	-3.24523	0.00117355	0.0324403	1.48891	TMB	POST-TREATMENT
S100A8	5830.55	-1.79106	1.79106	1	0	0.549754	-3.25794	0.00112225	0.0324403	1.48891	TMB	POST-TREATMENT
BRCA1	263.207	-2.22713	2.22713	1	1	0.699097	-3.18572	0.00144393	0.0350285	1.45558	TMB	POST-TREATMENT
IFI6	5885.67	-0.852226	0.852226	0	0	0.270474	-3.15086	0.00162792	0.0350285	1.45558	TMB	POST-TREATMENT
KIAA0101	604.998	-2.88595	2.88595	1	1	0.915995	-3.15062	0.00162923	0.0350285	1.45558	TMB	POST-TREATMENT
M6PR	9794.64	-0.767881	0.767881	0	0	0.243659	-3.15145	0.00162461	0.0350285	1.45558	TMB	POST-TREATMENT
VTCN1	12.1165	-4.57942	4.57942	1	1	1.48142	-3.09123	0.00199326	0.0405996	1.39148	TMB	POST-TREATMENT
TNFSF10	3511.18	-1.02554	1.02554	0	0	0.340675	-3.01032	0.00260969	0.0504975	1.29673	TMB	POST-TREATMENT
TNFRSF18	599.956	-2.02922	2.02922	1	1	0.680868	-2.98035	0.0028792	0.0530595	1.27524	TMB	POST-TREATMENT
PYGL	3108.43	-0.9788	0.9788	0	0	0.332158	-2.94679	0.00321095	0.0564835	1.24808	TMB	POST-TREATMENT
MIF	8493.47	-1.02614	1.02614	0	0	0.361729	-2.83677	0.00455722	0.0766802	1.11532	TMB	POST-TREATMENT
RB1	5308.95	-1.16174	1.16174	0	0	0.41943	-2.76981	0.00560885	0.0877231	1.05689	TMB	POST-TREATMENT
S100A9	5664.75	-1.48232	1.48232	0	0	0.53582	-2.76646	0.00566687	0.0877231	1.05689	TMB	POST-TREATMENT
LAMP1	2222.54	-0.741155	0.741155	0	0	0.276009	-2.68526	0.00724734	0.107874	0.967083	TMB	POST-TREATMENT
IFI44L	1558.23	-1.07632	1.07632	0	0	0.403667	-2.66635	0.00766803	0.109908	0.958969	TMB	POST-TREATMENT
LRG1	517.067	-1.09872	1.09872	0	0	0.421052	-2.60946	0.00906842	0.125339	0.901915	TMB	POST-TREATMENT
IFIH1	1318.05	-0.830771	0.830771	0	0	0.322482	-2.57618	0.00998996	0.133314	0.875123	TMB	POST-TREATMENT
IFIT1	1247	-1.28246	1.28246	0	0	0.500445	-2.56264	0.0103879	0.134004	0.872881	TMB	POST-TREATMENT
IRS1	4153.94	-1.07397	1.07397	0	0	0.422073	-2.54452	0.0109427	0.13563	0.867644	TMB	POST-TREATMENT
LCN2	14166	-1.5594	1.5594	1	0	0.614922	-2.53593	0.0112149	0.13563	0.867644	TMB	POST-TREATMENT
DGAT2	259.718	-1.5918	1.5918	1	0	0.644711	-2.46901	0.0135488	0.15889	0.798904	TMB	POST-TREATMENT
IFIT3	788.664	-1.0877	1.0877	0	0	0.455069	-2.39018	0.0168402	0.191681	0.71742	TMB	POST-TREATMENT
TBP	1238.92	-0.813537	0.813537	0	0	0.344983	-2.35819	0.0183641	0.203055	0.692387	TMB	POST-TREATMENT
DDX58	4436.15	-0.869653	0.869653	0	0	0.373787	-2.3266	0.0199867	0.214857	0.667851	TMB	POST-TREATMENT
OAS1	1971.04	-0.702491	0.702491	0	0	0.305122	-2.30233	0.0213165	0.217092	0.663357	TMB	POST-TREATMENT
PTPN11	8419.06	-0.812911	0.812911	0	0	0.352152	-2.30841	0.0209765	0.217092	0.663357	TMB	POST-TREATMENT
TUBB	16381.6	-0.812392	0.812392	0	0	0.36217	-2.24313	0.0248887	0.246973	0.607351	TMB	POST-TREATMENT
EGR3	3806.79	1.15691	1.15691	0	0	0.521973	2.21642	0.0266628	0.257962	0.588444	TMB	POST-TREATMENT
CD44	286.632	-1.51917	1.51917	1	0	0.6984	-2.17522	0.0296137	0.267821	0.572155	TMB	POST-TREATMENT
MTOR	2390.14	-0.738527	0.738527	0	0	0.340854	-2.1667	0.0302579	0.267821	0.572155	TMB	POST-TREATMENT
PGF	563.908	-1.02208	1.02208	0	0	0.470168	-2.17385	0.029716	0.267821	0.572155	TMB	POST-TREATMENT
TNFRSF17	302.033	1.31831	1.31831	0	0	0.609145	2.16419	0.0304499	0.267821	0.572155	TMB	POST-TREATMENT
GADD45GIP1	5941.89	-0.610671	0.610671	0	0	0.28667	-2.13022	0.0331534	0.278921	0.554519	TMB	POST-TREATMENT
IKZF1	17414.1	0.763373	0.763373	0	0	0.356981	2.13842	0.0324829	0.278921	0.554519	TMB	POST-TREATMENT
CD27	991.311	0.923769	0.923769	0	0	0.438318	2.10753	0.0350716	0.288781	0.539431	TMB	POST-TREATMENT
CDK1	630.75	-1.18159	1.18159	0	0	0.565808	-2.08833	0.0367684	0.296446	0.528055	TMB	POST-TREATMENT
BCL6	9336.83	-0.590554	0.590554	0	0	0.287308	-2.05547	0.0398334	0.308928	0.510143	TMB	POST-TREATMENT
MMP2	50200.2	0.651306	0.651306	0	0	0.316992	2.05465	0.0399132	0.308928	0.510143	TMB	POST-TREATMENT
CCL17	836.922	-0.904638	0.904638	0	0	0.445542	-2.03042	0.0423135	0.321085	0.49338	TMB	POST-TREATMENT
FCRLA	411.796	1.52171	1.52171	1	0	0.777512	1.95715	0.0503294	0.360694	0.442861	TMB	POST-TREATMENT
IFIT2	1797.37	-0.635454	0.635454	0	0	0.323339	-1.96529	0.0493807	0.360694	0.442861	TMB	POST-TREATMENT
KRT7	8589.77	-1.10493	1.10493	0	0	0.562618	-1.96391	0.0495405	0.360694	0.442861	TMB	POST-TREATMENT
FCGR3A	4246.41	-0.606609	0.606609	0	0	0.318937	-1.90197	0.0571746	0.381493	0.418514	TMB	POST-TREATMENT
HLA-G	24.3646	-2.40257	2.40257	1	1	1.26154	-1.90447	0.0568487	0.381493	0.418514	TMB	POST-TREATMENT
ITGB7	1073.48	0.806875	0.806875	0	0	0.422126	1.91145	0.0559463	0.381493	0.418514	TMB	POST-TREATMENT
TFRC	7040.72	-0.760183	0.760183	0	0	0.399157	-1.90447	0.0568493	0.381493	0.418514	TMB	POST-TREATMENT
SLAMF7	9224.09	0.780764	0.780764	0	0	0.41795	1.86808	0.0617512	0.405046	0.392496	TMB	POST-TREATMENT
CIITA	9129.53	0.543337	0.543337	0	0	0.293711	1.8499	0.0643277	0.408112	0.389221	TMB	POST-TREATMENT
POU2AF1	3370.63	0.829105	0.829105	0	0	0.4478	1.85151	0.0640967	0.408112	0.389221	TMB	POST-TREATMENT
CD8B	1284.56	-0.800135	0.800135	0	0	0.434832	-1.8401	0.0657532	0.410057	0.387156	TMB	POST-TREATMENT
CXCL8	9628.64	-1.26633	1.26633	0	0	0.690727	-1.83333	0.0667534	0.410057	0.387156	TMB	POST-TREATMENT
CD79A	7581.61	0.924047	0.924047	0	0	0.508014	1.81894	0.0689203	0.410341	0.386855	TMB	POST-TREATMENT
LILRB2	846.45	-0.568346	0.568346	0	0	0.312031	-1.82144	0.06854	0.410341	0.386855	TMB	POST-TREATMENT
ABCF1	6441.37	-0.619455	0.619455	0	0	0.349926	-1.77025	0.0766862	0.44966	0.347116	TMB	POST-TREATMENT
CD48	1492.67	0.540917	0.540917	0	0	0.306942	1.76228	0.0780221	0.450665	0.346146	TMB	POST-TREATMENT
CCR7	942.949	0.613746	0.613746	0	0	0.352433	1.74145	0.0816043	0.45634	0.340712	TMB	POST-TREATMENT
CDKN3	658.185	-1.54513	1.54513	1	0	0.889892	-1.73632	0.0825078	0.45634	0.340712	TMB	POST-TREATMENT
HLA-DOB	1791.19	0.83286	0.83286	0	0	0.481564	1.72949	0.0837212	0.45634	0.340712	TMB	POST-TREATMENT
PRDM1	4527.47	0.524603	0.524603	0	0	0.303302	1.72964	0.083695	0.45634	0.340712	TMB	POST-TREATMENT
CRTAM	372.765	0.970678	0.970678	0	0	0.567311	1.71102	0.0870778	0.464177	0.333317	TMB	POST-TREATMENT
CXCL11	401.348	-0.94815	0.94815	0	0	0.554985	-1.70842	0.0875579	0.464177	0.333317	TMB	POST-TREATMENT
HLA-DMA	13006.5	0.376634	0.376634	0	0	0.223377	1.6861	0.0917772	0.47997	0.318786	TMB	POST-TREATMENT
FOXO1	7600.58	0.458938	0.458938	0	0	0.274023	1.67482	0.0939703	0.484887	0.31436	TMB	POST-TREATMENT
CD6	923.422	0.503123	0.503123	0	0	0.305289	1.64803	0.0993474	0.493281	0.306905	TMB	POST-TREATMENT
HLA-DPB1	37137.2	0.411483	0.411483	0	0	0.249737	1.64767	0.0994211	0.493281	0.306905	TMB	POST-TREATMENT
KLRK1	3581.53	0.586768	0.586768	0	0	0.355471	1.65067	0.0988051	0.493281	0.306905	TMB	POST-TREATMENT
CEACAM1	315.858	-1.15607	1.15607	0	0	0.708944	-1.63069	0.102955	0.499573	0.301401	TMB	POST-TREATMENT
STAT3	17410.5	-0.406743	0.406743	0	0	0.249659	-1.6292	0.103271	0.499573	0.301401	TMB	POST-TREATMENT
CMKLR1	7.50119	-3.12131	3.12131	1	1	1.9661	-1.58756	0.112386	0.501861	0.299417	TMB	POST-TREATMENT
CXCL13	3828.59	0.981088	0.981088	0	0	0.605563	1.62013	0.105205	0.501861	0.299417	TMB	POST-TREATMENT
ID2	13978.2	-0.66	0.66	0	0	0.415592	-1.5881	0.112265	0.501861	0.299417	TMB	POST-TREATMENT
IL10RA	5074.96	0.353579	0.353579	0	0	0.222355	1.59016	0.1118	0.501861	0.299417	TMB	POST-TREATMENT
KLRB1	2149.56	0.590532	0.590532	0	0	0.368075	1.60438	0.10863	0.501861	0.299417	TMB	POST-TREATMENT
STAT1	9789.36	-0.580245	0.580245	0	0	0.360529	-1.60943	0.107523	0.501861	0.299417	TMB	POST-TREATMENT
TNFSF4	87.2987	0.709175	0.709175	0	0	0.447249	1.58564	0.112821	0.501861	0.299417	TMB	POST-TREATMENT
MAPK1	5562.91	-0.399226	0.399226	0	0	0.255733	-1.5611	0.1185	0.521129	0.283055	TMB	POST-TREATMENT
EFNA4	429.744	-0.801788	0.801788	0	0	0.523276	-1.53225	0.125461	0.53525	0.271443	TMB	POST-TREATMENT
LAG3	503.829	-0.624585	0.624585	0	0	0.407372	-1.5332	0.125226	0.53525	0.271443	TMB	POST-TREATMENT
MAGEA3	9.25102	-5.72665	5.72665	1	1	3.74449	-1.52935	0.126177	0.53525	0.271443	TMB	POST-TREATMENT
PIK3CA	1999.29	-0.369294	0.369294	0	0	0.24215	-1.52506	0.127243	0.53525	0.271443	TMB	POST-TREATMENT
BST2	16738.6	-0.308542	0.308542	0	0	0.203794	-1.51398	0.13003	0.537932	0.269273	TMB	POST-TREATMENT
NCR3	180.824	1.10687	1.10687	0	0	0.732299	1.5115	0.130661	0.537932	0.269273	TMB	POST-TREATMENT
JCHAIN	55089.3	0.760499	0.760499	0	0	0.508131	1.49666	0.134482	0.547839	0.261347	TMB	POST-TREATMENT
CD38	1564.16	0.696118	0.696118	0	0	0.482187	1.44367	0.148832	0.554506	0.256094	TMB	POST-TREATMENT
CD47	9847.64	-0.369372	0.369372	0	0	0.256036	-1.44265	0.149118	0.554506	0.256094	TMB	POST-TREATMENT
CX3CR1	167.275	-0.674157	0.674157	0	0	0.458455	-1.4705	0.141427	0.554506	0.256094	TMB	POST-TREATMENT
CXCL1	8016.16	-0.871357	0.871357	0	0	0.602649	-1.44588	0.148212	0.554506	0.256094	TMB	POST-TREATMENT
EBI3	284.07	0.74029	0.74029	0	0	0.5146	1.43857	0.150272	0.554506	0.256094	TMB	POST-TREATMENT
FCGR3B	769.199	-0.974812	0.974812	0	0	0.67393	-1.44646	0.148049	0.554506	0.256094	TMB	POST-TREATMENT
FUT4	4041.97	0.744573	0.744573	0	0	0.503269	1.47947	0.139014	0.554506	0.256094	TMB	POST-TREATMENT
HIF1A	7552.82	-0.53275	0.53275	0	0	0.364424	-1.4619	0.143769	0.554506	0.256094	TMB	POST-TREATMENT
NOTCH3	7102.86	-0.477297	0.477297	0	0	0.328974	-1.45086	0.146817	0.554506	0.256094	TMB	POST-TREATMENT
RPS6	88376.9	-0.422297	0.422297	0	0	0.293679	-1.43795	0.150447	0.554506	0.256094	TMB	POST-TREATMENT
CD2	4105.75	0.436074	0.436074	0	0	0.311438	1.4002	0.161455	0.55847	0.253	TMB	POST-TREATMENT
CD40	1006.9	-0.490217	0.490217	0	0	0.34756	-1.41045	0.158406	0.55847	0.253	TMB	POST-TREATMENT
CD79B	575.724	0.567283	0.567283	0	0	0.406701	1.39484	0.163064	0.55847	0.253	TMB	POST-TREATMENT
CX3CL1	1643.52	-0.694441	0.694441	0	0	0.497171	-1.39679	0.162478	0.55847	0.253	TMB	POST-TREATMENT
CXCR6	589.963	0.755022	0.755022	0	0	0.541301	1.39483	0.163067	0.55847	0.253	TMB	POST-TREATMENT
IFI35	1498.12	-0.420622	0.420622	0	0	0.296594	-1.41818	0.156139	0.55847	0.253	TMB	POST-TREATMENT
NCAM1	477.605	0.848774	0.848774	0	0	0.602816	1.40801	0.159127	0.55847	0.253	TMB	POST-TREATMENT
PTEN	13664.3	-0.590624	0.590624	0	0	0.416478	-1.41814	0.15615	0.55847	0.253	TMB	POST-TREATMENT
CCR4	643.047	0.49147	0.49147	0	0	0.356809	1.3774	0.168388	0.566663	0.246676	TMB	POST-TREATMENT
FCER1G	14842.4	-0.348673	0.348673	0	0	0.252941	-1.37848	0.168056	0.566663	0.246676	TMB	POST-TREATMENT
CD63	36771.2	-0.372398	0.372398	0	0	0.272189	-1.36816	0.171263	0.571367	0.243085	TMB	POST-TREATMENT
IKZF4	119.385	-1.18736	1.18736	0	0	0.871951	-1.36173	0.173284	0.573172	0.241715	TMB	POST-TREATMENT
TIGIT	528.976	0.772282	0.772282	0	0	0.572779	1.34831	0.177559	0.582335	0.234827	TMB	POST-TREATMENT
GZMH	974.83	0.434608	0.434608	0	0	0.32603	1.33303	0.182521	0.593578	0.226522	TMB	POST-TREATMENT
CD28	781.18	0.549899	0.549899	0	0	0.415297	1.32411	0.185466	0.598129	0.223205	TMB	POST-TREATMENT
LAMP3	3354.51	-0.665843	0.665843	0	0	0.50879	-1.30868	0.190643	0.609742	0.214854	TMB	POST-TREATMENT
BRCA2	510.23	-0.796216	0.796216	0	0	0.615015	-1.29463	0.195448	0.612302	0.213035	TMB	POST-TREATMENT
CCR5	2484.58	0.378513	0.378513	0	0	0.295382	1.28144	0.200041	0.612302	0.213035	TMB	POST-TREATMENT
CD19	556.369	0.792178	0.792178	0	0	0.628154	1.26112	0.207265	0.612302	0.213035	TMB	POST-TREATMENT
CD86	929.437	-0.388845	0.388845	0	0	0.307251	-1.26556	0.205671	0.612302	0.213035	TMB	POST-TREATMENT
CD8A	3671.62	0.423099	0.423099	0	0	0.327649	1.29132	0.196594	0.612302	0.213035	TMB	POST-TREATMENT
CSF2RB	6284.34	0.307961	0.307961	0	0	0.24289	1.2679	0.204832	0.612302	0.213035	TMB	POST-TREATMENT
CXCR4	22107.2	0.429245	0.429245	0	0	0.337616	1.2714	0.203587	0.612302	0.213035	TMB	POST-TREATMENT
EGFR	5677.91	-0.413007	0.413007	0	0	0.320598	-1.28824	0.197662	0.612302	0.213035	TMB	POST-TREATMENT
ID3	1622.64	0.562257	0.562257	0	0	0.445286	1.26269	0.206701	0.612302	0.213035	TMB	POST-TREATMENT
ITGAL	2403.47	0.554045	0.554045	0	0	0.437892	1.26526	0.20578	0.612302	0.213035	TMB	POST-TREATMENT
XAGE1B	661.053	-0.964733	0.964733	0	0	0.769581	-1.25358	0.209994	0.615664	0.210656	TMB	POST-TREATMENT
CCL18	9640.6	-0.509469	0.509469	0	0	0.413617	-1.23174	0.218045	0.615938	0.210463	TMB	POST-TREATMENT
CD226	1107.69	0.532502	0.532502	0	0	0.431887	1.23297	0.217588	0.615938	0.210463	TMB	POST-TREATMENT
CSF1R	1808.73	-0.286029	0.286029	0	0	0.229443	-1.24662	0.212536	0.615938	0.210463	TMB	POST-TREATMENT
ENTPD1	2589.53	0.31776	0.31776	0	0	0.25768	1.23316	0.217517	0.615938	0.210463	TMB	POST-TREATMENT
VCAM1	2776.23	0.632995	0.632995	0	0	0.508739	1.24424	0.21341	0.615938	0.210463	TMB	POST-TREATMENT
GUSB	4535.55	-0.294443	0.294443	0	0	0.240612	-1.22372	0.221057	0.619921	0.207663	TMB	POST-TREATMENT
IL2RG	3127.15	0.303404	0.303404	0	0	0.249902	1.21409	0.224712	0.625636	0.203678	TMB	POST-TREATMENT
IDO1	1110.12	-0.586313	0.586313	0	0	0.486507	-1.20515	0.228146	0.630659	0.200205	TMB	POST-TREATMENT
IKZF2	254.002	-0.502462	0.502462	0	0	0.424202	-1.18449	0.23622	0.648348	0.188192	TMB	POST-TREATMENT
MMP9	4763.99	0.631522	0.631522	0	0	0.539674	1.17019	0.241924	0.65017	0.186973	TMB	POST-TREATMENT
NFKBIA	21399.8	-0.39591	0.39591	0	0	0.337894	-1.1717	0.241317	0.65017	0.186973	TMB	POST-TREATMENT
PTK7	5612.68	-0.450207	0.450207	0	0	0.384265	-1.17161	0.241355	0.65017	0.186973	TMB	POST-TREATMENT
STAT6	9185.72	-0.33693	0.33693	0	0	0.29496	-1.14229	0.253332	0.676135	0.169967	TMB	POST-TREATMENT
AKT1	4370.51	-0.266091	0.266091	0	0	0.237112	-1.12222	0.26177	0.677775	0.168914	TMB	POST-TREATMENT
CCL22	438.966	-0.506517	0.506517	0	0	0.453899	-1.11592	0.264455	0.677775	0.168914	TMB	POST-TREATMENT
CCNB2	332.381	-0.992422	0.992422	0	0	0.873682	-1.13591	0.255995	0.677775	0.168914	TMB	POST-TREATMENT
HLA-F-AS1	25.7079	1.01798	1.01798	0	0	0.90747	1.12178	0.261956	0.677775	0.168914	TMB	POST-TREATMENT
MAPK14	3209.97	-0.188692	0.188692	0	0	0.169071	-1.11605	0.264401	0.677775	0.168914	TMB	POST-TREATMENT
TLR8	458.423	-0.620841	0.620841	0	0	0.551138	-1.12647	0.259966	0.677775	0.168914	TMB	POST-TREATMENT
FCGR2B	480.573	0.576738	0.576738	0	0	0.529326	1.08957	0.275903	0.684452	0.164657	TMB	POST-TREATMENT
ICOSLG	1520.91	-0.355534	0.355534	0	0	0.326181	-1.08999	0.275718	0.684452	0.164657	TMB	POST-TREATMENT
IFNA17	2298.94	0.804159	0.804159	0	0	0.732318	1.0981	0.27216	0.684452	0.164657	TMB	POST-TREATMENT
MS4A1	682.182	0.614472	0.614472	0	0	0.557041	1.1031	0.269984	0.684452	0.164657	TMB	POST-TREATMENT
RORC	1195.56	-0.655896	0.655896	0	0	0.598126	-1.09659	0.272822	0.684452	0.164657	TMB	POST-TREATMENT
BCL2	1344.77	-0.333456	0.333456	0	0	0.310994	-1.07223	0.283618	0.692947	0.1593	TMB	POST-TREATMENT
IL6	1823.34	0.671754	0.671754	0	0	0.627475	1.07057	0.284364	0.692947	0.1593	TMB	POST-TREATMENT
VEGFA	16897.3	-0.454126	0.454126	0	0	0.424488	-1.06982	0.284699	0.692947	0.1593	TMB	POST-TREATMENT
CCL2	21594.5	0.701376	0.701376	0	0	0.668945	1.04848	0.294417	0.702812	0.153161	TMB	POST-TREATMENT
CD69	2579.03	0.323821	0.323821	0	0	0.306715	1.05577	0.291074	0.702812	0.153161	TMB	POST-TREATMENT
EGR2	3704.02	0.385354	0.385354	0	0	0.366161	1.05242	0.292608	0.702812	0.153161	TMB	POST-TREATMENT
IRF4	1256.18	0.634091	0.634091	0	0	0.606809	1.04496	0.296042	0.702812	0.153161	TMB	POST-TREATMENT
TLR9	373.078	0.530918	0.530918	0	0	0.509962	1.04109	0.297833	0.702812	0.153161	TMB	POST-TREATMENT
MAGEA12	0.802165	-3.89167	3.89167	1	1	3.7634	-1.03408	0.301097	0.706209	0.151067	TMB	POST-TREATMENT
GZMK	780.596	0.52548	0.52548	0	0	0.510892	1.02856	0.303688	0.707982	0.149978	TMB	POST-TREATMENT
IL17A	1.46385	-3.85657	3.85657	1	1	3.76366	-1.02469	0.305512	0.707982	0.149978	TMB	POST-TREATMENT
GPR18	174.207	0.706097	0.706097	0	0	0.694312	1.01697	0.309166	0.710283	0.148569	TMB	POST-TREATMENT
NCF1	4666.32	0.367638	0.367638	0	0	0.363588	1.01114	0.311949	0.710283	0.148569	TMB	POST-TREATMENT
TNFRSF9	533.193	0.663343	0.663343	0	0	0.656117	1.01101	0.31201	0.710283	0.148569	TMB	POST-TREATMENT
CD33	1101.92	-0.34262	0.34262	0	0	0.342619	-1	0.317308	0.718119	0.143804	TMB	POST-TREATMENT
LCK	7.55775	1.30797	1.30797	0	0	1.31582	0.994031	0.320208	0.720468	0.142385	TMB	POST-TREATMENT
PDCD1LG2	885.728	-0.313341	0.313341	0	0	0.317636	-0.98648	0.323898	0.724558	0.139927	TMB	POST-TREATMENT
CD3D	2929.68	0.33631	0.33631	0	0	0.348502	0.965016	0.334537	0.730377	0.136453	TMB	POST-TREATMENT
CDKN2A	878.751	-0.583667	0.583667	0	0	0.60658	-0.962226	0.335936	0.730377	0.136453	TMB	POST-TREATMENT
EOMES	464.101	0.445146	0.445146	0	0	0.461611	0.96433	0.33488	0.730377	0.136453	TMB	POST-TREATMENT
LY9	160.834	0.84598	0.84598	0	0	0.86641	0.97642	0.328857	0.730377	0.136453	TMB	POST-TREATMENT
SKAP2	2677.28	-0.32911	0.32911	0	0	0.341097	-0.964855	0.334617	0.730377	0.136453	TMB	POST-TREATMENT
TBX21	408.065	0.381392	0.381392	0	0	0.400706	0.951802	0.341198	0.737673	0.132136	TMB	POST-TREATMENT
CXCR5	252.342	0.742272	0.742272	0	0	0.807183	0.919584	0.35779	0.742693	0.129191	TMB	POST-TREATMENT
EIF2AK2	5223.02	-0.2099	0.2099	0	0	0.228514	-0.918545	0.358334	0.742693	0.129191	TMB	POST-TREATMENT
KRT5	951.399	-0.636648	0.636648	0	0	0.677653	-0.93949	0.347479	0.742693	0.129191	TMB	POST-TREATMENT
SELL	442.276	0.307848	0.307848	0	0	0.33204	0.92714	0.353854	0.742693	0.129191	TMB	POST-TREATMENT
SNAI2	1744.03	0.404116	0.404116	0	0	0.439364	0.919776	0.35769	0.742693	0.129191	TMB	POST-TREATMENT
TAGAP	2184.84	0.304646	0.304646	0	0	0.332034	0.917516	0.358872	0.742693	0.129191	TMB	POST-TREATMENT
TAP1	6050.23	-0.237712	0.237712	0	0	0.253997	-0.935885	0.349332	0.742693	0.129191	TMB	POST-TREATMENT
TNFRSF14	2938.79	0.216261	0.216261	0	0	0.230599	0.937822	0.348336	0.742693	0.129191	TMB	POST-TREATMENT
AIF1	7058.15	-0.267234	0.267234	0	0	0.29793	-0.896967	0.369736	0.744844	0.127934	TMB	POST-TREATMENT
CD53	544.4	0.704514	0.704514	0	0	0.789127	0.892776	0.371977	0.744844	0.127934	TMB	POST-TREATMENT
CEACAM8	32.2639	1.28011	1.28011	0	0	1.43601	0.891437	0.372695	0.744844	0.127934	TMB	POST-TREATMENT
ITGB1	36382.6	-0.282107	0.282107	0	0	0.31692	-0.890152	0.373385	0.744844	0.127934	TMB	POST-TREATMENT
NTN3	64.3997	0.788017	0.788017	0	0	0.877412	0.898115	0.369124	0.744844	0.127934	TMB	POST-TREATMENT
PDCD1	492.889	0.333893	0.333893	0	0	0.371889	0.897829	0.369277	0.744844	0.127934	TMB	POST-TREATMENT
PTPN7	1887.52	0.400747	0.400747	0	0	0.449219	0.892096	0.372342	0.744844	0.127934	TMB	POST-TREATMENT
CD37	6924.05	0.290569	0.290569	0	0	0.327827	0.886349	0.37543	0.745084	0.127795	TMB	POST-TREATMENT
CCL20	2203.2	-0.636704	0.636704	0	0	0.744159	-0.855601	0.392218	0.747647	0.126304	TMB	POST-TREATMENT
CD209	1111.9	-0.496463	0.496463	0	0	0.585947	-0.847283	0.396838	0.747647	0.126304	TMB	POST-TREATMENT
CD244	242.163	0.516644	0.516644	0	0	0.626492	0.824662	0.409564	0.747647	0.126304	TMB	POST-TREATMENT
FAS	2878.11	0.299722	0.299722	0	0	0.351806	0.851952	0.394241	0.747647	0.126304	TMB	POST-TREATMENT
HLA-DOA	2111.78	0.230097	0.230097	0	0	0.263416	0.87351	0.382385	0.747647	0.126304	TMB	POST-TREATMENT
HLA-DRA	106895	0.204743	0.204743	0	0	0.244962	0.835816	0.403258	0.747647	0.126304	TMB	POST-TREATMENT
IFITM1	16868.7	-0.217752	0.217752	0	0	0.251572	-0.865564	0.386729	0.747647	0.126304	TMB	POST-TREATMENT
IGF1R	11366.3	-0.235513	0.235513	0	0	0.285528	-0.824835	0.409465	0.747647	0.126304	TMB	POST-TREATMENT
IRF9	6398.91	0.145302	0.145302	0	0	0.1749	0.830774	0.406102	0.747647	0.126304	TMB	POST-TREATMENT
ITGA1	7050.37	0.290821	0.290821	0	0	0.34485	0.843326	0.399046	0.747647	0.126304	TMB	POST-TREATMENT
KIR2DL3	27.021	1.07193	1.07193	0	0	1.23161	0.870351	0.384109	0.747647	0.126304	TMB	POST-TREATMENT
LAPTM5	19941.4	0.241187	0.241187	0	0	0.284093	0.848971	0.395897	0.747647	0.126304	TMB	POST-TREATMENT
NFATC1	479.335	0.35717	0.35717	0	0	0.426232	0.837971	0.402047	0.747647	0.126304	TMB	POST-TREATMENT
PECAM1	8593.25	0.537495	0.537495	0	0	0.631036	0.851766	0.394344	0.747647	0.126304	TMB	POST-TREATMENT
POLR2A	13793.7	-0.321374	0.321374	0	0	0.38963	-0.824818	0.409475	0.747647	0.126304	TMB	POST-TREATMENT
PRF1	825.5	-0.27991	0.27991	0	0	0.321881	-0.869608	0.384514	0.747647	0.126304	TMB	POST-TREATMENT
PSMB9	2580.52	-0.245419	0.245419	0	0	0.284873	-0.861503	0.388961	0.747647	0.126304	TMB	POST-TREATMENT
BTLA	612.261	0.390779	0.390779	0	0	0.482208	0.810395	0.417713	0.748306	0.125921	TMB	POST-TREATMENT
CCL3	1255.94	0.378922	0.378922	0	0	0.472956	0.801178	0.423029	0.748306	0.125921	TMB	POST-TREATMENT
CD276	929.824	-0.326514	0.326514	0	0	0.407533	-0.801196	0.423018	0.748306	0.125921	TMB	POST-TREATMENT
ICAM1	14617.5	-0.40981	0.40981	0	0	0.501762	-0.816742	0.414076	0.748306	0.125921	TMB	POST-TREATMENT
LYZ	78856	0.300325	0.300325	0	0	0.366563	0.819301	0.412615	0.748306	0.125921	TMB	POST-TREATMENT
NCR1	67.0563	-0.572943	0.572943	0	0	0.715791	-0.800433	0.42346	0.748306	0.125921	TMB	POST-TREATMENT
PTGS2	2735.24	0.379724	0.379724	0	0	0.473429	0.802072	0.422512	0.748306	0.125921	TMB	POST-TREATMENT
CD22	1241.34	0.427638	0.427638	0	0	0.545922	0.783331	0.433433	0.762448	0.11779	TMB	POST-TREATMENT
CD3E	6032.18	0.187537	0.187537	0	0	0.244462	0.767144	0.442996	0.768786	0.114194	TMB	POST-TREATMENT
IL12A	161.768	0.578438	0.578438	0	0	0.750017	0.771234	0.440568	0.768786	0.114194	TMB	POST-TREATMENT
TNFSF13B	3535.83	0.263542	0.263542	0	0	0.343063	0.768205	0.442366	0.768786	0.114194	TMB	POST-TREATMENT
CD83	3105.12	0.285561	0.285561	0	0	0.37412	0.763288	0.445292	0.769321	0.113892	TMB	POST-TREATMENT
AXL	1933.67	0.238552	0.238552	0	0	0.314856	0.757654	0.448658	0.771692	0.112556	TMB	POST-TREATMENT
LRP1	14503.2	0.17321	0.17321	0	0	0.233123	0.742999	0.457482	0.776516	0.10985	TMB	POST-TREATMENT
PVR	3406.31	-0.310929	0.310929	0	0	0.418338	-0.743248	0.457332	0.776516	0.10985	TMB	POST-TREATMENT
TNFSF14	117.305	1.09229	1.09229	0	0	1.45776	0.749291	0.453682	0.776516	0.10985	TMB	POST-TREATMENT
DMBT1	6362.35	-0.52183	0.52183	0	0	0.722015	-0.722742	0.469839	0.780376	0.107696	TMB	POST-TREATMENT
IGSF6	1634.17	0.255439	0.255439	0	0	0.35009	0.729638	0.465612	0.780376	0.107696	TMB	POST-TREATMENT
ITGAM	2489.9	-0.239969	0.239969	0	0	0.329788	-0.727645	0.466831	0.780376	0.107696	TMB	POST-TREATMENT
ITGAX	2661.4	0.251303	0.251303	0	0	0.346339	0.725598	0.468085	0.780376	0.107696	TMB	POST-TREATMENT
PTPRC	2784.74	0.242881	0.242881	0	0	0.333105	0.729143	0.465914	0.780376	0.107696	TMB	POST-TREATMENT
TNFAIP8	1238.62	0.207794	0.207794	0	0	0.289488	0.717798	0.472882	0.782074	0.106752	TMB	POST-TREATMENT
IL2	10.0127	0.956463	0.956463	0	0	1.35085	0.708047	0.478916	0.788683	0.103098	TMB	POST-TREATMENT
CBLB	4726.74	0.258051	0.258051	0	0	0.374518	0.689021	0.49081	0.798957	0.0974768	TMB	POST-TREATMENT
CYBB	9099.03	-0.170589	0.170589	0	0	0.246849	-0.691066	0.489524	0.798957	0.0974768	TMB	POST-TREATMENT
SH2D1A	523.738	0.269521	0.269521	0	0	0.39165	0.688166	0.491348	0.798957	0.0974768	TMB	POST-TREATMENT
ADGRE5	11447.7	0.177841	0.177841	0	0	0.282316	0.629938	0.528735	0.816023	0.0882974	TMB	POST-TREATMENT
CD247	1029.43	0.242428	0.242428	0	0	0.378685	0.640184	0.522053	0.816023	0.0882974	TMB	POST-TREATMENT
CTLA4	378.849	0.355591	0.355591	0	0	0.535802	0.663661	0.506907	0.816023	0.0882974	TMB	POST-TREATMENT
CXCL10	1879.04	-0.248172	0.248172	0	0	0.389087	-0.637832	0.523583	0.816023	0.0882974	TMB	POST-TREATMENT
FCGR1A	1013.61	-0.312104	0.312104	0	0	0.493255	-0.632744	0.526901	0.816023	0.0882974	TMB	POST-TREATMENT
IL1B	1092.28	0.335795	0.335795	0	0	0.531168	0.632181	0.527268	0.816023	0.0882974	TMB	POST-TREATMENT
ITK	1370.65	0.2943	0.2943	0	0	0.456574	0.644584	0.519197	0.816023	0.0882974	TMB	POST-TREATMENT
KLF2	11453.8	-0.255262	0.255262	0	0	0.390064	-0.654409	0.512848	0.816023	0.0882974	TMB	POST-TREATMENT
KLRG1	789.044	0.33826	0.33826	0	0	0.540416	0.625925	0.531364	0.816023	0.0882974	TMB	POST-TREATMENT
LEXM	25.0767	-1.29526	1.29526	0	0	1.98373	-0.652944	0.513792	0.816023	0.0882974	TMB	POST-TREATMENT
NKG7	5922.04	0.191303	0.191303	0	0	0.300201	0.637249	0.523962	0.816023	0.0882974	TMB	POST-TREATMENT
SNAI1	590.8	0.325676	0.325676	0	0	0.50649	0.643005	0.520221	0.816023	0.0882974	TMB	POST-TREATMENT
STAT5A	1716.14	0.210397	0.210397	0	0	0.316833	0.664063	0.50665	0.816023	0.0882974	TMB	POST-TREATMENT
TCF7	1219.82	0.217121	0.217121	0	0	0.346548	0.626524	0.530971	0.816023	0.0882974	TMB	POST-TREATMENT
IRF1	4184.21	-0.166493	0.166493	0	0	0.271867	-0.612406	0.540269	0.823166	0.0845128	TMB	POST-TREATMENT
TRIM29	399.16	-0.465356	0.465356	0	0	0.757086	-0.614668	0.538774	0.823166	0.0845128	TMB	POST-TREATMENT
CD4	4234.96	0.144731	0.144731	0	0	0.238918	0.605775	0.544664	0.825341	0.0833665	TMB	POST-TREATMENT
IL1A	96.805	-0.642398	0.642398	0	0	1.06389	-0.603822	0.545962	0.825341	0.0833665	TMB	POST-TREATMENT
CA4	2190.89	-0.474431	0.474431	0	0	0.794084	-0.597456	0.550203	0.828515	0.0816995	TMB	POST-TREATMENT
SAMHD1	7213.88	-0.174776	0.174776	0	0	0.296358	-0.589746	0.555361	0.833042	0.0793332	TMB	POST-TREATMENT
CD160	54.774	-0.605266	0.605266	0	0	1.03931	-0.582373	0.560315	0.834008	0.0788298	TMB	POST-TREATMENT
IL13	31.6693	0.851643	0.851643	0	0	1.45485	0.585382	0.558291	0.834008	0.0788298	TMB	POST-TREATMENT
NT5E	844.642	-0.172158	0.172158	0	0	0.298596	-0.576561	0.564236	0.836621	0.0774712	TMB	POST-TREATMENT
ZEB1	2999.05	0.207421	0.207421	0	0	0.361758	0.573369	0.566395	0.836621	0.0774712	TMB	POST-TREATMENT
IFNB1	1365.78	0.422499	0.422499	0	0	0.749877	0.563424	0.573146	0.843374	0.0739796	TMB	POST-TREATMENT
C1QA	22078.5	-0.14007	0.14007	0	0	0.250043	-0.560186	0.575352	0.843414	0.0739591	TMB	POST-TREATMENT
ICOS	170.624	0.37133	0.37133	0	0	0.674992	0.550125	0.582233	0.848484	0.0713562	TMB	POST-TREATMENT
IL15	419.043	0.218933	0.218933	0	0	0.398988	0.548722	0.583196	0.848484	0.0713562	TMB	POST-TREATMENT
MYC	6739.25	-0.243813	0.243813	0	0	0.447491	-0.544845	0.58586	0.849168	0.0710064	TMB	POST-TREATMENT
CCL4	9069.74	0.179423	0.179423	0	0	0.340905	0.526312	0.598671	0.851786	0.0696695	TMB	POST-TREATMENT
GZMA	2215.91	0.215144	0.215144	0	0	0.407177	0.52838	0.597236	0.851786	0.0696695	TMB	POST-TREATMENT
IL2RB	1752.76	-0.187088	0.187088	0	0	0.355024	-0.526974	0.598211	0.851786	0.0696695	TMB	POST-TREATMENT
MAD2L1	845.183	-0.317528	0.317528	0	0	0.590183	-0.538016	0.590566	0.851786	0.0696695	TMB	POST-TREATMENT
TWIST1	471.685	0.338262	0.338262	0	0	0.639709	0.528776	0.596961	0.851786	0.0696695	TMB	POST-TREATMENT
HAVCR2	2979.79	0.121914	0.121914	0	0	0.23473	0.519378	0.603497	0.855507	0.0677766	TMB	POST-TREATMENT
MAGEC2	0.221682	1.94348	1.94348	1	0	3.79523	0.512085	0.608592	0.858668	0.0661747	TMB	POST-TREATMENT
TDO2	551.236	0.245806	0.245806	0	0	0.482126	0.509838	0.610165	0.858668	0.0661747	TMB	POST-TREATMENT
TNFSF9	124.71	-0.32352	0.32352	0	0	0.638694	-0.506534	0.612482	0.858806	0.0661047	TMB	POST-TREATMENT
B3GAT1	81.3703	0.395055	0.395055	0	0	0.846475	0.466707	0.64071	0.866625	0.0621688	TMB	POST-TREATMENT
C10orf54	3465.44	0.109645	0.109645	0	0	0.235506	0.465573	0.641521	0.866625	0.0621688	TMB	POST-TREATMENT
CD68	27848.4	0.130441	0.130441	0	0	0.277546	0.469981	0.638369	0.866625	0.0621688	TMB	POST-TREATMENT
CD80	1898.61	0.230366	0.230366	0	0	0.496543	0.46394	0.642691	0.866625	0.0621688	TMB	POST-TREATMENT
CTAG2	2.63136	-1.36139	1.36139	0	0	2.82343	-0.482177	0.62968	0.866625	0.0621688	TMB	POST-TREATMENT
GBP1	8223.47	0.139165	0.139165	0	0	0.283631	0.490655	0.623671	0.866625	0.0621688	TMB	POST-TREATMENT
HLA-DPA1	90978.3	0.246209	0.246209	0	0	0.504481	0.488044	0.625518	0.866625	0.0621688	TMB	POST-TREATMENT
IL21	11.9917	1.08668	1.08668	0	0	2.29863	0.47275	0.636392	0.866625	0.0621688	TMB	POST-TREATMENT
ISG20	2436.08	-0.139968	0.139968	0	0	0.301463	-0.464295	0.642436	0.866625	0.0621688	TMB	POST-TREATMENT
PMEL	43.5569	-0.568754	0.568754	0	0	1.21169	-0.469388	0.638793	0.866625	0.0621688	TMB	POST-TREATMENT
TNFSF18	57.2703	0.498514	0.498514	0	0	1.0235	0.487066	0.626212	0.866625	0.0621688	TMB	POST-TREATMENT
ARG1	22.8575	0.852846	0.852846	0	0	1.94049	0.439499	0.6603	0.86917	0.0608952	TMB	POST-TREATMENT
CD1C	1621.22	0.196959	0.196959	0	0	0.434687	0.453105	0.650473	0.86917	0.0608952	TMB	POST-TREATMENT
CD3G	3241.99	0.146662	0.146662	0	0	0.333169	0.440204	0.65979	0.86917	0.0608952	TMB	POST-TREATMENT
CD74	16138.2	0.139707	0.139707	0	0	0.306046	0.456491	0.648037	0.86917	0.0608952	TMB	POST-TREATMENT
MAGEA4	0.155059	-1.68528	1.68528	1	0	3.79446	-0.444142	0.65694	0.86917	0.0608952	TMB	POST-TREATMENT
MELK	432.574	-0.369417	0.369417	0	0	0.838163	-0.440747	0.659397	0.86917	0.0608952	TMB	POST-TREATMENT
NECTIN2	409.558	-0.150427	0.150427	0	0	0.335122	-0.448871	0.653524	0.86917	0.0608952	TMB	POST-TREATMENT
FYB	6158.68	0.114274	0.114274	0	0	0.267101	0.427831	0.668774	0.871844	0.0595614	TMB	POST-TREATMENT
IL12B	12.4145	1.11166	1.11166	0	0	2.57639	0.431479	0.66612	0.871844	0.0595614	TMB	POST-TREATMENT
SDHA	4224.39	-0.0823244	0.0823244	0	0	0.192617	-0.427398	0.669089	0.871844	0.0595614	TMB	POST-TREATMENT
CCR6	305.136	0.219586	0.219586	0	0	0.521794	0.420828	0.673881	0.87514	0.0579223	TMB	POST-TREATMENT
CCR2	493.451	0.182965	0.182965	0	0	0.448492	0.407957	0.683306	0.882642	0.0542154	TMB	POST-TREATMENT
IL22	0.646551	-1.54421	1.54421	1	0	3.7968	-0.406713	0.684219	0.882642	0.0542154	TMB	POST-TREATMENT
CD40LG	270.354	0.252386	0.252386	0	0	0.625457	0.403523	0.686563	0.882724	0.0541749	TMB	POST-TREATMENT
HLA-A	21235.5	0.552915	0.552915	0	0	1.39358	0.396757	0.691547	0.883262	0.0539102	TMB	POST-TREATMENT
ZBTB46	276.634	-0.1215	0.1215	0	0	0.304892	-0.398501	0.690261	0.883262	0.0539102	TMB	POST-TREATMENT
BCL2L11	1146.95	-0.0940597	0.0940597	0	0	0.241373	-0.389686	0.696768	0.884174	0.0534622	TMB	POST-TREATMENT
IL18	1901.42	-0.0845528	0.0845528	0	0	0.218756	-0.386516	0.699114	0.884174	0.0534622	TMB	POST-TREATMENT
ITGB2	5356.33	0.120068	0.120068	0	0	0.310386	0.386836	0.698877	0.884174	0.0534622	TMB	POST-TREATMENT
CORO1A	3569.64	-0.128762	0.128762	0	0	0.337261	-0.381787	0.702619	0.88549	0.0528161	TMB	POST-TREATMENT
IFITM2	14119.6	-0.106922	0.106922	0	0	0.284385	-0.375977	0.706934	0.88549	0.0528161	TMB	POST-TREATMENT
NRP1	9685.93	-0.100558	0.100558	0	0	0.269747	-0.372786	0.709308	0.88549	0.0528161	TMB	POST-TREATMENT
PIK3CD	1600.53	-0.139755	0.139755	0	0	0.371913	-0.375774	0.707085	0.88549	0.0528161	TMB	POST-TREATMENT
FASLG	238.856	0.242593	0.242593	0	0	0.67987	0.356823	0.721225	0.886076	0.0525291	TMB	POST-TREATMENT
HLA-DMB	801.47	-0.401475	0.401475	0	0	1.10003	-0.364966	0.715137	0.886076	0.0525291	TMB	POST-TREATMENT
KIR2DL2	0.980384	1.39023	1.39023	0	0	3.78343	0.367453	0.713281	0.886076	0.0525291	TMB	POST-TREATMENT
KLRD1	944.898	0.125414	0.125414	0	0	0.347978	0.360409	0.718542	0.886076	0.0525291	TMB	POST-TREATMENT
STAT4	550.499	0.21366	0.21366	0	0	0.59623	0.358351	0.720081	0.886076	0.0525291	TMB	POST-TREATMENT
TLR3	581.027	-0.203036	0.203036	0	0	0.587648	-0.345507	0.729713	0.890849	0.050196	TMB	POST-TREATMENT
TP63	115.879	-0.311904	0.311904	0	0	0.902556	-0.345578	0.72966	0.890849	0.050196	TMB	POST-TREATMENT
GRAP2	969.44	0.111929	0.111929	0	0	0.328377	0.340854	0.733214	0.892307	0.0494856	TMB	POST-TREATMENT
HLA-B	13169.1	0.428893	0.428893	0	0	1.31016	0.32736	0.743396	0.901862	0.0448597	TMB	POST-TREATMENT
CD52	34726.9	0.0968607	0.0968607	0	0	0.313677	0.308791	0.757481	0.904768	0.0434626	TMB	POST-TREATMENT
CXCL9	4559.82	-0.168581	0.168581	0	0	0.545075	-0.30928	0.757108	0.904768	0.0434626	TMB	POST-TREATMENT
HLA-DQA2	56.0986	-0.406438	0.406438	0	0	1.31521	-0.309029	0.7573	0.904768	0.0434626	TMB	POST-TREATMENT
IL3RA	1031.76	-0.106467	0.106467	0	0	0.332461	-0.320238	0.748788	0.904768	0.0434626	TMB	POST-TREATMENT
ZAP70	650.539	0.169947	0.169947	0	0	0.53468	0.317848	0.7506	0.904768	0.0434626	TMB	POST-TREATMENT
KIR2DL1	0.16364	-1.15544	1.15544	0	0	3.80323	-0.303805	0.761276	0.906505	0.04263	TMB	POST-TREATMENT
KLRF1	123.458	-0.251348	0.251348	0	0	0.851245	-0.295272	0.767786	0.911452	0.0402662	TMB	POST-TREATMENT
TGFB1	12807.3	0.0719418	0.0719418	0	0	0.247835	0.29028	0.771602	0.91318	0.0394436	TMB	POST-TREATMENT
HLA-F	690.929	0.0685232	0.0685232	0	0	0.24188	0.283294	0.776951	0.916708	0.037769	TMB	POST-TREATMENT
NOS2	9.00074	-0.70405	0.70405	0	0	2.60148	-0.270634	0.786672	0.925356	0.033691	TMB	POST-TREATMENT
C1QB	48947.1	-0.0826715	0.0826715	0	0	0.319074	-0.259098	0.79556	0.932052	0.0305598	TMB	POST-TREATMENT
IL4	3.53504	0.960956	0.960956	0	0	3.73918	0.256996	0.797182	0.932052	0.0305598	TMB	POST-TREATMENT
CCL21	7630.37	-0.0915941	0.0915941	0	0	0.370015	-0.247542	0.804489	0.937763	0.0279071	TMB	POST-TREATMENT
CCR1	1118	0.106436	0.106436	0	0	0.441457	0.241102	0.809476	0.937925	0.0278317	TMB	POST-TREATMENT
GNLY	2694.59	0.129303	0.129303	0	0	0.535997	0.241238	0.809371	0.937925	0.0278317	TMB	POST-TREATMENT
CD1D	111.415	0.141092	0.141092	0	0	0.610771	0.231006	0.81731	0.944176	0.0249469	TMB	POST-TREATMENT
HLA-DQB2	212.126	-0.124284	0.124284	0	0	0.603264	-0.20602	0.836775	0.963786	0.0160194	TMB	POST-TREATMENT
ADORA2A	681.015	0.0678129	0.0678129	0	0	0.340612	0.199091	0.842191	0.963875	0.0159794	TMB	POST-TREATMENT
CD70	71.8358	0.137318	0.137318	0	0	0.788569	0.174136	0.861759	0.963875	0.0159794	TMB	POST-TREATMENT
CXCR2	1018.12	-0.108887	0.108887	0	0	0.616188	-0.176711	0.859735	0.963875	0.0159794	TMB	POST-TREATMENT
GATA3	553.923	-0.0524996	0.0524996	0	0	0.294469	-0.178286	0.858499	0.963875	0.0159794	TMB	POST-TREATMENT
HGF	852.588	0.0683471	0.0683471	0	0	0.343212	0.19914	0.842154	0.963875	0.0159794	TMB	POST-TREATMENT
IL23A	22.3907	0.174212	0.174212	0	0	0.954751	0.182468	0.855215	0.963875	0.0159794	TMB	POST-TREATMENT
LMNA	27701.6	0.0719502	0.0719502	0	0	0.378696	0.189995	0.849313	0.963875	0.0159794	TMB	POST-TREATMENT
SIT1	498.315	0.0933066	0.0933066	0	0	0.528457	0.176564	0.859851	0.963875	0.0159794	TMB	POST-TREATMENT
TLR7	448.905	0.112967	0.112967	0	0	0.586247	0.192695	0.847198	0.963875	0.0159794	TMB	POST-TREATMENT
TYROBP	82789.6	0.0625692	0.0625692	0	0	0.324494	0.192821	0.847099	0.963875	0.0159794	TMB	POST-TREATMENT
GZMB	1845.61	0.061648	0.061648	0	0	0.374949	0.164417	0.869403	0.968925	0.0137098	TMB	POST-TREATMENT
HLA-E	85648.3	-0.0356241	0.0356241	0	0	0.21986	-0.162031	0.871281	0.968925	0.0137098	TMB	POST-TREATMENT
HLA-DQA1	8080.71	0.089105	0.089105	0	0	0.566042	0.157418	0.874916	0.970179	0.0131482	TMB	POST-TREATMENT
ALOX15B	1585.32	-0.0749786	0.0749786	0	0	0.590079	-0.127065	0.898889	0.970553	0.0129809	TMB	POST-TREATMENT
CCL5	8259.78	0.0452727	0.0452727	0	0	0.344253	0.13151	0.895372	0.970553	0.0129809	TMB	POST-TREATMENT
CD14	9282.97	-0.0359465	0.0359465	0	0	0.281374	-0.127753	0.898344	0.970553	0.0129809	TMB	POST-TREATMENT
CD274	522.224	0.0626262	0.0626262	0	0	0.462743	0.135337	0.892346	0.970553	0.0129809	TMB	POST-TREATMENT
CLEC4C	77.4463	0.134463	0.134463	0	0	1.22395	0.10986	0.91252	0.970553	0.0129809	TMB	POST-TREATMENT
FOXP3	199.949	0.101999	0.101999	0	0	0.805019	0.126704	0.899174	0.970553	0.0129809	TMB	POST-TREATMENT
GAGE10	10.1348	-0.336319	0.336319	0	0	2.61297	-0.128712	0.897586	0.970553	0.0129809	TMB	POST-TREATMENT
IDO2	6.39083	0.29607	0.29607	0	0	2.03942	0.145174	0.884574	0.970553	0.0129809	TMB	POST-TREATMENT
IKZF3	2362.37	-0.0463443	0.0463443	0	0	0.348797	-0.132869	0.894297	0.970553	0.0129809	TMB	POST-TREATMENT
IL10	188.451	0.0790219	0.0790219	0	0	0.676754	0.116766	0.907045	0.970553	0.0129809	TMB	POST-TREATMENT
IL2RA	489.419	0.0565122	0.0565122	0	0	0.515948	0.109531	0.912782	0.970553	0.0129809	TMB	POST-TREATMENT
MPO	80.6494	0.107155	0.107155	0	0	0.876815	0.122209	0.902733	0.970553	0.0129809	TMB	POST-TREATMENT
MRC1	10450.2	-0.0398034	0.0398034	0	0	0.363775	-0.109418	0.912871	0.970553	0.0129809	TMB	POST-TREATMENT
PTPN6	4889.31	-0.0336768	0.0336768	0	0	0.219682	-0.153298	0.878163	0.970553	0.0129809	TMB	POST-TREATMENT
TARP	1231.84	-0.0508615	0.0508615	0	0	0.448241	-0.113469	0.909659	0.970553	0.0129809	TMB	POST-TREATMENT
SRGN	22086.8	-0.0307524	0.0307524	0	0	0.292191	-0.105247	0.916179	0.971401	0.0126014	TMB	POST-TREATMENT
JAML	648.399	-0.0582021	0.0582021	0	0	0.587537	-0.0990612	0.92109	0.973939	0.0114682	TMB	POST-TREATMENT
HLA-DRB1	136012	0.0481046	0.0481046	0	0	0.505308	0.0951986	0.924157	0.97452	0.0112093	TMB	POST-TREATMENT
IL7R	8617.54	-0.0347885	0.0347885	0	0	0.398824	-0.0872279	0.93049	0.978532	0.00942496	TMB	POST-TREATMENT
CTSS	11312.3	-0.0185628	0.0185628	0	0	0.240829	-0.0770788	0.938561	0.981684	0.00802833	TMB	POST-TREATMENT
TNFRSF4	350.266	-0.0467447	0.0467447	0	0	0.58548	-0.0798399	0.936365	0.981684	0.00802833	TMB	POST-TREATMENT
HLA-C	15291.3	0.0432851	0.0432851	0	0	0.636543	0.0680004	0.945785	0.981931	0.00791905	TMB	POST-TREATMENT
LILRB1	373.618	0.0364172	0.0364172	0	0	0.507155	0.0718069	0.942756	0.981931	0.00791905	TMB	POST-TREATMENT
SLAMF8	1572.34	0.0192083	0.0192083	0	0	0.285765	0.0672171	0.946409	0.981931	0.00791905	TMB	POST-TREATMENT
BATF	2755.45	0.0178845	0.0178845	0	0	0.3159	0.0566146	0.954852	0.988042	0.00522448	TMB	POST-TREATMENT
ITGAE	425.331	0.0230111	0.0230111	0	0	0.452034	0.0509057	0.959401	0.988462	0.00503989	TMB	POST-TREATMENT
PTPRCAP	27.2854	0.0496766	0.0496766	0	0	1.03281	0.0480986	0.961638	0.988462	0.00503989	TMB	POST-TREATMENT
SH2D1B	115.836	-0.0336794	0.0336794	0	0	0.724463	-0.0464888	0.962921	0.988462	0.00503989	TMB	POST-TREATMENT
IFNG	98.0251	0.0287801	0.0287801	0	0	0.757361	0.0380005	0.969687	0.990156	0.00429655	TMB	POST-TREATMENT
IL7	200.716	0.0214216	0.0214216	0	0	0.553426	0.0387072	0.969124	0.990156	0.00429655	TMB	POST-TREATMENT
CD163	7435.64	0.00852336	0.00852336	0	0	0.317428	0.0268513	0.978578	0.996605	0.00147704	TMB	POST-TREATMENT
CXCR3	22.1215	0.0103606	0.0103606	0	0	0.961973	0.0107702	0.991407	0.998345	0.000719242	TMB	POST-TREATMENT
LST1	990.747	-0.00312139	0.00312139	0	0	0.365486	-0.00854038	0.993186	0.998345	0.000719242	TMB	POST-TREATMENT
MADCAM1	67.5688	0.0167851	0.0167851	0	0	0.977433	0.0171726	0.986299	0.998345	0.000719242	TMB	POST-TREATMENT
MAGEA10	0.27714	0.0724729	0.0724729	0	0	3.80789	0.0190323	0.984815	0.998345	0.000719242	TMB	POST-TREATMENT
TNF	147.267	-0.00744627	0.00744627	0	0	0.52158	-0.0142764	0.988609	0.998345	0.000719242	TMB	POST-TREATMENT
GAGE1	0.297909	0	0	0	0	3.80789	0	1	1	0	TMB	POST-TREATMENT
GAGE12J	0.0711278	0	0	0	0	3.80789	0	1	1	0	TMB	POST-TREATMENT
BAGE	0	0	0	0	0	0	0	1	NA	#VALUE!	TMB	POST-TREATMENT
CTAG1B	0	0	0	0	0	0	0	1	NA	#VALUE!	TMB	POST-TREATMENT
GAGE13	0	NA	#VALUE!	#VALUE!	#VALUE!	NA	NA	NA	NA	#VALUE!	TMB	POST-TREATMENT
GAGE2C	0	NA	#VALUE!	#VALUE!	#VALUE!	NA	NA	NA	NA	#VALUE!	TMB	POST-TREATMENT
IL17F	0	NA	#VALUE!	#VALUE!	#VALUE!	NA	NA	NA	NA	#VALUE!	TMB	POST-TREATMENT
MAGEA1	0	0	0	0	0	0	0	1	NA	#VALUE!	TMB	POST-TREATMENT
MLANA	0	NA	#VALUE!	#VALUE!	#VALUE!	NA	NA	NA	NA	#VALUE!	TMB	POST-TREATMENT
SSX2	0	NA	#VALUE!	#VALUE!	#VALUE!	NA	NA	NA	NA	#VALUE!	TMB	POST-TREATMENT
